# Supplementary material
Source: publisher figshare collection journal article supplement (https://acs.figshare.com/ndownloader/files/9587224)
Supplement: Supplementary file 1 [file 9587224]

 
data_1_4H2O
 
_audit_creation_method            SHELXL-2014
_chemical_name_systematic
;
 ?
;
_chemical_name_common             ?
_chemical_melting_point           ?
_chemical_formula_moiety          ?
_chemical_formula_sum
 'C24 H26 Cl2 N2 O8' 
_chemical_formula_weight          541.37

loop_
 _atom_type_symbol
 _atom_type_description
 _atom_type_scat_dispersion_real
 _atom_type_scat_dispersion_imag
 _atom_type_scat_source
 'C'  'C'   0.0033   0.0016
 'International Tables Vol C Tables 4.2.6.8 and 6.1.1.4'
 'H'  'H'   0.0000   0.0000
 'International Tables Vol C Tables 4.2.6.8 and 6.1.1.4'
 'N'  'N'   0.0061   0.0033
 'International Tables Vol C Tables 4.2.6.8 and 6.1.1.4'
 'O'  'O'   0.0106   0.0060
 'International Tables Vol C Tables 4.2.6.8 and 6.1.1.4'
 'Cl'  'Cl'   0.1484   0.1585
 'International Tables Vol C Tables 4.2.6.8 and 6.1.1.4'
 
_space_group_crystal_system       monoclinic
_space_group_IT_number            14
_space_group_name_H-M_alt         'P 21/c'
_space_group_name_Hall            '-P 2ybc'
 
_shelx_space_group_comment
;
The symmetry employed for this shelxl refinement is uniquely defined
by the following loop, which should always be used as a source of
symmetry information in preference to the above space-group names.
They are only intended as comments.
;
 
loop_
 _space_group_symop_operation_xyz
 'x, y, z'
 '-x, y+1/2, -z+1/2'
 '-x, -y, -z'
 'x, -y-1/2, z-1/2'
 
_cell_length_a                    7.6272(3)
_cell_length_b                    26.0909(10)
_cell_length_c                    6.9724(3)
_cell_angle_alpha                 90
_cell_angle_beta                  113.4510(10)
_cell_angle_gamma                 90
_cell_volume                      1272.90(9)
_cell_formula_units_Z             2
_cell_measurement_temperature     296(2)
_cell_measurement_reflns_used     4135 
_cell_measurement_theta_min       2.91 
_cell_measurement_theta_max       24.72 
 
_exptl_crystal_description        prism 
_exptl_crystal_colour             yellow 
_exptl_crystal_density_meas       'not measured' 
_exptl_crystal_density_method     'not measured'             
_exptl_crystal_density_diffrn     1.412          
_exptl_crystal_F_000              564
_exptl_transmission_factor_min    'not measured'
_exptl_transmission_factor_max    'not measured'
_exptl_crystal_size_max           0.400
_exptl_crystal_size_mid           0.120
_exptl_crystal_size_min           0.100
_exptl_absorpt_coefficient_mu     0.306
_shelx_estimated_absorpt_T_min    0.887
_shelx_estimated_absorpt_T_max    0.970
_exptl_absorpt_correction_type    'multi-scan' 
_exptl_absorpt_correction_T_min   0.6916  
_exptl_absorpt_correction_T_max   0.7457  
_exptl_absorpt_process_details    'SADABS'
_exptl_special_details ;?; 
_diffrn_ambient_temperature       296(2)
_diffrn_radiation_wavelength      0.71073
_diffrn_radiation_type            MoK\a
_diffrn_source                    'fine-focus sealed tube'
_diffrn_measurement_device_type   'CCD area detector' 
_diffrn_measurement_method        'phi and omega scans' 
_diffrn_detector_area_resol_mean  ? 
_diffrn_reflns_number             17425
_diffrn_reflns_av_unetI/netI      0.0316
_diffrn_reflns_av_R_equivalents   0.0402
_diffrn_reflns_limit_h_min        -9
_diffrn_reflns_limit_h_max        10
_diffrn_reflns_limit_k_min        -34
_diffrn_reflns_limit_k_max        34
_diffrn_reflns_limit_l_min        -8
_diffrn_reflns_limit_l_max        8
_diffrn_reflns_theta_min          1.561
_diffrn_reflns_theta_max          28.284
_diffrn_reflns_theta_full         25.242
_diffrn_measured_fraction_theta_max   0.978
_diffrn_measured_fraction_theta_full  1.000
_diffrn_reflns_Laue_measured_fraction_max    0.978
_diffrn_reflns_Laue_measured_fraction_full   1.000
_diffrn_reflns_point_group_measured_fraction_max   0.978
_diffrn_reflns_point_group_measured_fraction_full  1.000
_reflns_number_total              3096
_reflns_number_gt                 2155
_reflns_threshold_expression      'I > 2\s(I)'
_reflns_Friedel_coverage          0.000
_reflns_Friedel_fraction_max      .
_reflns_Friedel_fraction_full     .
 
_reflns_special_details
;
 Reflections were merged by SHELXL according to the crystal
 class for the calculation of statistics and refinement.
 
 _reflns_Friedel_fraction is defined as the number of unique
 Friedel pairs measured divided by the number that would be
 possible theoretically, ignoring centric projections and
 systematic absences.
;
 
_computing_data_collection        'Bruker SMART'
_computing_cell_refinement        'Bruker SMART'
_computing_data_reduction         'Bruker SAINT'
_computing_structure_solution     'Bruker SHELXTL'
_computing_structure_refinement   'SHELXL-2014 (Sheldrick, 2014)'
_computing_molecular_graphics     'Bruker SHELXTL'
_computing_publication_material   'Bruker SHELXTL'
_refine_special_details
;
 ?
;
_refine_ls_structure_factor_coef  Fsqd
_refine_ls_matrix_type            full
_refine_ls_weighting_scheme       calc
_refine_ls_weighting_details
'w=1/[\s^2^(Fo^2^)+(0.0558P)^2^+0.3110P] where P=(Fo^2^+2Fc^2^)/3'
_atom_sites_solution_primary      direct
_atom_sites_solution_secondary    difmap
_atom_sites_solution_hydrogens    mixed
_refine_ls_hydrogen_treatment     mixed
_refine_ls_extinction_method      none
_refine_ls_extinction_coef        .
_refine_ls_number_reflns          3096
_refine_ls_number_parameters      179
_refine_ls_number_restraints      4
_refine_ls_R_factor_all           0.0677
_refine_ls_R_factor_gt            0.0411
_refine_ls_wR_factor_ref          0.1174
_refine_ls_wR_factor_gt           0.1026
_refine_ls_goodness_of_fit_ref    1.029
_refine_ls_restrained_S_all       1.030
_refine_ls_shift/su_max           0.000
_refine_ls_shift/su_mean          0.000
 
loop_
 _atom_site_label
 _atom_site_type_symbol
 _atom_site_fract_x
 _atom_site_fract_y
 _atom_site_fract_z
 _atom_site_U_iso_or_equiv
 _atom_site_adp_type
 _atom_site_occupancy
 _atom_site_site_symmetry_order  
 _atom_site_calc_flag
 _atom_site_refinement_flags_posn
 _atom_site_refinement_flags_adp
 _atom_site_refinement_flags_occupancy
 _atom_site_disorder_assembly
 _atom_site_disorder_group
C1 C 0.4538(2) 0.47434(6) 0.9779(3) 0.0307(4) Uani 1 1 d . . . . .
C2 C 0.3350(3) 0.46013(6) 0.7778(3) 0.0406(4) Uani 1 1 d . . . . .
H2A H 0.3096 0.4831 0.6680 0.049 Uiso 1 1 calc R U . . .
C3 C 0.2542(3) 0.41235(6) 0.7400(3) 0.0400(4) Uani 1 1 d . . . . .
H3A H 0.1745 0.4032 0.6042 0.048 Uiso 1 1 calc R U . . .
C4 C 0.4021(3) 0.39141(6) 1.0930(3) 0.0403(4) Uani 1 1 d . . . . .
H4A H 0.4241 0.3679 1.2005 0.048 Uiso 1 1 calc R U . . .
C5 C 0.4857(3) 0.43879(7) 1.1366(3) 0.0428(5) Uani 1 1 d . . . . .
H5A H 0.5646 0.4473 1.2735 0.051 Uiso 1 1 calc R U . . .
C6 C 0.2017(2) 0.32806(6) 0.8478(3) 0.0301(4) Uani 1 1 d . . . . .
C7 C 0.0089(2) 0.32439(6) 0.7251(3) 0.0345(4) Uani 1 1 d . . . . .
H7A H -0.0646 0.3537 0.6757 0.041 Uiso 1 1 calc R U . . .
C8 C -0.0727(2) 0.27633(6) 0.6770(3) 0.0346(4) Uani 1 1 d . . . . .
H8A H -0.2026 0.2732 0.5947 0.041 Uiso 1 1 calc R U . . .
C9 C 0.0372(2) 0.23279(6) 0.7504(3) 0.0291(3) Uani 1 1 d . . . . .
C10 C 0.2310(2) 0.23718(6) 0.8747(3) 0.0323(4) Uani 1 1 d . . . . .
H10A H 0.3045 0.2079 0.9245 0.039 Uiso 1 1 calc R U . . .
C11 C 0.3150(2) 0.28514(6) 0.9248(3) 0.0340(4) Uani 1 1 d . . . . .
H11A H 0.4446 0.2884 1.0082 0.041 Uiso 1 1 calc R U . . .
C12 C -0.0569(2) 0.18151(6) 0.6892(3) 0.0328(4) Uani 1 1 d . . . . .
N1 N 0.28805(19) 0.37866(5) 0.8952(2) 0.0307(3) Uani 1 1 d . . . . .
O1 O 0.06367(19) 0.14312(4) 0.7579(2) 0.0450(4) Uani 1 1 d D . . . .
H1 H 0.008(4) 0.1122(7) 0.719(4) 0.084(8) Uiso 1 1 d D . . . .
O2 O -0.22558(19) 0.17660(5) 0.5857(2) 0.0518(4) Uani 1 1 d . . . . .
O3 O -0.0684(2) 0.05361(5) 0.6537(3) 0.0528(4) Uani 1 1 d . . . . .
H3B H 0.017(4) 0.0299(11) 0.710(4) 0.079 Uiso 1 1 d . U . . .
H3C H -0.104(4) 0.0493(9) 0.523(5) 0.079 Uiso 1 1 d . U . . .
O4 O -0.4425(2) 0.14524(6) 0.1359(3) 0.0690(5) Uani 1 1 d D . . . .
H4B H -0.383(4) 0.1560(11) 0.265(3) 0.103 Uiso 1 1 d D U . . .
H4C H -0.388(4) 0.1154(8) 0.138(5) 0.103 Uiso 1 1 d D U . . .
Cl1 Cl 0.79516(9) 0.04146(2) 0.17778(8) 0.0611(2) Uani 1 1 d . . . . .
 
loop_
 _atom_site_aniso_label
 _atom_site_aniso_U_11
 _atom_site_aniso_U_22
 _atom_site_aniso_U_33
 _atom_site_aniso_U_23
 _atom_site_aniso_U_13
 _atom_site_aniso_U_12
C1 0.0336(9) 0.0223(7) 0.0349(9) -0.0026(6) 0.0124(7) -0.0021(6)
C2 0.0546(11) 0.0272(8) 0.0323(10) 0.0008(7) 0.0092(8) -0.0087(7)
C3 0.0515(11) 0.0292(8) 0.0302(9) -0.0021(7) 0.0068(8) -0.0082(7)
C4 0.0491(11) 0.0326(9) 0.0334(10) 0.0021(7) 0.0103(8) -0.0107(7)
C5 0.0545(12) 0.0330(9) 0.0315(10) -0.0017(7) 0.0070(8) -0.0143(8)
C6 0.0352(9) 0.0227(7) 0.0336(9) -0.0031(6) 0.0150(7) -0.0054(6)
C7 0.0334(9) 0.0247(8) 0.0427(10) 0.0005(7) 0.0123(8) 0.0019(6)
C8 0.0286(8) 0.0297(8) 0.0423(10) -0.0017(7) 0.0109(7) -0.0019(6)
C9 0.0336(8) 0.0249(7) 0.0301(9) -0.0020(6) 0.0142(7) -0.0036(6)
C10 0.0347(9) 0.0252(7) 0.0345(9) 0.0006(6) 0.0112(7) 0.0009(6)
C11 0.0304(8) 0.0307(8) 0.0371(10) -0.0005(7) 0.0095(7) -0.0020(6)
C12 0.0378(9) 0.0262(8) 0.0339(9) -0.0014(7) 0.0139(7) -0.0025(7)
N1 0.0344(7) 0.0236(6) 0.0334(8) -0.0035(5) 0.0128(6) -0.0047(5)
O1 0.0463(8) 0.0237(6) 0.0521(8) -0.0014(5) 0.0059(6) -0.0001(5)
O2 0.0350(7) 0.0339(7) 0.0750(10) -0.0062(6) 0.0098(7) -0.0071(5)
O3 0.0690(10) 0.0283(7) 0.0515(9) -0.0050(6) 0.0138(8) -0.0007(6)
O4 0.0494(10) 0.0583(10) 0.0856(13) 0.0040(9) 0.0126(9) 0.0050(7)
Cl1 0.0755(4) 0.0480(3) 0.0435(3) -0.0043(2) 0.0062(3) 0.0123(2)
 
_geom_special_details
;
 All esds (except the esd in the dihedral angle between two l.s. planes)
 are estimated using the full covariance matrix.  The cell esds are taken
 into account individually in the estimation of esds in distances, angles
 and torsion angles; correlations between esds in cell parameters are only
 used when they are defined by crystal symmetry.  An approximate (isotropic)
 treatment of cell esds is used for estimating esds involving l.s. planes.
;
 
loop_
 _geom_bond_atom_site_label_1
 _geom_bond_atom_site_label_2
 _geom_bond_distance
 _geom_bond_site_symmetry_2
 _geom_bond_publ_flag
C1 C2 1.378(2) . ?
C1 C5 1.389(2) . ?
C1 C1 1.487(3) 3_667 ?
C2 C3 1.369(2) . ?
C3 N1 1.337(2) . ?
C4 N1 1.347(2) . ?
C4 C5 1.369(2) . ?
C6 C7 1.379(2) . ?
C6 C11 1.385(2) . ?
C6 N1 1.4534(19) . ?
C7 C8 1.381(2) . ?
C8 C9 1.383(2) . ?
C9 C10 1.389(2) . ?
C9 C12 1.498(2) . ?
C10 C11 1.386(2) . ?
C12 O2 1.206(2) . ?
C12 O1 1.315(2) . ?
 
loop_
 _geom_angle_atom_site_label_1
 _geom_angle_atom_site_label_2
 _geom_angle_atom_site_label_3
 _geom_angle
 _geom_angle_site_symmetry_1
 _geom_angle_site_symmetry_3
 _geom_angle_publ_flag
C2 C1 C5 117.57(14) . . ?
C2 C1 C1 121.21(19) . 3_667 ?
C5 C1 C1 121.21(19) . 3_667 ?
C3 C2 C1 120.29(16) . . ?
N1 C3 C2 121.03(16) . . ?
N1 C4 C5 120.27(16) . . ?
C4 C5 C1 120.54(17) . . ?
C7 C6 C11 122.06(14) . . ?
C7 C6 N1 118.60(14) . . ?
C11 C6 N1 119.33(14) . . ?
C6 C7 C8 118.69(15) . . ?
C7 C8 C9 120.52(15) . . ?
C8 C9 C10 120.05(14) . . ?
C8 C9 C12 118.50(14) . . ?
C10 C9 C12 121.44(14) . . ?
C11 C10 C9 120.16(15) . . ?
C6 C11 C10 118.52(15) . . ?
O2 C12 O1 124.22(15) . . ?
O2 C12 C9 122.79(15) . . ?
O1 C12 C9 112.99(14) . . ?
C3 N1 C4 120.28(14) . . ?
C3 N1 C6 119.27(14) . . ?
C4 N1 C6 120.45(14) . . ?
 
loop_
 _geom_hbond_atom_site_label_D 
 _geom_hbond_atom_site_label_H 
 _geom_hbond_atom_site_label_A 
 _geom_hbond_distance_DH 
 _geom_hbond_distance_HA 
 _geom_hbond_distance_DA 
 _geom_hbond_angle_DHA 
 _geom_hbond_site_symmetry_A 
C2 H2A Cl1  0.93 2.69 3.6153(19) 173.2 2_655
C3 H3A O1  0.93 2.53 3.408(2) 158.6 4_565
C5 H5A Cl1  0.93 2.68 3.6037(19) 172.6 4_567
C7 H7A Cl1  0.93 2.94 3.8197(17) 158.6 4_466
C11 H11A O2  0.93 2.52 3.377(2) 152.6 4_666
O1 H1 O3  0.902(17) 1.634(17) 2.5325(17) 174(3) .
O3 H3B Cl1  0.87(3) 2.29(3) 3.1509(16) 171(3) 3_656
O3 H3C Cl1  0.85(3) 2.23(3) 3.0736(18) 177(2) 1_455
O4 H4B O2  0.876(17) 2.145(18) 3.019(2) 176(3) .
O4 H4C Cl1  0.881(17) 2.331(18) 3.2067(17) 172(3) 1_455
 
_refine_diff_density_max    0.270
_refine_diff_density_min   -0.318
_refine_diff_density_rms    0.045

_shelxl_version_number 2014-3

_shelx_res_file
;
TITL 2 in P2(1)/c
CELL 0.71073   7.6272  26.0909   6.9724  90.000 113.451  90.000
ZERR   2   0.0003   0.0010   0.0003   0.000   0.001   0.000
LATT  1
SYMM -X, 0.5+Y, 0.5-Z
SFAC C H N O CL
UNIT 48 52 4 16 4
TEMP 23.000
ACTA
L.S. 40
BOND
FMAP 2
PLAN 5
ACTA
HTAB
Size 0.4 0.12 0.10
EQIV $1 -x+1, y+1/2, -z+1/2
HTAB C2 Cl1_$1
EQIV $2 x, -y+1/2, z-1/2
HTAB C3 O1_$2
EQIV $3 x, -y+1/2, z+3/2
HTAB C5 Cl1_$3
EQIV $4 x-1, -y+1/2, z+1/2
HTAB C7 Cl1_$4
EQIV $5 x+1, -y+1/2, z+1/2
HTAB C11 O2_$5
HTAB O1 O3
EQIV $6 -x+1, -y, -z+1
HTAB O3 Cl1_$6
EQIV $7 x-1, y, z
HTAB O3 Cl1_$7
HTAB O4 O2
HTAB O4 Cl1_$7
WGHT    0.055800    0.311000
FVAR       0.13110
C1    1    0.453821    0.474339    0.977950    11.00000    0.03357    0.02234 =
         0.03493   -0.00265    0.01236   -0.00208
C2    1    0.335013    0.460125    0.777841    11.00000    0.05461    0.02723 =
         0.03233    0.00080    0.00925   -0.00867
AFIX  43
H2A   2    0.309614    0.483093    0.668018    11.00000   -1.20000
AFIX   0
C3    1    0.254215    0.412347    0.740004    11.00000    0.05148    0.02925 =
         0.03023   -0.00214    0.00678   -0.00819
AFIX  43
H3A   2    0.174541    0.403175    0.604225    11.00000   -1.20000
AFIX   0
C4    1    0.402131    0.391409    1.093048    11.00000    0.04906    0.03264 =
         0.03344    0.00212    0.01027   -0.01072
AFIX  43
H4A   2    0.424149    0.367915    1.200479    11.00000   -1.20000
AFIX   0
C5    1    0.485750    0.438794    1.136576    11.00000    0.05446    0.03297 =
         0.03152   -0.00167    0.00703   -0.01432
AFIX  43
H5A   2    0.564593    0.447255    1.273506    11.00000   -1.20000
AFIX   0
C6    1    0.201741    0.328059    0.847782    11.00000    0.03517    0.02271 =
         0.03357   -0.00314    0.01497   -0.00543
C7    1    0.008933    0.324390    0.725064    11.00000    0.03341    0.02473 =
         0.04275    0.00045    0.01231    0.00190
AFIX  43
H7A   2   -0.064634    0.353711    0.675656    11.00000   -1.20000
AFIX   0
C8    1   -0.072696    0.276331    0.677020    11.00000    0.02863    0.02967 =
         0.04233   -0.00174    0.01087   -0.00192
AFIX  43
H8A   2   -0.202570    0.273207    0.594657    11.00000   -1.20000
AFIX   0
C9    1    0.037180    0.232793    0.750433    11.00000    0.03365    0.02492 =
         0.03007   -0.00195    0.01416   -0.00362
C10   1    0.230951    0.237184    0.874723    11.00000    0.03471    0.02524 =
         0.03450    0.00061    0.01124    0.00089
AFIX  43
H10A  2    0.304459    0.207869    0.924486    11.00000   -1.20000
AFIX   0
C11   1    0.315026    0.285139    0.924767    11.00000    0.03044    0.03074 =
         0.03706   -0.00053    0.00954   -0.00204
AFIX  43
H11A  2    0.444604    0.288438    1.008169    11.00000   -1.20000
AFIX   0
C12   1   -0.056902    0.181510    0.689212    11.00000    0.03780    0.02621 =
         0.03393   -0.00135    0.01391   -0.00253
N1    3    0.288052    0.378658    0.895206    11.00000    0.03438    0.02360 =
         0.03335   -0.00347    0.01281   -0.00466
DFIX 0.86 O1 H1
O1    4    0.063665    0.143116    0.757912    11.00000    0.04628    0.02370 =
         0.05213   -0.00140    0.00590   -0.00011
H1    2    0.008095    0.112180    0.718992    11.00000    0.08441
O2    4   -0.225576    0.176603    0.585651    11.00000    0.03496    0.03392 =
         0.07505   -0.00616    0.00981   -0.00708
O3    4   -0.068425    0.053613    0.653717    11.00000    0.06898    0.02834 =
         0.05153   -0.00502    0.01383   -0.00070
H3B   2    0.017176    0.029869    0.710132    11.00000   -1.50000
H3C   2   -0.103583    0.049276    0.522990    11.00000   -1.50000
DFIX 0.86 O4 H4B O4 H4C
DANG 1.39 H4B H4C
O4    4   -0.442527    0.145242    0.135882    11.00000    0.04943    0.05834 =
         0.08562    0.00399    0.01257    0.00501
H4B   2   -0.382541    0.156010    0.264617    11.00000   -1.50000
H4C   2   -0.387803    0.115356    0.138259    11.00000   -1.50000
CL1   5    0.795164    0.041457    0.177784    11.00000    0.07548    0.04799 =
         0.04346   -0.00432    0.00622    0.01227

HKLF 4

REM  2 in P2(1)/c
REM R1 =  0.0411 for    2155 Fo > 4sig(Fo)  and  0.0677 for all    3096 data
REM    179 parameters refined using      4 restraints

END

WGHT      0.0497      0.3707

REM Instructions for potential hydrogen bonds
HTAB C2 Cl1_$1
HTAB C3 O1_$2
HTAB C5 Cl1_$3
HTAB C7 Cl1_$4
HTAB C11 O2_$5
HTAB O1 O3
HTAB O3 Cl1_$6
HTAB O3 Cl1_$7
HTAB O4 O2
HTAB O4 Cl1_$7

REM Highest difference peak  0.270,  deepest hole -0.318,  1-sigma level  0.045
Q1    1   0.7547  0.0151  0.1799  11.00000  0.05    0.27
Q2    1  -0.0053  0.2102  0.7204  11.00000  0.05    0.25
Q3    1   0.5000  0.5000  1.0000  10.50000  0.05    0.24
Q4    1  -0.0048  0.2526  0.6798  11.00000  0.05    0.23
Q5    1   0.2519  0.3077  0.8891  11.00000  0.05    0.21
;
_shelx_res_checksum   98860

_shelx_hkl_file
;
   0   0  -1   -0.30    0.03
   0   0  -1   -0.27    0.02
   0   0   1   -0.32    0.02
   0   0  -2  226.93    4.70
   0   0   2  228.01    4.38
   0   0   2  221.96    4.55
   0   0   2  226.04    4.52
   0   0  -3    0.04    0.05
   0   0   3   -0.06    0.04
   0   0   3   -0.06    0.04
   0   0   3    0.05    0.03
   0   0  -4    7.10    0.33
   0   0   4    7.74    0.30
   0   0   4    8.15    0.31
   0   0   4    8.25    0.23
   0   0  -5    0.12    0.10
   0   0   5    0.06    0.08
   0   0   5   -0.03    0.08
   0   0  -6   -0.05    0.09
   0   0   6   -0.06    0.07
   0   0   6    0.18    0.10
   0   0  -7   -0.07    0.11
   0   0  -8    0.04    0.13
   1   0   7   -0.01    0.10
  -1   0  -7    0.05    0.11
   1   0   6    0.38    0.13
   1   0   6    0.33    0.12
  -1   0  -6    0.44    0.15
   1   0   5   -0.13    0.07
   1   0   5    0.00    0.09
  -1   0  -5    0.06    0.10
   1   0   4    0.13    0.09
   1   0   4   -0.05    0.08
  -1   0  -4    0.20    0.09
   1   0   3    0.02    0.06
   1   0   3    0.05    0.06
  -1   0  -3    0.02    0.06
   1   0   2   20.70    0.54
   1   0   2   20.80    0.52
  -1   0  -2   21.40    0.56
   1   0   1    0.05    0.05
   1   0   1   -0.03    0.04
   1   0   1   -0.02    0.02
  -1   0  -1    0.01    0.04
   1   0   0   47.52    0.87
   1   0   0   42.93    0.87
   1   0   0   35.22    0.89
   1   0  -1   -0.15    0.01
   1   0  -1   -0.09    0.03
   1   0  -1   -0.12    0.03
   1   0  -2 1000.00   20.21
   1   0  -2  938.96   19.62
   1   0  -3   -0.05    0.03
   1   0  -3    0.06    0.05
   1   0  -3    0.02    0.04
  -1   0   3    0.00    0.04
  -1   0   3    0.08    0.04
   1   0  -4   37.10    0.84
   1   0  -4   36.46    0.85
   1   0  -4   35.00    0.95
  -1   0   4   37.59    0.86
  -1   0   4   37.62    0.84
   1   0  -5    0.20    0.10
  -1   0   5    0.00    0.07
  -1   0   5   -0.23    0.05
   1   0  -6    0.36    0.13
   1   0  -7    0.05    0.11
   1   0  -8    1.17    0.24
   2   0   7    0.08    0.12
   2   0   7    0.00    0.12
  -2   0  -7   -0.03    0.12
   2   0   6    0.09    0.10
   2   0   6    0.07    0.11
  -2   0  -6    0.11    0.11
   2   0   5    0.07    0.09
   2   0   5    0.05    0.09
  -2   0  -5    0.08    0.10
   2   0   4    0.03    0.08
   2   0   4   -0.01    0.08
  -2   0  -4    0.10    0.08
   2   0   3   -0.11    0.06
   2   0   3   -0.07    0.06
  -2   0  -3   -0.02    0.06
   2   0   2    3.94    0.20
   2   0   2    3.94    0.10
   2   0   2    3.74    0.20
  -2   0  -2    3.69    0.19
   2   0   1    0.01    0.03
   2   0   1   -0.02    0.04
   2   0   1   -0.06    0.04
   2   0   1   -0.02    0.04
   2   0   0    0.27    0.05
   2   0   0    0.18    0.06
   2   0   0    0.29    0.06
   2   0   0    0.13    0.05
   2   0  -1   -0.09    0.04
   2   0  -1   -0.03    0.04
   2   0  -1    0.01    0.03
   2   0  -1   -0.01    0.04
   2   0  -2  101.84    2.13
   2   0  -2  103.78    2.20
   2   0  -2  101.65    2.03
   2   0  -2  101.12    2.15
   2   0  -3   -0.03    0.03
   2   0  -3   -0.06    0.04
   2   0  -3    0.00    0.05
   2   0  -3   -0.15    0.04
   2   0  -4   77.90    1.70
   2   0  -4   78.31    1.61
   2   0  -4   75.93    1.79
   2   0  -4   76.39    1.68
   2   0  -5   -0.09    0.08
   2   0  -5   -0.02    0.07
   2   0  -5   -0.21    0.06
   2   0  -5   -0.08    0.05
   2   0  -6    0.14    0.10
   2   0  -7   -0.11    0.09
   2   0  -8    0.02    0.12
   3   0   7    0.10    0.15
   3   0   6    1.93    0.26
   3   0   6    2.03    0.26
  -3   0  -6    1.61    0.25
   3   0   5    0.13    0.11
   3   0   5    0.10    0.11
  -3   0  -5   -0.04    0.08
   3   0   4    1.16    0.18
   3   0   4    1.59    0.20
  -3   0  -4    1.10    0.17
   3   0   3    0.05    0.09
   3   0   3   -0.01    0.08
  -3   0  -3    0.04    0.07
   3   0   2   24.90    0.56
   3   0   2   24.55    0.69
   3   0   2   26.09    0.72
  -3   0  -2   24.98    0.70
   3   0   1   -0.02    0.03
   3   0   1   -0.03    0.03
   3   0   1    0.02    0.05
   3   0   1   -0.03    0.05
   3   0   1   -0.07    0.05
   3   0   0    0.48    0.07
   3   0   0    0.43    0.07
   3   0   0    0.53    0.08
   3   0   0    0.48    0.08
   3   0   0    0.46    0.08
   3   0  -1    0.00    0.05
   3   0  -1   -0.01    0.03
   3   0  -1   -0.01    0.04
   3   0  -1    0.01    0.04
   3   0  -1   -0.06    0.04
   3   0  -2    0.25    0.07
   3   0  -2    0.21    0.06
   3   0  -2    0.08    0.06
   3   0  -2    0.18    0.04
   3   0  -3    0.10    0.06
   3   0  -3   -0.15    0.04
   3   0  -3   -0.07    0.05
   3   0  -3   -0.02    0.02
   3   0  -4   45.88    1.13
   3   0  -4   46.90    1.19
   3   0  -4   47.52    0.99
   3   0  -4   49.76    1.16
   3   0  -5    0.13    0.09
   3   0  -5   -0.15    0.07
   3   0  -5    0.21    0.08
   3   0  -6   25.95    0.73
   3   0  -6   24.97    0.82
   3   0  -6   24.73    0.71
   3   0  -7    0.06    0.11
   3   0  -8    0.13    0.14
   4   0   6    0.06    0.13
   4   0   5   -0.10    0.09
   4   0   5   -0.02    0.10
  -4   0  -5    0.14    0.11
   4   0   4    0.30    0.12
   4   0   4    0.17    0.11
  -4   0  -4   -0.03    0.08
   4   0   3    0.04    0.10
   4   0   3   -0.12    0.09
  -4   0  -3    0.01    0.07
   4   0   2    2.86    0.22
   4   0   2    3.17    0.24
  -4   0  -2    3.22    0.22
   4   0   1   -0.06    0.06
   4   0   1   -0.02    0.05
   4   0   1   -0.01    0.07
   4   0   1    0.03    0.06
   4   0   1   -0.06    0.04
   4   0   0   59.54    1.40
   4   0   0   62.34    1.39
   4   0   0   61.85    1.45
   4   0   0   62.93    1.38
   4   0   0   62.15    1.37
   4   0  -1    0.00    0.05
   4   0  -1   -0.03    0.05
   4   0  -1    0.02    0.05
   4   0  -1   -0.01    0.05
   4   0  -1   -0.03    0.05
   4   0  -2    6.90    0.29
   4   0  -2    6.98    0.29
   4   0  -2    6.90    0.22
   4   0  -2    6.95    0.23
   4   0  -2    7.02    0.29
   4   0  -3   -0.03    0.03
   4   0  -3    0.01    0.06
   4   0  -3    0.00    0.05
   4   0  -3    0.19    0.07
   4   0  -4    1.29    0.16
   4   0  -4    1.06    0.15
   4   0  -4    1.21    0.16
   4   0  -5   -0.02    0.08
   4   0  -5   -0.07    0.07
   4   0  -5    0.08    0.09
   4   0  -6    0.12    0.10
   4   0  -6    0.16    0.12
   4   0  -6    0.16    0.11
   4   0  -7   -0.04    0.10
   4   0  -8    4.46    0.37
   5   0   5   -0.11    0.12
   5   0   4    0.69    0.17
   5   0   4    0.49    0.16
  -5   0  -4    0.56    0.16
   5   0   3    0.01    0.10
   5   0   3   -0.06    0.09
  -5   0  -3    0.03    0.09
   5   0   2    2.72    0.26
   5   0   2    3.05    0.25
  -5   0  -2    2.93    0.23
   5   0   1    0.04    0.09
   5   0   1    0.12    0.09
   5   0   1    0.03    0.08
   5   0   0    4.30    0.24
   5   0   0    4.26    0.22
   5   0   0    4.70    0.26
   5   0   0    4.24    0.25
   5   0   0    4.22    0.22
   5   0  -1    0.01    0.06
   5   0  -1   -0.01    0.07
   5   0  -1    0.04    0.07
   5   0  -1   -0.03    0.06
   5   0  -1   -0.01    0.06
   5   0  -2   40.77    0.92
   5   0  -2   40.99    1.05
   5   0  -2   40.49    1.05
   5   0  -2   40.46    0.95
   5   0  -2   41.89    1.04
   5   0  -3    0.02    0.07
   5   0  -3   -0.01    0.07
   5   0  -3    0.00    0.04
   5   0  -3   -0.03    0.07
   5   0  -4    0.41    0.12
   5   0  -4    0.51    0.13
   5   0  -4    0.52    0.13
   5   0  -5    0.03    0.10
   5   0  -5   -0.14    0.08
   5   0  -5    0.01    0.08
   5   0  -6    0.97    0.18
   5   0  -6    1.02    0.18
   5   0  -6    0.86    0.16
   5   0  -7    0.04    0.10
   5   0  -7    0.06    0.11
   5   0  -7   -0.04    0.10
   5   0  -8    1.18    0.23
   6   0   4    1.59    0.26
   6   0   3    0.05    0.11
   6   0   3   -0.10    0.09
  -6   0  -3    0.11    0.11
   6   0   2    2.38    0.28
   6   0   2    2.37    0.26
  -6   0  -2    2.04    0.24
   6   0   1    0.12    0.10
   6   0   1    0.03    0.09
   6   0   1   -0.01    0.08
   6   0   0    3.63    0.23
   6   0   0    3.90    0.24
   6   0   0    4.32    0.28
   6   0   0    4.51    0.28
   6   0   0    4.15    0.26
   6   0  -1   -0.10    0.06
   6   0  -1    0.03    0.05
   6   0  -1    0.05    0.08
   6   0  -1    0.10    0.09
   6   0  -1   -0.06    0.05
   6   0  -2    2.32    0.17
   6   0  -2    2.45    0.21
   6   0  -2    2.35    0.18
   6   0  -2    2.40    0.24
   6   0  -2    2.44    0.20
   6   0  -3   -0.18    0.07
   6   0  -3   -0.04    0.08
   6   0  -3   -0.04    0.09
   6   0  -4   19.03    0.65
   6   0  -4   18.02    0.65
   6   0  -4   18.78    0.66
   6   0  -5   -0.04    0.08
   6   0  -5    0.02    0.10
   6   0  -5   -0.07    0.08
   6   0  -6    0.18    0.11
   6   0  -6    0.38    0.14
   6   0  -6    0.30    0.12
   6   0  -7   -0.05    0.10
   6   0  -7    0.05    0.12
   6   0  -7   -0.17    0.09
   6   0  -8    0.82    0.20
   6   0  -8    0.39    0.16
   7   0   3   -0.02    0.11
   7   0   2    4.00    0.32
   7   0   2    5.16    0.36
   7   0   1   -0.08    0.09
   7   0   1    0.09    0.11
   7   0   1   -0.03    0.09
   7   0   0    5.06    0.32
   7   0   0    4.26    0.29
   7   0   0    5.22    0.33
   7   0  -1   -0.04    0.08
   7   0  -1    0.02    0.08
   7   0  -1    0.04    0.08
   7   0  -1   -0.01    0.07
   7   0  -1    0.09    0.09
   7   0  -2    0.73    0.15
   7   0  -2    0.48    0.14
   7   0  -2    0.37    0.12
   7   0  -3   -0.12    0.06
   7   0  -3   -0.02    0.09
   7   0  -3    0.02    0.09
   7   0  -4    0.95    0.18
   7   0  -4    0.92    0.18
   7   0  -4    0.79    0.16
   7   0  -5   -0.11    0.08
   7   0  -5    0.00    0.09
   7   0  -5   -0.02    0.10
   7   0  -6    5.66    0.37
   7   0  -6    5.37    0.37
   7   0  -6    5.88    0.38
   7   0  -7   -0.31    0.09
   7   0  -7   -0.04    0.09
   7   0  -7   -0.01    0.12
   7   0  -8    0.03    0.15
   7   0  -8    0.26    0.15
   8   0   2    0.57    0.18
   8   0   1    0.04    0.12
   8   0   1   -0.05    0.11
   8   0   0    3.62    0.30
   8   0   0    3.83    0.30
   8   0   0    3.40    0.33
   8   0  -1    0.12    0.10
   8   0  -1   -0.05    0.07
   8   0  -1    0.06    0.08
   8   0  -2    3.72    0.30
   8   0  -2    4.24    0.30
   8   0  -2    3.68    0.29
   8   0  -3    0.04    0.10
   8   0  -3    0.07    0.11
   8   0  -3   -0.17    0.10
   8   0  -4    0.11    0.12
   8   0  -4    0.02    0.10
   8   0  -4   -0.01    0.10
   8   0  -5    0.15    0.11
   8   0  -5    0.17    0.13
   8   0  -5   -0.02    0.10
   8   0  -6    0.16    0.14
   8   0  -6    0.18    0.13
   8   0  -6    0.02    0.12
   8   0  -7   -0.07    0.11
   8   0  -7    0.02    0.12
   8   0  -7   -0.07    0.12
   8   0  -8    0.55    0.20
   9   0   0    0.45    0.17
   9   0   0    0.63    0.18
   9   0  -2    2.35    0.29
   9   0  -2    2.64    0.29
   9   0  -3    0.01    0.11
   9   0  -3   -0.01    0.10
   9   0  -3    0.06    0.13
   9   0  -4    0.47    0.17
   9   0  -4    0.59    0.18
   9   0  -4    0.88    0.20
   9   0  -5   -0.19    0.10
   9   0  -5    0.08    0.13
   9   0  -5    0.04    0.11
   9   0  -6   -0.14    0.11
   9   0  -7   -0.02    0.15
  10   0  -3    0.02    0.13
  10   0  -4    1.14    0.24
  10   0  -5   -0.08    0.14
  10  -1  -5    0.68    0.21
  10  -1  -4    0.05    0.14
  10  -1  -3    0.11    0.13
   9  -1  -7    0.04    0.14
   9  -1  -6    0.09    0.14
   9  -1  -5   -0.08    0.13
   9  -1  -5   -0.11    0.09
   9  -1  -5    0.13    0.14
   9  -1  -4    0.07    0.12
   9  -1  -4    0.10    0.12
   9  -1  -4   -0.03    0.12
   9  -1  -3    1.27    0.23
   9  -1  -3    1.37    0.22
   9  -1  -3    1.17    0.21
   9  -1  -2    0.27    0.14
   9  -1  -2    0.26    0.14
   9  -1   0    0.33    0.15
   8  -1  -8    0.05    0.14
   8  -1  -7    0.05    0.12
   8  -1  -7    0.04    0.13
   8  -1  -7   -0.08    0.11
   8  -1  -6    1.09    0.22
   8  -1  -6    1.22    0.23
   8  -1  -6    0.57    0.18
   8  -1  -5    0.08    0.12
   8  -1  -5   -0.10    0.08
   8  -1  -5    0.16    0.12
   8  -1  -4    0.48    0.16
   8  -1  -4    0.38    0.14
   8  -1  -4    0.69    0.18
   8  -1  -3   -0.18    0.08
   8  -1  -3   -0.05    0.09
   8  -1  -3   -0.13    0.11
   8  -1  -2    0.01    0.10
   8  -1  -2    0.00    0.09
   8  -1  -2    0.04    0.11
   8  -1  -1    0.21    0.11
   8  -1  -1    0.04    0.10
   8  -1   0    1.12    0.20
   8  -1   0    0.51    0.16
   8  -1   1    0.07    0.13
   8  -1   1    0.25    0.14
   8  -1   2    0.11    0.14
   7  -1  -8    0.02    0.13
   7  -1  -8    0.24    0.15
   7  -1  -7    0.10    0.12
   7  -1  -7    0.34    0.15
   7  -1  -7    0.39    0.15
   7  -1  -6    0.13    0.11
   7  -1  -6    0.18    0.12
   7  -1  -6    0.04    0.12
   7  -1  -5    0.04    0.10
   7  -1  -5   -0.01    0.09
   7  -1  -5    0.15    0.12
   7  -1  -4    1.05    0.18
   7  -1  -4    1.00    0.19
   7  -1  -4    0.86    0.17
   7  -1  -3   -0.03    0.09
   7  -1  -3   -0.07    0.08
   7  -1  -3   -0.06    0.07
   7  -1  -2    0.32    0.12
   7  -1  -2    0.42    0.13
   7  -1  -2    0.39    0.13
   7  -1  -1   -0.01    0.08
   7  -1  -1    0.10    0.09
   7  -1  -1    0.01    0.08
   7  -1  -1    0.08    0.09
   7  -1  -1    0.01    0.08
   7  -1   0    0.62    0.14
   7  -1   0    0.33    0.13
   7  -1   0    0.35    0.13
   7  -1   1    0.00    0.06
   7  -1   1    0.00    0.09
   7  -1   1    0.21    0.12
   7  -1   2    0.32    0.15
   7  -1   2    0.02    0.11
   7  -1   3   -0.25    0.10
   6  -1  -8    1.10    0.21
   6  -1  -8    1.10    0.21
   6  -1  -8    0.77    0.20
   6  -1  -7   -0.04    0.11
   6  -1  -7   -0.11    0.10
   6  -1  -7    0.08    0.11
   6  -1  -6    0.03    0.10
   6  -1  -6    0.03    0.10
   6  -1  -6   -0.03    0.09
   6  -1  -5    1.04    0.18
   6  -1  -5    1.00    0.18
   6  -1  -5    0.84    0.16
   6  -1  -4    0.69    0.15
   6  -1  -4    0.98    0.17
   6  -1  -4    0.79    0.15
   6  -1  -3    0.23    0.12
   6  -1  -3    0.10    0.09
   6  -1  -3    0.20    0.10
   6  -1  -2   -0.04    0.08
   6  -1  -2   -0.03    0.08
   6  -1  -2    0.03    0.07
   6  -1  -2    0.04    0.08
   6  -1  -2   -0.12    0.06
   6  -1  -1    0.68    0.13
   6  -1  -1    0.55    0.12
   6  -1  -1    0.42    0.11
   6  -1  -1    0.39    0.11
   6  -1  -1    0.45    0.12
   6  -1   0    0.00    0.08
   6  -1   0    0.28    0.11
   6  -1   0    0.33    0.10
   6  -1   0    0.16    0.10
   6  -1   0    0.20    0.09
   6  -1   1    2.07    0.23
   6  -1   1    1.58    0.22
  -6   1  -2    3.35    0.26
   6  -1   2    3.19    0.26
   6  -1   2    3.29    0.28
   6  -1   3   -0.10    0.10
   6  -1   3    0.18    0.13
   6  -1   4    0.09    0.13
   5  -1  -8    6.74    0.44
   5  -1  -7    0.15    0.12
   5  -1  -7   -0.05    0.09
   5  -1  -7    0.20    0.12
   5  -1  -6    4.55    0.31
   5  -1  -6    4.79    0.30
   5  -1  -6    4.14    0.28
   5  -1  -5    1.68    0.21
   5  -1  -5    1.67    0.21
   5  -1  -5    1.49    0.20
   5  -1  -4   -0.02    0.08
   5  -1  -4   -0.03    0.07
   5  -1  -4    0.07    0.09
   5  -1  -3    2.78    0.21
   5  -1  -3    2.46    0.20
   5  -1  -3    2.71    0.21
   5  -1  -2    7.20    0.27
   5  -1  -2    7.56    0.33
   5  -1  -2    7.40    0.32
   5  -1  -2    7.16    0.33
   5  -1  -2    7.26    0.26
   5  -1  -1    1.45    0.15
   5  -1  -1    1.22    0.15
   5  -1  -1    1.51    0.17
   5  -1  -1    1.46    0.16
   5  -1  -1    1.44    0.15
   5  -1   0    0.09    0.08
   5  -1   0    0.24    0.08
   5  -1   0    0.29    0.09
   5  -1   0    0.25    0.09
   5  -1   0    0.10    0.09
   5  -1   1    3.25    0.24
   5  -1   1    3.45    0.26
  -5   1  -2    0.22    0.09
   5  -1   2    0.10    0.10
   5  -1   2    0.10    0.11
  -5   1  -3    4.60    0.30
   5  -1   3    5.14    0.33
   5  -1   3    4.86    0.33
  -5   1  -4    3.18    0.28
   5  -1   4    2.98    0.32
   5  -1   4    3.73    0.36
   5  -1   5    0.20    0.16
   4  -1  -8    0.09    0.14
   4  -1  -7    0.24    0.13
   4  -1  -6   15.83    0.56
   4  -1  -6   16.31    0.62
   4  -1  -6   16.80    0.56
   4  -1  -5    1.65    0.20
   4  -1  -5    1.22    0.17
   4  -1  -5    1.16    0.18
   4  -1  -4    3.91    0.24
   4  -1  -4    4.67    0.25
   4  -1  -4    4.19    0.25
   4  -1  -3    0.05    0.06
   4  -1  -3    0.06    0.03
   4  -1  -3    0.15    0.08
   4  -1  -3    0.12    0.07
   4  -1  -2   -0.04    0.05
   4  -1  -2    0.02    0.06
   4  -1  -2    0.08    0.06
   4  -1  -2   -0.09    0.03
   4  -1  -2    0.04    0.04
   4  -1  -1   18.53    0.52
   4  -1  -1   18.96    0.48
   4  -1  -1   17.28    0.52
   4  -1  -1   17.30    0.51
   4  -1  -1   18.42    0.49
   4  -1   0    8.18    0.30
   4  -1   0    7.98    0.29
   4  -1   0    8.29    0.29
   4  -1   0    8.10    0.31
   4  -1   1   22.05    0.56
   4  -1   1   22.36    0.65
   4  -1   1   21.85    0.63
   4  -1   1   22.11    0.57
  -4   1  -2    0.35    0.10
   4  -1   2    0.03    0.09
   4  -1   2    0.17    0.10
  -4   1  -3    1.34    0.18
   4  -1   3    1.37    0.19
   4  -1   3    1.25    0.19
  -4   1  -4    0.23    0.11
   4  -1   4    0.11    0.11
   4  -1   4    0.32    0.13
  -4   1  -5    3.75    0.30
   4  -1   5    4.10    0.33
   4  -1   5    4.57    0.34
   4  -1   6    0.55    0.19
   3  -1  -8    0.07    0.12
   3  -1  -7   11.34    0.53
   3  -1  -6    4.32    0.25
   3  -1  -6    4.08    0.29
   3  -1  -6    3.81    0.25
   3  -1  -5    6.69    0.31
   3  -1  -5    7.54    0.32
   3  -1  -5    6.41    0.34
   3  -1  -4   36.73    0.92
   3  -1  -4   36.18    0.76
   3  -1  -4   37.18    0.97
   3  -1  -4   37.41    0.93
   3  -1  -3    7.59    0.30
   3  -1  -3    7.88    0.30
   3  -1  -3    7.55    0.29
   3  -1  -2    9.68    0.32
   3  -1  -2    9.72    0.33
   3  -1  -2   10.02    0.25
   3  -1  -1    7.67    0.24
   3  -1  -1    8.07    0.27
   3  -1  -1    8.24    0.27
   3  -1  -1    8.00    0.24
   3  -1  -1    8.08    0.27
   3  -1   0    8.24    0.28
   3  -1   0    8.74    0.27
   3  -1   0    8.98    0.28
   3  -1   0    8.38    0.29
   3  -1   1    0.13    0.07
   3  -1   1    0.21    0.05
   3  -1   1    0.15    0.05
   3  -1   1    0.06    0.06
  -3   1  -2    0.72    0.11
   3  -1   2    0.86    0.07
   3  -1   2    0.90    0.14
   3  -1   2    0.86    0.14
  -3   1  -3    9.33    0.39
   3  -1   3    9.45    0.40
   3  -1   3   10.01    0.41
  -3   1  -4    0.57    0.13
   3  -1   4    0.58    0.14
   3  -1   4    0.37    0.13
  -3   1  -5    0.23    0.13
   3  -1   5    0.34    0.13
   3  -1   5    0.18    0.13
  -3   1  -6    0.54    0.17
   3  -1   6    0.58    0.18
   3  -1   6    0.88    0.19
   3  -1   7    1.19    0.24
   2  -1  -8    0.85    0.20
   2  -1  -7    2.12    0.27
   2  -1  -6    0.41    0.13
   2  -1  -5   15.61    0.47
   2  -1  -5   16.02    0.57
   2  -1  -5   16.22    0.48
   2  -1  -4   12.66    0.40
   2  -1  -4   13.19    0.34
   2  -1  -4   13.11    0.40
   2  -1  -4   12.51    0.44
   2  -1  -3   49.08    1.19
   2  -1  -3   50.85    1.15
   2  -1  -3   51.48    1.04
   2  -1  -3   50.49    1.13
   2  -1  -2  122.02    2.57
   2  -1  -2  118.98    2.52
   2  -1  -2  120.16    2.50
   2  -1  -1   30.19    0.71
   2  -1  -1   31.29    0.66
   2  -1  -1   31.13    0.72
   2  -1   0   18.74    0.46
   2  -1   0   19.06    0.45
   2  -1   0   18.68    0.45
   2  -1   1    0.29    0.07
   2  -1   1    0.43    0.07
   2  -1   1    0.44    0.05
  -2   1  -2   14.65    0.44
   2  -1   2   14.65    0.33
   2  -1   2   14.42    0.45
   2  -1   2   14.63    0.44
  -2   1  -3   -0.03    0.06
   2  -1   3   -0.01    0.07
   2  -1   3   -0.07    0.06
  -2   1  -4    0.00    0.09
   2  -1   4    0.14    0.10
   2  -1   4    0.01    0.08
  -2   1  -5    1.23    0.18
   2  -1   5    1.39    0.20
   2  -1   5    1.13    0.18
  -2   1  -6    0.97    0.20
   2  -1   6    1.05    0.19
   2  -1   6    0.93    0.18
  -2   1  -7    0.02    0.13
   2  -1   7   -0.13    0.11
   2  -1   7    0.05    0.13
   1  -1  -8    1.31    0.24
   1  -1  -7    3.41    0.30
   1  -1  -6   10.25    0.47
  -1   1   5    6.78    0.28
  -1   1   5    6.97    0.27
   1  -1  -5    6.64    0.34
  -1   1   4    2.61    0.15
  -1   1   4    2.72    0.15
   1  -1  -4    2.86    0.19
   1  -1  -4    2.34    0.14
   1  -1  -4    2.84    0.15
  -1   1   3    5.85    0.19
   1  -1  -3    5.79    0.24
   1  -1  -3    5.61    0.20
   1  -1  -3    6.04    0.20
  -1   1   2    3.96    0.13
   1  -1  -2    3.96    0.17
   1  -1  -2    3.79    0.15
   1  -1  -1   14.95    0.36
   1  -1  -1   14.65    0.35
   1  -1   0   32.73    0.64
   1  -1   0   26.12    0.62
  -1   1  -1    8.50    0.25
   1  -1   1    8.28    0.20
   1  -1   1    8.43    0.25
   1  -1   1    8.18    0.25
  -1   1  -2    0.81    0.10
   1  -1   2    0.79    0.04
   1  -1   2    0.67    0.09
   1  -1   2    0.63    0.09
  -1   1  -3   -0.09    0.04
   1  -1   3    0.03    0.06
   1  -1   3   -0.11    0.04
  -1   1  -4    3.05    0.22
   1  -1   4    3.44    0.21
   1  -1   4    3.26    0.22
  -1   1  -5    2.27    0.24
   1  -1   5    1.91    0.21
   1  -1   5    1.81    0.20
  -1   1  -6   -0.07    0.09
   1  -1   6    0.14    0.10
   1  -1   6    0.05    0.10
  -1   1  -7    1.63    0.24
   1  -1   7    1.71    0.24
   0  -1  -8   -0.08    0.11
   0  -1  -7    0.03    0.11
   0   1   6    1.39    0.18
   0   1   6    0.88    0.15
   0  -1  -6    1.34    0.21
   0   1   5    6.54    0.31
   0   1   5    6.76    0.30
   0  -1  -5    6.54    0.35
   0   1   4   10.57    0.35
   0   1   4   10.95    0.37
   0   1   4   10.65    0.28
   0  -1  -4   10.05    0.40
   0   1   3    6.09    0.23
   0   1   3    6.42    0.23
   0  -1  -3    6.00    0.26
   0   1   2   32.04    0.71
   0  -1  -2   32.07    0.66
   0  -1  -2   30.41    0.75
   0   1   1   59.02    1.20
   0  -1  -1   59.73    1.26
   0  -1  -1   58.04    1.19
   0   1   0    0.00    0.00
   0  -1   0    0.00    0.00
   0   1  -1   59.77    1.25
   0  -1   1   58.57    1.21
   0  -1   1   59.14    1.20
   0   1  -2   32.03    0.77
   0  -1   2   32.25    0.71
   0  -1   2   32.51    0.69
   0  -1   2   33.45    0.74
   0   1  -3    6.32    0.26
   0  -1   3    6.43    0.24
   0  -1   3    6.29    0.19
   0  -1   3    6.02    0.23
   0   1  -4   10.39    0.39
   0  -1   4   10.20    0.36
   0  -1   4   10.57    0.28
   0  -1   4   10.38    0.35
   0   1  -5    6.21    0.33
   0  -1   5    6.26    0.30
   0  -1   5    6.41    0.29
   0   1  -6    1.00    0.18
   0  -1   6    1.34    0.18
   0  -1   6    1.25    0.17
   0   1  -7    0.03    0.11
   0   1  -8    0.00    0.12
  -1  -1  -7    1.63    0.25
   1   1   6    0.12    0.10
   1   1   6    0.17    0.11
  -1  -1  -6   -0.09    0.09
   1   1   5    1.83    0.20
   1   1   5    1.85    0.21
  -1  -1  -5    1.87    0.22
   1   1   4    2.89    0.20
   1   1   4    3.30    0.21
  -1  -1  -4    3.30    0.23
   1   1   3    0.11    0.06
   1   1   3    0.05    0.06
  -1  -1  -3    0.00    0.05
   1   1   2    1.04    0.11
   1   1   2    0.75    0.09
  -1  -1  -2    0.70    0.09
   1   1   1    8.24    0.25
   1   1   1    8.37    0.25
  -1  -1  -1    8.33    0.26
   1   1   0   32.40    0.68
   1   1   0   32.57    0.71
   1   1  -1   14.80    0.32
   1   1  -1   14.83    0.35
   1   1  -2    4.32    0.18
   1   1  -2    4.08    0.16
   1   1  -2    4.30    0.14
   1   1  -3    6.18    0.25
   1   1  -3    5.93    0.21
   1   1  -3    6.13    0.21
  -1  -1   3    6.14    0.21
  -1  -1   3    5.89    0.20
   1   1  -4    2.38    0.14
   1   1  -4    2.58    0.18
  -1  -1   4    2.43    0.15
  -1  -1   4    2.61    0.16
  -1  -1   4    2.70    0.14
   1   1  -5    7.11    0.34
  -1  -1   5    7.07    0.29
  -1  -1   5    6.91    0.28
   1   1  -6   10.23    0.46
   1   1  -7    3.64    0.31
   1   1  -8    1.03    0.22
   2   1   7    0.09    0.13
   2   1   7    0.01    0.12
  -2  -1  -7    0.09    0.13
   2   1   6    0.78    0.17
   2   1   6    0.53    0.15
  -2  -1  -6    0.84    0.18
   2   1   5    1.05    0.17
   2   1   5    1.07    0.17
  -2  -1  -5    0.94    0.17
   2   1   4   -0.12    0.08
   2   1   4    0.08    0.08
  -2  -1  -4   -0.06    0.07
   2   1   3    0.03    0.07
   2   1   3    0.14    0.07
  -2  -1  -3    0.04    0.07
   2   1   2   14.77    0.43
   2   1   2   14.20    0.44
  -2  -1  -2   13.49    0.44
   2   1   1    0.38    0.07
   2   1   1    0.42    0.05
   2   1   1    0.37    0.07
   2   1   1    0.42    0.07
   2   1   0   18.06    0.47
   2   1   0   18.51    0.44
   2   1   0   18.48    0.46
   2   1   0   18.25    0.44
   2   1  -1   30.16    0.70
   2   1  -1   30.59    0.71
   2   1  -1   31.33    0.67
   2   1  -1   30.68    0.72
   2   1  -2  120.28    2.54
   2   1  -2  122.49    2.52
   2   1  -2  120.53    2.42
   2   1  -2  121.24    2.59
   2   1  -3   49.29    1.13
   2   1  -3   51.25    1.06
   2   1  -3   49.62    1.18
   2   1  -3   50.36    1.14
   2   1  -4   13.11    0.35
   2   1  -4   13.35    0.40
   2   1  -4   12.50    0.45
   2   1  -4   12.66    0.40
   2   1  -4   12.72    0.34
   2   1  -5   16.30    0.45
   2   1  -5   15.73    0.56
   2   1  -5   16.27    0.49
   2   1  -6    0.34    0.12
   2   1  -7    1.66    0.24
   2   1  -8    1.02    0.23
   3   1   7    0.76    0.20
   3   1   6    0.47    0.16
   3   1   6    0.80    0.18
  -3  -1  -6    0.79    0.19
   3   1   5    0.12    0.11
   3   1   5    0.17    0.11
  -3  -1  -5    0.34    0.13
   3   1   4    0.60    0.14
   3   1   4    0.56    0.14
  -3  -1  -4    0.62    0.14
   3   1   3    9.28    0.39
   3   1   3    9.57    0.40
  -3  -1  -3    9.11    0.39
   3   1   2    0.80    0.13
   3   1   2    0.65    0.11
  -3  -1  -2    0.64    0.11
   3   1   1    0.03    0.04
   3   1   1    0.08    0.06
   3   1   1    0.15    0.06
   3   1   1    0.06    0.06
   3   1   1    0.12    0.05
   3   1   0    7.99    0.28
   3   1   0    8.31    0.29
   3   1   0    8.10    0.26
   3   1   0    8.17    0.26
   3   1   0    8.73    0.28
   3   1  -1    8.26    0.25
   3   1  -1    7.63    0.24
   3   1  -1    8.25    0.28
   3   1  -1    7.87    0.27
   3   1  -1    7.81    0.28
   3   1  -2    9.49    0.32
   3   1  -2   10.04    0.33
   3   1  -2   10.12    0.26
   3   1  -2   10.15    0.33
   3   1  -3    7.90    0.21
   3   1  -3    7.60    0.30
   3   1  -3    7.90    0.30
   3   1  -3    7.58    0.29
   3   1  -4   37.14    0.93
   3   1  -4   36.83    0.79
   3   1  -4   36.49    0.92
   3   1  -4   35.94    0.97
   3   1  -5    7.62    0.36
   3   1  -5    7.40    0.33
   3   1  -5    7.48    0.32
   3   1  -6    3.96    0.28
   3   1  -6    4.21    0.25
   3   1  -7   10.02    0.49
   3   1  -8    0.08    0.12
   4   1   6    0.46    0.18
  -4  -1  -6    0.59    0.17
   4   1   5    3.84    0.32
   4   1   5    4.12    0.32
  -4  -1  -5    4.00    0.31
   4   1   4    0.13    0.11
   4   1   4    0.23    0.12
  -4  -1  -4    0.26    0.11
   4   1   3    1.67    0.21
   4   1   3    1.10    0.18
  -4  -1  -3    1.36    0.18
   4   1   2    0.26    0.10
   4   1   2    0.01    0.09
  -4  -1  -2    0.25    0.10
   4   1   1   21.18    0.62
   4   1   1   22.37    0.65
   4   1   1   22.06    0.55
   4   1   1   21.15    0.54
   4   1   1   21.19    0.64
   4   1   0    8.16    0.29
   4   1   0    7.76    0.32
   4   1   0    7.98    0.31
   4   1   0    7.87    0.28
   4   1   0    8.13    0.31
   4   1  -1   18.40    0.48
   4   1  -1   17.56    0.51
   4   1  -1   17.62    0.49
   4   1  -1   17.66    0.53
   4   1  -1   18.71    0.52
   4   1  -2   -0.02    0.05
   4   1  -2    0.01    0.05
   4   1  -2   -0.09    0.05
   4   1  -2    0.05    0.04
   4   1  -2   -0.01    0.04
   4   1  -3    0.09    0.07
   4   1  -3    0.04    0.04
   4   1  -3    0.20    0.08
   4   1  -3    0.06    0.06
   4   1  -4    4.13    0.25
   4   1  -4    4.33    0.25
   4   1  -4    3.82    0.24
   4   1  -5    1.46    0.19
   4   1  -5    1.16    0.16
   4   1  -5    1.38    0.18
   4   1  -6   16.61    0.56
   4   1  -6   16.02    0.62
   4   1  -6   16.68    0.58
   4   1  -7   -0.14    0.09
   4   1  -7    0.36    0.14
   4   1  -8    0.53    0.17
   5   1   5    0.26    0.15
   5   1   4    2.23    0.28
   5   1   4    2.67    0.30
  -5  -1  -4    3.25    0.32
   5   1   3    5.33    0.35
   5   1   3    5.20    0.33
  -5  -1  -3    5.05    0.32
   5   1   2   -0.09    0.07
   5   1   2    0.03    0.09
  -5  -1  -2    0.08    0.08
   5   1   1    2.59    0.22
   5   1   1    2.88    0.23
   5   1   1    3.25    0.23
   5   1   0    0.15    0.08
   5   1   0    0.25    0.10
   5   1   0    0.16    0.09
   5   1   0    0.12    0.07
   5   1   0   -0.02    0.07
   5   1  -1    1.60    0.16
   5   1  -1    1.16    0.15
   5   1  -1    1.54    0.16
   5   1  -1    1.49    0.16
   5   1  -1    1.38    0.15
   5   1  -2    6.98    0.32
   5   1  -2    7.04    0.32
   5   1  -2    6.97    0.32
   5   1  -2    6.86    0.27
   5   1  -2    7.08    0.26
   5   1  -3    2.61    0.20
   5   1  -3    3.07    0.21
   5   1  -3    2.48    0.21
   5   1  -3    2.64    0.14
   5   1  -4    0.12    0.09
   5   1  -4    0.14    0.09
   5   1  -4   -0.15    0.06
   5   1  -5    1.68    0.21
   5   1  -5    1.98    0.22
   5   1  -5    1.87    0.21
   5   1  -6    4.03    0.28
   5   1  -6    3.87    0.28
   5   1  -6    3.76    0.28
   5   1  -7    0.14    0.11
   5   1  -7    0.33    0.14
   5   1  -7    0.38    0.14
   5   1  -8    6.26    0.42
   6   1   4    0.12    0.15
   6   1   3   -0.02    0.10
   6   1   3   -0.07    0.10
  -6  -1  -3   -0.08    0.09
   6   1   2    3.35    0.28
   6   1   2    3.32    0.32
  -6  -1  -2    3.39    0.27
   6   1   1    1.74    0.22
   6   1   1    1.90    0.23
   6   1   1    1.38    0.20
   6   1   0    0.22    0.09
   6   1   0    0.13    0.09
   6   1   0    0.18    0.10
   6   1   0    0.24    0.11
   6   1   0    0.15    0.10
   6   1  -1    0.05    0.04
   6   1  -1    0.63    0.13
   6   1  -1    0.03    0.04
   6   1  -1    0.15    0.07
   6   1  -1    0.24    0.08
   6   1  -2   -0.05    0.08
   6   1  -2   -0.14    0.08
   6   1  -2   -0.02    0.07
   6   1  -2    0.23    0.10
   6   1  -2    0.03    0.07
   6   1  -3    0.09    0.09
   6   1  -3    0.28    0.10
   6   1  -3    0.16    0.10
   6   1  -4    0.42    0.13
   6   1  -4    0.96    0.17
   6   1  -4    0.99    0.17
   6   1  -5    0.90    0.17
   6   1  -5    0.93    0.17
   6   1  -5    0.86    0.17
   6   1  -6   -0.07    0.09
   6   1  -6    0.17    0.11
   6   1  -6   -0.04    0.08
   6   1  -7    0.17    0.12
   6   1  -7    0.03    0.10
   6   1  -7   -0.07    0.10
   6   1  -8    1.13    0.22
   6   1  -8    0.83    0.21
  -6  -1   8    1.10    0.21
   7   1   3    0.00    0.13
   7   1   2    0.22    0.14
   7   1   2    0.18    0.15
  -7  -1  -2    0.24    0.12
   7   1   1   -0.04    0.09
   7   1   1    0.02    0.11
   7   1   1    0.14    0.12
   7   1   0    0.45    0.14
   7   1   0    0.40    0.14
   7   1   0    0.47    0.13
   7   1  -1    0.20    0.10
   7   1  -1    0.11    0.10
   7   1  -1   -0.01    0.04
   7   1  -1    0.02    0.04
   7   1  -1    0.14    0.09
   7   1  -2    0.55    0.14
   7   1  -2    0.45    0.13
   7   1  -2    0.69    0.14
   7   1  -3   -0.17    0.07
   7   1  -3   -0.03    0.09
   7   1  -3   -0.03    0.08
   7   1  -4    1.07    0.19
   7   1  -4    1.29    0.19
   7   1  -4    1.13    0.19
   7   1  -5   -0.01    0.10
   7   1  -5    0.16    0.12
   7   1  -5    0.23    0.12
   7   1  -6    0.23    0.12
   7   1  -6    0.04    0.11
   7   1  -6   -0.04    0.11
   7   1  -7    0.23    0.14
   7   1  -7    0.06    0.11
   7   1  -7    0.16    0.12
   7   1  -8    0.00    0.12
   8   1   2    0.09    0.15
   8   1   1    0.07    0.12
   8   1   1    0.07    0.13
   8   1   0    0.87    0.19
   8   1   0    0.79    0.18
   8   1   0    1.12    0.20
   8   1  -1    0.38    0.14
   8   1  -1    0.06    0.06
   8   1  -1    0.06    0.06
   8   1  -2    0.02    0.09
   8   1  -2    0.04    0.10
   8   1  -2    0.06    0.11
   8   1  -3    0.02    0.10
   8   1  -3    0.01    0.10
   8   1  -3   -0.18    0.09
   8   1  -4    0.05    0.11
   8   1  -4    0.49    0.15
   8   1  -4    0.45    0.14
   8   1  -5    0.05    0.11
   8   1  -5    0.04    0.10
   8   1  -5    0.04    0.12
   8   1  -6    0.66    0.19
   8   1  -6    0.60    0.18
   8   1  -6    0.99    0.21
   8   1  -7   -0.07    0.11
   8   1  -7    0.05    0.12
   8   1  -8    0.15    0.14
   9   1   0    0.01    0.12
   9   1   0    0.13    0.14
   9   1  -1    0.04    0.13
   9   1  -2    0.31    0.14
   9   1  -2    0.15    0.13
   9   1  -3    1.43    0.24
   9   1  -3    1.19    0.21
   9   1  -3    1.58    0.25
   9   1  -4    0.15    0.13
   9   1  -4   -0.06    0.10
   9   1  -4   -0.07    0.10
   9   1  -5    0.00    0.12
   9   1  -5    0.12    0.14
   9   1  -5   -0.11    0.10
   9   1  -6    0.12    0.14
   9   1  -7   -0.05    0.13
  10   1  -3    0.03    0.12
  10   1  -4    0.01    0.13
  10   1  -5    0.98    0.23
  10  -2  -5   -0.14    0.12
  10  -2  -4    0.13    0.14
  10  -2  -3    0.14    0.14
   9  -2  -7    0.16    0.16
   9  -2  -6    0.06    0.13
   9  -2  -6    0.04    0.12
   9  -2  -5    0.01    0.12
   9  -2  -5    0.14    0.12
   9  -2  -5   -0.12    0.12
   9  -2  -4    0.58    0.16
   9  -2  -4    0.73    0.19
   9  -2  -4    0.64    0.19
   9  -2  -3   -0.01    0.12
   9  -2  -3    0.19    0.12
   9  -2  -3   -0.11    0.09
   9  -2  -2    0.43    0.15
   9  -2   0    0.02    0.13
   8  -2  -8    0.17    0.16
   8  -2  -7    0.20    0.15
   8  -2  -7    0.31    0.15
   8  -2  -7    0.12    0.12
   8  -2  -6    0.39    0.15
   8  -2  -6    0.43    0.16
   8  -2  -6    0.33    0.16
   8  -2  -5    0.23    0.13
   8  -2  -5    0.20    0.13
   8  -2  -5    0.20    0.13
   8  -2  -4    0.19    0.12
   8  -2  -4    0.41    0.14
   8  -2  -4    0.29    0.14
   8  -2  -3    1.56    0.23
   8  -2  -3    1.48    0.22
   8  -2  -3    1.77    0.25
   8  -2  -2    0.70    0.17
   8  -2  -2    0.31    0.13
   8  -2  -2    0.80    0.18
   8  -2  -1    0.03    0.07
   8  -2   0    0.06    0.11
   8  -2   0   -0.02    0.10
   8  -2   1   -0.05    0.12
   8  -2   1    0.07    0.12
   8  -2   2    0.09    0.14
   7  -2  -8    0.13    0.15
   7  -2  -8    0.17    0.14
   7  -2  -7    0.43    0.16
   7  -2  -7    0.05    0.11
   7  -2  -7    0.12    0.12
   7  -2  -6    0.05    0.11
   7  -2  -6   -0.03    0.09
   7  -2  -6   -0.09    0.11
   7  -2  -5    0.00    0.10
   7  -2  -5    0.40    0.14
   7  -2  -5    0.39    0.15
   7  -2  -4    0.06    0.09
   7  -2  -4    0.17    0.11
   7  -2  -4    0.05    0.10
   7  -2  -3    0.05    0.08
   7  -2  -3    0.06    0.09
   7  -2  -3    0.03    0.09
   7  -2  -2    0.26    0.12
   7  -2  -2    0.14    0.10
   7  -2  -2    0.12    0.09
   7  -2  -1    5.24    0.28
   7  -2  -1    3.94    0.27
   7  -2  -1    5.00    0.29
   7  -2   0   -0.05    0.09
   7  -2   0   -0.02    0.07
   7  -2   0    0.17    0.11
   7  -2   1    0.49    0.15
   7  -2   1    0.46    0.14
   7  -2   2    0.48    0.16
   7  -2   2    0.38    0.15
   7  -2   3    0.25    0.15
   6  -2  -8    0.12    0.13
   6  -2  -8   -0.12    0.11
   6  -2  -8    0.03    0.12
   6  -2  -7    0.03    0.10
   6  -2  -7   -0.09    0.10
   6  -2  -7    0.12    0.12
   6  -2  -6    0.09    0.11
   6  -2  -6    0.36    0.13
   6  -2  -6    0.24    0.12
   6  -2  -5    1.87    0.24
   6  -2  -5    2.02    0.23
   6  -2  -5    1.84    0.23
   6  -2  -4   -0.13    0.07
   6  -2  -4   -0.02    0.10
   6  -2  -4    0.03    0.08
   6  -2  -3    0.03    0.09
   6  -2  -3   -0.02    0.09
   6  -2  -3    0.01    0.08
   6  -2  -2    0.45    0.10
   6  -2  -2    0.40    0.10
   6  -2  -2    0.36    0.12
   6  -2  -2    0.36    0.11
   6  -2  -2    0.35    0.12
   6  -2  -1   -0.02    0.07
   6  -2  -1   -0.01    0.08
   6  -2  -1    0.13    0.09
   6  -2  -1    0.04    0.08
   6  -2  -1    0.02    0.08
   6  -2   0    0.52    0.12
   6  -2   0    0.94    0.16
   6  -2   0    0.60    0.12
   6  -2   0    0.74    0.13
   6  -2   0    1.09    0.16
   6  -2   1    4.83    0.29
   6  -2   1    4.33    0.31
   6  -2   1    4.36    0.29
  -6   2  -2    0.03    0.08
   6  -2   2    0.01    0.11
   6  -2   2    0.08    0.11
   6  -2   3    0.13    0.13
   6  -2   3    0.04    0.12
   6  -2   4    1.06    0.23
   5  -2  -8    2.83    0.33
   5  -2  -7    3.57    0.30
   5  -2  -7    4.00    0.29
   5  -2  -7    3.74    0.28
   5  -2  -6    0.00    0.10
   5  -2  -6    0.41    0.13
   5  -2  -6    0.09    0.10
   5  -2  -5    4.32    0.29
   5  -2  -5    3.58    0.26
   5  -2  -5    4.53    0.29
   5  -2  -4    1.66    0.19
   5  -2  -4    1.68    0.20
   5  -2  -4    1.42    0.19
   5  -2  -3    6.20    0.31
   5  -2  -3    5.72    0.30
   5  -2  -3    5.91    0.30
   5  -2  -2    2.26    0.14
   5  -2  -2    2.16    0.18
   5  -2  -2    2.00    0.17
   5  -2  -2    2.19    0.14
   5  -2  -2    1.78    0.19
   5  -2  -1    3.06    0.19
   5  -2  -1    3.56    0.22
   5  -2  -1    3.29    0.19
   5  -2  -1    3.23    0.20
   5  -2   0   -0.01    0.05
   5  -2   0    0.17    0.08
   5  -2   0    0.06    0.07
   5  -2   0    0.04    0.08
   5  -2   0    0.09    0.08
   5  -2   1    1.13    0.17
   5  -2   1    1.00    0.15
   5  -2   1    1.15    0.17
  -5   2  -2    1.50    0.18
   5  -2   2    1.35    0.20
   5  -2   2    1.22    0.19
  -5   2  -3    2.45    0.25
   5  -2   3    2.38    0.27
   5  -2   3    2.73    0.29
   5  -2   4    0.21    0.14
   5  -2   4    0.49    0.16
   5  -2   5   -0.01    0.13
   4  -2  -8    0.09    0.13
   4  -2  -7    1.54    0.23
   4  -2  -6   10.45    0.44
   4  -2  -6   11.40    0.45
   4  -2  -6   10.02    0.47
   4  -2  -5    2.41    0.23
   4  -2  -5    2.12    0.22
   4  -2  -4    0.76    0.14
   4  -2  -4    1.10    0.15
   4  -2  -4    0.98    0.14
   4  -2  -3    8.65    0.35
   4  -2  -3    9.69    0.36
   4  -2  -3    9.17    0.22
   4  -2  -3    8.64    0.35
   4  -2  -2    1.24    0.09
   4  -2  -2    1.41    0.14
   4  -2  -2    1.10    0.09
   4  -2  -2    1.23    0.14
   4  -2  -2    1.02    0.13
   4  -2  -1   -0.03    0.05
   4  -2  -1    0.02    0.03
   4  -2  -1   -0.01    0.05
   4  -2  -1   -0.05    0.05
   4  -2  -1    0.13    0.06
   4  -2   0    1.82    0.14
   4  -2   0    1.86    0.14
   4  -2   0    1.92    0.14
   4  -2   0    1.96    0.15
   4  -2   0    1.48    0.15
   4  -2   1    8.84    0.29
   4  -2   1    8.34    0.29
   4  -2   1    8.76    0.35
   4  -2   1    9.08    0.34
   4  -2   1    8.88    0.36
  -4   2  -2    0.41    0.11
   4  -2   2    0.58    0.13
   4  -2   2    0.28    0.11
  -4   2  -3    6.98    0.34
   4  -2   3    7.16    0.36
  -4   2  -4    0.62    0.14
   4  -2   4    0.53    0.15
   4  -2   4    0.58    0.16
   4  -2   5    1.35    0.23
   4  -2   5    1.70    0.25
   4  -2   6   -0.07    0.12
   3  -2  -8    0.20    0.14
   3  -2  -7    2.41    0.29
   3  -2  -6    0.13    0.10
   3  -2  -6    0.28    0.12
   3  -2  -6    0.26    0.10
   3  -2  -5   -0.01    0.08
   3  -2  -5   -0.12    0.07
   3  -2  -5   -0.10    0.07
   3  -2  -4   22.00    0.63
   3  -2  -4   22.41    0.66
   3  -2  -4   22.52    0.63
   3  -2  -3    9.85    0.34
   3  -2  -3   10.03    0.34
   3  -2  -3    9.49    0.35
   3  -2  -2    0.53    0.09
   3  -2  -2    0.59    0.05
   3  -2  -2    0.49    0.08
   3  -2  -2    0.43    0.08
   3  -2  -1    0.26    0.06
   3  -2  -1    0.28    0.06
   3  -2  -1    0.33    0.07
   3  -2  -1    0.25    0.06
   3  -2   0   25.97    0.65
   3  -2   0   26.53    0.63
   3  -2   0   26.13    0.66
   3  -2   0   25.70    0.63
   3  -2   0   26.68    0.64
   3  -2   1    4.44    0.21
   3  -2   1    4.92    0.18
   3  -2   1    4.53    0.22
   3  -2   1    4.89    0.18
   3  -2   1    4.81    0.23
  -3   2  -2    2.15    0.15
   3  -2   2    1.85    0.18
   3  -2   2    1.89    0.10
   3  -2   2    1.99    0.19
  -3   2  -3    0.23    0.10
   3  -2   3   -0.13    0.09
   3  -2   3    0.27    0.11
  -3   2  -4    2.93    0.23
   3  -2   4    2.67    0.27
   3  -2   4    3.18    0.25
  -3   2  -5    2.61    0.27
   3  -2   5    3.01    0.30
   3  -2   5    2.98    0.30
  -3   2  -6    1.01    0.20
   3  -2   6    1.11    0.21
   3  -2   6    0.88    0.20
   3  -2   7    0.25    0.16
   2  -2  -8    0.24    0.15
   2  -2  -7    1.04    0.20
   2  -2  -6    0.02    0.10
   2  -2  -5    4.69    0.23
   2  -2  -5    4.59    0.23
   2  -2  -5    4.88    0.29
   2  -2  -4   18.26    0.50
   2  -2  -4   16.70    0.55
   2  -2  -4   17.68    0.50
   2  -2  -3   12.43    0.37
   2  -2  -3   12.77    0.28
   2  -2  -3   12.29    0.40
   2  -2  -3   12.57    0.37
   2  -2  -2   83.25    1.80
   2  -2  -2   82.27    1.77
   2  -2  -1  235.79    4.85
   2  -2  -1  239.49    4.81
   2  -2  -1  239.32    4.78
   2  -2   0    2.46    0.12
   2  -2   0    1.93    0.11
   2  -2   0    2.33    0.12
   2  -2   0    2.50    0.11
   2  -2   1    6.65    0.25
   2  -2   1    6.84    0.20
   2  -2   1    6.86    0.25
  -2   2  -2   82.29    1.84
   2  -2   2   80.82    1.81
   2  -2   2   84.42    1.77
   2  -2   2   83.94    1.69
  -2   2  -3    0.28    0.08
   2  -2   3    0.41    0.10
   2  -2   3    0.54    0.11
  -2   2  -4    7.03    0.33
   2  -2   4    6.69    0.33
   2  -2   4    7.12    0.35
  -2   2  -5    0.18    0.11
   2  -2   5    0.00    0.08
   2  -2   5   -0.04    0.08
  -2   2  -6    0.61    0.17
   2  -2   6    0.26    0.13
   2  -2   6    0.28    0.13
  -2   2  -7    0.16    0.15
   2  -2   7    0.05    0.13
   2  -2   7    0.20    0.14
   1  -2  -8    1.28    0.25
   1  -2  -7   -0.08    0.10
   1  -2  -6    0.56    0.15
  -1   2   5    0.55    0.10
  -1   2   5    0.53    0.10
   1  -2  -5    0.44    0.12
  -1   2   4    1.22    0.12
  -1   2   4    1.04    0.11
   1  -2  -4    0.93    0.10
   1  -2  -4    0.78    0.13
   1  -2  -4    1.10    0.11
  -1   2   3    6.59    0.20
   1  -2  -3    6.40    0.21
   1  -2  -3    6.11    0.26
   1  -2  -3    6.42    0.21
  -1   2   2   48.96    0.99
   1  -2  -2   47.61    1.09
   1  -2  -2   47.52    1.03
  -1   2   1    0.11    0.01
   1  -2  -1    0.14    0.04
   1  -2  -1    0.09    0.03
  -1   2  -1   77.82    1.63
   1  -2   1   77.28    1.56
   1  -2   1   74.91    1.60
   1  -2   1   76.17    1.55
  -1   2  -2    1.35    0.11
   1  -2   2    1.29    0.11
   1  -2   2    1.05    0.11
   1  -2   2    1.34    0.07
  -1   2  -3   18.93    0.56
   1  -2   3   19.68    0.57
   1  -2   3   19.58    0.43
   1  -2   3   20.45    0.55
  -1   2  -4   31.68    0.88
   1  -2   4   31.86    0.86
   1  -2   4   32.58    0.84
  -1   2  -5    0.46    0.13
   1  -2   5    0.44    0.12
   1  -2   5    0.09    0.10
  -1   2  -6    2.36    0.26
   1  -2   6    3.03    0.28
   1  -2   6    2.52    0.26
  -1   2  -7    0.04    0.12
   1  -2   7   -0.07    0.11
   1  -2   7    0.01    0.12
   0  -2  -7    0.14    0.13
   0   2   6    5.49    0.29
   0   2   6    5.92    0.31
   0  -2  -6    6.37    0.37
   0   2   5    1.05    0.15
   0   2   5    0.94    0.14
   0  -2  -5    0.97    0.17
   0   2   4    0.12    0.07
   0   2   4    0.03    0.06
   0   2   4   -0.02    0.03
   0  -2  -4    0.08    0.08
   0   2   3    0.04    0.05
   0   2   3    0.09    0.05
   0  -2  -3    0.13    0.06
   0   2   2    1.60    0.10
   0  -2  -2    1.69    0.07
   0  -2  -2    1.46    0.11
   0   2   1   21.89    0.49
   0  -2  -1   22.15    0.52
   0  -2  -1   22.69    0.47
   0   2   0    0.15    0.01
   0   2   0    0.18    0.02
   0  -2   0    0.12    0.02
   0   2  -1   22.19    0.50
   0  -2   1   22.03    0.49
   0  -2   1   21.90    0.48
   0   2  -2    1.85    0.11
   0  -2   2    1.87    0.11
   0  -2   2    1.73    0.09
   0  -2   2    1.80    0.12
   0   2  -3    0.21    0.06
   0  -2   3    0.21    0.05
   0  -2   3    0.23    0.07
   0  -2   3    0.12    0.05
   0   2  -4    0.06    0.07
   0  -2   4    0.08    0.07
   0  -2   4    0.11    0.05
   0  -2   4    0.05    0.06
   0   2  -5    0.79    0.15
   0  -2   5    1.16    0.16
   0  -2   5    0.93    0.15
   0   2  -6    5.98    0.35
   0  -2   6    5.58    0.31
   0  -2   6    6.46    0.33
   0   2  -7    0.25    0.13
   0   2  -8    0.31    0.17
  -1  -2  -7    0.04    0.12
   1   2   6    2.46    0.25
   1   2   6    2.69    0.26
  -1  -2  -6    2.86    0.30
   1   2   5    0.44    0.12
   1   2   5    0.50    0.13
  -1  -2  -5    0.61    0.15
   1   2   4   29.96    0.81
   1   2   4   31.29    0.80
  -1  -2  -4   30.22    0.86
   1   2   3   19.37    0.54
   1   2   3   20.17    0.56
  -1  -2  -3   19.66    0.59
   1   2   2    1.11    0.11
   1   2   2    1.32    0.12
  -1  -2  -2    1.25    0.12
   1   2   1   75.18    1.58
   1   2   1   74.93    1.53
  -1  -2  -1   77.39    1.64
  -1  -2  -1   75.01    1.52
   1   2   0   82.69    1.69
   1   2   0   83.08    1.75
  -1  -2   0   83.86    1.69
   1   2  -1    0.09    0.03
   1   2  -1    0.13    0.03
   1   2  -1    0.05    0.03
   1   2  -2   51.06    1.08
   1   2  -2   51.63    1.15
   1   2  -3    6.76    0.22
   1   2  -3    6.05    0.25
   1   2  -3    6.34    0.22
  -1  -2   3    6.71    0.21
  -1  -2   3    6.55    0.22
   1   2  -4    1.41    0.13
   1   2  -4    1.09    0.14
  -1  -2   4    1.28    0.12
  -1  -2   4    1.30    0.11
   1   2  -5    0.53    0.13
   1   2  -5    0.61    0.11
  -1  -2   5    0.44    0.11
   1   2  -6    0.73    0.14
   1   2  -6    0.80    0.16
   1   2  -7    0.17    0.12
   1   2  -8    0.78    0.20
   2   2   7    0.03    0.12
   2   2   7    0.01    0.12
  -2  -2  -7    0.22    0.15
   2   2   6    0.41    0.15
   2   2   6    0.36    0.14
  -2  -2  -6    0.42    0.15
   2   2   5    0.23    0.10
   2   2   5    0.01    0.09
  -2  -2  -5    0.20    0.11
   2   2   4    7.10    0.33
   2   2   4    7.25    0.35
  -2  -2  -4    6.76    0.35
   2   2   3    0.46    0.10
   2   2   3    0.40    0.10
  -2  -2  -3    0.32    0.09
  -2  -2  -2   80.43    1.82
   2   2   1    6.40    0.24
   2   2   1    7.05    0.24
   2   2   1    6.55    0.24
   2   2   0    2.52    0.13
   2   2   0    2.33    0.13
   2   2   0    2.41    0.12
   2   2   0    2.47    0.13
   2   2  -1  233.46    4.77
   2   2  -1  235.57    4.91
   2   2  -1  239.45    4.71
   2   2  -1  238.05    4.82
   2   2  -2   81.80    1.74
   2   2  -2   81.83    1.76
   2   2  -2   82.54    1.67
   2   2  -3   12.82    0.38
   2   2  -3   11.90    0.36
   2   2  -3   12.54    0.32
   2   2  -3   12.11    0.39
   2   2  -4   18.46    0.45
   2   2  -4   17.24    0.50
   2   2  -4   17.74    0.56
   2   2  -4   18.44    0.46
   2   2  -4   17.43    0.50
   2   2  -5    4.86    0.29
   2   2  -5    4.79    0.21
   2   2  -5    4.39    0.23
   2   2  -5    4.66    0.21
  -2  -2   5    4.42    0.22
   2   2  -6    0.15    0.10
   2   2  -7    0.98    0.19
   2   2  -8    0.52    0.17
   3   2   7    0.21    0.15
   3   2   6    1.19    0.21
   3   2   6    0.81    0.19
  -3  -2  -6    1.20    0.22
   3   2   5    3.17    0.26
   3   2   5    2.67    0.28
  -3  -2  -5    2.67    0.28
   3   2   4    2.83    0.23
   3   2   4    2.55    0.26
  -3  -2  -4    2.90    0.24
   3   2   3    0.07    0.09
   3   2   3    0.15    0.10
  -3  -2  -3    0.15    0.09
   3   2   2    1.77    0.18
   3   2   2    1.98    0.19
  -3  -2  -2    2.02    0.16
   3   2   1    4.88    0.17
   3   2   1    4.49    0.22
   3   2   1    4.92    0.22
   3   2   1    4.30    0.22
   3   2   1    4.56    0.17
   3   2   0   26.77    0.65
   3   2   0   26.04    0.66
   3   2   0   26.79    0.63
   3   2   0   27.13    0.70
   3   2   0   26.25    0.64
   3   2  -1    0.27    0.07
   3   2  -1    0.32    0.06
   3   2  -1    0.35    0.07
   3   2  -1    0.35    0.08
   3   2  -1    0.27    0.06
   3   2  -2    0.63    0.07
   3   2  -2    0.61    0.09
   3   2  -2    0.66    0.09
   3   2  -2    0.61    0.09
   3   2  -3    9.83    0.34
   3   2  -3    9.41    0.35
   3   2  -3    9.51    0.26
   3   2  -3    9.50    0.33
   3   2  -4   22.12    0.66
   3   2  -4   21.89    0.52
   3   2  -4   23.38    0.63
   3   2  -4   20.31    0.61
   3   2  -5    0.02    0.08
   3   2  -5   -0.03    0.07
   3   2  -5    0.03    0.08
   3   2  -6    0.17    0.10
   3   2  -6    0.18    0.09
  -3  -2   6    0.18    0.10
   3   2  -7    2.09    0.26
   3   2  -8    0.37    0.16
   4   2   6    0.19    0.15
  -4  -2  -6    0.09    0.14
   4   2   5    1.46    0.23
   4   2   5    1.49    0.23
  -4  -2  -5    1.26    0.21
   4   2   4    0.52    0.15
   4   2   4    0.83    0.17
  -4  -2  -4    0.68    0.16
   4   2   3    6.70    0.35
   4   2   3    6.76    0.36
  -4  -2  -3    6.84    0.36
   4   2   2    0.54    0.13
   4   2   2    0.55    0.13
  -4  -2  -2    0.47    0.12
   4   2   1    8.74    0.28
   4   2   1    8.43    0.35
   4   2   1    8.71    0.28
   4   2   1    8.66    0.36
   4   2   1    9.43    0.37
   4   2   0    1.96    0.16
   4   2   0    1.86    0.13
   4   2   0    2.13    0.16
   4   2   0    1.89    0.17
   4   2   0    1.95    0.13
   4   2  -1   -0.01    0.05
   4   2  -1   -0.01    0.05
   4   2  -1   -0.02    0.05
   4   2  -1   -0.03    0.05
   4   2  -1   -0.09    0.05
   4   2  -2    1.11    0.13
   4   2  -2    1.23    0.10
   4   2  -2    1.24    0.14
   4   2  -2    1.36    0.11
   4   2  -2    1.35    0.15
   4   2  -3    8.99    0.35
   4   2  -3    8.26    0.34
   4   2  -3    8.51    0.26
   4   2  -3    9.11    0.25
   4   2  -4    0.91    0.14
   4   2  -4    0.74    0.13
   4   2  -4    1.24    0.15
   4   2  -5    2.32    0.20
   4   2  -5    2.05    0.22
   4   2  -5    2.52    0.25
   4   2  -6   10.07    0.43
   4   2  -6   10.76    0.44
   4   2  -6    9.94    0.46
   4   2  -7    1.02    0.19
   4   2  -7    1.23    0.17
  -4  -2   7    1.30    0.19
   4   2  -8    0.13    0.13
   5   2   5    0.27    0.15
  -5  -2  -5    0.06    0.11
   5   2   4    0.28    0.14
   5   2   4    0.39    0.15
  -5  -2  -4    0.32    0.13
   5   2   3    2.80    0.29
   5   2   3    2.39    0.28
  -5  -2  -3    2.56    0.27
   5   2   2    1.38    0.19
   5   2   2    1.43    0.20
  -5  -2  -2    1.18    0.17
   5   2   1    1.03    0.17
   5   2   1    0.70    0.15
   5   2   1    1.08    0.17
   5   2   0    0.03    0.08
   5   2   0    0.13    0.08
   5   2   0    0.11    0.07
   5   2   0   -0.01    0.07
   5   2   0    0.01    0.07
   5   2  -1    3.23    0.22
   5   2  -1    3.42    0.21
   5   2  -1    2.92    0.20
   5   2  -2    2.12    0.15
   5   2  -2    2.23    0.15
   5   2  -2    2.30    0.19
   5   2  -2    1.85    0.19
   5   2  -2    1.84    0.19
   5   2  -3    6.08    0.30
   5   2  -3    6.04    0.31
   5   2  -3    5.61    0.22
   5   2  -4    1.23    0.17
   5   2  -4    1.69    0.19
   5   2  -4    1.61    0.20
   5   2  -5    4.11    0.28
   5   2  -5    4.58    0.28
   5   2  -5    3.71    0.27
   5   2  -6    0.03    0.09
   5   2  -6    0.10    0.10
   5   2  -6    0.27    0.12
   5   2  -7    3.93    0.31
   5   2  -7    3.88    0.29
   5   2  -8    3.53    0.36
   6   2   4    0.84    0.20
  -6  -2  -4    0.89    0.20
   6   2   3    0.08    0.12
   6   2   3   -0.08    0.11
  -6  -2  -3    0.08    0.11
   6   2   2    0.09    0.10
   6   2   2   -0.04    0.10
  -6  -2  -2   -0.01    0.09
   6   2   1    3.77    0.27
   6   2   1    4.84    0.30
   6   2   1    4.27    0.30
   6   2   0    0.71    0.13
   6   2   0    0.90    0.16
   6   2   0    0.57    0.14
   6   2   0    1.01    0.14
   6   2   0    0.83    0.15
   6   2  -1   -0.01    0.03
   6   2  -1    0.02    0.04
   6   2  -1   -0.01    0.03
   6   2  -1    0.00    0.08
   6   2  -1    0.02    0.04
   6   2  -2    0.25    0.09
   6   2  -2    0.35    0.09
   6   2  -2    0.30    0.12
   6   2  -2    0.35    0.11
   6   2  -2    0.32    0.12
   6   2  -3   -0.07    0.09
   6   2  -3   -0.18    0.06
   6   2  -3    0.06    0.09
   6   2  -4   -0.02    0.08
   6   2  -4   -0.03    0.07
   6   2  -4    0.09    0.11
   6   2  -5    2.12    0.25
   6   2  -5    2.00    0.23
   6   2  -5    1.96    0.23
   6   2  -6    0.38    0.14
   6   2  -6    0.17    0.12
   6   2  -6    0.28    0.12
   6   2  -7   -0.01    0.10
   6   2  -7    0.02    0.11
   6   2  -7    0.02    0.11
   6   2  -8   -0.09    0.11
   6   2  -8    0.00    0.13
  -6  -2   8   -0.05    0.11
   7   2   3    0.10    0.14
   7   2   2    0.62    0.18
   7   2   2    0.45    0.16
  -7  -2  -2    0.79    0.18
   7   2   1    0.22    0.13
   7   2   1    0.38    0.14
   7   2   1    0.22    0.13
   7   2   0    0.02    0.09
   7   2   0   -0.02    0.10
   7   2   0    0.07    0.10
   7   2  -1    4.20    0.27
   7   2  -1    4.89    0.29
   7   2  -1    4.75    0.31
   7   2  -2    0.19    0.09
   7   2  -2    0.29    0.11
   7   2  -2    0.18    0.09
   7   2  -2    0.15    0.10
   7   2  -2    0.17    0.11
   7   2  -3    0.03    0.09
   7   2  -3    0.10    0.09
   7   2  -3    0.07    0.10
   7   2  -4    0.07    0.09
   7   2  -4    0.09    0.11
   7   2  -4   -0.03    0.09
   7   2  -5    0.42    0.15
   7   2  -5    0.45    0.14
   7   2  -5    0.30    0.12
   7   2  -6    0.13    0.12
   7   2  -6    0.32    0.13
   7   2  -6   -0.08    0.11
   7   2  -7    0.22    0.14
   7   2  -7    0.08    0.12
   7   2  -7    0.21    0.14
   7   2  -8   -0.02    0.13
  -7  -2   8    0.22    0.15
   8   2   2   -0.08    0.12
   8   2   1    0.01    0.13
   8   2   1   -0.14    0.11
   8   2   0    0.12    0.11
   8   2   0   -0.06    0.11
   8   2   0   -0.06    0.10
   8   2  -1    0.16    0.11
   8   2  -1    0.17    0.10
   8   2  -1    0.12    0.10
   8   2  -2    0.61    0.16
   8   2  -2    0.40    0.14
   8   2  -2    0.56    0.15
   8   2  -3    1.41    0.22
   8   2  -3    1.23    0.20
   8   2  -3    1.82    0.23
   8   2  -4    0.24    0.13
   8   2  -4    0.16    0.12
   8   2  -4    0.11    0.11
   8   2  -5    0.10    0.12
   8   2  -5    0.14    0.11
   8   2  -5    0.00    0.11
   8   2  -6    0.41    0.17
   8   2  -6    0.23    0.14
   8   2  -6    0.52    0.16
   8   2  -7   -0.05    0.13
   8   2  -7    0.24    0.15
   8   2  -8    0.05    0.15
   9   2   0    0.35    0.17
   9   2   0    0.14    0.14
   9   2  -1    0.09    0.12
   9   2  -2    0.39    0.14
   9   2  -2    0.24    0.14
   9   2  -3   -0.06    0.12
   9   2  -3   -0.11    0.11
   9   2  -3    0.08    0.11
   9   2  -4    0.53    0.18
   9   2  -4    0.48    0.17
   9   2  -4    0.41    0.17
   9   2  -5    0.19    0.15
   9   2  -5   -0.06    0.13
   9   2  -5    0.11    0.13
   9   2  -6    0.15    0.15
   9   2  -7    0.45    0.19
  10   2  -3   -0.13    0.10
  10   2  -4    0.31    0.16
  10   2  -5   -0.03    0.14
  10  -3  -5    0.17    0.15
  10  -3  -4   -0.06    0.13
  10  -3  -3    0.00    0.12
   9  -3  -7    0.29    0.17
   9  -3  -6    0.22    0.14
   9  -3  -6    0.46    0.18
   9  -3  -5    0.34    0.16
   9  -3  -5    0.22    0.14
   9  -3  -5    0.24    0.14
   9  -3  -4    0.12    0.12
   9  -3  -4    0.12    0.14
   9  -3  -4    0.14    0.14
   9  -3  -3    0.14    0.12
   9  -3  -3    0.18    0.14
   9  -3  -3    0.07    0.12
   9  -3  -2   -0.03    0.11
   9  -3  -2    0.03    0.11
   9  -3   0   -0.06    0.12
   8  -3  -8    0.06    0.15
   8  -3  -7   -0.07    0.10
   8  -3  -7    0.02    0.12
   8  -3  -6   -0.21    0.09
   8  -3  -6    0.07    0.11
   8  -3  -6   -0.07    0.10
   8  -3  -5    0.12    0.11
   8  -3  -5    0.04    0.12
   8  -3  -5    0.29    0.14
   8  -3  -4    0.71    0.16
   8  -3  -4    0.52    0.16
   8  -3  -4    0.84    0.18
   8  -3  -3    0.77    0.16
   8  -3  -3    0.82    0.18
   8  -3  -3    1.25    0.21
   8  -3  -2   -0.01    0.09
   8  -3  -2   -0.08    0.09
   8  -3  -2    0.11    0.09
   8  -3   0    0.13    0.12
   8  -3   0    0.08    0.11
   8  -3   1   -0.07    0.12
   8  -3   1    0.14    0.13
   8  -3   2    0.27    0.17
   7  -3  -8    0.10    0.14
   7  -3  -8    0.04    0.14
   7  -3  -7    0.01    0.12
   7  -3  -7   -0.01    0.10
   7  -3  -7   -0.07    0.09
   7  -3  -6    0.01    0.11
   7  -3  -6   -0.03    0.12
   7  -3  -6    0.02    0.10
   7  -3  -5    0.10    0.12
   7  -3  -5   -0.13    0.07
   7  -3  -5    0.15    0.12
   7  -3  -4    0.23    0.12
   7  -3  -4    0.15    0.12
   7  -3  -4    0.60    0.14
   7  -3  -3    0.48    0.12
   7  -3  -3    0.38    0.12
   7  -3  -3    0.59    0.15
   7  -3  -2    1.92    0.23
   7  -3  -2    2.18    0.23
   7  -3  -2    2.20    0.23
   7  -3  -1    1.43    0.19
   7  -3  -1    0.85    0.15
   7  -3  -1    0.87    0.15
   7  -3   0    1.06    0.19
   7  -3   0    0.91    0.17
   7  -3   0    0.90    0.17
   7  -3   1    0.18    0.12
   7  -3   1    0.20    0.12
   7  -3   2    0.07    0.13
   7  -3   2    0.00    0.12
   7  -3   3    0.49    0.18
   6  -3  -8    1.00    0.21
   6  -3  -8    0.94    0.21
   6  -3  -7    1.00    0.20
   6  -3  -7    0.97    0.19
   6  -3  -7    0.58    0.16
   6  -3  -6    0.38    0.14
   6  -3  -6    0.49    0.15
   6  -3  -6    0.32    0.12
   6  -3  -5    0.64    0.15
   6  -3  -5    0.45    0.13
   6  -3  -5    0.93    0.18
   6  -3  -4   -0.07    0.09
   6  -3  -4    0.03    0.08
   6  -3  -4    0.01    0.09
   6  -3  -3    0.36    0.11
   6  -3  -3    0.32    0.11
   6  -3  -3    0.28    0.12
   6  -3  -2    1.04    0.17
   6  -3  -2    1.19    0.16
   6  -3  -2    0.83    0.15
   6  -3  -2    0.96    0.13
   6  -3  -2    1.14    0.14
   6  -3  -1    1.48    0.18
   6  -3  -1    1.55    0.18
   6  -3  -1    1.62    0.19
   6  -3  -1    1.74    0.19
   6  -3  -1    1.51    0.17
   6  -3   0    2.75    0.20
   6  -3   0    2.52    0.20
   6  -3   0    3.12    0.23
   6  -3   0    2.64    0.21
   6  -3   0    2.88    0.23
   6  -3   1    1.31    0.18
   6  -3   1    1.16    0.18
   6  -3   1    1.42    0.20
   6  -3   2    0.60    0.16
   6  -3   2    0.40    0.14
   6  -3   3    0.06    0.13
   6  -3   3    0.13    0.12
   6  -3   4   -0.20    0.10
   5  -3  -8    0.01    0.13
   5  -3  -7    0.24    0.12
   5  -3  -7    0.16    0.12
   5  -3  -7    0.26    0.12
   5  -3  -6   -0.06    0.08
   5  -3  -6    0.04    0.10
   5  -3  -6    0.13    0.10
   5  -3  -5    1.33    0.19
   5  -3  -5    1.45    0.20
   5  -3  -5    1.26    0.19
   5  -3  -4    4.05    0.26
   5  -3  -4    3.76    0.26
   5  -3  -4    4.15    0.26
   5  -3  -3    3.97    0.26
   5  -3  -3    3.89    0.24
   5  -3  -3    4.11    0.25
   5  -3  -2    1.90    0.18
   5  -3  -2    1.69    0.13
   5  -3  -2    1.95    0.13
   5  -3  -2    1.89    0.19
   5  -3  -2    1.82    0.19
   5  -3  -1    3.59    0.22
   5  -3  -1    3.84    0.23
   5  -3  -1    4.35    0.21
   5  -3  -1    4.70    0.25
   5  -3  -1    3.79    0.21
   5  -3   0    0.24    0.09
   5  -3   0    0.11    0.08
   5  -3   0    0.09    0.07
   5  -3   0    0.00    0.07
   5  -3   0    0.09    0.08
   5  -3   1    0.89    0.15
   5  -3   1    0.38    0.13
   5  -3   1    0.52    0.13
  -5   3  -2    2.80    0.22
   5  -3   2    3.20    0.26
   5  -3   2    3.13    0.25
  -5   3  -3    1.88    0.22
   5  -3   3    1.85    0.24
   5  -3   3    2.22    0.27
   5  -3   4    0.04    0.12
   5  -3   4    0.22    0.14
   5  -3   5    0.07    0.14
   4  -3  -8    0.54    0.17
   4  -3  -7    0.16    0.12
   4  -3  -6    1.86    0.21
   4  -3  -6    1.84    0.22
   4  -3  -6    1.68    0.22
   4  -3  -5    1.08    0.18
   4  -3  -5    1.09    0.16
   4  -3  -5    1.05    0.16
   4  -3  -4    2.49    0.19
   4  -3  -4    2.57    0.20
   4  -3  -4    2.91    0.21
   4  -3  -3   18.30    0.55
   4  -3  -3   17.78    0.55
   4  -3  -2   20.30    0.48
   4  -3  -2   20.21    0.49
   4  -3  -2   20.79    0.59
   4  -3  -2   20.79    0.58
   4  -3  -2   20.02    0.58
   4  -3  -1   22.52    0.62
   4  -3  -1   22.82    0.58
   4  -3  -1   22.08    0.56
   4  -3  -1   23.15    0.62
   4  -3  -1   23.08    0.62
   4  -3   0    4.38    0.22
   4  -3   0    4.69    0.22
   4  -3   0    4.03    0.21
   4  -3   0    4.56    0.21
   4  -3   0    4.44    0.22
   4  -3   1    3.67    0.23
   4  -3   1    3.96    0.19
   4  -3   1    3.65    0.18
   4  -3   1    3.57    0.21
   4  -3   1    3.53    0.23
  -4   3  -2    2.21    0.17
   4  -3   2    1.99    0.21
   4  -3   2    1.92    0.20
  -4   3  -3    0.93    0.15
   4  -3   3    0.81    0.16
   4  -3   3    0.75    0.16
  -4   3  -4    2.49    0.25
   4  -3   4    2.27    0.26
   4  -3   4    2.35    0.27
   4  -3   5    0.39    0.16
   4  -3   5    0.32    0.15
   4  -3   6    0.43    0.17
   3  -3  -8    0.48    0.18
   3  -3  -7   -0.06    0.11
   3  -3  -6    1.16    0.16
   3  -3  -6    1.45    0.21
   3  -3  -6    1.05    0.16
   3  -3  -5    6.19    0.29
   3  -3  -5    5.78    0.28
   3  -3  -4   18.57    0.58
   3  -3  -4   18.73    0.56
   3  -3  -4   18.72    0.55
   3  -3  -3   30.10    0.79
   3  -3  -3   30.04    0.77
   3  -3  -3   30.55    0.77
   3  -3  -2   15.97    0.46
   3  -3  -2   14.96    0.45
   3  -3  -2   15.93    0.45
   3  -3  -2   16.05    0.36
   3  -3  -1  103.35    2.12
   3  -3  -1  103.37    2.05
   3  -3  -1  102.96    2.20
   3  -3  -1  102.65    2.18
   3  -3  -1  102.88    2.21
   3  -3   0    3.10    0.15
   3  -3   0    2.93    0.16
   3  -3   0    3.15    0.15
   3  -3   0    2.98    0.15
   3  -3   0    3.05    0.16
   3  -3   1   53.78    1.22
   3  -3   1   53.56    1.25
   3  -3   1   55.18    1.20
   3  -3   1   53.63    1.25
   3  -3   1   55.53    1.19
  -3   3  -2    5.16    0.25
   3  -3   2    5.85    0.29
   3  -3   2    5.43    0.27
   3  -3   2    5.80    0.19
  -3   3  -3    0.99    0.14
   3  -3   3    0.85    0.16
   3  -3   3    0.92    0.16
  -3   3  -4    1.45    0.18
   3  -3   4    1.32    0.19
   3  -3   4    1.46    0.20
  -3   3  -5    1.15    0.19
   3  -3   5    1.16    0.21
   3  -3   5    1.49    0.22
   3  -3   6    1.04    0.20
   3  -3   6    1.04    0.21
   3  -3   7    0.04    0.14
   2  -3  -8   -0.08    0.11
   2  -3  -7    1.82    0.25
   2  -3  -6    1.94    0.23
   2  -3  -5    0.60    0.11
   2  -3  -5    0.50    0.10
   2  -3  -5    0.34    0.12
  -2   3   4    1.45    0.09
   2  -3  -4    1.45    0.16
   2  -3  -4    1.53    0.14
   2  -3  -4    1.14    0.13
   2  -3  -3   22.13    0.60
   2  -3  -3   21.73    0.57
   2  -3  -3   22.14    0.57
   2  -3  -2    3.74    0.17
   2  -3  -2    3.41    0.16
   2  -3  -2    3.91    0.17
   2  -3  -1  213.55    4.37
   2  -3  -1  214.72    4.40
   2  -3  -1  212.76    4.45
   2  -3  -1  220.11    4.37
  -2   3  -1   33.84    0.78
   2  -3   1   32.81    0.78
   2  -3   1   32.79    0.80
   2  -3   1   34.95    0.75
  -2   3  -2    0.63    0.09
   2  -3   2    0.50    0.09
   2  -3   2    0.54    0.10
   2  -3   2    0.60    0.06
  -2   3  -3   17.96    0.55
   2  -3   3   18.19    0.56
   2  -3   3   18.45    0.58
  -2   3  -4    4.96    0.28
   2  -3   4    4.95    0.29
   2  -3   4    4.48    0.28
  -2   3  -5    1.50    0.20
   2  -3   5    1.59    0.21
   2  -3   5    1.19    0.19
  -2   3  -6    1.88    0.24
   2  -3   6    1.85    0.24
   2  -3   6    1.33    0.21
   2  -3   7    0.17    0.15
   2  -3   7    0.00    0.12
   1  -3  -8    0.39    0.17
   1  -3  -7   -0.07    0.10
   1  -3  -6    6.97    0.38
  -1   3   5    5.13    0.23
  -1   3   5    5.56    0.25
   1  -3  -5    4.96    0.30
  -1   3   4    8.98    0.28
  -1   3   4    8.87    0.29
   1  -3  -4    9.23    0.29
   1  -3  -4    8.78    0.36
   1  -3  -4    9.12    0.29
  -1   3   3   18.28    0.44
   1  -3  -3   18.21    0.46
   1  -3  -3   17.71    0.45
   1  -3  -3   18.26    0.52
  -1   3   2    3.47    0.11
   1  -3  -2    3.62    0.17
   1  -3  -2    3.47    0.14
  -1   3   1    3.09    0.09
   1  -3  -1    2.82    0.12
   1  -3   0    2.44    0.07
   1  -3   0    2.67    0.10
   1  -3   0    2.02    0.09
  -1   3  -1   47.20    1.01
   1  -3   1   45.50    1.01
   1  -3   1   46.49    0.98
   1  -3   1   46.85    0.98
  -1   3  -2    3.64    0.16
   1  -3   2    3.65    0.12
   1  -3   2    3.29    0.18
   1  -3   2    3.38    0.17
  -1   3  -3    6.32    0.26
   1  -3   3    6.61    0.27
   1  -3   3    6.46    0.19
   1  -3   3    6.03    0.27
  -1   3  -4    1.74    0.18
   1  -3   4    1.88    0.20
   1  -3   4    1.90    0.19
  -1   3  -5    0.53    0.13
   1  -3   5    0.74    0.14
   1  -3   5    0.50    0.13
  -1   3  -6    2.04    0.24
   1  -3   6    2.04    0.24
   1  -3   6    2.01    0.24
  -1   3  -7    2.15    0.28
   1  -3   7    2.28    0.26
   0  -3  -7    0.12    0.12
   0   3   6    1.33    0.18
   0   3   6    1.56    0.18
   0  -3  -6    1.31    0.21
   0   3   5    0.86    0.13
   0   3   5    0.58    0.12
   0  -3  -5    0.38    0.13
   0   3   4    2.54    0.16
   0   3   4    2.51    0.17
   0  -3  -4    2.93    0.11
   0  -3  -4    2.51    0.21
   0   3   3    5.65    0.21
   0   3   3    5.89    0.22
   0  -3  -3    5.50    0.25
   0  -3  -3    5.42    0.17
   0   3   2   96.93    1.95
   0   3   2   96.65    2.01
   0  -3  -2   99.67    1.98
   0  -3  -2   98.24    2.12
   0   3   1   12.17    0.29
   0  -3  -1   11.67    0.28
   0  -3  -1   12.33    0.32
   0   3   0    0.00    0.02
   0   3   0   -0.02    0.01
   0  -3   0   -0.01    0.02
   0   3  -1   12.09    0.29
   0   3  -1   12.18    0.30
   0  -3   1   11.89    0.29
   0   3  -2  100.77    2.16
   0  -3   2  101.17    2.07
   0  -3   2  103.05    2.04
   0  -3   2  100.15    2.10
   0   3  -3    5.87    0.24
   0  -3   3    5.88    0.24
   0  -3   3    5.96    0.23
   0  -3   3    5.69    0.19
   0   3  -4    2.46    0.18
   0  -3   4    2.72    0.18
   0  -3   4    2.19    0.18
   0  -3   4    2.64    0.13
   0  -3   4    2.55    0.13
   0   3  -5    0.92    0.16
   0  -3   5    0.84    0.15
   0  -3   5    0.83    0.14
   0   3  -6    1.47    0.21
   0  -3   6    1.55    0.20
   0   3  -7    0.18    0.13
   0   3  -8    0.09    0.14
  -1  -3  -7    2.20    0.29
   1   3   6    1.90    0.22
   1   3   6    1.51    0.20
  -1  -3  -6    1.83    0.25
   1   3   5    0.66    0.13
   1   3   5    0.60    0.13
  -1  -3  -5    0.68    0.15
   1   3   4    1.99    0.19
   1   3   4    1.73    0.18
  -1  -3  -4    2.23    0.22
   1   3   3    6.17    0.26
   1   3   3    6.95    0.27
  -1  -3  -3    6.01    0.28
   1   3   2    3.44    0.16
   1   3   2    3.29    0.17
  -1  -3  -2    3.45    0.18
   1   3   1   47.08    1.01
   1   3   1   45.25    0.97
  -1  -3  -1   46.65    1.05
  -1  -3  -1   45.86    0.95
   1   3   0    2.28    0.10
   1   3   0    2.40    0.10
  -1  -3   0    2.26    0.09
   1   3  -1    2.99    0.12
  -1  -3   1    2.97    0.12
   1   3  -2    3.62    0.16
   1   3  -2    3.41    0.15
   1   3  -2    3.61    0.14
   1   3  -3   18.10    0.46
   1   3  -3   17.90    0.51
  -1  -3   3   17.78    0.46
  -1  -3   3   17.93    0.45
   1   3  -4    9.14    0.31
   1   3  -4    8.87    0.35
  -1  -3   4    8.93    0.29
  -1  -3   4    9.21    0.30
  -1  -3   4    9.17    0.30
   1   3  -5    5.55    0.26
   1   3  -5    5.59    0.30
  -1  -3   5    5.52    0.23
  -1  -3   5    5.75    0.26
   1   3  -6    6.69    0.32
   1   3  -6    6.82    0.37
  -1  -3   6    6.26    0.30
   1   3  -7    0.06    0.11
   1   3  -8    0.06    0.13
   2   3   7   -0.03    0.12
   2   3   7    0.10    0.13
  -2  -3  -7    0.06    0.14
   2   3   6    1.79    0.24
   2   3   6    2.01    0.24
  -2  -3  -6    1.48    0.23
   2   3   5    1.43    0.19
   2   3   5    1.14    0.18
  -2  -3  -5    1.17    0.19
   2   3   4    4.61    0.27
   2   3   4    4.05    0.25
  -2  -3  -4    4.50    0.28
   2   3   3   17.53    0.55
   2   3   3   17.63    0.54
  -2  -3  -3   17.43    0.56
   2   3   2    0.59    0.10
   2   3   2    0.46    0.09
  -2  -3  -2    0.38    0.09
   2   3   1   33.13    0.82
   2   3   1   33.92    0.77
   2   3   1   31.93    0.79
  -2  -3  -1   33.61    0.71
   2   3   0   25.79    0.59
   2   3   0   26.34    0.59
   2   3   0   25.08    0.63
   2   3   0   25.88    0.61
   2   3  -1  209.36    4.20
   2   3  -1  215.53    4.30
   2   3  -1  205.07    4.25
   2   3  -1  210.51    4.38
   2   3  -2    3.58    0.17
   2   3  -2    3.92    0.14
   2   3  -2    3.92    0.17
   2   3  -2    3.70    0.17
   2   3  -3   22.37    0.62
   2   3  -3   22.70    0.59
   2   3  -3   23.38    0.54
   2   3  -3   21.72    0.58
   2   3  -3   22.79    0.52
   2   3  -4    1.20    0.15
   2   3  -4    1.58    0.14
   2   3  -4    1.43    0.11
   2   3  -4    1.42    0.11
  -2  -3   4    1.50    0.14
   2   3  -5    0.59    0.10
   2   3  -5    0.40    0.10
   2   3  -5    0.45    0.12
   2   3  -5    0.49    0.09
  -2  -3   5    0.44    0.10
   2   3  -6    1.53    0.21
   2   3  -7    2.01    0.26
   2   3  -8   -0.02    0.12
   3   3   7    0.10    0.14
   3   3   6    1.08    0.21
   3   3   6    1.09    0.21
  -3  -3  -6    0.71    0.19
   3   3   5    1.01    0.18
   3   3   5    1.34    0.21
  -3  -3  -5    1.10    0.19
   3   3   4    1.35    0.19
   3   3   4    1.11    0.18
  -3  -3  -4    1.21    0.18
   3   3   3    0.93    0.15
   3   3   3    0.83    0.14
  -3  -3  -3    0.72    0.14
   3   3   2    5.52    0.28
   3   3   2    5.51    0.27
  -3  -3  -2    5.27    0.27
   3   3   1   52.29    1.24
   3   3   1   52.34    1.12
   3   3   1   50.26    1.20
   3   3   0    2.77    0.14
   3   3   0    2.52    0.15
   3   3   0    2.87    0.15
   3   3   0    2.79    0.14
   3   3  -1   99.52    2.15
   3   3  -1   96.54    1.98
   3   3  -1  102.19    2.10
   3   3  -1   97.47    2.07
   3   3  -1   94.70    2.04
   3   3  -2   15.99    0.39
   3   3  -2   15.80    0.40
   3   3  -2   15.37    0.47
   3   3  -2   16.01    0.46
   3   3  -2   15.90    0.46
   3   3  -3   30.53    0.77
   3   3  -3   30.70    0.67
   3   3  -3   29.38    0.76
   3   3  -3   28.60    0.78
   3   3  -4   19.16    0.57
   3   3  -4   18.95    0.46
   3   3  -4   18.65    0.56
   3   3  -4   19.38    0.60
   3   3  -4   19.22    0.47
   3   3  -5    5.33    0.31
   3   3  -5    5.56    0.28
   3   3  -6    0.91    0.17
   3   3  -6    1.15    0.16
  -3  -3   6    0.93    0.15
   3   3  -7    0.13    0.12
   3   3  -8    0.34    0.16
   4   3   6    0.35    0.16
   4   3   5    0.31    0.14
   4   3   5    0.51    0.15
  -4  -3  -5    0.29    0.14
   4   3   4    2.41    0.27
   4   3   4    2.64    0.28
  -4  -3  -4    2.18    0.25
   4   3   3    1.08    0.18
   4   3   3    0.92    0.16
  -4  -3  -3    1.14    0.17
   4   3   2    2.80    0.22
   4   3   2    1.98    0.20
  -4  -3  -2    1.93    0.20
   4   3   1    3.45    0.16
   4   3   1    3.08    0.21
   4   3   1    3.40    0.22
   4   3   1    3.45    0.21
   4   3   0    4.53    0.20
   4   3   0    4.52    0.20
   4   3   0    4.00    0.22
   4   3   0    4.75    0.25
   4   3   0    4.21    0.22
   4   3  -1   22.62    0.60
   4   3  -1   22.52    0.61
   4   3  -1   21.64    0.63
   4   3  -2   19.69    0.49
   4   3  -2   19.88    0.56
   4   3  -2   19.15    0.58
   4   3  -2   19.57    0.51
   4   3  -2   20.02    0.57
   4   3  -3   19.09    0.47
   4   3  -3   18.99    0.46
   4   3  -3   19.11    0.57
   4   3  -3   19.02    0.57
   4   3  -3   18.76    0.58
   4   3  -4    2.52    0.20
   4   3  -4    2.57    0.20
   4   3  -4    2.41    0.19
   4   3  -5    1.34    0.18
   4   3  -5    1.18    0.16
   4   3  -5    1.01    0.17
   4   3  -6    1.77    0.22
   4   3  -6    1.53    0.20
  -4  -3   6    2.23    0.22
   4   3  -7    0.15    0.08
   4   3  -7    0.19    0.12
  -4  -3   7    0.18    0.11
   4   3  -8    0.32    0.15
   5   3   5    0.12    0.14
  -5  -3  -5    0.17    0.14
   5   3   4    0.22    0.13
   5   3   4    0.04    0.10
  -5  -3  -4    0.35    0.13
   5   3   3    1.54    0.22
   5   3   3    1.92    0.24
  -5  -3  -3    1.58    0.21
   5   3   2    2.97    0.28
   5   3   2    2.87    0.27
  -5  -3  -2    2.79    0.23
   5   3   1    0.46    0.13
   5   3   1    0.82    0.15
   5   3   1    0.68    0.15
   5   3   0    0.14    0.10
   5   3   0    0.14    0.09
   5   3   0    0.02    0.07
   5   3   0   -0.01    0.07
   5   3   0    0.07    0.07
   5   3  -1    4.33    0.23
   5   3  -1    3.93    0.22
   5   3  -1    3.82    0.24
   5   3  -2    1.65    0.14
   5   3  -2    2.03    0.15
   5   3  -2    1.65    0.18
   5   3  -2    1.91    0.19
   5   3  -2    1.86    0.19
   5   3  -3    4.54    0.19
   5   3  -3    4.41    0.26
   5   3  -3    4.27    0.26
   5   3  -3    4.24    0.26
   5   3  -3    4.33    0.19
   5   3  -4    3.79    0.25
   5   3  -4    4.02    0.26
   5   3  -4    3.93    0.25
   5   3  -5    1.23    0.18
   5   3  -5    1.31    0.19
   5   3  -5    1.20    0.18
   5   3  -6    0.04    0.10
   5   3  -6    0.18    0.11
   5   3  -6   -0.05    0.07
   5   3  -7    0.33    0.13
   5   3  -7    0.52    0.15
  -5  -3   7    0.39    0.14
   5   3  -8   -0.14    0.11
   6   3   4   -0.07    0.12
  -6  -3  -4    0.03    0.12
   6   3   3    0.04    0.12
   6   3   3    0.02    0.11
  -6  -3  -3    0.03    0.11
   6   3   2    0.36    0.14
   6   3   2    0.62    0.16
  -6  -3  -2    0.44    0.14
   6   3   1    1.49    0.21
   6   3   1    1.45    0.20
   6   3   1    1.09    0.18
   6   3   0    2.51    0.22
   6   3   0    2.67    0.20
   6   3   0    2.50    0.19
   6   3   0    2.76    0.22
   6   3   0    2.91    0.23
   6   3  -1    1.57    0.18
   6   3  -1    1.07    0.15
   6   3  -1    1.45    0.19
   6   3  -2    0.80    0.13
   6   3  -2    0.73    0.15
   6   3  -2    0.94    0.13
   6   3  -2    1.11    0.16
   6   3  -2    0.80    0.15
   6   3  -3    0.09    0.09
   6   3  -3    0.16    0.11
   6   3  -3    0.54    0.14
   6   3  -4    0.11    0.09
   6   3  -4   -0.07    0.07
   6   3  -4    0.15    0.10
   6   3  -5    0.55    0.14
   6   3  -5    0.53    0.15
   6   3  -5    0.54    0.14
   6   3  -6    0.59    0.15
   6   3  -6    0.11    0.11
   6   3  -6    0.32    0.14
   6   3  -7    0.48    0.16
   6   3  -7    0.59    0.17
   6   3  -8    0.88    0.20
   6   3  -8    1.21    0.23
  -6  -3   8    1.19    0.22
   7   3   3    1.12    0.23
  -7  -3  -3    0.42    0.16
   7   3   2   -0.14    0.09
   7   3   2    0.08    0.12
  -7  -3  -2    0.13    0.11
   7   3   1    0.36    0.15
   7   3   1    0.26    0.13
   7   3   1    0.27    0.13
   7   3   0    0.83    0.16
   7   3   0    0.99    0.18
   7   3   0    0.75    0.16
   7   3  -1    0.93    0.16
   7   3  -1    0.91    0.16
   7   3  -1    1.02    0.17
   7   3  -1    1.22    0.19
   7   3  -1    1.00    0.16
   7   3  -2    2.10    0.24
   7   3  -2    2.24    0.23
   7   3  -2    1.85    0.20
   7   3  -2    2.29    0.24
   7   3  -2    2.09    0.21
   7   3  -3    0.34    0.12
   7   3  -3    0.37    0.13
   7   3  -3    0.42    0.12
   7   3  -4    0.42    0.13
   7   3  -4    0.43    0.14
   7   3  -4    0.45    0.14
   7   3  -5   -0.01    0.09
   7   3  -5   -0.03    0.09
   7   3  -5    0.00    0.10
   7   3  -6    0.12    0.12
   7   3  -6    0.20    0.12
   7   3  -6    0.25    0.13
   7   3  -7    0.04    0.12
   7   3  -7    0.03    0.11
   7   3  -8   -0.14    0.12
  -7  -3   8    0.12    0.13
   8   3   2    0.04    0.13
   8   3   1    0.08    0.12
   8   3   1    0.12    0.13
   8   3   0    0.21    0.13
   8   3   0    0.01    0.11
   8   3   0    0.13    0.13
   8   3  -1   -0.04    0.10
   8   3  -1    0.31    0.13
   8   3  -1   -0.08    0.09
   8   3  -2   -0.01    0.10
   8   3  -2    0.04    0.11
   8   3  -2    0.03    0.10
   8   3  -3    1.09    0.20
   8   3  -3    1.02    0.19
   8   3  -3    0.73    0.17
   8   3  -4    1.27    0.22
   8   3  -4    0.94    0.20
   8   3  -4    1.18    0.20
   8   3  -5    0.23    0.13
   8   3  -5   -0.01    0.11
   8   3  -5    0.14    0.12
   8   3  -6    0.08    0.14
   8   3  -6    0.16    0.13
   8   3  -6    0.03    0.11
   8   3  -7    0.10    0.14
   8   3  -8   -0.09    0.13
   9   3   0    0.14    0.14
   9   3   0   -0.02    0.13
   9   3  -1   -0.12    0.10
   9   3  -2    0.04    0.12
   9   3  -2   -0.02    0.10
   9   3  -3    0.18    0.13
   9   3  -3    0.01    0.11
   9   3  -3    0.13    0.12
   9   3  -4   -0.08    0.11
   9   3  -4   -0.01    0.12
   9   3  -4   -0.04    0.11
   9   3  -5    0.49    0.16
   9   3  -5    0.33    0.15
   9   3  -5    0.22    0.15
   9   3  -6    0.13    0.15
   9   3  -7    0.41    0.19
  10   3  -3    0.01    0.13
  10   3  -4   -0.04    0.13
  10   3  -5    0.29    0.17
  10  -4  -4    0.07    0.14
  10  -4  -3    0.10    0.14
   9  -4  -7    0.03    0.15
   9  -4  -6    0.12    0.14
   9  -4  -6   -0.03    0.11
   9  -4  -5   -0.12    0.10
   9  -4  -5   -0.04    0.12
   9  -4  -5    0.04    0.12
   9  -4  -4   -0.12    0.12
   9  -4  -4    0.13    0.13
   9  -4  -4    0.14    0.11
   9  -4  -3    0.14    0.13
   9  -4  -3    0.07    0.12
   9  -4  -2    0.04    0.11
   9  -4  -2   -0.04    0.11
   8  -4  -8    0.13    0.15
   8  -4  -7    0.13    0.14
   8  -4  -7   -0.08    0.11
   8  -4  -6   -0.07    0.11
   8  -4  -6   -0.16    0.09
   8  -4  -6   -0.06    0.09
   8  -4  -5    0.13    0.12
   8  -4  -5    0.44    0.15
   8  -4  -5    0.46    0.17
   8  -4  -4    0.82    0.18
   8  -4  -4    0.39    0.14
   8  -4  -4    0.68    0.16
   8  -4  -3    0.34    0.14
   8  -4  -3    0.71    0.16
   8  -4  -3    0.53    0.15
   8  -4  -2    0.08    0.10
   8  -4  -2    0.43    0.14
   8  -4  -2    0.31    0.13
   8  -4   0    0.00    0.12
   8  -4   0    0.07    0.11
   8  -4   1    0.14    0.13
   8  -4   1   -0.03    0.13
   8  -4   2    0.31    0.16
   7  -4  -8   -0.07    0.12
   7  -4  -8   -0.11    0.13
   7  -4  -7    0.11    0.12
   7  -4  -7   -0.04    0.11
   7  -4  -7   -0.04    0.11
   7  -4  -6    0.56    0.17
   7  -4  -6    0.63    0.16
   7  -4  -6    0.74    0.19
   7  -4  -5    0.31    0.13
   7  -4  -5    0.18    0.11
   7  -4  -5    0.32    0.14
   7  -4  -4    0.89    0.18
   7  -4  -4    1.03    0.17
   7  -4  -4    0.92    0.19
   7  -4  -3    0.36    0.13
   7  -4  -3    0.23    0.11
   7  -4  -3    0.08    0.10
   7  -4  -2    1.03    0.18
   7  -4  -2    0.88    0.16
   7  -4  -1    2.79    0.23
   7  -4  -1    2.18    0.22
   7  -4  -1    1.81    0.20
   7  -4   0    2.07    0.24
   7  -4   0    2.22    0.24
   7  -4   1    0.89    0.18
   7  -4   1    0.49    0.17
   7  -4   2    0.25    0.14
   7  -4   2   -0.04    0.10
   7  -4   3    0.62    0.19
   6  -4  -8    0.30    0.17
   6  -4  -8    0.17    0.13
   6  -4  -7    0.37    0.15
   6  -4  -7    0.52    0.15
   6  -4  -7    0.35    0.14
   6  -4  -6    0.13    0.11
   6  -4  -6    0.02    0.10
   6  -4  -6    0.24    0.13
   6  -4  -5    0.18    0.11
   6  -4  -5    0.42    0.13
   6  -4  -5    0.21    0.11
   6  -4  -4    1.65    0.21
   6  -4  -4    1.88    0.22
   6  -4  -4    1.79    0.22
   6  -4  -3    1.65    0.21
   6  -4  -3    1.44    0.19
   6  -4  -3    1.43    0.18
   6  -4  -2    5.00    0.24
   6  -4  -2    4.73    0.28
   6  -4  -2    4.99    0.30
   6  -4  -1   -0.04    0.07
   6  -4  -1    0.06    0.09
   6  -4  -1   -0.11    0.07
   6  -4  -1   -0.08    0.07
   6  -4  -1    0.02    0.08
   6  -4   0    1.48    0.17
   6  -4   0    1.23    0.17
   6  -4   0    1.49    0.19
   6  -4   0    1.44    0.17
   6  -4   0    1.05    0.15
   6  -4   1    2.15    0.22
   6  -4   1    2.02    0.23
   6  -4   1    2.10    0.24
   6  -4   2    0.74    0.17
   6  -4   2    0.48    0.16
   6  -4   3    0.92    0.21
   6  -4   3    0.43    0.16
   6  -4   4    0.14    0.15
   5  -4  -8   -0.02    0.12
   5  -4  -7    0.23    0.12
   5  -4  -7    0.28    0.14
   5  -4  -7    0.33    0.14
   5  -4  -6    0.09    0.10
   5  -4  -6   -0.07    0.08
   5  -4  -6   -0.11    0.08
   5  -4  -5    1.58    0.20
   5  -4  -5    1.88    0.22
   5  -4  -5    1.62    0.21
   5  -4  -4    0.37    0.11
   5  -4  -4    0.18    0.09
   5  -4  -4    0.17    0.11
   5  -4  -3    6.31    0.31
   5  -4  -3    6.52    0.30
   5  -4  -3    5.95    0.31
   5  -4  -2    0.60    0.09
   5  -4  -2    0.49    0.12
   5  -4  -2    0.44    0.11
   5  -4  -2    0.54    0.09
   5  -4  -1    6.44    0.30
   5  -4  -1    6.89    0.27
   5  -4  -1    6.13    0.28
   5  -4  -1    6.22    0.27
   5  -4  -1    5.89    0.29
   5  -4   0   -0.05    0.06
   5  -4   0   -0.06    0.06
   5  -4   0   -0.09    0.07
   5  -4   0   -0.01    0.06
   5  -4   0   -0.04    0.07
   5  -4   1    0.07    0.07
   5  -4   1    0.05    0.10
   5  -4   1    0.02    0.10
   5  -4   1    0.02    0.08
  -5   4  -2    0.88    0.14
   5  -4   2    0.68    0.15
   5  -4   2    0.87    0.17
   5  -4   3    0.14    0.11
   5  -4   3    0.14    0.11
   5  -4   4    0.20    0.14
   5  -4   4   -0.02    0.12
   5  -4   5    0.39    0.16
   4  -4  -8   -0.10    0.10
   4  -4  -7   -0.02    0.10
   4  -4  -6    0.07    0.10
   4  -4  -6    0.31    0.12
   4  -4  -6   -0.01    0.09
   4  -4  -5    0.53    0.14
   4  -4  -5    0.18    0.10
   4  -4  -5    0.29    0.11
   4  -4  -4    0.23    0.09
   4  -4  -4    0.08    0.07
   4  -4  -4    0.06    0.07
   4  -4  -3    4.35    0.24
   4  -4  -3    4.66    0.24
   4  -4  -3    4.09    0.24
   4  -4  -2    0.64    0.11
   4  -4  -2    0.47    0.07
   4  -4  -2    0.55    0.07
   4  -4  -2    0.48    0.10
   4  -4  -1    3.73    0.18
   4  -4  -1    3.65    0.20
   4  -4  -1    3.70    0.20
   4  -4  -1    3.82    0.17
   4  -4  -1    3.45    0.18
   4  -4   0    0.77    0.11
   4  -4   0    0.34    0.08
   4  -4   0    0.52    0.10
   4  -4   0    0.59    0.10
   4  -4   0    0.50    0.09
   4  -4   1   12.27    0.41
   4  -4   1   12.68    0.38
   4  -4   1   11.75    0.43
   4  -4   1   12.11    0.43
   4  -4   1   12.41    0.38
  -4   4  -2    0.06    0.06
   4  -4   2   -0.01    0.08
   4  -4   2   -0.08    0.07
  -4   4  -3    0.12    0.09
   4  -4   3    0.23    0.11
   4  -4   3    0.00    0.09
   4  -4   4    0.11    0.11
   4  -4   4   -0.06    0.10
   4  -4   5    0.19    0.13
   4  -4   5    0.00    0.10
   4  -4   6    0.17    0.16
   3  -4  -8    0.01    0.13
   3  -4  -7    2.18    0.28
   3  -4  -6    0.14    0.10
   3  -4  -6    0.45    0.14
   3  -4  -6    0.11    0.09
   3  -4  -5    0.11    0.10
   3  -4  -5   -0.02    0.08
   3  -4  -5   -0.19    0.06
   3  -4  -4    2.50    0.19
   3  -4  -4    2.94    0.20
   3  -4  -4    2.78    0.19
   3  -4  -3    2.98    0.18
   3  -4  -3    3.00    0.18
   3  -4  -3    3.22    0.18
   3  -4  -2    0.16    0.06
   3  -4  -2    0.15    0.06
   3  -4  -2    0.20    0.05
   3  -4  -1   14.98    0.43
   3  -4  -1   14.38    0.42
   3  -4  -1   15.02    0.37
   3  -4  -1   14.46    0.40
   3  -4  -1   14.71    0.38
   3  -4   0    1.43    0.11
   3  -4   0    1.01    0.10
   3  -4   0    1.02    0.11
   3  -4   0    1.41    0.11
   3  -4   0    1.36    0.10
   3  -4   1    2.24    0.14
   3  -4   1    1.88    0.13
   3  -4   1    1.90    0.13
   3  -4   1    1.92    0.15
   3  -4   1    2.08    0.16
  -3   4  -2   -0.02    0.05
   3  -4   2    0.11    0.08
   3  -4   2    0.17    0.05
   3  -4   2    0.10    0.08
   3  -4   2    0.07    0.05
  -3   4  -3    7.08    0.32
   3  -4   3    7.81    0.37
   3  -4   3    7.33    0.35
  -3   4  -4    2.13    0.22
   3  -4   4    1.85    0.22
   3  -4   4    1.64    0.21
  -3   4  -5   -0.07    0.09
   3  -4   5    0.03    0.11
   3  -4   5   -0.05    0.09
   3  -4   6    0.71    0.18
   3  -4   6    0.35    0.15
   2  -4  -8   -0.17    0.11
   2  -4  -7    0.19    0.13
   2  -4  -6   -0.03    0.09
   2  -4  -5    4.16    0.21
   2  -4  -5    4.25    0.22
   2  -4  -5    3.92    0.26
  -2   4   4   11.47    0.30
   2  -4  -4   11.35    0.42
   2  -4  -4   12.16    0.38
   2  -4  -4   11.43    0.37
  -2   4   3    0.24    0.03
   2  -4  -3    0.21    0.06
   2  -4  -3    0.29    0.07
   2  -4  -3    0.28    0.08
   2  -4  -2    0.37    0.07
   2  -4  -2    0.42    0.07
   2  -4  -2    0.26    0.06
   2  -4  -1  124.26    2.59
   2  -4  -1  124.41    2.62
   2  -4  -1  126.64    2.61
   2  -4   0    6.73    0.22
   2  -4   0    5.32    0.20
   2  -4   0    6.93    0.21
   2  -4   0    6.62    0.19
  -2   4  -1   79.11    1.69
   2  -4   1   79.56    1.65
   2  -4   1   79.02    1.64
   2  -4   1   75.53    1.69
   2  -4   1   79.05    1.66
  -2   4  -2   13.18    0.39
   2  -4   2   12.99    0.42
   2  -4   2   13.76    0.44
   2  -4   2   12.79    0.34
  -2   4  -3   -0.07    0.05
   2  -4   3    0.06    0.08
   2  -4   3    0.14    0.08
  -2   4  -4    0.27    0.10
   2  -4   4    0.03    0.09
   2  -4   4    0.11    0.11
  -2   4  -5    0.98    0.17
   2  -4   5    0.67    0.15
   2  -4   5    1.08    0.18
  -2   4  -6    1.09    0.20
   2  -4   6    0.87    0.19
   2  -4   6    0.80    0.18
   2  -4   7    0.11    0.14
   2  -4   7    0.05    0.13
   1  -4  -8    0.00    0.12
   1  -4  -7    0.86    0.20
   1  -4  -6    1.19    0.20
  -1   4   5    1.42    0.14
  -1   4   5    1.60    0.15
   1  -4  -5    1.37    0.19
  -1   4   4    3.38    0.16
  -1   4   4    2.51    0.14
   1  -4  -4    2.80    0.20
   1  -4  -4    2.83    0.15
   1  -4  -4    2.71    0.15
  -1   4   3    2.32    0.12
   1  -4  -3    2.15    0.15
   1  -4  -3    2.10    0.12
   1  -4  -3    1.88    0.11
  -1   4   2   18.48    0.41
   1  -4  -2   18.88    0.46
   1  -4  -2   18.60    0.45
   1  -4  -2   18.12    0.49
  -1   4   1   29.33    0.61
   1  -4  -1   28.84    0.65
   1  -4  -1   29.17    0.66
  -1   4   0   14.33    0.34
   1  -4   0   13.69    0.30
   1  -4   0   14.08    0.35
  -1   4  -1    1.23    0.08
   1  -4   1    1.14    0.10
   1  -4   1    1.13    0.08
   1  -4   1    1.19    0.10
  -1   4  -2    2.20    0.13
   1  -4   2    2.18    0.10
   1  -4   2    2.15    0.15
   1  -4   2    2.07    0.14
  -1   4  -3    9.08    0.32
   1  -4   3    9.21    0.33
   1  -4   3    8.70    0.25
   1  -4   3    8.62    0.33
  -1   4  -4   17.88    0.56
   1  -4   4   16.35    0.55
   1  -4   4   17.24    0.54
  -1   4  -5    2.49    0.22
   1  -4   5    2.55    0.22
   1  -4   5    1.91    0.21
  -1   4  -6    0.67    0.16
   1  -4   6    0.81    0.17
   1  -4   6    0.71    0.16
  -1   4  -7    0.17    0.13
  -1   4  -7    0.12    0.12
   1  -4   7    0.03    0.11
   0  -4  -7    0.58    0.17
   0   4   6    4.43    0.27
   0   4   6    3.74    0.24
   0  -4  -6    3.86    0.30
   0   4   5    4.09    0.24
   0   4   5    4.18    0.23
   0  -4  -5    4.10    0.28
   0   4   4    1.45    0.14
   0   4   4    1.39    0.14
   0  -4  -4    1.37    0.17
   0   4   3   18.83    0.50
   0   4   3   18.68    0.48
   0  -4  -3   18.68    0.43
   0  -4  -3   18.55    0.55
   0   4   2    0.21    0.05
   0   4   2    0.24    0.06
   0  -4  -2    0.25    0.07
   0  -4  -2    0.28    0.04
   0   4   1   14.72    0.36
   0  -4  -1   14.97    0.35
   0  -4  -1   15.35    0.38
   0   4   0   -0.05    0.02
   0   4   0   -0.02    0.03
   0  -4   0   -0.01    0.03
   0   4  -1   15.57    0.38
   0   4  -1   14.98    0.36
   0   4  -2    0.43    0.06
   0   4  -2    0.22    0.06
   0  -4   2    0.25    0.06
   0  -4   2    0.38    0.06
   0   4  -3   19.64    0.54
   0  -4   3   18.94    0.51
   0  -4   3   19.16    0.48
   0  -4   3   18.90    0.47
   0  -4   3   19.09    0.52
   0   4  -4    1.31    0.16
   0  -4   4    1.30    0.11
   0  -4   4    1.42    0.12
   0  -4   4    1.32    0.15
   0  -4   4    1.24    0.15
   0   4  -5    3.67    0.26
   0  -4   5    3.70    0.23
   0   4  -6    4.63    0.31
   0  -4   6    3.81    0.26
   0   4  -7    0.38    0.15
   0   4  -8    0.25    0.15
  -1  -4  -7    0.09    0.12
   1   4   6    1.14    0.18
   1   4   6    0.56    0.14
  -1  -4  -6    0.64    0.17
   1   4   5    2.21    0.21
   1   4   5    2.64    0.21
  -1  -4  -5    2.40    0.25
   1   4   4   16.85    0.51
   1   4   4   15.69    0.51
  -1  -4  -4   15.32    0.55
   1   4   3    8.94    0.32
   1   4   3    8.42    0.32
  -1  -4  -3    8.74    0.35
   1   4   2    2.14    0.13
   1   4   2    2.14    0.13
  -1  -4  -2    2.21    0.15
  -1  -4  -2    2.08    0.07
   1   4   1    1.29    0.10
   1   4   1    1.22    0.09
  -1  -4  -1    1.30    0.07
  -1  -4  -1    1.29    0.10
   1   4   0   13.59    0.34
  -1  -4   0   13.95    0.34
   1   4  -1   24.53    0.60
   1   4  -1   28.13    0.63
  -1  -4   1   29.28    0.63
   1   4  -2   19.53    0.49
   1   4  -2   18.59    0.46
   1   4  -2   18.61    0.44
  -1  -4   2   18.42    0.47
  -1  -4   2   18.68    0.47
   1   4  -3    2.36    0.13
   1   4  -3    1.90    0.14
   1   4  -3    2.20    0.13
  -1  -4   3    2.19    0.13
  -1  -4   3    1.99    0.12
   1   4  -4    3.00    0.17
   1   4  -4    3.08    0.19
  -1  -4   4    3.03    0.17
  -1  -4   4    3.00    0.17
  -1  -4   4    2.82    0.16
   1   4  -5    1.69    0.17
   1   4  -5    1.27    0.18
  -1  -4   5    1.48    0.14
  -1  -4   5    1.29    0.15
   1   4  -6    0.67    0.15
   1   4  -6    0.71    0.13
  -1  -4   6    0.67    0.13
   1   4  -7    0.48    0.15
   1   4  -8    0.01    0.13
   2   4   7    0.27    0.15
  -2  -4  -7    0.09    0.15
   2   4   6    0.60    0.16
   2   4   6    0.66    0.16
  -2  -4  -6    0.47    0.16
   2   4   5    0.98    0.17
   2   4   5    0.70    0.15
  -2  -4  -5    0.77    0.16
   2   4   4    0.26    0.11
   2   4   4    0.36    0.11
  -2  -4  -4    0.15    0.10
   2   4   3   -0.06    0.07
   2   4   3   -0.06    0.07
  -2  -4  -3    0.10    0.07
   2   4   2   12.30    0.41
   2   4   2   12.28    0.40
  -2  -4  -2   12.65    0.28
  -2  -4  -2   12.99    0.43
   2   4   1   78.75    1.61
   2   4   1   77.91    1.67
   2   4   1   73.51    1.71
  -2  -4  -1   77.20    1.58
   2   4   0    6.16    0.23
   2   4   0    6.49    0.23
   2   4   0    6.61    0.22
  -2  -4   0    6.57    0.21
   2   4  -2    0.33    0.07
   2   4  -2    0.42    0.07
   2   4  -2    0.40    0.06
  -2  -4   2    0.30    0.06
   2   4  -3    0.35    0.07
   2   4  -3    0.36    0.08
   2   4  -3    0.24    0.06
   2   4  -3    0.29    0.08
  -2  -4   3    0.27    0.07
   2   4  -4   11.68    0.34
   2   4  -4   11.99    0.36
   2   4  -4   11.78    0.38
   2   4  -4   11.79    0.42
  -2  -4   4   11.49    0.38
   2   4  -5    3.91    0.21
   2   4  -5    3.76    0.25
   2   4  -5    4.25    0.21
  -2  -4   5    4.29    0.22
   2   4  -6   -0.01    0.09
   2   4  -7    0.16    0.12
   2   4  -8    0.01    0.12
   3   4   6    0.62    0.16
   3   4   6    0.39    0.15
  -3  -4  -6    0.47    0.16
   3   4   5    0.06    0.10
   3   4   5   -0.03    0.09
  -3  -4  -5    0.04    0.10
   3   4   4    1.74    0.21
   3   4   4    1.56    0.20
  -3  -4  -4    1.89    0.22
   3   4   3    7.18    0.35
   3   4   3    7.02    0.34
  -3  -4  -3    7.57    0.36
   3   4   2    0.17    0.08
   3   4   2    0.16    0.08
  -3  -4  -2    0.10    0.07
   3   4   1    2.05    0.15
   3   4   1    2.08    0.16
   3   4   1    1.98    0.16
   3   4   1    2.06    0.11
  -3  -4  -1    2.20    0.11
   3   4   0    1.39    0.12
   3   4   0    1.44    0.14
   3   4   0    1.48    0.12
   3   4   0    1.28    0.10
   3   4  -2    0.14    0.05
   3   4  -2    0.18    0.05
   3   4  -2    0.30    0.07
   3   4  -2    0.31    0.07
   3   4  -2    0.29    0.07
   3   4  -3    3.48    0.20
   3   4  -3    3.06    0.18
   3   4  -3    3.30    0.15
   3   4  -3    3.31    0.14
   3   4  -3    3.46    0.19
   3   4  -4    3.08    0.16
   3   4  -4    3.06    0.15
   3   4  -4    2.67    0.20
   3   4  -4    3.05    0.20
   3   4  -5    0.03    0.08
   3   4  -5    0.14    0.09
  -3  -4   5    0.16    0.09
   3   4  -6    0.37    0.13
   3   4  -6   -0.01    0.09
  -3  -4   6    0.49    0.12
   3   4  -7    1.67    0.23
   3   4  -8   -0.10    0.10
   4   4   6    0.14    0.14
   4   4   5    0.20    0.13
   4   4   5    0.11    0.12
  -4  -4  -5    0.26    0.13
   4   4   4    0.05    0.09
   4   4   4    0.18    0.11
  -4  -4  -4    0.04    0.09
   4   4   3    0.22    0.11
   4   4   3    0.27    0.11
  -4  -4  -3    0.11    0.09
   4   4   2    0.03    0.08
   4   4   2   -0.14    0.07
  -4  -4  -2    0.11    0.08
   4   4   1   11.83    0.35
   4   4   1   11.96    0.45
   4   4   1   11.63    0.42
   4   4   1   12.20    0.44
  -4  -4  -1   12.29    0.35
   4   4   0    0.49    0.10
   4   4   0    0.61    0.09
   4   4   0    0.66    0.11
   4   4   0    0.47    0.10
   4   4   0    0.63    0.09
   4   4  -1    3.33    0.20
   4   4  -1    3.58    0.19
   4   4  -1    3.14    0.18
   4   4  -2    0.63    0.09
   4   4  -2    0.48    0.10
   4   4  -2    0.44    0.10
   4   4  -2    0.63    0.09
   4   4  -2    0.52    0.10
   4   4  -3    4.48    0.25
   4   4  -3    4.62    0.18
   4   4  -3    4.64    0.25
   4   4  -3    4.29    0.24
   4   4  -3    4.68    0.19
   4   4  -4    0.09    0.08
   4   4  -4   -0.02    0.05
   4   4  -4   -0.06    0.07
   4   4  -4    0.12    0.08
   4   4  -5    0.43    0.13
   4   4  -5    0.39    0.12
   4   4  -6    0.08    0.10
   4   4  -6    0.21    0.11
  -4  -4   6    0.20    0.10
   4   4  -7   -0.22    0.07
   4   4  -7    0.01    0.09
  -4  -4   7    0.12    0.10
   4   4  -8   -0.13    0.10
   5   4   5    0.47    0.17
  -5  -4  -5    0.28    0.15
   5   4   4    0.01    0.11
   5   4   4    0.14    0.14
  -5  -4  -4    0.09    0.11
   5   4   3    0.36    0.14
   5   4   3    0.21    0.12
  -5  -4  -3    0.16    0.10
   5   4   2    0.92    0.17
   5   4   2    0.76    0.16
  -5  -4  -2    0.93    0.16
   5   4   1    0.04    0.10
   5   4   1    0.14    0.10
   5   4   1    0.02    0.08
   5   4   0   -0.01    0.06
   5   4   0    0.06    0.07
   5   4   0    0.09    0.08
   5   4   0   -0.02    0.07
   5   4   0    0.04    0.07
   5   4  -1    6.21    0.28
   5   4  -1    5.78    0.30
   5   4  -1    6.43    0.29
   5   4  -1    6.30    0.28
   5   4  -1    6.15    0.28
   5   4  -2    0.44    0.11
   5   4  -2    0.58    0.10
   5   4  -2    0.46    0.10
   5   4  -2    0.48    0.12
   5   4  -2    0.55    0.12
   5   4  -3    5.57    0.30
   5   4  -3    6.27    0.24
   5   4  -3    6.41    0.24
   5   4  -3    6.54    0.32
   5   4  -3    6.48    0.32
   5   4  -4    0.48    0.13
   5   4  -4    0.41    0.11
   5   4  -4    0.38    0.12
   5   4  -5    1.10    0.18
   5   4  -5    1.50    0.19
   5   4  -5    1.61    0.20
   5   4  -6    0.10    0.10
   5   4  -6    0.09    0.10
   5   4  -7    0.30    0.13
   5   4  -7    0.37    0.14
  -5  -4   7    0.25    0.12
   5   4  -8    0.00    0.11
   6   4   4    0.16    0.15
  -6  -4  -4    0.04    0.12
   6   4   3    0.52    0.17
   6   4   3    0.29    0.14
  -6  -4  -3    0.71    0.17
   6   4   2    1.06    0.20
   6   4   2    0.66    0.16
  -6  -4  -2    0.97    0.18
   6   4   1    1.93    0.23
   6   4   1    2.16    0.25
   6   4   1    1.89    0.23
   6   4   0    1.27    0.18
   6   4   0    1.17    0.18
   6   4   0    1.52    0.19
   6   4  -1    0.00    0.08
   6   4  -1    0.07    0.09
   6   4  -1    0.00    0.04
   6   4  -1   -0.03    0.04
   6   4  -1    0.03    0.08
   6   4  -2    5.24    0.30
   6   4  -2    4.82    0.29
   6   4  -2    4.99    0.26
   6   4  -2    5.26    0.26
   6   4  -2    4.64    0.28
   6   4  -3    1.45    0.19
   6   4  -3    1.49    0.19
   6   4  -3    1.29    0.19
   6   4  -4    1.68    0.21
   6   4  -4    1.56    0.20
   6   4  -4    2.11    0.24
   6   4  -5    0.55    0.14
   6   4  -5    0.31    0.13
   6   4  -5    0.48    0.14
   6   4  -6    0.05    0.11
   6   4  -6    0.06    0.11
   6   4  -6    0.15    0.11
   6   4  -7    0.39    0.15
   6   4  -7    0.23    0.14
  -6  -4   7    0.38    0.14
   6   4  -8    0.03    0.13
   6   4  -8    0.16    0.14
  -6  -4   8    0.44    0.16
   7   4   3    0.26    0.16
  -7  -4  -3    0.58    0.18
   7   4   2   -0.04    0.11
   7   4   2   -0.02    0.11
  -7  -4  -2   -0.02    0.09
   7   4   1    0.99    0.20
   7   4   1    0.67    0.17
   7   4   1    0.38    0.14
   7   4   0    2.13    0.26
   7   4   0    2.19    0.24
   7   4   0    2.07    0.25
   7   4  -1    2.02    0.21
   7   4  -1    2.27    0.23
   7   4  -1    1.94    0.22
   7   4  -1    2.60    0.22
   7   4  -1    1.91    0.24
   7   4  -2    1.14    0.16
   7   4  -2    0.95    0.18
   7   4  -2    0.84    0.16
   7   4  -2    0.74    0.14
   7   4  -2    0.72    0.15
   7   4  -3    0.10    0.10
   7   4  -3    0.10    0.11
   7   4  -3    0.14    0.11
   7   4  -4    1.21    0.19
   7   4  -4    1.27    0.20
   7   4  -4    1.28    0.20
   7   4  -5    0.17    0.12
   7   4  -5    0.32    0.12
   7   4  -5    0.17    0.11
   7   4  -6    0.83    0.19
   7   4  -6    0.62    0.17
   7   4  -6    1.00    0.20
   7   4  -7    0.00    0.11
   7   4  -7    0.14    0.14
  -7  -4   7   -0.06    0.10
   7   4  -8    0.10    0.14
  -7  -4   8    0.06    0.13
   8   4   2    0.20    0.16
   8   4   1   -0.08    0.12
   8   4   1   -0.16    0.11
   8   4   0    0.10    0.12
   8   4   0    0.01    0.11
   8   4   0    0.11    0.11
   8   4  -1    0.51    0.15
   8   4  -1    0.39    0.14
   8   4  -1    0.70    0.17
   8   4  -2    0.48    0.15
   8   4  -2    0.30    0.13
   8   4  -2    0.22    0.12
   8   4  -3    0.59    0.15
   8   4  -3    0.79    0.17
   8   4  -3    0.58    0.16
   8   4  -4    0.61    0.17
   8   4  -4    0.59    0.16
   8   4  -4    0.78    0.19
   8   4  -5   -0.07    0.10
   8   4  -5    0.16    0.13
   8   4  -5   -0.01    0.11
   8   4  -6    0.02    0.10
   8   4  -6   -0.11    0.10
   8   4  -6   -0.10    0.13
   8   4  -7   -0.03    0.12
   8   4  -8    0.04    0.15
   9   4   0    0.30    0.15
   9   4  -1    0.21    0.14
   9   4  -2    0.18    0.14
   9   4  -3    0.17    0.14
   9   4  -3    0.04    0.11
   9   4  -3    0.09    0.12
   9   4  -4    0.10    0.12
   9   4  -4    0.02    0.13
   9   4  -4    0.10    0.14
   9   4  -5    0.15    0.12
   9   4  -5   -0.15    0.12
   9   4  -5    0.19    0.16
   9   4  -6   -0.08    0.11
   9   4  -7    0.21    0.16
  10   4  -3    0.16    0.15
  10   4  -4    0.13    0.14
  10  -5  -4    0.01    0.13
  10  -5  -3    0.32    0.16
   9  -5  -7    0.07    0.16
   9  -5  -6   -0.03    0.12
   9  -5  -6    0.11    0.13
   9  -5  -5   -0.08    0.11
   9  -5  -5    0.20    0.13
   9  -5  -4   -0.06    0.11
   9  -5  -4   -0.12    0.11
   9  -5  -3    0.09    0.13
   9  -5  -3    0.23    0.13
   9  -5  -2   -0.05    0.10
   9  -5  -2   -0.12    0.10
   8  -5  -8    0.15    0.15
   8  -5  -7    0.09    0.14
   8  -5  -7   -0.04    0.12
   8  -5  -6    0.18    0.13
   8  -5  -6    0.07    0.13
   8  -5  -6    0.15    0.13
   8  -5  -5    0.05    0.11
   8  -5  -5    0.15    0.12
   8  -5  -5    0.13    0.11
   8  -5  -4    0.03    0.10
   8  -5  -4   -0.03    0.10
   8  -5  -4   -0.05    0.10
   8  -5  -3    0.32    0.13
   8  -5  -3    0.39    0.15
   8  -5  -2    0.18    0.12
   8  -5  -2    0.25    0.12
   8  -5   0    0.16    0.12
   8  -5   0    0.04    0.12
   8  -5   1    0.37    0.17
   8  -5   1    0.23    0.14
   8  -5   2    1.07    0.23
   7  -5  -8    0.48    0.18
   7  -5  -8    0.79    0.20
   7  -5  -7    0.00    0.12
   7  -5  -7   -0.09    0.09
   7  -5  -7    0.00    0.11
   7  -5  -6   -0.05    0.11
   7  -5  -6   -0.14    0.09
   7  -5  -6    0.17    0.12
   7  -5  -5    0.13    0.11
   7  -5  -5    0.10    0.11
   7  -5  -5    0.42    0.14
   7  -5  -4    0.52    0.13
   7  -5  -4    1.03    0.18
   7  -5  -4    0.80    0.17
   7  -5  -3    0.26    0.13
   7  -5  -3    0.38    0.13
   7  -5  -3    0.15    0.08
   7  -5  -2    2.50    0.25
   7  -5  -2    1.94    0.23
   7  -5  -2    2.50    0.22
   7  -5  -1    1.08    0.17
   7  -5  -1    1.03    0.17
   7  -5  -1    1.32    0.18
   7  -5  -1    1.03    0.17
   7  -5  -1    1.00    0.16
   7  -5   0    0.12    0.11
   7  -5   0    0.15    0.11
   7  -5   1    0.22    0.13
   7  -5   1    0.13    0.12
   7  -5   2    0.84    0.18
   7  -5   2    0.25    0.14
   7  -5   3    0.13    0.14
   6  -5  -8    0.00    0.11
   6  -5  -8    0.22    0.15
   6  -5  -7    0.06    0.12
   6  -5  -7    0.25    0.13
   6  -5  -7    0.26    0.13
   6  -5  -6    0.50    0.14
   6  -5  -6    0.51    0.15
   6  -5  -6    0.61    0.16
   6  -5  -5    0.03    0.08
   6  -5  -5    0.12    0.11
   6  -5  -5    0.00    0.10
   6  -5  -4    0.08    0.09
   6  -5  -4    0.07    0.10
   6  -5  -4   -0.04    0.09
   6  -5  -3    0.95    0.15
   6  -5  -3    0.71    0.14
   6  -5  -3    0.57    0.14
   6  -5  -2    0.10    0.10
   6  -5  -2    0.05    0.09
   6  -5  -2   -0.04    0.07
   6  -5  -1    0.04    0.08
   6  -5  -1   -0.04    0.08
   6  -5  -1   -0.08    0.07
   6  -5  -1   -0.09    0.07
   6  -5  -1    0.00    0.08
   6  -5   0    4.56    0.26
   6  -5   0    4.57    0.27
   6  -5   0    4.56    0.27
   6  -5   0    4.72    0.29
   6  -5   0    4.58    0.26
   6  -5   1    0.47    0.13
   6  -5   1    0.50    0.14
   6  -5   2    1.15    0.21
   6  -5   2    1.69    0.24
   6  -5   3    0.14    0.13
   6  -5   3    0.09    0.13
   6  -5   4    0.51    0.17
   5  -5  -8   -0.05    0.13
   5  -5  -7    0.00    0.11
   5  -5  -7    0.01    0.10
   5  -5  -7    0.16    0.11
   5  -5  -6    1.03    0.18
   5  -5  -6    1.31    0.19
   5  -5  -6    0.81    0.17
   5  -5  -5    0.14    0.11
   5  -5  -5    0.16    0.11
   5  -5  -5    0.16    0.11
   5  -5  -4    0.67    0.14
   5  -5  -4    0.63    0.13
   5  -5  -4    0.68    0.14
   5  -5  -3    1.56    0.17
   5  -5  -3    1.68    0.19
   5  -5  -3    1.64    0.19
   5  -5  -2    6.81    0.32
   5  -5  -2    6.50    0.24
   5  -5  -2    6.84    0.32
   5  -5  -2    6.70    0.25
   5  -5  -2    6.65    0.29
   5  -5  -1    0.81    0.14
   5  -5  -1    0.80    0.12
   5  -5  -1    0.75    0.11
   5  -5  -1    0.74    0.12
   5  -5  -1    0.90    0.13
   5  -5   0    0.53    0.11
   5  -5   0    0.57    0.12
   5  -5   0    0.39    0.10
   5  -5   0    0.58    0.12
   5  -5   0    0.57    0.11
   5  -5   1    0.31    0.10
   5  -5   1    0.42    0.13
   5  -5   1    0.26    0.12
   5  -5   1    0.27    0.09
   5  -5   2    1.22    0.19
   5  -5   2    0.71    0.15
   5  -5   3    0.08    0.11
   5  -5   3   -0.12    0.10
   5  -5   4    1.60    0.25
   5  -5   4    1.75    0.26
   5  -5   5    0.07    0.14
   4  -5  -8    1.17    0.23
   4  -5  -7    0.26    0.13
   4  -5  -6    0.19    0.10
   4  -5  -6    0.05    0.09
   4  -5  -6    0.18    0.11
   4  -5  -5    0.20    0.12
   4  -5  -5    0.39    0.11
   4  -5  -5    0.12    0.09
   4  -5  -4    5.98    0.30
   4  -5  -4    5.38    0.28
   4  -5  -4    5.69    0.29
   4  -5  -3    7.71    0.32
   4  -5  -3    7.96    0.33
   4  -5  -3    7.94    0.32
   4  -5  -2    6.42    0.29
   4  -5  -2    6.71    0.27
   4  -5  -2    6.84    0.29
   4  -5  -2    6.75    0.21
   4  -5  -2    6.90    0.22
   4  -5  -1    2.08    0.16
   4  -5  -1    2.36    0.16
   4  -5  -1    2.02    0.15
   4  -5  -1    2.07    0.14
   4  -5  -1    2.06    0.14
   4  -5   0    2.27    0.15
   4  -5   0    2.46    0.16
   4  -5   0    2.27    0.18
   4  -5   0    2.34    0.17
   4  -5   0    2.58    0.17
   4  -5   1    0.01    0.06
   4  -5   1    0.04    0.08
   4  -5   1   -0.03    0.07
   4  -5   1    0.04    0.06
   4  -5   1    0.01    0.05
  -4   5  -2    1.27    0.15
   4  -5   2    1.25    0.18
   4  -5   2    1.34    0.18
  -4   5  -3    0.29    0.10
   4  -5   3    0.21    0.11
   4  -5   3    0.08    0.10
   4  -5   4    0.10    0.12
   4  -5   4    0.10    0.11
   4  -5   5    0.00    0.11
   4  -5   5   -0.21    0.09
   4  -5   6    0.15    0.15
   3  -5  -8    0.10    0.14
   3  -5  -7    0.09    0.12
   3  -5  -6    6.31    0.31
   3  -5  -6    6.27    0.37
   3  -5  -6    6.06    0.30
   3  -5  -5    0.04    0.08
   3  -5  -5   -0.09    0.08
   3  -5  -5    0.00    0.09
   3  -5  -4   14.63    0.50
   3  -5  -4   14.97    0.47
   3  -5  -4   14.27    0.47
   3  -5  -3   -0.16    0.04
   3  -5  -3    0.02    0.06
   3  -5  -3    0.05    0.05
  -3   5   2    8.67    0.22
   3  -5  -2    8.38    0.30
   3  -5  -2    8.06    0.30
   3  -5  -1   19.94    0.51
   3  -5  -1   20.11    0.49
   3  -5  -1   20.10    0.48
   3  -5  -1   20.47    0.55
   3  -5  -1   19.85    0.54
   3  -5   0   -0.01    0.05
   3  -5   0    0.01    0.02
   3  -5   0    0.01    0.04
   3  -5   0    0.01    0.02
   3  -5   0    0.06    0.05
   3  -5   1    1.33    0.15
   3  -5   1    1.58    0.12
   3  -5   1    1.52    0.15
   3  -5   1    1.57    0.12
  -3   5  -2    2.40    0.16
   3  -5   2    2.71    0.19
   3  -5   2    2.46    0.20
   3  -5   2    2.36    0.14
   3  -5   2    2.45    0.14
  -3   5  -3    0.60    0.11
   3  -5   3    0.27    0.11
   3  -5   3    0.38    0.12
  -3   5  -4    3.63    0.24
   3  -5   4    3.77    0.28
   3  -5   4    3.38    0.26
   3  -5   5    0.31    0.13
   3  -5   5    0.23    0.12
   3  -5   6    0.14    0.14
   3  -5   6    0.08    0.14
   2  -5  -8    0.50    0.17
   2  -5  -7    0.29    0.15
   2  -5  -6    0.22    0.12
   2  -5  -5    1.06    0.13
   2  -5  -5    1.36    0.18
   2  -5  -5    0.96    0.13
  -2   5   4    6.11    0.19
   2  -5  -4    5.72    0.28
   2  -5  -4    5.91    0.25
   2  -5  -4    5.98    0.25
  -2   5   3    4.22    0.12
   2  -5  -3    4.14    0.19
   2  -5  -3    4.41    0.20
   2  -5  -3    3.65    0.20
  -2   5   2   40.14    0.81
   2  -5  -2   38.87    0.92
   2  -5  -2   38.78    0.92
   2  -5  -2   39.58    0.91
  -2   5   1    3.06    0.12
   2  -5  -1    3.19    0.13
   2  -5  -1    3.05    0.15
   2  -5  -1    3.19    0.16
   2  -5   0  125.51    2.64
   2  -5   0  126.65    2.52
   2  -5   0  126.21    2.63
   2  -5   0  128.51    2.60
   2  -5   0  127.39    2.62
  -2   5  -1    5.20    0.18
   2  -5   1    4.83    0.22
   2  -5   1    5.08    0.21
   2  -5   1    5.05    0.19
   2  -5   1    4.96    0.18
  -2   5  -2    5.41    0.22
   2  -5   2    5.36    0.19
   2  -5   2    5.16    0.26
   2  -5   2    5.31    0.24
   2  -5   2    5.22    0.19
  -2   5  -3    0.52    0.10
   2  -5   3    0.47    0.12
   2  -5   3    0.51    0.12
  -2   5  -4    4.98    0.28
   2  -5   4    4.56    0.29
   2  -5   4    5.19    0.31
  -2   5  -5    0.05    0.09
   2  -5   5    0.02    0.09
   2  -5   5    0.00    0.09
   2  -5   6    4.40    0.33
   2  -5   6    4.57    0.34
   2  -5   7    0.23    0.15
   1  -5  -8    0.18    0.15
   1  -5  -7    0.02    0.11
   1  -5  -6    9.22    0.46
  -1   5   5    3.58    0.20
  -1   5   5    2.81    0.18
   1  -5  -5    3.76    0.26
  -1   5   4    9.73    0.30
  -1   5   4   10.57    0.32
   1  -5  -4   10.03    0.31
   1  -5  -4   10.26    0.31
   1  -5  -4   10.10    0.40
  -1   5   3   14.81    0.36
  -1   5   3   14.84    0.38
   1  -5  -3   14.51    0.39
   1  -5  -3   14.50    0.45
   1  -5  -3   14.44    0.39
  -1   5   2    3.48    0.13
   1  -5  -2    3.55    0.15
   1  -5  -2    3.53    0.17
   1  -5  -2    3.90    0.16
  -1   5   1    0.29    0.05
   1  -5  -1    0.33    0.05
   1  -5  -1    0.34    0.06
  -1   5   0    9.13    0.25
   1  -5   0    9.33    0.26
   1  -5   0    9.07    0.20
  -1   5  -1    2.21    0.09
   1  -5   1    2.36    0.13
   1  -5   1    2.26    0.11
  -1   5  -2   64.91    1.42
   1  -5   2   63.76    1.36
   1  -5   2   65.97    1.39
   1  -5   2   63.74    1.43
  -1   5  -3    2.25    0.16
   1  -5   3    2.36    0.12
   1  -5   3    2.07    0.16
   1  -5   3    2.17    0.12
   1  -5   3    1.72    0.17
  -1   5  -4    0.01    0.07
   1  -5   4    0.10    0.09
   1  -5   4    0.06    0.09
  -1   5  -5    0.29    0.11
   1  -5   5    0.32    0.12
   1  -5   5    0.33    0.12
  -1   5  -6    3.19    0.27
   1  -5   6    2.94    0.28
  -1   5  -7    0.19    0.13
   1  -5   7    0.17    0.13
   0  -5  -7    0.14    0.14
   0  -5  -6    0.21    0.12
   0   5   5    0.57    0.12
   0   5   5    0.46    0.11
   0  -5  -5    0.69    0.15
   0   5   4   21.40    0.60
   0   5   4   21.98    0.58
   0  -5  -4   21.96    0.68
   0   5   3    8.75    0.28
   0   5   3    8.98    0.30
   0  -5  -3    8.63    0.33
   0  -5  -3    8.86    0.24
   0   5   2   15.23    0.38
   0   5   2   14.78    0.39
   0  -5  -2   14.98    0.43
   0  -5  -2   14.87    0.36
   0   5   1    1.02    0.09
   0  -5  -1    0.88    0.08
   0  -5  -1    1.01    0.09
   0   5   0   -0.23    0.02
   0   5   0   -0.18    0.03
   0  -5   0   -0.20    0.03
   0   5  -1    1.06    0.07
   0   5  -1    1.10    0.10
   0  -5   1    1.19    0.10
   0   5  -2   14.51    0.41
   0   5  -2   15.33    0.40
   0  -5   2   15.20    0.40
   0  -5   2   15.50    0.39
   0  -5   2   15.00    0.39
   0   5  -3    8.87    0.32
   0   5  -3    9.10    0.31
   0  -5   3    8.99    0.28
   0  -5   3    9.07    0.31
   0  -5   3    9.04    0.28
   0   5  -4   22.44    0.64
   0   5  -4   22.13    0.64
   0  -5   4   22.59    0.56
   0  -5   4   21.35    0.56
   0  -5   4   22.24    0.61
   0   5  -5    0.60    0.14
   0   5  -5    0.92    0.16
   0  -5   5    0.92    0.15
   0   5  -6    0.32    0.10
   0   5  -6    0.41    0.12
   0  -5   6    0.32    0.12
   0   5  -7    0.02    0.12
   0  -5   7   -0.11    0.09
  -1  -5  -7   -0.13    0.10
   1   5   6    2.84    0.27
   1   5   6    2.73    0.26
  -1  -5  -6    2.52    0.29
   1   5   5    0.46    0.12
   1   5   5    0.32    0.10
  -1  -5  -5    0.49    0.14
   1   5   4   -0.02    0.07
   1   5   4   -0.04    0.07
  -1  -5  -4    0.01    0.08
   1   5   3    2.10    0.16
   1   5   3    2.03    0.15
  -1  -5  -3    2.30    0.17
   1   5   2   65.57    1.37
   1   5   2   62.88    1.41
  -1  -5  -2   64.14    1.32
   1   5   1    2.19    0.12
   1   5   1    2.15    0.13
  -1  -5  -1    2.28    0.10
   1   5   0    8.83    0.26
   1   5   0    9.07    0.26
  -1  -5   0    9.01    0.25
   1   5  -1    0.36    0.07
   1   5  -1    0.30    0.05
  -1  -5   1    0.31    0.06
  -1  -5   1    0.34    0.07
   1   5  -3   14.77    0.40
   1   5  -3   14.87    0.44
   1   5  -3   14.78    0.41
  -1  -5   3   14.27    0.41
  -1  -5   3   14.73    0.41
   1   5  -4   11.00    0.35
   1   5  -4   10.18    0.35
   1   5  -4   10.66    0.39
  -1  -5   4   10.02    0.34
  -1  -5   4   10.92    0.35
   1   5  -5    3.53    0.22
   1   5  -5    3.58    0.25
  -1  -5   5    3.37    0.19
   1   5  -6    9.04    0.38
   1   5  -6    8.85    0.43
   1   5  -7   -0.04    0.10
   1   5  -8    0.19    0.15
   2   5   7    0.11    0.13
   2   5   6    4.64    0.31
   2   5   6    4.65    0.31
  -2  -5  -6    3.99    0.32
   2   5   5    0.20    0.10
   2   5   5    0.12    0.10
  -2  -5  -5    0.25    0.12
   2   5   4    4.50    0.28
   2   5   4    5.00    0.28
  -2  -5  -4    4.50    0.29
   2   5   3    0.44    0.11
   2   5   3    0.35    0.11
  -2  -5  -3    0.49    0.11
   2   5   2    4.58    0.24
   2   5   2    5.65    0.25
  -2  -5  -2    5.18    0.15
  -2  -5  -2    5.21    0.25
   2   5   1    4.76    0.22
   2   5   1    5.20    0.21
   2   5   1    4.65    0.21
  -2  -5  -1    4.93    0.16
   2   5   0  122.41    2.62
   2   5   0  121.16    2.52
   2   5   0  121.51    2.44
  -2  -5   0  124.77    2.51
  -2  -5   0  120.86    2.53
   2   5  -1    2.90    0.15
   2   5  -1    2.97    0.14
   2   5  -1    3.31    0.14
   2   5  -1    3.04    0.15
  -2  -5   1    3.12    0.15
   2   5  -2   38.90    0.86
   2   5  -2   38.40    0.83
   2   5  -2   39.30    0.92
   2   5  -2   37.76    0.90
  -2  -5   2   38.30    0.89
   2   5  -3    4.42    0.21
   2   5  -3    4.51    0.19
   2   5  -3    3.91    0.20
   2   5  -3    4.15    0.17
  -2  -5   3    3.94    0.20
   2   5  -4    6.27    0.23
   2   5  -4    6.55    0.25
   2   5  -4    5.78    0.28
   2   5  -5    0.99    0.13
   2   5  -5    1.67    0.16
   2   5  -5    1.04    0.16
  -2  -5   5    1.15    0.14
  -2  -5   5    1.05    0.14
   2   5  -6    0.00    0.08
   2   5  -7    0.22    0.13
   2   5  -8    0.46    0.16
   3   5   6    0.04    0.10
   3   5   6    0.09    0.12
  -3  -5  -6    0.19    0.14
   3   5   5    0.17    0.11
   3   5   5    0.15    0.12
  -3  -5  -5    0.23    0.12
   3   5   4    3.51    0.25
   3   5   4    3.11    0.25
  -3  -5  -4    3.63    0.27
   3   5   3    0.46    0.12
   3   5   3    0.50    0.13
  -3  -5  -3    0.26    0.11
   3   5   2    2.35    0.19
   3   5   2    2.34    0.18
  -3  -5  -2    2.78    0.20
   3   5   1    1.27    0.14
   3   5   1    1.41    0.15
   3   5   1    1.17    0.13
  -3  -5  -1    1.36    0.09
  -3  -5  -1    1.54    0.10
   3   5   0    0.08    0.06
   3   5   0   -0.05    0.04
   3   5   0    0.04    0.05
   3   5   0   -0.01    0.05
  -3  -5   0   -0.04    0.04
   3   5  -1   19.42    0.55
   3   5  -1   19.41    0.51
   3   5  -1   19.78    0.50
   3   5  -1   19.52    0.52
  -3  -5   1   19.78    0.52
   3   5  -2    7.97    0.30
   3   5  -2    8.48    0.26
   3   5  -2    8.22    0.27
   3   5  -2    8.16    0.31
   3   5  -3    0.07    0.05
   3   5  -3    0.04    0.06
   3   5  -3    0.03    0.05
   3   5  -3   -0.07    0.05
  -3  -5   3    0.00    0.06
   3   5  -4   15.99    0.50
   3   5  -4   15.08    0.41
   3   5  -4   15.12    0.42
   3   5  -4   15.25    0.51
  -3  -5   4   14.62    0.48
   3   5  -5    0.05    0.09
   3   5  -5   -0.02    0.08
  -3  -5   5   -0.08    0.07
   3   5  -6    6.66    0.37
  -3  -5   6    6.14    0.32
  -3  -5   6    6.54    0.31
   3   5  -7   -0.04    0.09
   3   5  -8    0.15    0.13
   4   5   6    0.10    0.15
   4   5   5   -0.09    0.11
   4   5   5    0.30    0.14
  -4  -5  -5   -0.17    0.08
   4   5   4   -0.02    0.09
   4   5   4    0.25    0.12
  -4  -5  -4    0.03    0.10
   4   5   3    0.24    0.12
   4   5   3    0.10    0.09
  -4  -5  -3    0.18    0.10
   4   5   2    0.90    0.15
   4   5   2    0.86    0.15
  -4  -5  -2    0.96    0.16
   4   5   1    0.00    0.08
   4   5   1   -0.01    0.07
   4   5   1    0.02    0.07
  -4  -5  -1   -0.03    0.04
   4   5   0    2.48    0.17
   4   5   0    2.50    0.15
   4   5   0    2.52    0.19
   4   5   0    2.45    0.18
  -4  -5   0    2.66    0.16
   4   5  -1    1.98    0.15
   4   5  -1    1.95    0.15
   4   5  -1    2.13    0.16
   4   5  -1    2.14    0.17
   4   5  -1    2.07    0.15
   4   5  -2    6.14    0.28
   4   5  -2    6.56    0.25
   4   5  -2    6.50    0.28
   4   5  -2    6.45    0.24
   4   5  -2    6.38    0.27
   4   5  -3    7.86    0.27
   4   5  -3    7.73    0.34
   4   5  -3    8.15    0.34
   4   5  -3    8.57    0.34
   4   5  -3    8.22    0.27
   4   5  -4    5.43    0.29
   4   5  -4    5.51    0.22
   4   5  -4    5.50    0.29
   4   5  -5    0.23    0.11
   4   5  -5    0.29    0.12
  -4  -5   5    0.25    0.11
   4   5  -6    0.21    0.11
   4   5  -6    0.33    0.12
  -4  -5   6    0.25    0.11
   4   5  -7    0.51    0.16
  -4  -5   7    0.35    0.13
   4   5  -8    0.76    0.19
   5   5   5    0.35    0.17
  -5  -5  -5    0.07    0.12
   5   5   4    1.19    0.21
   5   5   4    1.57    0.24
  -5  -5  -4    1.88    0.26
   5   5   3   -0.07    0.09
   5   5   3    0.00    0.10
  -5  -5  -3    0.21    0.12
   5   5   2    0.64    0.15
   5   5   2    1.01    0.17
  -5  -5  -2    0.54    0.13
   5   5   1    0.40    0.12
   5   5   1    0.27    0.12
   5   5   1    0.44    0.12
   5   5   0    0.56    0.11
   5   5   0    0.46    0.12
   5   5   0    0.54    0.12
   5   5   0    0.61    0.13
  -5  -5   0    0.58    0.10
   5   5  -1    0.71    0.12
   5   5  -1    0.83    0.13
   5   5  -1    1.06    0.14
   5   5  -1    0.73    0.14
   5   5  -1    1.01    0.14
   5   5  -2    6.90    0.31
   5   5  -2    6.38    0.31
   5   5  -2    7.28    0.28
   5   5  -2    6.45    0.28
   5   5  -2    6.46    0.32
   5   5  -3    1.56    0.19
   5   5  -3    1.51    0.14
   5   5  -3    1.82    0.20
   5   5  -3    1.65    0.13
   5   5  -3    1.65    0.18
   5   5  -4    0.76    0.14
   5   5  -4    0.64    0.14
   5   5  -4    0.72    0.14
   5   5  -5    0.22    0.10
   5   5  -5    0.05    0.10
   5   5  -6    1.31    0.20
   5   5  -6    1.17    0.19
  -5  -5   6    0.92    0.17
   5   5  -7   -0.03    0.10
   5   5  -7    0.00    0.10
  -5  -5   7    0.04    0.09
   5   5  -8    0.09    0.13
   6   5   4    0.16    0.15
  -6  -5  -4    0.22    0.15
   6   5   3    0.04    0.11
   6   5   3    0.05    0.11
  -6  -5  -3    0.01    0.09
   6   5   2    1.60    0.23
   6   5   2    1.38    0.22
  -6  -5  -2    1.41    0.22
   6   5   1    0.66    0.16
   6   5   1    0.37    0.13
   6   5   1    0.66    0.16
   6   5   0    4.18    0.27
   6   5   0    3.60    0.26
   6   5   0    4.52    0.29
   6   5  -1    0.15    0.09
   6   5  -1   -0.01    0.04
   6   5  -1    0.01    0.08
   6   5  -1    0.05    0.08
   6   5  -1   -0.09    0.04
   6   5  -2    0.01    0.09
   6   5  -2    0.05    0.08
   6   5  -2   -0.10    0.08
   6   5  -2    0.07    0.09
   6   5  -2    0.01    0.08
   6   5  -3    0.55    0.14
   6   5  -3    0.90    0.13
   6   5  -3    0.90    0.16
   6   5  -3    0.88    0.15
   6   5  -4    0.13    0.10
   6   5  -4    0.13    0.10
   6   5  -4    0.36    0.13
   6   5  -5    0.09    0.10
   6   5  -5    0.03    0.10
   6   5  -5   -0.03    0.09
   6   5  -6    0.70    0.17
   6   5  -6    0.33    0.13
  -6  -5   6    0.57    0.15
   6   5  -7    0.19    0.13
   6   5  -7    0.05    0.11
  -6  -5   7    0.40    0.14
   6   5  -8    0.10    0.13
   6   5  -8    0.02    0.13
  -6  -5   8    0.04    0.12
   7   5   3   -0.06    0.13
  -7  -5  -3    0.20    0.14
   7   5   2    0.69    0.19
   7   5   2    0.54    0.16
  -7  -5  -2    0.28    0.14
   7   5   1    0.10    0.12
   7   5   1    0.13    0.12
   7   5   1    0.01    0.10
   7   5   0    0.03    0.09
   7   5   0    0.10    0.11
   7   5   0    0.01    0.09
   7   5  -1    1.14    0.18
   7   5  -1    1.01    0.16
   7   5  -1    1.18    0.17
   7   5  -1    1.65    0.22
   7   5  -2    2.27    0.25
   7   5  -2    2.47    0.23
   7   5  -2    2.76    0.26
   7   5  -2    2.40    0.24
   7   5  -2    2.26    0.22
   7   5  -3    0.03    0.10
   7   5  -3    0.34    0.12
   7   5  -3    0.30    0.13
   7   5  -4    0.97    0.19
   7   5  -4    0.77    0.16
   7   5  -4    0.67    0.16
   7   5  -5    0.27    0.13
   7   5  -5    0.17    0.12
   7   5  -5    0.10    0.11
   7   5  -6    0.03    0.11
   7   5  -6   -0.04    0.10
   7   5  -7    0.00    0.10
   7   5  -7   -0.11    0.11
  -7  -5   7   -0.09    0.10
   7   5  -8    0.35    0.17
   8   5   2    0.97    0.23
   8   5   1    0.57    0.17
   8   5   1    0.08    0.12
   8   5   0    0.40    0.15
   8   5   0    0.07    0.11
   8   5   0    0.12    0.11
   8   5  -1    0.25    0.12
   8   5  -1    0.03    0.10
   8   5  -1    0.21    0.12
   8   5  -2    0.26    0.13
   8   5  -2    0.42    0.14
   8   5  -3    0.22    0.13
   8   5  -3    0.11    0.12
   8   5  -3    0.34    0.13
   8   5  -4    0.05    0.11
   8   5  -4    0.16    0.11
   8   5  -4   -0.14    0.11
   8   5  -5   -0.10    0.09
   8   5  -5    0.02    0.11
   8   5  -5   -0.05    0.12
   8   5  -6    0.05    0.12
   8   5  -6    0.15    0.14
   8   5  -7    0.03    0.14
   8   5  -8    0.11    0.16
   9   5   0    1.87    0.27
   9   5  -1    0.82    0.20
   9   5  -2    0.05    0.12
   9   5  -3   -0.04    0.11
   9   5  -3   -0.01    0.10
   9   5  -4   -0.02    0.12
   9   5  -4   -0.01    0.10
   9   5  -5    0.16    0.15
   9   5  -5    0.09    0.13
   9   5  -6   -0.21    0.11
   9   5  -7    0.00    0.15
  10   5  -3    0.13    0.14
  10   5  -4    0.13    0.14
  10  -6  -4   -0.03    0.13
   9  -6  -6    0.07    0.13
   9  -6  -6    0.00    0.13
   9  -6  -5    0.08    0.13
   9  -6  -4    0.00    0.11
   9  -6  -4    0.21    0.14
   9  -6  -3    0.11    0.12
   9  -6  -3    0.25    0.15
   9  -6  -2   -0.13    0.10
   9  -6  -2    0.10    0.12
   8  -6  -7   -0.01    0.13
   8  -6  -7   -0.25    0.09
   8  -6  -6    0.05    0.12
   8  -6  -6   -0.11    0.10
   8  -6  -6   -0.08    0.11
   8  -6  -5    0.31    0.16
   8  -6  -5    0.55    0.16
   8  -6  -5    0.22    0.13
   8  -6  -4    0.21    0.13
   8  -6  -4   -0.07    0.09
   8  -6  -4    0.30    0.14
   8  -6  -3    0.20    0.13
   8  -6  -3    0.27    0.13
   8  -6  -2    0.23    0.12
   8  -6  -2    0.09    0.11
   8  -6  -1    1.87    0.23
   8  -6   0    0.40    0.15
   8  -6   0    0.44    0.15
   8  -6   1   -0.06    0.13
   8  -6   1    0.01    0.12
   8  -6   2    0.01    0.13
   7  -6  -8    0.10    0.15
   7  -6  -8    0.05    0.13
   7  -6  -7    0.06    0.11
   7  -6  -7    0.18    0.14
   7  -6  -7    0.15    0.13
   7  -6  -6    0.16    0.12
   7  -6  -6    0.27    0.13
   7  -6  -6    0.30    0.15
   7  -6  -5    0.11    0.11
   7  -6  -5    0.06    0.10
   7  -6  -5    0.00    0.08
   7  -6  -4    0.26    0.13
   7  -6  -4    0.19    0.10
   7  -6  -4    0.23    0.12
   7  -6  -3    0.43    0.13
   7  -6  -3    0.45    0.14
   7  -6  -3    0.18    0.09
   7  -6  -2    0.24    0.11
   7  -6  -2    0.11    0.09
   7  -6  -2    0.26    0.12
   7  -6  -1    0.09    0.09
   7  -6  -1   -0.07    0.08
   7  -6  -1    0.04    0.09
   7  -6  -1    0.03    0.09
   7  -6   0    0.11    0.11
   7  -6   0   -0.05    0.09
   7  -6   1    5.44    0.35
   7  -6   1    4.20    0.30
   7  -6   2   -0.04    0.11
   7  -6   2   -0.17    0.09
   7  -6   3    0.09    0.15
   6  -6  -8    0.09    0.14
   6  -6  -8    0.17    0.14
   6  -6  -7    0.19    0.13
   6  -6  -7    0.03    0.11
   6  -6  -7   -0.09    0.09
   6  -6  -6    0.07    0.10
   6  -6  -6   -0.04    0.10
   6  -6  -6    0.07    0.10
   6  -6  -5    0.12    0.10
   6  -6  -5    0.03    0.09
   6  -6  -5    0.01    0.09
   6  -6  -4    0.09    0.09
   6  -6  -4    0.04    0.08
   6  -6  -4    0.00    0.08
   6  -6  -3    1.86    0.21
   6  -6  -3    1.92    0.22
   6  -6  -2    1.62    0.18
   6  -6  -2    1.80    0.21
   6  -6  -2    1.94    0.21
   6  -6  -1    0.52    0.13
   6  -6  -1    0.64    0.12
   6  -6  -1    0.59    0.12
   6  -6  -1    0.48    0.12
   6  -6  -1    0.56    0.13
   6  -6   0    0.11    0.09
   6  -6   0    0.03    0.10
   6  -6   0    0.03    0.08
   6  -6   0    0.13    0.10
   6  -6   1    0.28    0.12
   6  -6   1    0.52    0.15
   6  -6   2   -0.02    0.10
   6  -6   2    0.01    0.11
   6  -6   3    2.51    0.31
   6  -6   3    2.36    0.30
   6  -6   4   -0.12    0.10
   5  -6  -8    0.11    0.13
   5  -6  -7    0.40    0.14
   5  -6  -7    0.59    0.15
   5  -6  -7    0.45    0.15
   5  -6  -6    0.12    0.10
   5  -6  -6    0.01    0.09
   5  -6  -6   -0.01    0.09
   5  -6  -5    0.54    0.13
   5  -6  -5    0.68    0.15
   5  -6  -5    0.28    0.12
   5  -6  -4    0.60    0.13
   5  -6  -4    0.69    0.14
   5  -6  -4    0.73    0.14
   5  -6  -3    5.75    0.30
   5  -6  -3    6.10    0.32
   5  -6  -2    2.48    0.17
   5  -6  -2    2.51    0.20
   5  -6  -2    2.60    0.16
   5  -6  -2    2.40    0.15
   5  -6  -2    3.03    0.22
   5  -6  -1    1.31    0.16
   5  -6  -1    1.32    0.14
   5  -6  -1    1.19    0.15
   5  -6  -1    1.14    0.14
   5  -6  -1    1.13    0.14
   5  -6   0    3.89    0.23
   5  -6   0    4.09    0.23
   5  -6   0    4.03    0.24
   5  -6   0    4.11    0.25
   5  -6   0    4.18    0.24
   5  -6   1    6.03    0.32
   5  -6   1    6.20    0.34
   5  -6   1    6.19    0.28
   5  -6   2    0.04    0.10
   5  -6   2    0.03    0.10
   5  -6   3    0.30    0.13
   5  -6   3    0.29    0.12
   5  -6   4    0.34    0.15
   5  -6   4    0.07    0.12
   5  -6   5    2.37    0.32
   4  -6  -8    0.10    0.13
   4  -6  -7   -0.07    0.11
   4  -6  -6    0.11    0.10
   4  -6  -6    0.06    0.10
   4  -6  -6   -0.01    0.08
   4  -6  -5    3.23    0.25
   4  -6  -5    3.20    0.23
   4  -6  -5    3.20    0.24
   4  -6  -4   -0.05    0.07
   4  -6  -4   -0.05    0.07
   4  -6  -4   -0.01    0.08
   4  -6  -3    0.13    0.07
   4  -6  -3   -0.03    0.06
   4  -6  -3    0.11    0.07
   4  -6  -2   21.16    0.59
   4  -6  -2   22.06    0.63
   4  -6  -2   21.57    0.63
   4  -6  -2   22.27    0.51
   4  -6  -1    9.24    0.30
   4  -6  -1    9.91    0.35
   4  -6  -1    8.77    0.34
   4  -6  -1    8.77    0.31
   4  -6  -1    9.05    0.31
   4  -6   0    0.80    0.11
   4  -6   0    0.76    0.11
   4  -6   0    0.54    0.10
   4  -6   0    0.76    0.10
   4  -6   0    0.49    0.09
   4  -6   1    0.02    0.06
   4  -6   1    0.04    0.08
   4  -6   1    0.03    0.08
   4  -6   1    0.02    0.06
  -4   6  -2    1.92    0.16
   4  -6   2    1.82    0.21
   4  -6   2    2.44    0.25
   4  -6   3    5.11    0.31
   4  -6   3    4.93    0.32
   4  -6   4    0.09    0.11
   4  -6   4    0.20    0.12
   4  -6   5    0.34    0.16
   4  -6   5    0.47    0.17
   4  -6   6    0.39    0.18
   3  -6  -8   -0.07    0.12
   3  -6  -7    0.55    0.17
   3  -6  -6    0.24    0.10
   3  -6  -6    0.31    0.12
   3  -6  -6    0.16    0.08
   3  -6  -5    0.13    0.09
   3  -6  -5    0.30    0.12
   3  -6  -5    0.18    0.09
   3  -6  -4    0.01    0.07
   3  -6  -4   -0.08    0.06
   3  -6  -4    0.03    0.07
   3  -6  -3   17.26    0.52
   3  -6  -3   17.44    0.51
   3  -6  -3   17.01    0.51
  -3   6   2    6.60    0.19
   3  -6  -2    6.97    0.28
   3  -6  -2    6.47    0.27
   3  -6  -2    6.42    0.24
   3  -6  -1    2.19    0.12
   3  -6  -1    1.99    0.12
   3  -6  -1    1.92    0.14
   3  -6  -1    2.21    0.12
   3  -6  -1    2.15    0.16
   3  -6   0    0.96    0.09
   3  -6   0    0.97    0.11
   3  -6   0    1.09    0.11
   3  -6   0    0.96    0.11
   3  -6   0    0.98    0.12
  -3   6  -1    0.01    0.04
   3  -6   1    0.11    0.07
   3  -6   1    0.09    0.06
   3  -6   1    0.18    0.06
   3  -6   1    0.05    0.07
  -3   6  -2    1.01    0.12
   3  -6   2    0.89    0.14
   3  -6   2    1.00    0.15
   3  -6   2    1.01    0.11
   3  -6   2    1.04    0.11
  -3   6  -3    4.51    0.24
   3  -6   3    4.60    0.30
   3  -6   3    4.49    0.28
  -3   6  -4    0.62    0.13
   3  -6   4    0.23    0.12
   3  -6   4    0.27    0.12
   3  -6   5    2.24    0.27
   3  -6   5    2.84    0.30
   3  -6   6    0.04    0.13
   3  -6   6    0.01    0.12
   2  -6  -8    0.18    0.15
   2  -6  -7    1.62    0.24
   2  -6  -6    1.21    0.20
   2  -6  -5    4.47    0.28
   2  -6  -5    3.87    0.22
   2  -6  -5    4.30    0.22
  -2   6   4    8.15    0.23
   2  -6  -4    7.65    0.33
   2  -6  -4    7.70    0.29
   2  -6  -4    7.86    0.29
  -2   6   3    1.67    0.08
   2  -6  -3    1.77    0.15
   2  -6  -3    1.72    0.13
   2  -6  -3    1.49    0.13
  -2   6   2    2.29    0.09
   2  -6  -2    1.94    0.14
   2  -6  -2    1.55    0.13
  -2   6   1   20.24    0.47
   2  -6  -1   19.26    0.51
   2  -6  -1   20.39    0.53
   2  -6  -1   19.79    0.48
   2  -6   0    4.00    0.13
   2  -6   0    4.24    0.18
   2  -6   0    4.01    0.18
   2  -6   0    4.36    0.17
  -2   6  -1   29.90    0.67
   2  -6   1   28.69    0.72
   2  -6   1   28.77    0.69
   2  -6   1   29.21    0.69
   2  -6   1   28.92    0.71
  -2   6  -2    7.82    0.26
   2  -6   2    7.44    0.30
   2  -6   2    7.19    0.24
   2  -6   2    7.49    0.24
  -2   6  -3   10.03    0.35
   2  -6   3    9.57    0.39
   2  -6   3    9.29    0.38
   2  -6   3   10.05    0.29
  -2   6  -4    2.67    0.21
   2  -6   4    2.83    0.23
   2  -6   4    2.24    0.24
  -2   6  -5    3.57    0.26
   2  -6   5    3.46    0.27
   2  -6   5    3.37    0.28
   2  -6   6   -0.02    0.11
  -2   6  -7    1.67    0.26
   2  -6   7    1.80    0.27
   1  -6  -7    0.17    0.13
   1  -6  -6    1.28    0.20
  -1   6   5    5.33    0.24
   1  -6  -5    5.57    0.32
  -1   6   4    0.01    0.05
  -1   6   4    0.00    0.05
   1  -6  -4    0.16    0.06
   1  -6  -4    0.04    0.05
   1  -6  -4    0.03    0.07
  -1   6   3   15.11    0.38
  -1   6   3   14.98    0.37
   1  -6  -3   14.67    0.40
   1  -6  -3   14.25    0.40
   1  -6  -3   14.41    0.46
  -1   6   2   27.48    0.60
   1  -6  -2   26.43    0.67
   1  -6  -2   26.99    0.65
   1  -6  -2   27.44    0.64
  -1   6   1    5.50    0.17
   1  -6  -1    5.52    0.17
   1  -6  -1    5.11    0.19
   1  -6  -1    4.99    0.19
  -1   6   0    3.21    0.14
   1  -6   0    3.12    0.15
  -1   6  -1    5.06    0.20
  -1   6  -1    5.19    0.15
   1  -6   1    4.55    0.18
   1  -6   1    4.97    0.18
   1  -6   1    5.29    0.19
  -1   6  -2    0.02    0.04
   1  -6   2    0.03    0.06
   1  -6   2    0.11    0.05
   1  -6   2    0.00    0.04
  -1   6  -3    1.64    0.14
   1  -6   3    1.44    0.15
   1  -6   3    1.19    0.14
   1  -6   3    1.39    0.11
   1  -6   3    1.44    0.11
  -1   6  -4    0.07    0.08
   1  -6   4   -0.01    0.07
   1  -6   4    0.00    0.08
  -1   6  -5   16.43    0.58
   1  -6   5   16.25    0.57
  -1   6  -6   -0.11    0.09
  -1   6  -6   -0.06    0.08
   1  -6   6    0.09    0.11
  -1   6  -7    0.36    0.14
   1  -6   7    0.42    0.16
   0  -6  -7    2.97    0.33
   0  -6  -6    0.82    0.17
   0   6   5    1.66    0.17
   0   6   5    1.37    0.16
   0  -6  -5    1.37    0.20
   0   6   4    1.23    0.14
   0   6   4    1.12    0.13
   0  -6  -4    1.27    0.17
   0   6   3   19.28    0.51
   0   6   3   18.35    0.49
   0  -6  -3   19.14    0.45
   0  -6  -3   18.28    0.56
   0   6   2    0.06    0.04
   0   6   2   -0.03    0.03
   0  -6  -2    0.03    0.05
   0  -6  -2   -0.03    0.03
   0   6   1   17.97    0.44
   0  -6  -1   18.77    0.44
   0  -6  -1   18.13    0.46
   0   6   0    8.99    0.23
   0   6   0    9.21    0.26
   0   6  -1   18.35    0.46
   0   6  -1   18.09    0.44
   0   6  -1   17.85    0.41
   0  -6   1   17.66    0.45
   0  -6   1   18.14    0.45
   0   6  -2    0.03    0.04
   0   6  -2   -0.01    0.03
   0   6  -2    0.02    0.05
   0  -6   2    0.07    0.05
   0  -6   2    0.05    0.05
   0   6  -3   19.82    0.53
   0   6  -3   19.41    0.54
   0  -6   3   19.05    0.52
   0  -6   3   18.76    0.49
   0  -6   3   18.73    0.50
   0   6  -4    1.19    0.15
   0   6  -4    1.35    0.16
   0  -6   4    1.45    0.13
   0  -6   4    1.25    0.12
   0  -6   4    1.19    0.15
   0   6  -5    1.55    0.19
   0   6  -5    1.34    0.17
   0  -6   5    1.27    0.17
   0   6  -6    1.12    0.18
   0   6  -6    0.68    0.15
   0  -6   6    0.62    0.15
   0   6  -7    3.39    0.29
   0  -6   7    2.72    0.28
  -1  -6  -7    0.26    0.15
   1   6   6    0.06    0.10
   1   6   6    0.10    0.10
  -1  -6  -6   -0.05    0.10
   1   6   5   17.05    0.55
   1   6   5   16.17    0.55
  -1  -6  -5   16.40    0.62
   1   6   4    0.03    0.08
   1   6   4    0.09    0.08
  -1  -6  -4    0.13    0.09
   1   6   3    1.61    0.15
   1   6   3    1.34    0.14
  -1  -6  -3    1.47    0.16
  -1  -6  -3    1.63    0.07
   1   6   2   -0.02    0.04
   1   6   2    0.11    0.06
  -1  -6  -2    0.02    0.03
  -1  -6  -2    0.05    0.05
   1   6   1    5.22    0.19
   1   6   1    4.84    0.19
  -1  -6  -1    5.23    0.17
  -1  -6  -1    5.14    0.21
   1   6   0    3.40    0.15
   1   6   0    3.25    0.14
   1   6   0    3.40    0.14
  -1  -6   0    3.23    0.14
   1   6  -1    5.40    0.19
   1   6  -1    5.53    0.20
   1   6  -1    5.32    0.18
  -1  -6   1    5.31    0.20
  -1  -6   1    5.47    0.20
   1   6  -2   27.51    0.65
   1   6  -2   26.77    0.64
   1   6  -2   26.45    0.61
  -1  -6   2   26.55    0.65
  -1  -6   2   25.71    0.64
   1   6  -4    0.11    0.07
   1   6  -4    0.19    0.08
   1   6  -4    0.12    0.07
  -1  -6   4    0.11    0.07
  -1  -6   4    0.13    0.06
   1   6  -5    5.95    0.29
   1   6  -5    5.72    0.31
   1   6  -5    6.12    0.29
  -1  -6   5    5.92    0.26
  -1  -6   5    5.51    0.25
   1   6  -6    1.50    0.18
   1   6  -6    1.33    0.19
   1   6  -6    1.32    0.18
   1   6  -7    0.05    0.12
   1   6  -8    0.11    0.14
   2   6   7    1.42    0.23
   2   6   6   -0.01    0.10
   2   6   6    0.07    0.10
  -2  -6  -6   -0.06    0.11
   2   6   5    2.93    0.23
   2   6   5    3.33    0.25
  -2  -6  -5    2.85    0.25
   2   6   4    2.05    0.22
   2   6   4    2.56    0.24
  -2  -6  -4    2.77    0.23
   2   6   3    8.88    0.36
   2   6   3    9.53    0.38
  -2  -6  -3    9.66    0.39
   2   6   2    7.37    0.29
   2   6   2    6.99    0.29
  -2  -6  -2    7.43    0.20
  -2  -6  -2    7.40    0.31
   2   6   1   27.08    0.69
   2   6   1   26.49    0.71
   2   6   1   28.29    0.68
  -2  -6  -1   28.00    0.63
   2   6   0    4.13    0.19
   2   6   0    3.92    0.18
   2   6   0    4.21    0.18
  -2  -6   0    3.84    0.16
  -2  -6   0    4.04    0.16
   2   6  -1   18.93    0.51
   2   6  -1   18.59    0.47
   2   6  -1   19.88    0.49
  -2  -6   1   19.31    0.50
  -2  -6   1   18.79    0.50
   2   6  -2    2.19    0.13
   2   6  -2    2.23    0.14
   2   6  -2    2.24    0.12
  -2  -6   2    2.12    0.14
  -2  -6   2    1.88    0.13
   2   6  -3    1.85    0.13
   2   6  -3    1.76    0.14
   2   6  -3    1.69    0.12
  -2  -6   3    1.63    0.13
  -2  -6   3    1.66    0.13
   2   6  -5    4.58    0.24
   2   6  -5    4.83    0.24
   2   6  -5    4.12    0.27
  -2  -6   5    4.00    0.23
  -2  -6   5    4.29    0.23
   2   6  -6    1.03    0.17
   2   6  -7    1.71    0.24
   2   6  -8    0.05    0.12
   3   6   6    0.22    0.14
   3   6   6   -0.11    0.10
  -3  -6  -6    0.08    0.12
   3   6   5    2.60    0.28
   3   6   5    3.20    0.30
  -3  -6  -5    1.95    0.26
   3   6   4    0.09    0.09
   3   6   4    0.33    0.12
  -3  -6  -4    0.30    0.12
   3   6   3    4.85    0.28
   3   6   3    4.33    0.27
  -3  -6  -3    4.73    0.29
   3   6   2    0.93    0.14
   3   6   2    0.94    0.14
  -3  -6  -2    0.74    0.13
   3   6   1    0.06    0.06
   3   6   1    0.09    0.07
   3   6   1    0.23    0.08
  -3  -6  -1    0.04    0.05
  -3  -6  -1    0.02    0.05
   3   6   0    0.98    0.11
   3   6   0    1.11    0.12
   3   6   0    0.74    0.11
  -3  -6   0    1.02    0.10
   3   6  -1    2.08    0.13
   3   6  -1    2.04    0.13
   3   6  -1    1.94    0.14
   3   6  -1    1.82    0.13
  -3  -6   1    1.69    0.12
   3   6  -2    6.01    0.23
   3   6  -2    6.55    0.26
   3   6  -2    6.44    0.23
   3   6  -2    6.33    0.27
  -3  -6   2    6.36    0.26
   3   6  -3   16.61    0.43
   3   6  -3   16.49    0.45
   3   6  -3   17.55    0.51
   3   6  -3   16.15    0.51
  -3  -6   3   16.45    0.50
   3   6  -4    0.04    0.06
   3   6  -4    0.10    0.06
   3   6  -4    0.04    0.07
  -3  -6   4    0.06    0.07
   3   6  -5    0.14    0.08
   3   6  -5    0.21    0.10
  -3  -6   5    0.16    0.09
   3   6  -6    0.20    0.11
  -3  -6   6    0.15    0.09
  -3  -6   6    0.09    0.09
   3   6  -7    0.89    0.18
   3   6  -8    0.00    0.11
   4   6   6    0.21    0.15
   4   6   5    0.51    0.16
   4   6   5    0.64    0.17
  -4  -6  -5    0.70    0.18
   4   6   4    0.05    0.10
   4   6   4    0.00    0.10
  -4  -6  -4    0.38    0.13
   4   6   3    4.86    0.30
   4   6   3    5.24    0.32
  -4  -6  -3    5.65    0.34
   4   6   2    2.04    0.22
   4   6   2    2.22    0.22
  -4  -6  -2    2.09    0.22
   4   6   1    0.07    0.08
   4   6   1    0.00    0.07
   4   6   1    0.10    0.08
  -4  -6  -1   -0.02    0.05
  -4  -6  -1   -0.10    0.04
   4   6   0    0.68    0.12
   4   6   0    0.68    0.10
   4   6   0    0.78    0.12
   4   6   0    0.66    0.12
  -4  -6   0    0.72    0.10
   4   6  -1    8.61    0.35
   4   6  -1    9.11    0.33
   4   6  -1    9.60    0.33
   4   6  -1    8.92    0.33
  -4  -6   1    8.85    0.32
   4   6  -2   21.10    0.63
   4   6  -2   20.69    0.54
   4   6  -2   21.36    0.57
   4   6  -2   21.58    0.61
  -4  -6   2   20.74    0.60
   4   6  -3    0.12    0.06
   4   6  -3    0.08    0.07
   4   6  -3    0.07    0.06
   4   6  -3   -0.07    0.07
  -4  -6   3    0.13    0.07
   4   6  -4    0.01    0.06
   4   6  -4    0.06    0.08
   4   6  -4    0.03    0.07
   4   6  -4    0.16    0.07
  -4  -6   4    0.10    0.08
   4   6  -5    3.07    0.24
   4   6  -5    2.98    0.23
  -4  -6   5    3.35    0.24
   4   6  -6   -0.21    0.06
   4   6  -6   -0.05    0.08
  -4  -6   6    0.00    0.08
   4   6  -7    0.15    0.12
  -4  -6   7    0.03    0.10
  -4  -6   7    0.16    0.11
   4   6  -8    0.33    0.14
   5   6   5    2.28    0.30
   5   6   4    0.10    0.12
   5   6   4    0.19    0.13
  -5  -6  -4    0.06    0.11
   5   6   3    0.09    0.10
   5   6   3    0.14    0.11
  -5  -6  -3    0.25    0.11
   5   6   2    0.22    0.12
   5   6   2    0.04    0.10
  -5  -6  -2    0.31    0.11
   5   6   1    5.88    0.33
   5   6   1    6.18    0.33
   5   6   1    5.49    0.31
   5   6   0    3.86    0.21
   5   6   0    3.94    0.26
   5   6   0    4.13    0.25
   5   6   0    3.48    0.24
  -5  -6   0    4.24    0.22
   5   6  -1    1.07    0.16
   5   6  -1    1.08    0.15
   5   6  -1    1.11    0.15
   5   6  -1    0.86    0.14
  -5  -6   1    1.24    0.15
   5   6  -2    2.49    0.20
   5   6  -2    2.33    0.17
   5   6  -2    2.26    0.20
   5   6  -2    2.57    0.17
   5   6  -3    6.28    0.32
   5   6  -3    6.57    0.26
   5   6  -3    6.16    0.25
   5   6  -3    6.47    0.32
   5   6  -4    0.65    0.14
   5   6  -4    0.68    0.14
   5   6  -5    0.49    0.14
   5   6  -5    0.70    0.16
  -5  -6   5    0.70    0.15
   5   6  -6    0.01    0.10
   5   6  -6    0.06    0.09
  -5  -6   6    0.03    0.10
   5   6  -7    0.48    0.15
   5   6  -7    0.55    0.16
  -5  -6   7    0.78    0.17
   5   6  -8   -0.04    0.11
   6   6   4    0.09    0.14
   6   6   3    2.07    0.28
   6   6   3    2.26    0.30
  -6  -6  -3    1.93    0.26
   6   6   2    0.12    0.12
   6   6   2    0.12    0.11
  -6  -6  -2    0.01    0.08
   6   6   1    0.32    0.13
   6   6   1    0.69    0.16
   6   6   1    0.48    0.14
   6   6   0    0.04    0.09
   6   6   0    0.04    0.09
   6   6   0    0.04    0.09
   6   6  -1    0.80    0.15
   6   6  -1    0.61    0.14
   6   6  -1    0.58    0.13
  -6  -6   1    0.62    0.13
   6   6  -2    1.99    0.19
   6   6  -2    1.87    0.20
   6   6  -2    2.00    0.22
   6   6  -2    2.19    0.22
   6   6  -3    1.83    0.22
   6   6  -3    2.33    0.18
   6   6  -3    1.93    0.22
   6   6  -3    2.20    0.17
   6   6  -3    2.36    0.25
   6   6  -4    0.05    0.09
   6   6  -4    0.00    0.08
   6   6  -5    0.00    0.09
   6   6  -5    0.04    0.10
  -6  -6   5    0.08    0.10
   6   6  -6    0.06    0.11
   6   6  -6    0.02    0.10
  -6  -6   6    0.21    0.12
   6   6  -7   -0.14    0.08
   6   6  -7   -0.07    0.11
  -6  -6   7   -0.11    0.09
   6   6  -8    0.11    0.14
  -6  -6   8    0.17    0.14
   7   6   3    0.18    0.16
   7   6   2    0.04    0.12
   7   6   2    0.14    0.13
  -7  -6  -2    0.06    0.10
   7   6   1    4.52    0.33
   7   6   1    4.08    0.32
   7   6   1    4.47    0.33
   7   6   0    0.16    0.11
   7   6   0   -0.04    0.09
   7   6   0    0.04    0.10
   7   6  -1    0.08    0.09
   7   6  -1    0.08    0.09
   7   6  -1    0.04    0.09
   7   6  -1   -0.10    0.08
  -7  -6   1   -0.07    0.08
   7   6  -2    0.39    0.11
   7   6  -2    0.07    0.10
   7   6  -2    0.32    0.13
   7   6  -2    0.19    0.10
   7   6  -3    0.53    0.14
   7   6  -3    0.65    0.15
   7   6  -4    0.18    0.10
   7   6  -4    0.35    0.14
   7   6  -5   -0.04    0.10
   7   6  -5    0.05    0.10
   7   6  -6    0.17    0.13
   7   6  -6    0.14    0.12
  -7  -6   6    0.17    0.12
   7   6  -7    0.17    0.14
   7   6  -7    0.06    0.11
  -7  -6   7   -0.03    0.11
   7   6  -8   -0.03    0.13
   8   6   2   -0.17    0.12
   8   6   1    0.10    0.14
   8   6   1    0.18    0.15
   8   6   0    0.43    0.15
   8   6   0    0.57    0.17
   8   6   0    0.57    0.17
   8   6  -1    1.99    0.25
   8   6  -1    1.87    0.25
   8   6  -1    1.90    0.24
   8   6  -2    0.26    0.13
   8   6  -2    0.20    0.12
  -8  -6   2    0.23    0.12
   8   6  -3    0.17    0.12
   8   6  -3    0.28    0.13
  -8  -6   3    0.09    0.11
   8   6  -4    0.23    0.13
   8   6  -4    0.13    0.14
   8   6  -5    0.51    0.16
   8   6  -5    0.25    0.14
  -8  -6   5    0.20    0.14
   8   6  -6    0.03    0.12
   8   6  -6   -0.01    0.12
  -8  -6   6   -0.05    0.12
   8   6  -7    0.15    0.15
   9   6   0    0.92    0.21
   9   6  -1   -0.07    0.12
   9   6  -1    0.11    0.14
   9   6  -2    0.03    0.12
   9   6  -3   -0.12    0.11
   9   6  -3    0.14    0.12
  -9  -6   3    0.13    0.11
   9   6  -4   -0.09    0.10
   9   6  -4    0.00    0.13
  -9  -6   4    0.03    0.13
   9   6  -5    0.16    0.14
   9   6  -6    0.22    0.17
  10   6  -4    0.01    0.13
   9  -7  -6   -0.10    0.10
   9  -7  -6   -0.01    0.13
   9  -7  -5   -0.08    0.11
   9  -7  -4   -0.04    0.12
   9  -7  -4   -0.04    0.11
   9  -7  -3    0.06    0.12
   9  -7  -3   -0.07    0.11
   9  -7  -2    0.06    0.12
   9  -7  -2    0.01    0.13
   8  -7  -7    0.00    0.13
   8  -7  -7    0.21    0.14
   8  -7  -6    0.17    0.12
   8  -7  -6    0.22    0.14
   8  -7  -6    0.11    0.13
   8  -7  -5    0.90    0.18
   8  -7  -5    0.97    0.20
   8  -7  -5    0.74    0.19
   8  -7  -4    0.33    0.15
   8  -7  -4    0.38    0.15
   8  -7  -3    0.11    0.12
   8  -7  -3   -0.03    0.10
   8  -7  -2   -0.02    0.09
   8  -7  -2   -0.03    0.10
   8  -7  -1    0.04    0.06
   8  -7   0    0.39    0.14
   8  -7   0    0.22    0.13
   8  -7   1    0.04    0.12
   8  -7   1    0.21    0.13
   8  -7   2    0.01    0.14
   7  -7  -8    0.75    0.19
   7  -7  -8    0.73    0.20
   7  -7  -7   -0.10    0.10
   7  -7  -7    0.03    0.12
   7  -7  -7    0.09    0.12
   7  -7  -6    0.10    0.11
   7  -7  -6    0.02    0.10
   7  -7  -6    0.00    0.11
   7  -7  -5    0.13    0.12
   7  -7  -5    0.28    0.12
   7  -7  -5    0.34    0.14
   7  -7  -4    0.04    0.10
   7  -7  -4    0.19    0.10
   7  -7  -4    0.23    0.12
   7  -7  -3    1.92    0.21
   7  -7  -3    1.84    0.22
   7  -7  -3    1.85    0.24
   7  -7  -2    2.31    0.24
   7  -7  -2    2.55    0.26
   7  -7  -1    0.01    0.09
   7  -7  -1    0.12    0.10
   7  -7  -1    0.15    0.09
   7  -7  -1    0.30    0.11
   7  -7   0    1.11    0.20
   7  -7   0    1.36    0.20
   7  -7   1   -0.07    0.10
   7  -7   1   -0.06    0.11
   7  -7   2    0.16    0.13
   7  -7   2    0.16    0.15
   7  -7   3    0.09    0.15
   6  -7  -8    0.10    0.14
   6  -7  -7   -0.05    0.11
   6  -7  -7   -0.08    0.10
   6  -7  -7    0.05    0.11
   6  -7  -6    0.70    0.17
   6  -7  -6    1.14    0.20
   6  -7  -6    0.64    0.16
   6  -7  -5    0.16    0.11
   6  -7  -5    0.43    0.12
   6  -7  -5    0.22    0.12
   6  -7  -4    0.35    0.12
   6  -7  -4    0.39    0.12
   6  -7  -4    0.34    0.13
   6  -7  -3   -0.05    0.09
   6  -7  -3    0.02    0.07
   6  -7  -3   -0.01    0.09
   6  -7  -2    1.51    0.17
   6  -7  -2    1.39    0.19
   6  -7  -2    1.61    0.20
   6  -7  -1    1.62    0.17
   6  -7  -1    1.34    0.17
   6  -7  -1    1.46    0.19
   6  -7  -1    1.76    0.20
   6  -7  -1    1.85    0.19
   6  -7   0    6.85    0.33
   6  -7   0    6.57    0.33
   6  -7   0    6.63    0.35
   6  -7   0    7.15    0.33
   6  -7   1   -0.03    0.09
   6  -7   1   -0.02    0.10
   6  -7   2   -0.09    0.09
   6  -7   2    0.02    0.10
   6  -7   3    0.11    0.13
   6  -7   3    0.12    0.13
   6  -7   4    0.23    0.17
   5  -7  -8   -0.12    0.12
   5  -7  -7    0.03    0.10
   5  -7  -7    0.02    0.10
   5  -7  -7    0.14    0.11
   5  -7  -6    0.61    0.16
   5  -7  -6    0.46    0.13
   5  -7  -6    0.82    0.16
   5  -7  -5    0.08    0.10
   5  -7  -5    0.18    0.10
   5  -7  -5    0.15    0.10
   5  -7  -4    4.80    0.30
   5  -7  -4    4.53    0.28
   5  -7  -4    5.57    0.29
   5  -7  -3    3.37    0.24
   5  -7  -3    3.56    0.24
   5  -7  -3    4.05    0.23
   5  -7  -2    4.68    0.22
   5  -7  -2    4.99    0.21
   5  -7  -2    4.79    0.28
   5  -7  -2    4.49    0.27
   5  -7  -2    5.13    0.25
   5  -7  -1    4.77    0.24
   5  -7  -1    5.23    0.25
   5  -7  -1    4.70    0.26
   5  -7  -1    4.94    0.28
   5  -7  -1    4.51    0.23
   5  -7   0   10.61    0.40
   5  -7   0   10.91    0.42
   5  -7   0   10.67    0.40
   5  -7   0   10.65    0.40
   5  -7   0   10.53    0.37
   5  -7   1   -0.11    0.07
   5  -7   1    0.02    0.10
   5  -7   1    0.10    0.10
   5  -7   1   -0.04    0.07
   5  -7   2    4.32    0.30
   5  -7   2    3.55    0.26
   5  -7   3    0.27    0.14
   5  -7   3    0.15    0.12
   5  -7   4    0.79    0.19
   5  -7   4    0.77    0.20
   5  -7   5   -0.03    0.14
   4  -7  -8   -0.19    0.11
   4  -7  -7   -0.07    0.10
   4  -7  -6    0.02    0.08
   4  -7  -6    0.09    0.09
   4  -7  -6    0.01    0.09
   4  -7  -5   -0.06    0.07
   4  -7  -5   -0.09    0.08
   4  -7  -5    0.07    0.09
   4  -7  -4    0.10    0.08
   4  -7  -4   -0.13    0.07
   4  -7  -4    0.06    0.08
   4  -7  -3   -0.01    0.06
   4  -7  -3    0.02    0.03
   4  -7  -3    0.13    0.08
  -4   7   2   34.16    0.75
   4  -7  -2   33.22    0.73
   4  -7  -2   32.30    0.87
   4  -7  -2   32.51    0.83
   4  -7  -2   32.48    0.86
   4  -7  -1    3.77    0.19
   4  -7  -1    3.41    0.21
   4  -7  -1    3.70    0.18
   4  -7  -1    3.48    0.22
   4  -7  -1    3.57    0.17
   4  -7   0    0.44    0.08
   4  -7   0    0.45    0.10
   4  -7   0    0.49    0.10
  -4   7  -1    0.80    0.10
   4  -7   1    0.78    0.12
   4  -7   1    0.84    0.14
   4  -7   1    1.04    0.15
   4  -7   1    0.74    0.11
  -4   7  -2    4.00    0.22
   4  -7   2    4.30    0.29
   4  -7   2    4.45    0.27
   4  -7   3   -0.08    0.09
   4  -7   3    0.07    0.10
   4  -7   4    0.25    0.14
   4  -7   4    0.73    0.18
   4  -7   5    0.23    0.15
   4  -7   5    0.12    0.15
   4  -7   6    0.02    0.14
   3  -7  -8    0.17    0.15
   3  -7  -7    0.02    0.11
   3  -7  -6    0.13    0.09
   3  -7  -6    0.40    0.13
   3  -7  -6    0.37    0.11
   3  -7  -5    3.98    0.24
   3  -7  -5    4.71    0.26
   3  -7  -5    5.10    0.30
   3  -7  -4    1.67    0.17
   3  -7  -4    2.15    0.16
   3  -7  -4    1.95    0.20
   3  -7  -3    1.64    0.14
   3  -7  -3    1.13    0.14
   3  -7  -3    1.28    0.14
  -3   7   2    4.36    0.15
   3  -7  -2    4.46    0.22
   3  -7  -2    4.63    0.20
   3  -7  -2    4.46    0.22
  -3   7   1    9.19    0.28
   3  -7  -1    9.37    0.33
   3  -7  -1    9.30    0.28
   3  -7  -1    8.65    0.27
   3  -7  -1    9.04    0.32
   3  -7   0   15.57    0.46
   3  -7   0   15.23    0.40
   3  -7   0   15.31    0.45
   3  -7   0   15.61    0.44
   3  -7   0   15.46    0.46
  -3   7  -1   13.26    0.38
   3  -7   1   13.35    0.41
   3  -7   1   13.06    0.40
   3  -7   1   14.14    0.45
   3  -7   1   13.98    0.44
  -3   7  -2    0.75    0.10
   3  -7   2    0.53    0.09
   3  -7   2    0.77    0.10
   3  -7   2    0.68    0.13
   3  -7   2    0.41    0.11
  -3   7  -3    0.78    0.12
   3  -7   3    0.67    0.15
   3  -7   3    0.87    0.16
   3  -7   4    0.94    0.18
   3  -7   4    0.61    0.16
   3  -7   5    0.27    0.15
   3  -7   5    0.06    0.12
   3  -7   6   -0.01    0.12
   2  -7  -8    0.13    0.14
   2  -7  -7    1.07    0.20
   2  -7  -6    2.24    0.25
   2  -7  -5    1.72    0.15
   2  -7  -5    1.44    0.19
   2  -7  -5    1.57    0.16
  -2   7   4    0.26    0.06
   2  -7  -4    0.25    0.09
   2  -7  -4    0.32    0.08
  -2   7   3   14.42    0.34
   2  -7  -3   14.30    0.43
   2  -7  -3   14.46    0.43
   2  -7  -3   14.13    0.44
  -2   7   2   51.02    1.06
   2  -7  -2   50.62    1.16
   2  -7  -2   50.19    1.15
   2  -7  -2   51.26    1.16
  -2   7   1   33.71    0.74
   2  -7  -1   33.41    0.80
   2  -7  -1   32.74    0.75
   2  -7  -1   32.44    0.80
  -2   7   0   29.84    0.70
   2  -7   0   29.20    0.71
   2  -7   0   29.93    0.68
   2  -7   0   29.24    0.72
   2  -7   0   28.98    0.64
  -2   7  -1    4.30    0.15
   2  -7   1    4.84    0.21
   2  -7   1    4.44    0.19
   2  -7   1    4.20    0.18
   2  -7   1    4.45    0.21
  -2   7  -2    1.06    0.10
   2  -7   2    1.15    0.15
   2  -7   2    1.15    0.14
   2  -7   2    1.24    0.11
   2  -7   2    1.13    0.11
  -2   7  -3   16.16    0.48
   2  -7   3   15.50    0.42
   2  -7   3   14.56    0.51
  -2   7  -4    3.13    0.21
   2  -7   4    2.40    0.25
   2  -7   4    2.84    0.24
   2  -7   5    0.07    0.10
   2  -7   5    0.02    0.10
  -2   7  -6    0.62    0.17
   2  -7   6    0.40    0.16
  -2   7  -7    0.15    0.14
   2  -7   7    0.11    0.15
   1  -7  -7    0.05    0.12
   1  -7  -6    2.17    0.25
  -1   7   5    1.45    0.15
   1  -7  -5    1.25    0.19
  -1   7   4   19.44    0.50
  -1   7   4   19.65    0.51
   1  -7  -4   18.82    0.51
   1  -7  -4   19.78    0.62
   1  -7  -4   19.42    0.51
  -1   7   3   18.27    0.45
  -1   7   3   18.62    0.47
   1  -7  -3   18.44    0.55
   1  -7  -3   18.25    0.49
   1  -7  -3   18.31    0.49
  -1   7   2   10.65    0.28
   1  -7  -2   10.56    0.33
   1  -7  -2   10.41    0.32
   1  -7  -2   10.19    0.31
  -1   7   1   11.22    0.30
   1  -7  -1   10.97    0.32
   1  -7  -1   10.98    0.29
   1  -7  -1   11.11    0.32
  -1   7   0  176.99    3.49
  -1   7   0  171.58    3.38
   1  -7   0  172.56    3.52
   1  -7   0  168.72    3.55
  -1   7  -1    2.07    0.13
  -1   7  -2   28.99    0.68
  -1   7  -2   28.18    0.74
   1  -7   2   28.67    0.69
   1  -7   2   28.96    0.68
   1  -7   2   28.98    0.71
  -1   7  -3   -0.03    0.05
  -1   7  -3   -0.02    0.06
   1  -7   3    0.08    0.05
   1  -7   3    0.07    0.05
   1  -7   3   -0.09    0.06
  -1   7  -4    1.32    0.16
   1  -7   4    1.37    0.17
  -1   7  -5    4.85    0.29
  -1   7  -5    4.59    0.30
   1  -7   5    4.48    0.28
  -1   7  -6    1.39    0.21
  -1   7  -6    1.25    0.19
   1  -7   6    1.14    0.19
  -1   7  -7    0.51    0.15
   1  -7   7    0.48    0.17
   0  -7  -7    0.05    0.12
   0  -7  -6   -0.09    0.09
   0   7   5    0.61    0.12
   0   7   5    0.43    0.11
   0  -7  -5    0.40    0.13
   0   7   4   10.80    0.37
   0   7   4   10.12    0.35
   0  -7  -4   10.83    0.43
   0   7   3    0.54    0.08
   0   7   3    0.48    0.08
   0  -7  -3    0.61    0.10
   0  -7  -3    0.50    0.07
   0  -7  -3    0.40    0.06
   0   7   2   69.67    1.45
   0   7   2   70.27    1.50
   0  -7  -2   71.46    1.48
   0  -7  -2   70.23    1.58
   0  -7  -2   70.11    1.50
   0   7   1    2.44    0.12
   0   7   1    2.27    0.12
   0  -7  -1    2.34    0.12
   0  -7  -1    2.10    0.12
   0   7   0   -0.03    0.05
   0   7   0   -0.04    0.05
   0   7   0    0.05    0.03
   0  -7   0   -0.05    0.04
   0  -7   0   -0.06    0.04
   0   7  -1    2.26    0.09
   0   7  -1    2.23    0.13
   0   7  -1    2.33    0.13
   0  -7   1    2.35    0.13
   0  -7   1    2.16    0.13
   0   7  -2   69.99    1.46
   0   7  -2   70.42    1.51
   0   7  -2   71.67    1.50
   0  -7   2   67.22    1.49
   0  -7   2   67.14    1.50
   0   7  -3    0.54    0.08
   0   7  -3    0.39    0.09
   0  -7   3    0.43    0.09
   0  -7   3    0.64    0.09
   0  -7   3    0.49    0.08
   0   7  -4   10.23    0.39
   0   7  -4   11.08    0.39
   0  -7   4   10.58    0.35
   0  -7   4   10.23    0.38
   0  -7   4   10.79    0.35
   0   7  -5    0.55    0.13
   0   7  -5    0.69    0.14
   0  -7   5    0.44    0.12
   0   7  -6   -0.01    0.08
   0   7  -6    0.02    0.09
   0  -7   6   -0.10    0.09
   0   7  -7    0.17    0.12
   0   7  -7    0.11    0.11
  -1  -7  -7    0.69    0.19
   1   7   6    0.98    0.17
   1   7   6    1.17    0.18
  -1  -7  -6    0.68    0.19
   1   7   5    4.23    0.26
   1   7   5    4.35    0.27
  -1  -7  -5    4.61    0.32
   1   7   4    1.02    0.15
   1   7   4    0.70    0.13
  -1  -7  -4    0.85    0.15
   1   7   3    0.01    0.06
   1   7   3    0.09    0.07
  -1  -7  -3    0.20    0.08
  -1  -7  -3   -0.02    0.03
   1   7   2   26.70    0.68
   1   7   2   27.29    0.67
  -1  -7  -2   27.65    0.61
  -1  -7  -2   27.13    0.72
   1   7   1    1.90    0.12
   1   7   1    2.15    0.14
  -1  -7  -1    2.03    0.13
  -1  -7  -1    2.01    0.11
   1   7   0  168.92    3.32
   1   7   0  167.91    3.52
   1   7   0  166.49    3.42
  -1  -7   0  167.15    3.47
  -1  -7   0  172.64    3.44
   1   7  -1   10.53    0.31
   1   7  -1   10.64    0.30
   1   7  -1   10.71    0.31
  -1  -7   1   10.82    0.32
  -1  -7   1   10.40    0.32
   1   7  -2    9.88    0.32
   1   7  -2   10.26    0.31
   1   7  -2   10.37    0.31
  -1  -7   2   10.62    0.32
  -1  -7   2   10.26    0.32
   1   7  -3   17.98    0.50
   1   7  -3   18.13    0.51
   1   7  -3   17.58    0.48
   1   7  -4   19.53    0.58
  -1  -7   4   18.91    0.53
  -1  -7   4   18.90    0.54
   1   7  -5    1.79    0.19
   1   7  -5    1.69    0.19
   1   7  -5    2.17    0.21
  -1  -7   5    1.70    0.17
  -1  -7   5    1.70    0.17
   1   7  -6    2.64    0.22
   1   7  -6    2.28    0.23
   1   7  -6    2.84    0.25
   1   7  -7   -0.08    0.10
   1   7  -8    0.36    0.16
   2   7   6    0.34    0.14
   2   7   6    0.62    0.16
  -2  -7  -6    0.23    0.14
   2   7   5    0.10    0.10
   2   7   5    0.09    0.10
  -2  -7  -5   -0.04    0.08
   2   7   4    2.65    0.24
   2   7   4    2.69    0.22
  -2  -7  -4    2.95    0.24
   2   7   3   14.22    0.49
   2   7   3   14.53    0.48
  -2  -7  -3   14.77    0.52
   2   7   2    0.98    0.13
   2   7   2    1.27    0.14
  -2  -7  -2    0.92    0.08
  -2  -7  -2    1.19    0.14
   2   7   1    4.24    0.20
   2   7   1    3.60    0.19
   2   7   1    4.07    0.21
  -2  -7  -1    3.78    0.16
  -2  -7  -1    4.29    0.16
   2   7   0   28.35    0.71
   2   7   0   27.58    0.69
   2   7   0   28.50    0.67
  -2  -7   0   28.10    0.67
  -2  -7   0   27.84    0.67
   2   7  -1   31.69    0.72
   2   7  -1   30.07    0.74
   2   7  -1   31.39    0.76
  -2  -7   1   31.60    0.76
  -2  -7   1   31.89    0.75
   2   7  -3   14.78    0.42
   2   7  -3   13.86    0.44
   2   7  -3   14.74    0.40
  -2  -7   3   13.86    0.43
  -2  -7   3   14.45    0.44
   2   7  -4    0.26    0.08
   2   7  -4    0.29    0.09
   2   7  -4    0.33    0.09
  -2  -7   4    0.29    0.09
  -2  -7   4    0.28    0.08
   2   7  -5    1.34    0.16
   2   7  -5    1.35    0.18
   2   7  -5    1.32    0.16
  -2  -7   5    1.50    0.16
  -2  -7   5    1.46    0.17
   2   7  -6    2.31    0.25
   2   7  -7    1.25    0.21
   2   7  -8    0.32    0.15
   3   7   6    0.15    0.12
   3   7   6   -0.15    0.10
  -3  -7  -6    0.05    0.12
   3   7   5    0.11    0.12
   3   7   5    0.05    0.09
  -3  -7  -5    0.17    0.12
   3   7   4    0.61    0.15
   3   7   4    0.64    0.15
  -3  -7  -4    0.66    0.15
   3   7   3    0.64    0.14
   3   7   3    0.42    0.12
  -3  -7  -3    1.00    0.16
   3   7   2    0.62    0.12
   3   7   2    0.59    0.12
  -3  -7  -2    0.71    0.13
   3   7   1   12.44    0.42
   3   7   1   12.67    0.44
   3   7   1   12.54    0.43
  -3  -7  -1   13.36    0.36
  -3  -7  -1   12.58    0.36
   3   7   0   14.00    0.46
   3   7   0   14.07    0.44
   3   7   0   14.44    0.43
  -3  -7   0   14.51    0.41
  -3  -7   0   14.43    0.41
   3   7  -1    7.82    0.31
   3   7  -1    8.79    0.29
   3   7  -1    8.55    0.29
  -3  -7   1    8.39    0.30
   3   7  -2    3.93    0.21
   3   7  -2    4.37    0.19
   3   7  -2    4.56    0.20
   3   7  -2    4.21    0.21
  -3  -7   2    4.06    0.21
   3   7  -3    1.65    0.12
   3   7  -3    1.47    0.13
   3   7  -3    1.43    0.15
   3   7  -3    1.87    0.15
  -3  -7   3    1.48    0.15
   3   7  -4    1.66    0.14
   3   7  -4    1.91    0.15
   3   7  -4    1.28    0.16
  -3  -7   4    1.61    0.17
   3   7  -5    4.75    0.24
   3   7  -5    4.79    0.24
   3   7  -5    4.22    0.27
  -3  -7   5    4.50    0.27
  -3  -7   5    4.67    0.27
   3   7  -6    0.31    0.12
  -3  -7   6    0.22    0.10
  -3  -7   6    0.17    0.10
   3   7  -7   -0.05    0.10
   3   7  -8   -0.15    0.09
   4   7   6   -0.03    0.12
   4   7   5    0.16    0.12
   4   7   5   -0.12    0.10
  -4  -7  -5    0.19    0.13
   4   7   4    0.50    0.15
   4   7   4    0.69    0.17
  -4  -7  -4    0.24    0.12
   4   7   3    0.10    0.09
   4   7   3    0.13    0.09
  -4  -7  -3   -0.06    0.08
   4   7   2    3.75    0.26
   4   7   2    3.60    0.25
  -4  -7  -2    3.80    0.26
   4   7   1    0.56    0.12
   4   7   1    0.88    0.14
   4   7   1    0.76    0.14
  -4  -7  -1    0.60    0.09
  -4  -7  -1    1.05    0.11
   4   7   0    0.39    0.10
   4   7   0    0.65    0.12
   4   7   0    0.63    0.11
  -4  -7   0    0.53    0.09
   4   7  -1    3.88    0.20
   4   7  -1    3.36    0.20
   4   7  -1    3.72    0.20
   4   7  -1    3.62    0.22
  -4  -7   1    3.59    0.20
   4   7  -2   30.82    0.82
   4   7  -2   30.79    0.84
   4   7  -2   31.95    0.76
   4   7  -2   31.30    0.78
  -4  -7   2   30.39    0.81
   4   7  -3   -0.03    0.07
   4   7  -3    0.00    0.06
   4   7  -3    0.04    0.06
   4   7  -3    0.00    0.07
  -4  -7   3    0.04    0.07
   4   7  -4    0.06    0.08
   4   7  -4    0.05    0.06
   4   7  -4   -0.05    0.06
   4   7  -4   -0.11    0.07
  -4  -7   4   -0.02    0.07
   4   7  -5    0.04    0.09
   4   7  -5    0.19    0.11
  -4  -7   5    0.23    0.10
   4   7  -6   -0.01    0.08
  -4  -7   6   -0.02    0.08
  -4  -7   6    0.02    0.09
   4   7  -7    0.03    0.10
  -4  -7   7    0.10    0.08
  -4  -7   7    0.04    0.07
   4   7  -8   -0.02    0.11
   5   7   5   -0.02    0.13
   5   7   4    1.05    0.22
   5   7   4    0.77    0.18
  -5  -7  -4    0.88    0.19
   5   7   3    0.05    0.10
   5   7   3    0.04    0.10
  -5  -7  -3    0.14    0.10
   5   7   2    3.75    0.28
   5   7   2    3.98    0.28
  -5  -7  -2    4.21    0.29
   5   7   1   -0.07    0.08
   5   7   1    0.04    0.09
   5   7   1    0.02    0.09
   5   7   0   10.20    0.40
   5   7   0    9.52    0.42
   5   7   0   10.43    0.42
  -5  -7   0    9.90    0.36
   5   7  -1    4.07    0.24
   5   7  -1    4.76    0.28
   5   7  -1    3.97    0.23
   5   7  -1    4.39    0.25
  -5  -7   1    4.21    0.24
   5   7  -2    4.43    0.24
   5   7  -2    4.72    0.23
   5   7  -2    5.09    0.29
   5   7  -2    4.19    0.25
  -5  -7   2    4.87    0.26
   5   7  -3    3.91    0.20
   5   7  -3    3.36    0.23
   5   7  -3    3.95    0.21
   5   7  -3    3.66    0.25
  -5  -7   3    3.59    0.24
   5   7  -4    5.28    0.31
  -5  -7   4    4.61    0.29
   5   7  -5    0.19    0.10
   5   7  -5   -0.03    0.10
  -5  -7   5   -0.08    0.08
   5   7  -6    0.54    0.14
   5   7  -6    0.83    0.17
  -5  -7   6    0.73    0.16
   5   7  -7    0.11    0.12
  -5  -7   7    0.07    0.10
  -5  -7   7    0.07    0.11
   5   7  -8    0.02    0.12
   6   7   4   -0.13    0.11
   6   7   3    0.07    0.13
   6   7   3    0.13    0.14
  -6  -7  -3    0.12    0.12
   6   7   2   -0.06    0.09
   6   7   2    0.12    0.10
  -6  -7  -2    0.01    0.09
   6   7   1    0.03    0.10
   6   7   1    0.00    0.09
   6   7   1    0.07    0.09
   6   7   0    6.65    0.36
   6   7   0    6.38    0.34
   6   7   0    6.76    0.35
   6   7  -1    1.31    0.19
   6   7  -1    1.87    0.21
   6   7  -1    1.88    0.21
  -6  -7   1    1.77    0.19
   6   7  -2    1.38    0.17
   6   7  -2    1.14    0.18
   6   7  -2    1.36    0.19
   6   7  -2    1.45    0.17
  -6  -7   2    1.74    0.20
   6   7  -3    0.05    0.09
   6   7  -3    0.04    0.10
   6   7  -3   -0.03    0.07
   6   7  -3    0.01    0.07
  -6  -7   3    0.01    0.09
   6   7  -4    0.51    0.14
   6   7  -4    0.51    0.15
  -6  -7   4    0.21    0.11
   6   7  -5    0.23    0.11
   6   7  -5    0.09    0.11
  -6  -7   5    0.28    0.12
   6   7  -6    0.76    0.17
   6   7  -6    0.67    0.16
  -6  -7   6    0.77    0.16
   6   7  -7    0.12    0.12
   6   7  -7   -0.07    0.10
  -6  -7   7   -0.02    0.11
  -6  -7   8    0.27    0.14
  -6  -7   8    0.16    0.14
   7   7   3    0.12    0.13
   7   7   2    0.15    0.13
   7   7   2   -0.04    0.12
  -7  -7  -2    0.12    0.11
   7   7   1    0.00    0.10
   7   7   1   -0.04    0.11
   7   7   1    0.03    0.11
   7   7   0    1.25    0.20
   7   7   0    1.35    0.20
   7   7   0    1.32    0.21
   7   7  -1    0.13    0.09
   7   7  -1    0.20    0.10
   7   7  -1    0.35    0.13
   7   7  -1    0.15    0.10
  -7  -7   1    0.11    0.10
   7   7  -2    2.22    0.23
   7   7  -2    2.82    0.29
   7   7  -2    2.33    0.23
   7   7  -2    2.40    0.23
  -7  -7   2    2.65    0.26
   7   7  -3    2.09    0.25
   7   7  -3    2.13    0.25
  -7  -7   3    1.83    0.23
   7   7  -4    0.15    0.12
   7   7  -4    0.13    0.11
  -7  -7   4    0.22    0.11
   7   7  -5    0.23    0.12
   7   7  -5    0.34    0.14
  -7  -7   5    0.15    0.11
   7   7  -6    0.01    0.11
   7   7  -6    0.17    0.12
  -7  -7   6   -0.05    0.09
   7   7  -7    0.14    0.12
   7   7  -7   -0.07    0.12
  -7  -7   7   -0.06    0.12
   8   7   2    0.35    0.18
   8   7   1    0.00    0.13
   8   7   1    0.10    0.12
   8   7   0    0.31    0.14
   8   7   0    0.16    0.13
   8   7   0    0.04    0.11
   8   7  -1   -0.04    0.10
   8   7  -1   -0.04    0.09
   8   7  -1    0.08    0.10
   8   7  -2   -0.04    0.09
   8   7  -2   -0.01    0.09
  -8  -7   2    0.01    0.09
   8   7  -3    0.32    0.14
   8   7  -3    0.04    0.11
  -8  -7   3    0.09    0.12
   8   7  -4    0.68    0.17
   8   7  -4    0.50    0.16
  -8  -7   4    0.31    0.15
   8   7  -5    0.66    0.18
   8   7  -5    1.01    0.21
  -8  -7   5    0.88    0.19
   8   7  -6    0.09    0.13
   8   7  -6    0.28    0.16
  -8  -7   6    0.05    0.12
   8   7  -7    0.00    0.12
   9   7   0    0.04    0.14
   9   7  -1    0.07    0.12
   9   7  -2   -0.02    0.11
   9   7  -3   -0.13    0.10
   9   7  -3   -0.01    0.10
  -9  -7   3    0.11    0.12
   9   7  -4   -0.14    0.11
   9   7  -4   -0.03    0.12
  -9  -7   4   -0.01    0.12
   9   7  -5    0.30    0.16
   9   7  -6    0.00    0.12
   9  -8  -6    0.15    0.15
   9  -8  -5    0.14    0.15
   9  -8  -4    0.13    0.13
   9  -8  -4   -0.11    0.10
   9  -8  -3    0.01    0.13
   9  -8  -3    0.05    0.10
   9  -8  -2    0.14    0.12
   9  -8  -2    0.02    0.13
   8  -8  -7    0.05    0.12
   8  -8  -7    0.04    0.13
   8  -8  -6    0.58    0.18
   8  -8  -6    0.56    0.16
   8  -8  -6    0.61    0.18
   8  -8  -5    0.10    0.13
   8  -8  -5    0.02    0.10
   8  -8  -5    0.01    0.10
   8  -8  -4    0.50    0.16
   8  -8  -4    0.23    0.14
   8  -8  -3    0.40    0.15
   8  -8  -3    0.35    0.15
   8  -8  -2    0.06    0.10
   8  -8  -2    0.26    0.13
   8  -8  -1    0.02    0.06
   8  -8   0    0.02    0.12
   8  -8   0    0.18    0.13
   8  -8   1    0.34    0.16
   8  -8   1    0.27    0.17
   7  -8  -8   -0.04    0.12
   7  -8  -7    0.29    0.14
   7  -8  -7    0.13    0.12
   7  -8  -7    0.17    0.13
   7  -8  -6    0.20    0.13
   7  -8  -6    0.22    0.12
   7  -8  -6    0.75    0.19
   7  -8  -5    0.86    0.19
   7  -8  -5    0.82    0.18
   7  -8  -5    0.77    0.16
   7  -8  -4    5.91    0.35
   7  -8  -4    3.55    0.26
   7  -8  -4    5.35    0.34
   7  -8  -3    0.17    0.12
   7  -8  -3    0.03    0.09
   7  -8  -3    0.09    0.09
   7  -8  -2    0.16    0.11
   7  -8  -2    0.03    0.11
   7  -8  -1    0.57    0.14
   7  -8  -1    0.90    0.17
   7  -8  -1    0.68    0.15
   7  -8   0    3.26    0.28
   7  -8   0    3.55    0.27
   7  -8   1    0.00    0.11
   7  -8   1    0.00    0.10
   7  -8   2   -0.01    0.12
   7  -8   2    0.04    0.13
   7  -8   3   -0.04    0.14
   6  -8  -7    0.08    0.11
   6  -8  -7   -0.04    0.10
   6  -8  -7   -0.01    0.10
   6  -8  -6   -0.06    0.09
   6  -8  -6   -0.04    0.10
   6  -8  -6    0.07    0.10
   6  -8  -5    0.03    0.09
   6  -8  -5    0.20    0.11
   6  -8  -5    0.16    0.11
   6  -8  -4    0.07    0.06
   6  -8  -4    0.04    0.10
   6  -8  -4    0.26    0.11
   6  -8  -3   11.29    0.47
   6  -8  -3   11.15    0.48
   6  -8  -3   11.31    0.44
   6  -8  -2   11.52    0.47
   6  -8  -2   11.89    0.43
   6  -8  -2   10.88    0.46
   6  -8  -1    2.37    0.19
   6  -8  -1    2.58    0.22
   6  -8  -1    2.43    0.21
   6  -8  -1    1.90    0.21
   6  -8   0    1.91    0.21
   6  -8   0    1.92    0.20
   6  -8   0    1.75    0.21
   6  -8   0    1.92    0.20
   6  -8   1    2.78    0.28
   6  -8   1    2.66    0.27
   6  -8   2    2.51    0.29
   6  -8   2    1.84    0.25
   6  -8   3    0.29    0.15
   6  -8   3    0.52    0.17
   6  -8   4    0.46    0.19
   5  -8  -8    0.02    0.14
   5  -8  -7    0.56    0.15
   5  -8  -7    0.56    0.15
   5  -8  -7    0.89    0.19
   5  -8  -6    0.06    0.11
   5  -8  -6    0.03    0.10
   5  -8  -6    0.04    0.09
   5  -8  -5    1.55    0.20
   5  -8  -5    1.65    0.20
   5  -8  -5    1.17    0.18
   5  -8  -4    0.26    0.11
   5  -8  -4    0.22    0.10
   5  -8  -4    0.23    0.10
   5  -8  -3    0.23    0.09
   5  -8  -3    0.47    0.12
   5  -8  -3    0.41    0.12
  -5   8   2    0.39    0.08
   5  -8  -2    0.27    0.11
   5  -8  -2    0.32    0.09
   5  -8  -2    0.27    0.08
   5  -8  -2    0.46    0.12
   5  -8  -1   26.45    0.70
   5  -8  -1   25.58    0.74
   5  -8  -1   24.37    0.68
   5  -8  -1   25.40    0.67
   5  -8  -1   25.41    0.73
   5  -8   0    1.84    0.20
   5  -8   0    1.67    0.18
   5  -8   0    2.12    0.20
   5  -8   0    2.03    0.20
   5  -8   1    6.69    0.30
   5  -8   1    6.47    0.30
   5  -8   1    6.02    0.34
   5  -8   1    6.20    0.33
   5  -8   2    0.83    0.17
   5  -8   2    0.76    0.16
   5  -8   3    0.17    0.13
   5  -8   3    0.16    0.12
   5  -8   4   -0.10    0.11
   5  -8   4   -0.02    0.12
   5  -8   5    0.05    0.15
   4  -8  -8    0.25    0.15
   4  -8  -7   -0.01    0.12
   4  -8  -6    0.01    0.09
   4  -8  -6    0.06    0.10
   4  -8  -6    0.00    0.08
   4  -8  -5    6.55    0.33
   4  -8  -5    5.99    0.34
   4  -8  -5    6.38    0.32
   4  -8  -4    0.13    0.09
   4  -8  -4    0.27    0.10
   4  -8  -4    0.04    0.09
   4  -8  -3   12.44    0.45
   4  -8  -3   12.74    0.45
   4  -8  -3   12.66    0.43
  -4   8   2   -0.01    0.04
  -4   8   2   -0.12    0.04
   4  -8  -2   -0.03    0.07
   4  -8  -2    0.02    0.05
   4  -8  -2   -0.04    0.06
   4  -8  -1   10.84    0.34
   4  -8  -1   10.83    0.39
   4  -8  -1   10.79    0.34
   4  -8  -1   10.64    0.39
   4  -8   0    3.60    0.21
   4  -8   0    3.21    0.20
   4  -8   0    3.03    0.16
   4  -8   0    3.42    0.21
   4  -8   0    2.59    0.19
  -4   8  -1   16.42    0.47
   4  -8   1   16.84    0.51
   4  -8   1   17.34    0.51
   4  -8   1   16.59    0.54
   4  -8   1   16.51    0.55
   4  -8   2    0.95    0.16
   4  -8   2    1.06    0.18
   4  -8   3    7.44    0.40
   4  -8   3    7.24    0.38
   4  -8   4   -0.13    0.09
   4  -8   4    0.15    0.12
   4  -8   5    0.08    0.14
   4  -8   5    0.10    0.14
   4  -8   6    0.09    0.15
   3  -8  -8    0.13    0.14
   3  -8  -7    2.09    0.27
   3  -8  -6    0.14    0.09
   3  -8  -6    0.25    0.10
   3  -8  -6    0.17    0.11
   3  -8  -5    0.13    0.11
   3  -8  -5   -0.06    0.08
   3  -8  -5    0.23    0.09
   3  -8  -4    2.93    0.21
   3  -8  -4    3.05    0.21
   3  -8  -4    3.03    0.20
  -3   8   3    6.24    0.17
   3  -8  -3    6.11    0.28
   3  -8  -3    5.76    0.27
  -3   8   2    0.23    0.05
   3  -8  -2    0.02    0.06
   3  -8  -2    0.29    0.07
   3  -8  -2    0.13    0.07
  -3   8   1    7.52    0.25
   3  -8  -1    7.31    0.24
   3  -8  -1    7.17    0.29
   3  -8  -1    7.16    0.29
   3  -8   0    8.41    0.31
   3  -8   0    8.43    0.25
   3  -8   0    8.52    0.31
   3  -8   0    8.19    0.29
  -3   8  -1    2.20    0.12
   3  -8   1    2.50    0.16
   3  -8   1    2.22    0.18
   3  -8   1    1.79    0.15
   3  -8   1    2.29    0.17
  -3   8  -2    0.43    0.08
   3  -8   2    0.28    0.08
   3  -8   2    0.20    0.10
   3  -8   2    0.42    0.12
   3  -8   2    0.32    0.08
   3  -8   3   17.89    0.63
   3  -8   3   18.76    0.62
   3  -8   4    1.15    0.19
   3  -8   4    1.61    0.22
   3  -8   5    5.41    0.36
   3  -8   5    4.39    0.34
  -3   8  -6    0.33    0.15
   3  -8   6    0.55    0.18
   2  -8  -8   -0.15    0.12
   2  -8  -7    3.22    0.33
   2  -8  -6    0.38    0.13
   2  -8  -5    4.93    0.25
   2  -8  -5    5.31    0.31
   2  -8  -5    5.26    0.25
  -2   8   4    0.51    0.07
   2  -8  -4    0.60    0.12
   2  -8  -4    0.50    0.10
   2  -8  -4    0.54    0.10
  -2   8   3    3.85    0.14
   2  -8  -3    3.74    0.20
   2  -8  -3    3.61    0.20
   2  -8  -3    3.89    0.21
  -2   8   2   11.61    0.31
   2  -8  -2   11.96    0.38
   2  -8  -2   11.87    0.35
   2  -8  -2   11.97    0.38
  -2   8   1    5.22    0.19
  -2   8   1    4.66    0.18
   2  -8  -1    5.09    0.17
   2  -8  -1    4.92    0.21
   2  -8  -1    5.03    0.22
  -2   8   0    2.29    0.13
   2  -8   0    1.95    0.07
   2  -8   0    2.08    0.14
   2  -8   0    1.89    0.13
  -2   8  -1    5.47    0.17
  -2   8  -1    5.54    0.24
   2  -8   1    5.28    0.22
   2  -8   1    5.73    0.24
   2  -8   1    5.78    0.23
  -2   8  -2   13.88    0.39
   2  -8   2   13.95    0.45
   2  -8   2   14.32    0.41
   2  -8   2   13.72    0.40
  -2   8  -3    2.97    0.18
   2  -8   3    3.30    0.24
   2  -8   3    3.28    0.17
   2  -8   3    3.32    0.23
  -2   8  -4    7.16    0.32
   2  -8   4    6.60    0.35
   2  -8   5   11.22    0.49
  -2   8  -6    0.02    0.12
   2  -8   6   -0.06    0.12
   2  -8   7    1.43    0.25
   1  -8  -7    0.10    0.12
   1  -8  -6   -0.01    0.09
   1  -8  -5    8.53    0.41
  -1   8   4   -0.02    0.05
  -1   8   4   -0.08    0.05
   1  -8  -4    0.12    0.06
   1  -8  -4   -0.11    0.05
   1  -8  -4   -0.03    0.08
  -1   8   3   32.20    0.75
  -1   8   3   32.85    0.73
   1  -8  -3   33.19    0.78
   1  -8  -3   32.80    0.79
   1  -8  -3   32.67    0.85
  -1   8   2    5.06    0.18
  -1   8   2    5.01    0.17
   1  -8  -2    4.37    0.19
   1  -8  -2    5.11    0.20
  -1   8   1   10.90    0.30
  -1   8   1   10.86    0.30
   1  -8  -1   11.15    0.30
   1  -8  -1   10.59    0.33
   1  -8  -1   11.02    0.33
  -1   8   0   23.16    0.56
  -1   8   0   24.81    0.58
   1  -8   0   23.81    0.59
   1  -8   0   23.14    0.59
  -1   8  -1   16.02    0.43
  -1   8  -1   15.70    0.35
  -1   8  -1   15.31    0.44
   1  -8   1   15.66    0.43
   1  -8   1   15.52    0.43
  -1   8  -2    9.37    0.34
  -1   8  -2    9.96    0.29
   1  -8   2   10.00    0.32
   1  -8   2    9.93    0.31
   1  -8   2   10.37    0.34
  -1   8  -3    7.13    0.27
  -1   8  -3    7.48    0.32
   1  -8   3    7.78    0.27
   1  -8   3    7.52    0.32
   1  -8   3    7.13    0.26
  -1   8  -4    9.42    0.36
  -1   8  -4    8.96    0.40
   1  -8   4    9.01    0.38
  -1   8  -5    4.38    0.29
  -1   8  -5    4.93    0.28
   1  -8   5    4.24    0.28
  -1   8  -6    2.29    0.27
   1  -8   6    2.41    0.26
  -1   8  -7    0.35    0.15
   1  -8   7    0.31    0.15
   0  -8  -7    0.67    0.18
   0  -8  -6    4.64    0.34
   0   8   5    3.17    0.21
   0   8   5    2.76    0.20
   0  -8  -5    3.31    0.26
   0   8   4    0.43    0.10
   0   8   4    0.49    0.10
   0  -8  -4    0.68    0.14
   0   8   3   -0.07    0.05
   0   8   3    0.14    0.06
   0  -8  -3    0.03    0.05
   0  -8  -3    0.18    0.06
   0  -8  -3    0.07    0.06
   0   8   2    9.32    0.29
   0   8   2    9.14    0.28
   0  -8  -2    9.31    0.28
   0  -8  -2    9.54    0.28
   0  -8  -2    9.03    0.32
   0   8   1   19.75    0.48
   0   8   1   19.64    0.50
   0  -8  -1   20.40    0.50
   0  -8  -1   19.93    0.50
   0   8   0   32.65    0.73
   0   8   0   33.22    0.73
   0   8   0   32.74    0.76
   0  -8   0   33.42    0.77
   0  -8   0   32.72    0.76
   0   8  -1   19.92    0.52
   0   8  -1   19.80    0.49
   0   8  -1   20.06    0.46
   0  -8   1   19.88    0.51
   0  -8   1   20.01    0.51
   0   8  -2    9.02    0.31
   0   8  -2    9.66    0.28
   0   8  -2    9.69    0.31
   0   8  -3    0.08    0.06
   0   8  -3    0.07    0.07
   0   8  -3    0.10    0.07
   0  -8   3    0.05    0.06
   0  -8   3    0.01    0.05
   0   8  -4    0.59    0.12
   0   8  -4    0.63    0.11
   0  -8   4    0.44    0.10
   0  -8   4    0.54    0.10
   0   8  -5    3.09    0.23
   0   8  -5    2.91    0.23
   0  -8   5    3.05    0.23
   0   8  -6    3.91    0.28
   0   8  -6    4.94    0.31
   0   8  -7    0.66    0.17
   0   8  -7    0.90    0.19
  -1  -8  -7    0.36    0.17
   1   8   6    2.48    0.25
   1   8   6    2.36    0.25
  -1  -8  -6    2.82    0.31
   1   8   5    4.51    0.27
   1   8   5    4.73    0.28
  -1  -8  -5    4.82    0.32
   1   8   4    8.61    0.35
   1   8   4    8.18    0.35
  -1  -8  -4    8.58    0.40
   1   8   3    7.44    0.30
   1   8   3    7.27    0.30
  -1  -8  -3    7.08    0.33
  -1  -8  -3    7.48    0.22
   1   8   2    9.86    0.33
   1   8   2    9.88    0.33
  -1  -8  -2   10.01    0.36
  -1  -8  -2    9.73    0.28
  -1  -8  -2   10.02    0.28
   1   8   1   15.22    0.42
   1   8   1   15.83    0.43
  -1  -8  -1   15.71    0.40
  -1  -8  -1   15.10    0.40
  -1  -8  -1   15.42    0.44
   1   8   0   22.56    0.56
   1   8   0   22.95    0.55
  -1  -8   0   22.69    0.57
  -1  -8   0   23.49    0.57
   1   8  -1   10.85    0.33
   1   8  -1   10.35    0.31
   1   8  -1   10.75    0.30
  -1  -8   1   10.58    0.32
   1   8  -2    4.92    0.19
   1   8  -2    4.56    0.20
   1   8  -2    4.88    0.20
  -1  -8   2    4.84    0.21
  -1  -8   2    5.10    0.21
   1   8  -3   33.48    0.79
   1   8  -3   31.53    0.81
   1   8  -3   34.00    0.82
   1   8  -4    0.06    0.07
   1   8  -4    0.03    0.07
   1   8  -4    0.08    0.08
  -1  -8   4    0.03    0.06
  -1  -8   4    0.10    0.07
   1   8  -5    8.71    0.38
  -1  -8   5    7.97    0.33
  -1  -8   5    8.91    0.34
   1   8  -6    0.03    0.09
   1   8  -6   -0.06    0.09
   1   8  -6    0.00    0.08
   1   8  -7   -0.02    0.10
   2   8   6    0.08    0.11
   2   8   6    0.05    0.10
  -2  -8  -6    0.09    0.12
   2   8   5   10.29    0.46
   2   8   5   10.36    0.45
  -2  -8  -5   10.79    0.50
   2   8   4    6.64    0.33
   2   8   4    7.03    0.35
  -2  -8  -4    6.93    0.37
   2   8   3    2.92    0.21
   2   8   3    3.17    0.22
  -2  -8  -3    2.92    0.22
   2   8   2   13.39    0.43
   2   8   2   13.34    0.44
  -2  -8  -2   12.36    0.45
  -2  -8  -2   13.13    0.34
   2   8   1    5.14    0.23
   2   8   1    4.95    0.24
   2   8   1    4.94    0.22
  -2  -8  -1    5.16    0.19
  -2  -8  -1    5.03    0.19
   2   8   0    1.92    0.13
   2   8   0    2.07    0.14
   2   8   0    2.10    0.14
  -2  -8   0    1.81    0.12
  -2  -8   0    2.05    0.13
   2   8  -1    5.47    0.22
   2   8  -1    4.81    0.21
   2   8  -1    4.96    0.20
  -2  -8   1    4.89    0.21
  -2  -8   1    4.71    0.21
   2   8  -2   11.17    0.35
   2   8  -2   11.39    0.36
   2   8  -2   11.53    0.34
  -2  -8   2   11.11    0.37
  -2  -8   2   11.72    0.37
   2   8  -3    3.61    0.19
   2   8  -3    3.89    0.20
   2   8  -3    3.60    0.18
  -2  -8   3    3.96    0.21
  -2  -8   3    3.66    0.20
   2   8  -4    0.42    0.10
   2   8  -4    0.63    0.11
   2   8  -4    0.68    0.11
  -2  -8   4    0.55    0.11
  -2  -8   4    0.56    0.11
   2   8  -5    5.18    0.30
   2   8  -5    5.41    0.27
   2   8  -5    5.28    0.27
  -2  -8   5    5.51    0.28
  -2  -8   5    5.70    0.29
   2   8  -6    0.66    0.13
   2   8  -6    0.39    0.12
   2   8  -7    2.79    0.30
   2   8  -8    0.00    0.13
   3   8   6    0.68    0.17
   3   8   6    0.33    0.15
  -3  -8  -6    0.41    0.16
  -3  -8  -5    4.84    0.35
   3   8   4    1.68    0.22
   3   8   4    1.55    0.21
  -3  -8  -4    1.69    0.22
   3   8   3   18.13    0.60
   3   8   3   17.44    0.60
  -3  -8  -3   17.68    0.63
   3   8   2    0.26    0.10
   3   8   2    0.19    0.09
  -3  -8  -2    0.42    0.11
   3   8   1    2.25    0.16
   3   8   1    1.91    0.17
   3   8   1    2.16    0.17
  -3  -8  -1    1.80    0.13
  -3  -8  -1    2.18    0.13
   3   8   0    8.11    0.32
   3   8   0    8.09    0.30
   3   8   0    7.77    0.30
  -3  -8   0    7.80    0.28
  -3  -8   0    8.09    0.28
   3   8  -1    7.06    0.27
   3   8  -1    6.63    0.28
   3   8  -1    7.18    0.27
  -3  -8   1    6.32    0.26
  -3  -8   1    6.85    0.27
   3   8  -2    0.07    0.06
   3   8  -2    0.01    0.02
  -3  -8   2    0.15    0.07
  -3  -8   2    0.15    0.07
   3   8  -3    5.75    0.23
   3   8  -3    5.76    0.24
   3   8  -3    5.54    0.26
  -3  -8   3    5.33    0.27
  -3  -8   3    6.09    0.27
   3   8  -4    2.92    0.19
   3   8  -4    2.98    0.21
   3   8  -4    3.16    0.19
  -3  -8   4    3.08    0.21
  -3  -8   4    3.25    0.22
   3   8  -5    0.17    0.09
   3   8  -5    0.21    0.10
   3   8  -5    0.21    0.09
  -3  -8   5    0.07    0.09
  -3  -8   5    0.10    0.10
   3   8  -6    0.24    0.12
  -3  -8   6    0.23    0.10
  -3  -8   6    0.32    0.12
   3   8  -7    2.05    0.25
   3   8  -8    0.19    0.13
   4   8   6    0.04    0.13
   4   8   5    0.10    0.12
   4   8   5    0.08    0.12
  -4  -8  -5    0.23    0.13
   4   8   4    0.07    0.11
   4   8   4    0.00    0.10
  -4  -8  -4    0.06    0.10
   4   8   3    6.93    0.38
   4   8   3    6.99    0.37
  -4  -8  -3    6.77    0.38
   4   8   2    0.75    0.15
   4   8   2    0.99    0.17
  -4  -8  -2    0.79    0.15
   4   8   1   15.66    0.53
   4   8   1   14.93    0.54
   4   8   1   15.96    0.54
  -4  -8  -1   15.91    0.45
  -4  -8  -1   15.78    0.45
   4   8   0    3.03    0.21
   4   8   0    3.28    0.21
   4   8   0    2.89    0.20
  -4  -8   0    2.85    0.17
  -4  -8   0    3.09    0.18
   4   8  -1   10.81    0.37
   4   8  -1   10.97    0.38
   4   8  -1   10.68    0.41
  -4  -8   1    9.21    0.35
   4   8  -2    0.05    0.07
   4   8  -2    0.06    0.05
   4   8  -2    0.04    0.05
   4   8  -2   -0.05    0.06
   4   8  -3   12.67    0.40
   4   8  -3   12.35    0.45
   4   8  -3   12.10    0.38
   4   8  -3   12.53    0.46
  -4  -8   3   12.52    0.45
   4   8  -4    0.19    0.08
   4   8  -4    0.15    0.08
   4   8  -4    0.38    0.11
   4   8  -4    0.55    0.13
  -4  -8   4    0.23    0.10
   4   8  -5    6.65    0.35
  -4  -8   5    5.99    0.33
   4   8  -6   -0.03    0.08
  -4  -8   6   -0.01    0.09
  -4  -8   6   -0.09    0.08
   4   8  -7   -0.05    0.10
  -4  -8   7    0.03    0.05
  -4  -8   7    0.03    0.05
   4   8  -8    0.10    0.13
   5   8   5   -0.06    0.12
   5   8   4    0.17    0.13
   5   8   4    0.08    0.12
  -5  -8  -4    0.15    0.12
   5   8   3    0.05    0.11
   5   8   3    0.11    0.11
  -5  -8  -3    0.14    0.11
   5   8   2    0.68    0.15
   5   8   2    0.56    0.14
  -5  -8  -2    0.74    0.15
   5   8   1    6.46    0.35
   5   8   1    6.29    0.33
   5   8   1    6.44    0.35
   5   8   0    2.17    0.22
   5   8   0    2.07    0.22
   5   8   0    1.96    0.22
  -5  -8   0    1.97    0.17
  -5  -8   0    2.01    0.18
   5   8  -1   24.36    0.69
   5   8  -1   23.30    0.73
   5   8  -1   22.66    0.66
   5   8  -1   23.12    0.67
  -5  -8   1   24.05    0.68
   5   8  -2    0.28    0.09
   5   8  -2    0.31    0.10
   5   8  -2    0.13    0.08
   5   8  -2    0.18    0.10
  -5  -8   2    0.28    0.10
   5   8  -3    0.45    0.13
   5   8  -3    0.38    0.11
   5   8  -3    0.51    0.10
   5   8  -3    0.51    0.10
  -5  -8   3    0.33    0.11
   5   8  -4    0.23    0.09
   5   8  -4    0.13    0.10
   5   8  -4    0.10    0.11
  -5  -8   4    0.15    0.10
   5   8  -5    1.45    0.20
   5   8  -5    1.51    0.21
  -5  -8   5    1.46    0.20
   5   8  -6    0.00    0.08
  -5  -8   6    0.11    0.11
   5   8  -7    0.80    0.19
  -5  -8   7    0.72    0.17
  -5  -8   7    0.74    0.17
   5   8  -8    0.14    0.14
   6   8   4    0.30    0.15
   6   8   3    0.56    0.18
   6   8   3    0.57    0.17
  -6  -8  -3    0.53    0.16
   6   8   2    1.39    0.23
   6   8   2    1.57    0.23
  -6  -8  -2    1.87    0.25
   6   8   1    3.25    0.26
   6   8   1    2.70    0.27
   6   8   1    3.37    0.28
   6   8   0    1.72    0.22
   6   8   0    1.65    0.21
   6   8   0    1.51    0.20
   6   8  -1    2.53    0.21
   6   8  -1    2.15    0.24
   6   8  -1    2.17    0.22
  -6  -8   1    2.38    0.20
   6   8  -2   10.09    0.41
   6   8  -2   10.88    0.47
   6   8  -2   11.23    0.44
   6   8  -2    9.37    0.39
  -6  -8   2   11.21    0.44
   6   8  -3   10.74    0.48
   6   8  -3   11.00    0.40
   6   8  -3   11.29    0.47
   6   8  -3   11.73    0.42
  -6  -8   3   11.21    0.46
   6   8  -4   -0.10    0.07
   6   8  -4    0.09    0.11
  -6  -8   4    0.27    0.12
   6   8  -5   -0.03    0.10
   6   8  -5    0.08    0.10
  -6  -8   5    0.05    0.10
   6   8  -6   -0.03    0.09
   6   8  -6    0.06    0.12
  -6  -8   6    0.16    0.12
   6   8  -7   -0.03    0.10
  -6  -8   7   -0.03    0.10
  -6  -8   8    0.08    0.14
  -6  -8   8    0.04    0.13
   7   8   3   -0.02    0.11
   7   8   2   -0.03    0.11
   7   8   2    0.04    0.12
  -7  -8  -2   -0.03    0.10
   7   8   1    0.16    0.12
   7   8   1    0.20    0.13
   7   8   1    0.13    0.11
   7   8   0    3.13    0.28
   7   8   0    3.19    0.30
   7   8   0    3.10    0.30
   7   8  -1    0.75    0.17
   7   8  -1    0.66    0.15
   7   8  -1    0.68    0.14
   7   8  -1    0.60    0.14
  -7  -8   1    0.69    0.14
   7   8  -2    0.05    0.09
   7   8  -2    0.20    0.11
   7   8  -2    0.18    0.10
   7   8  -2    0.20    0.11
  -7  -8   2    0.04    0.09
   7   8  -3    0.15    0.11
   7   8  -3    0.08    0.10
  -7  -8   3   -0.05    0.09
   7   8  -4    5.29    0.34
   7   8  -4    5.64    0.36
  -7  -8   4    5.96    0.36
   7   8  -5    0.67    0.17
   7   8  -5    0.63    0.17
  -7  -8   5    0.78    0.18
   7   8  -6    0.52    0.18
   7   8  -6    0.27    0.14
  -7  -8   6    0.53    0.16
   7   8  -7    0.09    0.14
   7   8  -7    0.00    0.12
  -7  -8   7    0.17    0.13
  -7  -8   8   -0.03    0.13
   8   8   1    0.36    0.17
   8   8   0   -0.01    0.11
   8   8   0   -0.11    0.11
   8   8   0   -0.08    0.10
   8   8  -1    0.26    0.12
   8   8  -1    0.11    0.12
   8   8  -1    0.12    0.12
   8   8  -2    0.18    0.12
   8   8  -2    0.15    0.13
   8   8  -2    0.17    0.11
  -8  -8   2    0.12    0.11
   8   8  -3    0.30    0.13
   8   8  -3    0.19    0.13
  -8  -8   3    0.47    0.15
   8   8  -4    0.37    0.15
   8   8  -4    0.30    0.14
  -8  -8   4    0.46    0.15
   8   8  -5    0.02    0.12
   8   8  -5    0.05    0.12
  -8  -8   5   -0.05    0.10
   8   8  -6    0.18    0.15
   8   8  -6    0.65    0.20
  -8  -8   6    0.62    0.19
   8   8  -7    0.00    0.14
   9   8   0    0.19    0.15
   9   8  -1    1.57    0.25
   9   8  -3   -0.01    0.12
   9   8  -3    0.03    0.11
  -9  -8   3    0.11    0.12
   9   8  -4    0.06    0.12
   9   8  -4   -0.01    0.11
  -9  -8   4   -0.07    0.11
   9   8  -5    0.12    0.14
   9   8  -6    0.48    0.19
   9  -9  -6    0.28    0.17
   9  -9  -5    2.95    0.35
   9  -9  -4    0.11    0.13
   9  -9  -4   -0.01    0.12
   9  -9  -3    0.21    0.15
   9  -9  -3    0.15    0.13
   9  -9  -2   -0.01    0.12
   9  -9  -2    0.01    0.11
   8  -9  -7   -0.02    0.12
   8  -9  -7    0.01    0.12
   8  -9  -6    0.25    0.15
   8  -9  -6   -0.01    0.11
   8  -9  -6   -0.05    0.12
   8  -9  -5    2.49    0.30
   8  -9  -5    2.07    0.29
   8  -9  -4    0.08    0.12
   8  -9  -4    0.10    0.11
   8  -9  -3    1.85    0.24
   8  -9  -3    1.71    0.25
   8  -9  -2    0.09    0.11
   8  -9  -2   -0.02    0.09
   8  -9  -1    0.00    0.09
   8  -9   0   -0.03    0.11
   8  -9   1   -0.09    0.14
   8  -9   1    0.37    0.17
   7  -9  -8    0.09    0.14
   7  -9  -7   -0.05    0.11
   7  -9  -7    0.00    0.11
   7  -9  -7   -0.12    0.09
   7  -9  -6    0.09    0.11
   7  -9  -6   -0.03    0.09
   7  -9  -6    0.05    0.12
   7  -9  -5   -0.09    0.10
   7  -9  -5   -0.01    0.09
   7  -9  -5   -0.07    0.10
   7  -9  -4    1.76    0.23
   7  -9  -4    1.85    0.25
   7  -9  -4    1.82    0.22
   7  -9  -3   12.67    0.54
   7  -9  -3   12.05    0.53
   7  -9  -2    0.59    0.16
   7  -9  -2    0.62    0.15
   7  -9  -1    3.45    0.27
   7  -9  -1    3.82    0.28
   7  -9   0    0.36    0.14
   7  -9   0    0.12    0.12
   7  -9   1    2.88    0.29
   7  -9   1    2.67    0.30
   7  -9   2    0.21    0.15
   7  -9   2    0.25    0.17
   7  -9   3    0.04    0.15
   6  -9  -7    0.92    0.20
   6  -9  -7    1.42    0.22
   6  -9  -7    1.38    0.23
   6  -9  -6    0.80    0.17
   6  -9  -6    0.92    0.19
   6  -9  -6    0.83    0.17
   6  -9  -5    0.40    0.14
   6  -9  -5    0.41    0.13
   6  -9  -5    0.36    0.12
   6  -9  -4    0.40    0.13
   6  -9  -4    0.15    0.09
   6  -9  -4    0.05    0.09
   6  -9  -3    0.20    0.11
   6  -9  -3    0.33    0.12
   6  -9  -3    0.25    0.10
   6  -9  -2    1.44    0.19
   6  -9  -2    1.47    0.20
   6  -9  -1   10.02    0.43
   6  -9  -1    9.58    0.38
   6  -9  -1   10.25    0.43
   6  -9  -1   10.63    0.41
   6  -9   0    0.18    0.09
   6  -9   0    0.20    0.11
   6  -9   0   -0.14    0.07
   6  -9   0   -0.07    0.07
   6  -9   1    1.84    0.24
   6  -9   1    1.67    0.22
   6  -9   2   -0.01    0.11
   6  -9   2    0.15    0.12
   6  -9   3    2.21    0.29
   6  -9   3    2.09    0.30
   6  -9   4    0.03    0.14
   5  -9  -8   -0.04    0.12
   5  -9  -7   -0.17    0.08
   5  -9  -7   -0.03    0.10
   5  -9  -7    0.01    0.10
   5  -9  -6    0.27    0.12
   5  -9  -6    0.09    0.10
   5  -9  -6    0.30    0.13
   5  -9  -5    3.21    0.26
   5  -9  -5    3.35    0.26
   5  -9  -5    3.15    0.25
   5  -9  -4    4.01    0.27
   5  -9  -4    2.57    0.21
   5  -9  -4    3.87    0.26
   5  -9  -3    2.65    0.19
   5  -9  -3    2.61    0.22
   5  -9  -3    2.35    0.24
  -5   9   2    0.01    0.06
   5  -9  -2    0.06    0.07
   5  -9  -2    0.03    0.08
   5  -9  -2    0.24    0.10
   5  -9  -1    2.60    0.18
   5  -9  -1    2.64    0.21
   5  -9  -1    2.53    0.24
   5  -9  -1    3.02    0.18
   5  -9   0    1.64    0.19
   5  -9   0    1.48    0.19
   5  -9   1    2.21    0.21
   5  -9   1    1.64    0.20
   5  -9   1    2.40    0.19
   5  -9   1    1.83    0.22
   5  -9   2    2.75    0.28
   5  -9   2    2.35    0.26
   5  -9   3    3.74    0.36
   5  -9   3    2.22    0.27
   5  -9   4    0.50    0.18
   5  -9   4    0.44    0.17
   5  -9   5    1.24    0.25
   4  -9  -8    0.13    0.13
   4  -9  -7    0.88    0.19
   4  -9  -6    0.00    0.08
   4  -9  -6    0.22    0.12
   4  -9  -6    0.19    0.11
   4  -9  -5    0.14    0.10
   4  -9  -5    0.36    0.12
   4  -9  -5    0.06    0.09
   4  -9  -4    1.13    0.16
   4  -9  -4    0.88    0.14
   4  -9  -4    0.78    0.15
   4  -9  -3   14.75    0.51
   4  -9  -3   14.80    0.50
   4  -9  -3   15.18    0.48
  -4   9   2   14.43    0.39
  -4   9   2   14.83    0.41
   4  -9  -2   15.24    0.50
   4  -9  -2   15.11    0.45
   4  -9  -2   15.60    0.51
  -4   9   1    2.11    0.15
   4  -9  -1    2.40    0.19
   4  -9  -1    2.66    0.16
   4  -9  -1    2.38    0.14
   4  -9  -1    2.67    0.20
   4  -9   0   18.16    0.55
   4  -9   0   17.83    0.55
   4  -9   0   17.83    0.54
   4  -9   0   17.79    0.48
   4  -9   0   18.45    0.53
   4  -9   1   11.85    0.45
   4  -9   1   12.06    0.42
   4  -9   1   12.22    0.46
   4  -9   1   11.86    0.41
   4  -9   2   16.74    0.60
   4  -9   2   15.84    0.57
   4  -9   3    5.46    0.34
   4  -9   3    5.13    0.34
   4  -9   4    0.48    0.16
   4  -9   4    0.31    0.15
   4  -9   5    2.98    0.33
   4  -9   6    0.12    0.16
   3  -9  -8    0.51    0.17
   3  -9  -7    0.30    0.14
   3  -9  -6    0.90    0.17
   3  -9  -5    8.27    0.39
   3  -9  -5    8.65    0.36
   3  -9  -5    9.01    0.37
   3  -9  -4    1.72    0.18
   3  -9  -4    1.54    0.17
   3  -9  -4    1.43    0.17
  -3   9   3    0.32    0.05
   3  -9  -3    0.22    0.07
   3  -9  -3    0.50    0.10
   3  -9  -3    0.23    0.08
  -3   9   2    5.24    0.18
  -3   9   2    5.12    0.19
   3  -9  -2    4.70    0.25
   3  -9  -2    5.56    0.25
   3  -9  -2    5.18    0.21
  -3   9   1   49.23    1.09
  -3   9   1   48.55    1.05
   3  -9  -1   48.35    1.08
   3  -9  -1   49.30    1.17
   3  -9  -1   47.52    1.15
  -3   9   0    7.99    0.30
   3  -9   0    7.44    0.30
   3  -9   0    8.17    0.31
   3  -9   0    7.85    0.23
   3  -9   0    7.75    0.29
  -3   9  -1    2.82    0.13
   3  -9   1    2.87    0.18
   3  -9   1    2.90    0.20
   3  -9   1    2.62    0.17
  -3   9  -2   19.66    0.53
   3  -9   2   20.58    0.56
   3  -9   2   20.64    0.62
   3  -9   2   19.61    0.56
   3  -9   2   20.29    0.64
   3  -9   3    1.38    0.20
   3  -9   3    1.71    0.21
   3  -9   4   17.53    0.64
   3  -9   4   18.02    0.66
   3  -9   5    2.28    0.28
  -3   9  -6   -0.10    0.11
   3  -9   6    0.09    0.15
   2  -9  -8    1.34    0.25
   2  -9  -7    0.17    0.14
   2  -9  -6    0.08    0.10
   2  -9  -5    2.50    0.17
   2  -9  -5    2.65    0.18
   2  -9  -5    2.55    0.23
  -2   9   4    4.32    0.17
   2  -9  -4    4.41    0.23
   2  -9  -4    4.45    0.23
   2  -9  -4    4.16    0.25
  -2   9   3   20.85    0.49
   2  -9  -3   19.93    0.57
   2  -9  -3   20.45    0.58
   2  -9  -3   20.45    0.59
  -2   9   2    1.02    0.09
   2  -9  -2    1.02    0.12
   2  -9  -2    1.13    0.13
   2  -9  -2    0.80    0.09
  -2   9   1    4.69    0.18
  -2   9   1    4.21    0.17
   2  -9  -1    4.51    0.16
   2  -9  -1    4.36    0.20
   2  -9  -1    4.57    0.21
  -2   9   0    0.16    0.06
  -2   9   0    0.13    0.06
   2  -9   0    0.28    0.07
   2  -9   0    0.40    0.08
  -2   9  -2    0.21    0.06
  -2   9  -2    0.22    0.08
   2  -9   2    0.20    0.07
   2  -9   2    0.22    0.09
   2  -9   2    0.22    0.07
  -2   9  -3    1.14    0.17
  -2   9  -3    0.91    0.12
   2  -9   3    1.21    0.17
   2  -9   3    1.39    0.14
   2  -9   3    0.89    0.11
  -2   9  -4    2.93    0.25
   2  -9   4    2.69    0.27
  -2   9  -5    0.13    0.11
   2  -9   5   -0.11    0.09
  -2   9  -6    3.45    0.30
   2  -9   6    3.53    0.34
   2  -9   7    0.08    0.14
   1  -9  -7    0.29    0.15
   1  -9  -6    1.81    0.24
   1  -9  -5    0.45    0.14
  -1   9   4    0.20    0.07
  -1   9   4    0.16    0.07
   1  -9  -4    0.25    0.07
   1  -9  -4    0.18    0.07
   1  -9  -4    0.24    0.10
  -1   9   3    4.58    0.19
  -1   9   3    4.32    0.18
   1  -9  -3    4.34    0.20
   1  -9  -3    4.60    0.23
   1  -9  -3    4.71    0.21
  -1   9   2    9.27    0.27
  -1   9   2    9.39    0.28
   1  -9  -2    9.39    0.31
   1  -9  -2    9.73    0.31
  -1   9   1    9.85    0.29
  -1   9   1    9.32    0.28
   1  -9  -1   10.01    0.28
   1  -9  -1    9.78    0.31
   1  -9  -1    9.68    0.32
  -1   9   0    0.74    0.09
  -1   9   0    0.84    0.09
   1  -9   0    0.78    0.09
   1  -9   0    0.85    0.10
  -1   9  -1   27.88    0.68
  -1   9  -1   28.33    0.70
   1  -9   1   28.16    0.69
   1  -9   1   27.50    0.69
  -1   9  -2    1.91    0.10
  -1   9  -2    1.52    0.15
   1  -9   2    1.60    0.13
   1  -9   2    1.77    0.13
  -1   9  -3    0.36    0.10
  -1   9  -3    0.40    0.08
   1  -9   3    0.32    0.08
   1  -9   3    0.28    0.10
   1  -9   3    0.24    0.08
  -1   9  -4    0.20    0.11
  -1   9  -4    0.34    0.09
   1  -9   4    0.41    0.13
  -1   9  -5    0.31    0.12
   1  -9   5    0.39    0.14
  -1   9  -6    1.05    0.19
   1  -9   6    1.29    0.21
  -1   9  -7    0.16    0.13
   0  -9  -7    1.42    0.24
   0  -9  -6    0.09    0.11
   0   9   5    0.01    0.08
   0   9   5    0.09    0.07
   0  -9  -5   -0.06    0.09
   0   9   4    3.89    0.21
   0   9   4    3.75    0.21
   0  -9  -4    3.98    0.26
   0   9   3    6.41    0.25
   0   9   3    6.52    0.26
   0  -9  -3    7.05    0.24
   0  -9  -3    6.42    0.29
   0  -9  -3    6.45    0.23
   0   9   2    0.08    0.05
   0   9   2    0.11    0.06
   0  -9  -2    0.00    0.04
   0  -9  -2    0.02    0.05
   0  -9  -2    0.15    0.05
   0   9   1    1.87    0.12
   0   9   1    1.88    0.12
   0  -9  -1    2.10    0.12
   0  -9  -1    1.92    0.11
   0  -9  -1    1.72    0.12
   0   9   0   -0.06    0.02
   0   9   0   -0.06    0.05
   0   9   0   -0.07    0.04
   0  -9   0    0.01    0.04
   0  -9   0    0.01    0.04
   0   9  -1    2.07    0.13
   0   9  -1    2.08    0.13
   0   9  -1    1.88    0.09
   0  -9   1    1.73    0.13
   0  -9   1    2.05    0.13
   0   9  -2    0.06    0.06
   0   9  -2    0.12    0.04
   0   9  -2    0.02    0.05
   0  -9   2    0.07    0.06
   0  -9   2    0.07    0.06
   0   9  -3    6.51    0.28
   0   9  -3    6.30    0.28
   0   9  -3    6.48    0.25
   0  -9   3    6.79    0.27
   0  -9   3    6.34    0.26
   0   9  -4    3.87    0.24
   0   9  -4    3.54    0.22
   0   9  -4    3.94    0.25
   0  -9   4    3.85    0.21
   0  -9   4    4.03    0.21
   0   9  -5   -0.07    0.09
   0   9  -5   -0.01    0.09
   0   9  -5   -0.12    0.08
   0   9  -6   -0.05    0.10
   0   9  -6    0.13    0.10
   0   9  -6    0.13    0.11
   0   9  -7    1.47    0.22
   0   9  -7    1.25    0.21
  -1  -9  -7    0.26    0.16
   1   9   6    0.85    0.16
   1   9   6    1.01    0.18
  -1  -9  -6    0.88    0.19
   1   9   5    0.11    0.09
   1   9   5    0.29    0.11
  -1  -9  -5    0.25    0.11
   1   9   4    0.35    0.10
   1   9   4    0.21    0.10
  -1  -9  -4    0.35    0.12
   1   9   3    0.29    0.09
   1   9   3    0.21    0.09
  -1  -9  -3    0.27    0.09
  -1  -9  -3    0.30    0.06
   1   9   2    1.64    0.13
   1   9   2    1.41    0.14
  -1  -9  -2    1.73    0.14
  -1  -9  -2    1.78    0.11
  -1  -9  -2    1.92    0.11
   1   9   1   26.47    0.67
   1   9   1   27.93    0.66
  -1  -9  -1   25.83    0.68
  -1  -9  -1   26.46    0.64
  -1  -9  -1   27.40    0.64
   1   9   0    0.74    0.09
   1   9   0    0.89    0.09
   1   9   0    0.74    0.09
  -1  -9   0    0.77    0.09
  -1  -9   0    0.98    0.10
   1   9  -1   10.23    0.32
   1   9  -1   10.44    0.33
   1   9  -1    9.82    0.29
  -1  -9   1    9.75    0.32
  -1  -9   1   10.18    0.33
   1   9  -2    8.75    0.28
   1   9  -2    9.09    0.30
   1   9  -2    8.67    0.31
  -1  -9   2    8.92    0.31
  -1  -9   2    9.08    0.31
   1   9  -3    4.60    0.21
   1   9  -3    4.19    0.20
   1   9  -3    4.28    0.22
  -1  -9   3    4.14    0.21
  -1  -9   3    4.28    0.21
   1   9  -4    0.46    0.11
   1   9  -4    0.31    0.09
   1   9  -4    0.52    0.11
  -1  -9   4    0.30    0.09
  -1  -9   4    0.14    0.09
   1   9  -5    0.32    0.10
   1   9  -5    0.41    0.12
   1   9  -5    0.24    0.10
  -1  -9   5    0.37    0.11
  -1  -9   5    0.36    0.11
   1   9  -6    1.53    0.19
   1   9  -6    1.61    0.19
   1   9  -6    1.74    0.21
   1   9  -7    0.45    0.15
   2   9   6    2.96    0.30
   2   9   6    3.56    0.28
  -2  -9  -6    2.97    0.32
   2   9   5    0.01    0.08
   2   9   5    0.03    0.09
  -2  -9  -5    0.04    0.10
   2   9   4    2.65    0.22
   2   9   4    2.53    0.21
  -2  -9  -4    2.14    0.24
   2   9   3    1.10    0.15
   2   9   3    0.87    0.14
  -2  -9  -3    0.86    0.14
   2   9   2    0.19    0.07
   2   9   2    0.22    0.08
  -2  -9  -2    0.16    0.08
  -2  -9  -2    0.34    0.06
  -2  -9  -2    0.15    0.05
   2   9   1    9.98    0.35
   2   9   1   10.15    0.34
   2   9   1   10.39    0.37
  -2  -9  -1   10.11    0.31
  -2  -9  -1   10.16    0.31
   2   9   0    0.24    0.07
   2   9   0    0.24    0.07
   2   9   0    0.19    0.06
  -2  -9   0    0.57    0.08
  -2  -9   0    0.09    0.05
   2   9  -1    4.27    0.20
   2   9  -1    3.92    0.19
   2   9  -1    4.46    0.19
  -2  -9   1    4.42    0.20
  -2  -9   1    4.10    0.20
   2   9  -2    0.99    0.11
   2   9  -2    1.10    0.11
   2   9  -2    1.05    0.12
  -2  -9   2    0.82    0.11
  -2  -9   2    0.79    0.11
   2   9  -4    4.15    0.24
   2   9  -4    3.80    0.22
   2   9  -4    4.32    0.23
  -2  -9   4    3.79    0.22
  -2  -9   4    4.27    0.23
   2   9  -5    2.81    0.21
   2   9  -5    3.05    0.23
   2   9  -5    2.63    0.20
  -2  -9   5    2.56    0.20
  -2  -9   5    2.63    0.21
   2   9  -6    0.14    0.10
   2   9  -6    0.05    0.09
   2   9  -6    0.18    0.10
   2   9  -7    0.03    0.11
   2   9  -8    0.67    0.19
   3   9   6    0.00    0.11
   3   9   6   -0.04    0.11
  -3  -9  -6    0.09    0.12
   3   9   5    1.78    0.23
   3   9   5    1.47    0.22
  -3  -9  -5    1.66    0.24
   3   9   4   16.12    0.61
   3   9   4   17.53    0.61
  -3  -9  -4   15.48    0.63
   3   9   3    1.86    0.21
   3   9   3    1.76    0.21
  -3  -9  -3    1.32    0.19
   3   9   2   20.37    0.64
   3   9   2   19.95    0.62
  -3  -9  -2   19.17    0.64
   3   9   1    2.64    0.19
   3   9   1    2.52    0.18
   3   9   1    2.60    0.18
  -3  -9  -1    2.49    0.15
  -3  -9  -1    2.52    0.15
   3   9   0    7.03    0.30
   3   9   0    7.28    0.30
   3   9   0    7.72    0.30
  -3  -9   0    7.52    0.27
  -3  -9   0    7.33    0.28
   3   9  -1   44.98    1.11
   3   9  -1   47.13    1.05
   3   9  -1   45.05    1.07
  -3  -9   1   45.71    1.09
  -3  -9   1   45.11    1.07
   3   9  -2    4.83    0.22
   3   9  -2    5.01    0.24
   3   9  -2    5.07    0.23
  -3  -9   2    4.80    0.24
  -3  -9   2    5.39    0.25
   3   9  -3    0.45    0.09
   3   9  -3    0.26    0.09
   3   9  -3    0.28    0.08
  -3  -9   3    0.46    0.11
  -3  -9   3    0.28    0.09
   3   9  -4    1.62    0.18
   3   9  -4    2.03    0.17
   3   9  -4    1.61    0.16
  -3  -9   4    1.58    0.18
  -3  -9   4    1.93    0.20
   3   9  -5    9.21    0.35
   3   9  -5    8.32    0.35
   3   9  -5    8.74    0.40
  -3  -9   5    8.77    0.38
  -3  -9   5    8.58    0.38
   3   9  -6    1.24    0.19
  -3  -9   6    0.64    0.12
  -3  -9   6    0.49    0.12
   3   9  -7    0.09    0.11
   3   9  -8    0.27    0.14
   4   9   6    0.00    0.12
   4   9   5    3.27    0.34
   4   9   5    2.77    0.32
  -4  -9  -5    2.99    0.34
   4   9   4    0.27    0.13
   4   9   4    0.16    0.11
  -4  -9  -4    0.42    0.14
   4   9   3    4.44    0.30
   4   9   3    4.54    0.31
  -4  -9  -3    4.69    0.32
   4   9   2   15.55    0.56
   4   9   2   13.39    0.52
  -4  -9  -2   14.88    0.56
   4   9   1   10.88    0.43
   4   9   1   11.37    0.45
   4   9   1   11.65    0.46
  -4  -9  -1   11.16    0.36
  -4  -9  -1   11.35    0.36
   4   9   0   17.42    0.58
   4   9   0   17.09    0.53
   4   9   0   17.34    0.55
  -4  -9   0   17.35    0.51
  -4  -9   0   16.99    0.50
   4   9  -1    2.50    0.18
   4   9  -1    2.32    0.17
   4   9  -1    2.23    0.19
  -4  -9   1    2.05    0.17
  -4  -9   1    1.94    0.16
   4   9  -2   15.05    0.50
  -4  -9   2   13.73    0.47
  -4  -9   2   14.20    0.48
   4   9  -3   14.71    0.43
   4   9  -3   14.34    0.45
   4   9  -3   14.07    0.50
  -4  -9   3   14.28    0.50
   4   9  -4    0.91    0.13
   4   9  -4    1.02    0.16
   4   9  -4    0.97    0.13
  -4  -9   4    1.21    0.17
  -4  -9   4    0.70    0.14
   4   9  -5    0.02    0.08
  -4  -9   5    0.19    0.11
  -4  -9   5    0.28    0.12
   4   9  -6    0.05    0.08
  -4  -9   6    0.04    0.09
  -4  -9   6   -0.03    0.08
   4   9  -7    0.92    0.18
  -4  -9   7    0.36    0.12
  -4  -9   7    0.60    0.14
   4   9  -8    0.05    0.12
   5   9   5    1.07    0.23
   5   9   4    0.38    0.16
   5   9   4    0.59    0.17
  -5  -9  -4    0.55    0.16
   5   9   3    2.59    0.29
   5   9   3    2.09    0.26
  -5  -9  -3    2.79    0.29
   5   9   2    2.47    0.26
   5   9   2    2.46    0.26
  -5  -9  -2    2.62    0.27
   5   9   1    1.80    0.22
   5   9   1    1.56    0.20
   5   9   1    1.42    0.20
   5   9   0    1.41    0.19
   5   9   0    1.72    0.21
   5   9   0    1.75    0.20
  -5  -9   0    1.50    0.17
  -5  -9   0    1.35    0.15
   5   9  -1    2.58    0.20
   5   9  -1    2.63    0.22
   5   9  -1    2.29    0.19
  -5  -9   1    2.43    0.20
  -5  -9   1    2.60    0.20
   5   9  -2    0.23    0.09
   5   9  -2    0.00    0.04
   5   9  -2    0.07    0.08
   5   9  -2   -0.01    0.04
  -5  -9   2   -0.02    0.07
   5   9  -3    2.40    0.18
   5   9  -3    2.39    0.19
   5   9  -3    2.47    0.22
   5   9  -3    2.61    0.21
  -5  -9   3    2.79    0.22
   5   9  -4    4.81    0.29
   5   9  -4    4.17    0.23
   5   9  -4    5.12    0.31
  -5  -9   4    4.49    0.28
   5   9  -5    2.77    0.24
  -5  -9   5    3.33    0.26
   5   9  -6    0.20    0.11
  -5  -9   6    0.20    0.11
  -5  -9   6    0.17    0.12
   5   9  -7   -0.01    0.11
  -5  -9   7   -0.07    0.09
  -5  -9   7   -0.02    0.09
   5   9  -8    0.02    0.11
   6   9   4    0.22    0.15
   6   9   3    1.95    0.27
   6   9   3    1.78    0.28
  -6  -9  -3    1.98    0.27
   6   9   2   -0.08    0.10
   6   9   2    0.24    0.14
  -6  -9  -2    0.05    0.10
   6   9   1    1.25    0.20
   6   9   1    1.56    0.22
   6   9   1    1.32    0.21
   6   9   0    0.03    0.09
   6   9   0    0.03    0.09
   6   9   0    0.07    0.09
   6   9  -1   10.34    0.47
   6   9  -1    9.04    0.40
   6   9  -1    9.78    0.43
  -6  -9   1   10.16    0.41
   6   9  -2    1.20    0.17
   6   9  -2    1.15    0.18
  -6  -9   2    0.93    0.16
   6   9  -3    0.20    0.10
   6   9  -3    0.17    0.10
   6   9  -3    0.28    0.12
   6   9  -3    0.22    0.10
  -6  -9   3    0.39    0.13
   6   9  -4    0.19    0.11
   6   9  -4    0.23    0.11
  -6  -9   4    0.06    0.10
   6   9  -5    0.11    0.11
   6   9  -5    0.57    0.14
  -6  -9   5    0.48    0.14
   6   9  -6    1.02    0.19
  -6  -9   6    0.90    0.18
   6   9  -7    1.07    0.21
  -6  -9   7    1.17    0.21
  -6  -9   7    1.29    0.21
  -6  -9   8    0.07    0.12
  -6  -9   8    0.27    0.15
   7   9   3   -0.02    0.13
   7   9   2    0.32    0.16
   7   9   2    0.00    0.12
  -7  -9  -2    0.05    0.11
   7   9   1    2.25    0.28
   7   9   1    2.72    0.30
   7   9   1    2.69    0.31
   7   9   0    0.42    0.15
   7   9   0    0.18    0.13
   7   9   0    0.29    0.13
   7   9  -1    3.22    0.26
   7   9  -1    3.33    0.28
   7   9  -1    2.99    0.25
  -7  -9   1    3.84    0.27
  -7  -9   1    3.12    0.25
   7   9  -2    0.70    0.16
   7   9  -2    0.82    0.16
  -7  -9   2    0.75    0.16
   7   9  -3   11.77    0.53
   7   9  -3   13.23    0.54
  -7  -9   3   12.57    0.53
   7   9  -4    1.93    0.24
   7   9  -4    1.56    0.23
  -7  -9   4    1.78    0.24
   7   9  -5   -0.02    0.10
   7   9  -5   -0.04    0.10
  -7  -9   5    0.01    0.10
   7   9  -6    0.15    0.14
   7   9  -6   -0.01    0.11
  -7  -9   6   -0.15    0.09
   7   9  -7    0.09    0.13
  -7  -9   7   -0.05    0.11
  -7  -9   8    0.32    0.17
   8   9   1   -0.02    0.12
   8   9   0   -0.05    0.11
   8   9   0    0.18    0.12
   8   9   0    0.00    0.10
   8   9  -1    0.26    0.13
   8   9  -1    0.41    0.13
   8   9  -1    0.35    0.15
   8   9  -2    0.01    0.07
   8   9  -2    0.04    0.10
  -8  -9   2    0.27    0.13
   8   9  -3    2.30    0.29
   8   9  -3    1.95    0.25
  -8  -9   3    2.00    0.26
   8   9  -4    0.14    0.12
   8   9  -4   -0.01    0.10
  -8  -9   4    0.01    0.12
   8   9  -5    2.54    0.31
   8   9  -5    2.14    0.28
  -8  -9   5    2.14    0.28
   8   9  -6    0.07    0.14
   8   9  -6    0.06    0.14
  -8  -9   6    0.17    0.14
   9   9   0    0.51    0.18
   9   9  -1   -0.14    0.11
   9   9  -3   -0.03    0.12
  -9  -9   3    0.32    0.15
   9   9  -4    0.08    0.12
  -9  -9   4   -0.07    0.10
   9   9  -5    2.47    0.33
   9   9  -6    0.02    0.14
   9 -10  -6    0.05    0.14
   9 -10  -5    1.61    0.28
   9 -10  -4    0.78    0.20
   9 -10  -3    0.16    0.14
   9 -10  -3    0.16    0.14
   9 -10  -2   -0.01    0.11
   9 -10  -2   -0.12    0.11
   8 -10  -7   -0.19    0.11
   8 -10  -7    0.06    0.13
   8 -10  -6   -0.12    0.10
   8 -10  -6    0.04    0.13
   8 -10  -5    0.99    0.21
   8 -10  -5    0.90    0.21
   8 -10  -4    0.45    0.16
   8 -10  -4    0.67    0.17
   8 -10  -3   -0.01    0.10
   8 -10  -3    0.02    0.11
   8 -10  -2    1.10    0.19
   8 -10  -2    1.62    0.23
   8 -10  -1    1.25    0.20
   8 -10  -1    0.87    0.18
   8 -10   0    0.77    0.19
   8 -10   1    0.46    0.18
   8 -10   1    0.41    0.19
   7 -10  -8   -0.01    0.14
   7 -10  -7    0.87    0.20
   7 -10  -7    0.51    0.17
   7 -10  -7    0.63    0.18
   7 -10  -6   -0.06    0.10
   7 -10  -6    0.13    0.11
   7 -10  -6    0.32    0.14
   7 -10  -5    0.15    0.11
   7 -10  -5    0.14    0.12
   7 -10  -5    0.03    0.07
   7 -10  -4    0.60    0.16
   7 -10  -4    0.90    0.18
   7 -10  -3    1.04    0.18
   7 -10  -3    1.34    0.22
   7 -10  -2    0.84    0.17
   7 -10  -2    1.16    0.18
   7 -10  -1    0.16    0.11
   7 -10  -1    0.08    0.10
   7 -10   0    3.12    0.26
   7 -10   0    2.69    0.29
   7 -10   1    1.99    0.27
   7 -10   1    2.15    0.27
   7 -10   2   -0.01    0.14
   7 -10   2    0.14    0.14
   7 -10   3    0.14    0.15
   6 -10  -7    1.99    0.26
   6 -10  -7    1.74    0.26
   6 -10  -7    1.99    0.26
   6 -10  -6   -0.09    0.09
   6 -10  -6   -0.04    0.10
   6 -10  -6   -0.02    0.10
   6 -10  -5    1.56    0.22
   6 -10  -5    2.14    0.24
   6 -10  -5    1.91    0.22
   6 -10  -4    1.10    0.18
   6 -10  -4    1.07    0.17
   6 -10  -4    0.75    0.16
   6 -10  -3    0.47    0.13
   6 -10  -3    0.13    0.10
   6 -10  -3    0.10    0.08
   6 -10  -2    3.75    0.27
   6 -10  -2    4.03    0.28
   6 -10  -1    1.39    0.19
   6 -10  -1    1.77    0.19
   6 -10  -1    1.34    0.19
   6 -10   0    0.07    0.08
   6 -10   0   -0.10    0.08
   6 -10   0    0.01    0.09
   6 -10   0   -0.09    0.09
   6 -10   1    0.13    0.11
   6 -10   1    0.06    0.12
   6 -10   2    0.71    0.18
   6 -10   2    0.81    0.20
   6 -10   3    0.50    0.18
   6 -10   3    0.72    0.19
   6 -10   4    0.13    0.16
   5 -10  -8    0.47    0.17
   5 -10  -7    0.47    0.14
   5 -10  -7    0.38    0.14
   5 -10  -7    0.36    0.16
   5 -10  -6    1.61    0.23
   5 -10  -6    1.58    0.22
   5 -10  -6    1.00    0.18
   5 -10  -5    2.17    0.23
   5 -10  -5    1.79    0.21
   5 -10  -5    1.92    0.24
   5 -10  -4    0.09    0.09
   5 -10  -4   -0.26    0.06
   5 -10  -4    0.10    0.08
   5 -10  -3    2.03    0.22
   5 -10  -3    2.15    0.18
   5 -10  -3    2.65    0.23
  -5  10   2    3.80    0.19
   5 -10  -2    3.63    0.26
   5 -10  -2    3.69    0.26
   5 -10  -2    3.95    0.21
  -5  10   1    0.34    0.09
   5 -10  -1    0.05    0.09
   5 -10  -1    0.18    0.11
   5 -10  -1    0.17    0.10
   5 -10   0    1.21    0.16
   5 -10   0    1.55    0.19
   5 -10   0    1.41    0.18
   5 -10   0    1.61    0.18
   5 -10   1   12.32    0.44
   5 -10   1   10.85    0.46
   5 -10   1   11.80    0.44
   5 -10   1   12.42    0.49
   5 -10   2    0.08    0.11
   5 -10   2    0.04    0.12
   5 -10   3   -0.06    0.11
   5 -10   3    0.16    0.13
   5 -10   4   -0.04    0.14
   5 -10   4    0.04    0.12
   5 -10   5    0.25    0.18
   4 -10  -8   -0.03    0.12
   4 -10  -7    0.14    0.12
   4 -10  -6    0.18    0.12
   4 -10  -6    0.18    0.10
   4 -10  -6    0.36    0.12
   4 -10  -5    1.72    0.21
   4 -10  -5    1.33    0.17
   4 -10  -5    1.38    0.18
   4 -10  -4    3.91    0.25
   4 -10  -4    3.94    0.25
   4 -10  -4    3.87    0.25
   4 -10  -3    0.42    0.10
   4 -10  -3    0.57    0.12
   4 -10  -3    0.48    0.12
  -4  10   2   10.36    0.31
  -4  10   2   10.67    0.32
   4 -10  -2    9.49    0.40
   4 -10  -2   10.19    0.34
   4 -10  -2   10.39    0.40
  -4  10   1    0.17    0.07
   4 -10  -1    0.29    0.08
   4 -10  -1    0.11    0.05
   4 -10  -1    0.06    0.08
   4 -10  -1    0.06    0.07
  -4  10   0    1.54    0.17
   4 -10   0    1.36    0.16
   4 -10   0    1.95    0.19
   4 -10   0    1.68    0.18
   4 -10   1    0.64    0.12
   4 -10   1    0.89    0.15
   4 -10   1    0.71    0.12
   4 -10   1    0.64    0.14
   4 -10   2    4.07    0.27
   4 -10   2    4.65    0.30
   4 -10   3   12.48    0.53
   4 -10   3   11.41    0.50
   4 -10   4    0.47    0.16
  -4  10  -5    0.14    0.13
   4 -10   5    0.19    0.15
   3 -10  -8    1.02    0.22
   3 -10  -7    0.41    0.15
   3 -10  -6    0.53    0.15
   3 -10  -5    0.04    0.08
   3 -10  -5    0.26    0.11
   3 -10  -4    0.95    0.14
   3 -10  -4    0.88    0.14
   3 -10  -4    0.94    0.15
  -3  10   3    1.25    0.09
   3 -10  -3    0.93    0.13
   3 -10  -3    0.96    0.14
   3 -10  -3    1.16    0.14
  -3  10   2    2.81    0.15
  -3  10   2    2.98    0.14
   3 -10  -2    2.84    0.15
   3 -10  -2    2.91    0.20
   3 -10  -2    2.77    0.19
  -3  10   1    0.63    0.09
  -3  10   1    0.68    0.09
   3 -10  -1    0.58    0.07
   3 -10  -1    0.58    0.11
   3 -10  -1    0.40    0.09
  -3  10   0   12.15    0.40
   3 -10   0   12.74    0.42
   3 -10   0   12.29    0.31
   3 -10   0   12.98    0.40
   3 -10   0   12.40    0.42
  -3  10  -1    2.86    0.20
  -3  10  -1    2.76    0.12
   3 -10   1    2.84    0.18
   3 -10   1    2.33    0.19
   3 -10   1    2.72    0.18
  -3  10  -2    0.13    0.09
   3 -10   2    0.16    0.10
   3 -10   2    0.21    0.08
   3 -10   2    0.15    0.07
   3 -10   3    2.56    0.25
  -3  10  -4    9.24    0.47
   3 -10   4    9.52    0.46
  -3  10  -5    0.96    0.21
   3 -10   5    0.80    0.19
  -3  10  -6    1.60    0.26
   3 -10   6    1.52    0.25
   2 -10  -7    1.08    0.21
   2 -10  -6    2.50    0.27
   2 -10  -5    0.36    0.10
   2 -10  -5    0.97    0.17
   2 -10  -5    0.70    0.11
   2 -10  -4    4.51    0.24
   2 -10  -4    4.31    0.23
   2 -10  -4    3.88    0.25
  -2  10   3    1.67    0.11
  -2  10   3    1.81    0.11
   2 -10  -3    1.64    0.14
   2 -10  -3    1.86    0.15
   2 -10  -3    1.56    0.16
  -2  10   2    7.49    0.23
  -2  10   2    7.02    0.23
   2 -10  -2    7.18    0.25
   2 -10  -2    6.90    0.29
   2 -10  -2    6.96    0.28
  -2  10   1   20.37    0.50
  -2  10   1   20.47    0.52
   2 -10  -1   20.12    0.56
   2 -10  -1   20.24    0.57
   2 -10  -1   20.50    0.49
  -2  10   0    9.18    0.31
  -2  10   0    9.40    0.30
   2 -10   0    9.34    0.32
   2 -10   0    9.36    0.33
  -2  10  -1    0.97    0.05
  -2  10  -1    1.17    0.13
   2 -10   1    0.98    0.12
   2 -10   1    1.20    0.13
  -2  10  -2    1.66    0.11
  -2  10  -2    1.42    0.16
   2 -10   2    1.79    0.15
   2 -10   2    1.76    0.15
   2 -10   2    1.70    0.17
  -2  10  -3    2.54    0.24
   2 -10   3    2.44    0.17
   2 -10   3    2.74    0.25
   2 -10   3    2.39    0.16
  -2  10  -4    0.11    0.11
   2 -10   4    0.28    0.12
  -2  10  -5    6.16    0.38
   2 -10   5    5.46    0.35
  -2  10  -6    1.53    0.24
   2 -10   6    1.54    0.23
   2 -10   7   -0.22    0.11
   1 -10  -7   -0.05    0.11
   1 -10  -6    0.61    0.16
   1 -10  -5    2.40    0.26
  -1  10   4   17.44    0.48
  -1  10   4   17.84    0.49
   1 -10  -4   17.92    0.51
   1 -10  -4   17.30    0.59
   1 -10  -4   17.30    0.50
  -1  10   3    0.36    0.07
  -1  10   3    0.43    0.08
   1 -10  -3    0.42    0.10
   1 -10  -3    0.30    0.08
   1 -10  -3    0.47    0.09
  -1  10   2   48.19    1.05
  -1  10   2   46.84    1.02
   1 -10  -2   47.84    1.09
   1 -10  -2   47.55    1.10
   1 -10  -2   46.58    1.10
  -1  10   1    9.03    0.28
  -1  10   1    9.15    0.29
   1 -10  -1    9.54    0.27
   1 -10  -1    8.89    0.31
   1 -10  -1    8.66    0.30
  -1  10   0   14.13    0.40
  -1  10   0   14.54    0.42
   1 -10   0   14.72    0.32
   1 -10   0   15.01    0.43
   1 -10   0   14.63    0.42
  -1  10  -1   74.65    1.59
  -1  10  -1   75.49    1.65
   1 -10   1   74.43    1.64
   1 -10   1   75.84    1.66
  -1  10  -2   11.13    0.39
  -1  10  -2   12.26    0.32
  -1  10  -2   11.45    0.40
   1 -10   2   11.63    0.37
   1 -10   2   12.20    0.38
  -1  10  -3    7.44    0.33
  -1  10  -3    7.15    0.26
   1 -10   3    7.23    0.28
   1 -10   3    6.97    0.28
  -1  10  -4    5.81    0.32
  -1  10  -4    5.79    0.27
   1 -10   4    5.01    0.30
  -1  10  -5    3.88    0.28
   1 -10   5    4.13    0.28
  -1  10  -6    0.16    0.12
  -1  10  -7    4.14    0.34
  -1  10  -7    3.89    0.37
   0 -10  -7    3.43    0.36
   0 -10  -6    4.21    0.34
   0  10   5    2.95    0.21
   0  10   5    2.36    0.19
   0 -10  -5    2.89    0.25
   0  10   4    0.75    0.13
   0  10   4    0.98    0.13
   0 -10  -4    1.07    0.17
   0  10   3   29.02    0.71
   0  10   3   28.06    0.73
   0 -10  -3   28.18    0.79
   0 -10  -3   29.20    0.71
   0 -10  -3   29.28    0.70
   0  10   2   55.12    1.24
   0  10   2   55.16    1.20
   0 -10  -2   56.32    1.25
   0 -10  -2   57.23    1.24
   0 -10  -2   55.13    1.30
   0  10   1   11.56    0.34
   0  10   1   11.19    0.35
   0 -10  -1   11.31    0.35
   0 -10  -1   11.34    0.34
   0 -10  -1   11.74    0.34
   0  10   0  156.40    3.21
   0  10   0  157.20    3.11
   0  10   0  157.61    3.25
   0 -10   0  155.13    3.23
   0 -10   0  155.38    3.26
   0  10  -1   11.95    0.35
   0  10  -1   11.43    0.36
   0  10  -1   11.31    0.29
   0 -10   1   11.51    0.36
   0 -10   1   11.50    0.36
   0  10  -2   55.50    1.19
   0  10  -2   52.52    1.25
   0  10  -2   54.82    1.21
   0 -10   2   53.25    1.23
   0 -10   2   55.05    1.24
   0  10  -3   27.89    0.73
   0  10  -3   28.27    0.76
   0  10  -3   29.19    0.72
   0 -10   3   28.36    0.73
   0 -10   3   28.40    0.73
   0  10  -4    1.06    0.16
   0  10  -4    1.17    0.16
   0  10  -4    0.92    0.13
   0 -10   4    1.13    0.14
   0 -10   4    0.99    0.14
   0  10  -5    3.14    0.23
   0  10  -5    3.18    0.25
   0  10  -5    3.02    0.24
   0  10  -6    4.57    0.31
   0  10  -6    4.25    0.30
   0  10  -7    3.51    0.30
   0  10  -7    3.25    0.33
   1  10   6   -0.05    0.09
  -1 -10  -6    0.08    0.11
   1  10   5    3.55    0.24
   1  10   5    3.70    0.25
  -1 -10  -5    3.51    0.28
   1  10   4    5.50    0.28
   1  10   4    5.16    0.28
  -1 -10  -4    5.07    0.31
   1  10   3    6.63    0.30
   1  10   3    7.05    0.30
  -1 -10  -3    6.31    0.32
  -1 -10  -3    7.06    0.23
   1  10   2   11.42    0.37
   1  10   2   11.23    0.38
  -1 -10  -2   11.52    0.33
  -1 -10  -2   11.04    0.40
  -1 -10  -2   11.67    0.34
   1  10   1   73.09    1.61
   1  10   1   76.30    1.57
  -1 -10  -1   72.41    1.66
  -1 -10  -1   74.41    1.59
  -1 -10  -1   73.66    1.60
   1  10   0   14.01    0.39
   1  10   0   14.05    0.41
   1  10   0   14.17    0.40
  -1 -10   0   13.64    0.40
  -1 -10   0   14.06    0.41
   1  10  -1    9.31    0.30
   1  10  -1    9.31    0.28
   1  10  -1    8.66    0.31
  -1 -10   1    8.82    0.31
  -1 -10   1    8.86    0.31
   1  10  -2   47.47    1.07
   1  10  -2   47.14    1.10
   1  10  -2   46.22    1.05
  -1 -10   2   46.80    1.10
  -1 -10   2   45.82    1.09
   1  10  -3    0.40    0.10
   1  10  -3    0.37    0.09
   1  10  -3    0.31    0.07
  -1 -10   3    0.43    0.09
  -1 -10   3    0.55    0.11
   1  10  -4   18.62    0.55
   1  10  -4   17.39    0.56
   1  10  -4   17.57    0.54
  -1 -10   4   18.22    0.54
  -1 -10   4   17.87    0.55
   1  10  -5    2.39    0.21
   1  10  -5    2.87    0.22
   1  10  -5    2.58    0.22
  -1 -10   5    2.64    0.21
  -1 -10   5    2.28    0.19
   1  10  -6    0.07    0.06
   1  10  -6    0.08    0.06
   1  10  -6    0.48    0.14
   2  10   6    1.33    0.21
   2  10   6    1.29    0.20
  -2 -10  -6    1.35    0.24
   2  10   5    5.86    0.34
   2  10   5    5.52    0.33
  -2 -10  -5    6.27    0.38
   2  10   4    0.21    0.11
   2  10   4    0.17    0.10
  -2 -10  -4    0.18    0.11
   2  10   3    2.91    0.21
   2  10   3    2.33    0.22
  -2 -10  -3    2.71    0.22
   2  10   2    1.66    0.17
   2  10   2    1.37    0.15
  -2 -10  -2    1.70    0.18
  -2 -10  -2    1.43    0.11
  -2 -10  -2    1.64    0.11
   2  10   1    1.01    0.12
   2  10   1    0.80    0.12
   2  10   1    0.98    0.12
  -2 -10  -1    1.01    0.11
  -2 -10  -1    1.08    0.11
   2  10   0    9.17    0.32
   2  10   0    8.84    0.31
   2  10   0    8.95    0.32
  -2 -10   0    8.89    0.31
  -2 -10   0    9.13    0.31
   2  10  -1   19.36    0.54
   2  10  -1   19.51    0.54
   2  10  -1   19.09    0.52
  -2 -10   1   19.90    0.54
  -2 -10   1   19.84    0.54
   2  10  -2    7.14    0.27
   2  10  -2    7.23    0.28
   2  10  -2    7.02    0.27
  -2 -10   2    6.80    0.28
  -2 -10   2    6.69    0.28
   2  10  -3    1.53    0.15
   2  10  -3    1.60    0.14
   2  10  -3    1.88    0.16
  -2 -10   3    1.49    0.16
  -2 -10   3    1.96    0.16
   2  10  -4    3.87    0.22
   2  10  -4    2.19    0.16
   2  10  -4    2.31    0.17
  -2 -10   4    3.61    0.23
  -2 -10   4    3.75    0.23
   2  10  -5    0.73    0.14
   2  10  -5    0.89    0.15
   2  10  -5    0.90    0.15
  -2 -10   5    0.80    0.14
  -2 -10   5    0.94    0.15
   2  10  -6    2.42    0.25
   2  10  -6    2.65    0.22
   2  10  -6    2.41    0.23
   2  10  -7    0.64    0.17
   3  10   6    1.24    0.22
   3  10   6    1.11    0.21
   3  10   5    0.89    0.18
   3  10   5    0.71    0.17
  -3 -10  -5    1.20    0.21
   3  10   4    8.66    0.42
   3  10   4    9.01    0.43
  -3 -10  -4    8.29    0.44
   3  10   3    2.45    0.25
   3  10   3    2.51    0.25
  -3 -10  -3    2.55    0.23
   3  10   2    0.11    0.09
   3  10   2   -0.03    0.07
  -3 -10  -2    0.29    0.10
   3  10   1    2.57    0.19
   3  10   1    2.42    0.19
   3  10   1    2.67    0.19
  -3 -10  -1    2.63    0.16
  -3 -10  -1    2.57    0.16
   3  10   0   11.37    0.39
   3  10   0   11.31    0.40
   3  10   0   11.68    0.41
  -3 -10   0   11.57    0.37
  -3 -10   0   11.95    0.38
   3  10  -1    0.61    0.10
   3  10  -1    0.63    0.11
  -3 -10   1    0.64    0.11
  -3 -10   1    0.28    0.08
   3  10  -2    2.91    0.18
   3  10  -2    2.79    0.18
   3  10  -2    3.48    0.20
  -3 -10   2    3.00    0.20
  -3 -10   2    3.05    0.20
   3  10  -3    0.75    0.13
   3  10  -3    0.76    0.11
   3  10  -3    0.88    0.12
  -3 -10   3    1.18    0.15
  -3 -10   3    0.91    0.14
   3  10  -4    0.74    0.13
   3  10  -4    0.82    0.13
   3  10  -4    0.80    0.13
  -3 -10   4    0.74    0.14
  -3 -10   4    1.14    0.16
   3  10  -5    0.08    0.09
   3  10  -5   -0.04    0.09
   3  10  -5    0.13    0.09
  -3 -10   5    0.02    0.09
  -3 -10   5   -0.03    0.09
   3  10  -6    0.34    0.13
  -3 -10   6    0.00    0.04
  -3 -10   6    0.02    0.04
   3  10  -7    0.63    0.16
   3  10  -8    0.64    0.19
   4  10   5   -0.09    0.09
   4  10   5    0.35    0.15
  -4 -10  -5    0.00    0.11
   4  10   4    0.57    0.16
   4  10   4    0.55    0.16
  -4 -10  -4    0.42    0.15
   4  10   3   11.14    0.48
   4  10   3   10.97    0.49
  -4 -10  -3   10.97    0.51
   4  10   2    3.47    0.27
   4  10   2    3.78    0.27
  -4 -10  -2    3.70    0.27
   4  10   1    0.60    0.13
   4  10   1    0.64    0.14
   4  10   1    0.67    0.14
  -4 -10  -1    0.35    0.09
  -4 -10  -1    0.55    0.10
   4  10   0    1.44    0.18
   4  10   0    1.21    0.16
   4  10   0    1.45    0.17
  -4 -10   0    1.45    0.15
  -4 -10   0    1.40    0.16
   4  10  -1    0.06    0.08
   4  10  -1    0.04    0.07
   4  10  -1    0.18    0.09
  -4 -10   1   -0.03    0.07
  -4 -10   1    0.06    0.07
   4  10  -2   10.14    0.40
   4  10  -2    9.85    0.37
   4  10  -2   10.07    0.36
  -4 -10   2   10.02    0.38
  -4 -10   2    9.78    0.38
   4  10  -3    0.48    0.10
   4  10  -3    0.47    0.11
   4  10  -3    0.39    0.10
  -4 -10   3    0.35    0.11
  -4 -10   3    0.40    0.11
   4  10  -4    3.62    0.21
   4  10  -4    3.91    0.21
   4  10  -4    3.56    0.25
  -4 -10   4    3.79    0.25
  -4 -10   4    4.16    0.26
   4  10  -5    1.32    0.19
  -4 -10   5    1.22    0.19
  -4 -10   5    1.55    0.20
   4  10  -6    0.08    0.10
  -4 -10   6    0.20    0.10
  -4 -10   6    0.31    0.12
   4  10  -7    0.21    0.12
  -4 -10   7    0.21    0.12
  -4 -10   7    0.37    0.14
   4  10  -8   -0.13    0.10
   5  10   5    0.25    0.16
   5  10   4   -0.04    0.11
   5  10   4    0.01    0.12
  -5 -10  -4    0.14    0.12
   5  10   3    0.10    0.11
   5  10   3    0.04    0.11
  -5 -10  -3    0.02    0.10
   5  10   2    0.12    0.10
   5  10   2   -0.01    0.09
  -5 -10  -2   -0.03    0.08
   5  10   1   10.43    0.46
   5  10   1   11.38    0.49
   5  10   1   11.24    0.48
   5  10   0    1.85    0.21
   5  10   0    1.70    0.21
   5  10   0    1.76    0.20
  -5 -10   0    1.29    0.16
  -5 -10   0    1.56    0.18
   5  10  -1    0.28    0.11
   5  10  -1    0.35    0.11
   5  10  -1    0.17    0.09
  -5 -10   1    0.30    0.11
  -5 -10   1    0.16    0.09
   5  10  -2    3.67    0.23
   5  10  -2    2.97    0.21
   5  10  -2    3.61    0.25
  -5 -10   2    3.28    0.24
  -5 -10   2    3.41    0.23
   5  10  -3    1.79    0.21
   5  10  -3    1.88    0.18
   5  10  -3    1.82    0.18
  -5 -10   3    1.61    0.19
   5  10  -4    0.02    0.08
   5  10  -4    0.04    0.08
   5  10  -4    0.15    0.10
  -5 -10   4   -0.04    0.09
   5  10  -5    1.93    0.23
  -5 -10   5    1.74    0.21
  -5 -10   5    1.89    0.23
   5  10  -6    1.11    0.19
  -5 -10   6    1.16    0.19
  -5 -10   6    1.56    0.22
   5  10  -7    0.36    0.15
  -5 -10   7    0.33    0.15
  -5 -10   7    0.54    0.15
   5  10  -8    0.36    0.16
   6  10   4    0.20    0.15
   6  10   3    0.47    0.18
   6  10   3    0.89    0.20
  -6 -10  -3    0.70    0.17
   6  10   2    0.82    0.19
   6  10   2    0.99    0.20
  -6 -10  -2    0.89    0.18
   6  10   1   -0.07    0.08
   6  10   1    0.09    0.10
   6  10   1    0.06    0.10
   6  10   0   -0.05    0.08
   6  10   0    0.07    0.09
   6  10   0    0.03    0.09
   6  10  -1    1.27    0.18
   6  10  -1    1.49    0.21
   6  10  -1    1.76    0.21
  -6 -10   1    1.41    0.18
  -6 -10   1    1.79    0.21
   6  10  -2    3.60    0.24
   6  10  -2    3.29    0.26
   6  10  -2    3.03    0.22
  -6 -10   2    3.39    0.24
   6  10  -3    0.42    0.11
   6  10  -3    0.12    0.09
   6  10  -3    0.42    0.13
   6  10  -3    0.17    0.10
  -6 -10   3    0.20    0.11
   6  10  -4    0.98    0.17
   6  10  -4    0.92    0.17
  -6 -10   4    0.84    0.16
   6  10  -5    1.84    0.24
  -6 -10   5    2.12    0.25
   6  10  -6   -0.01    0.08
  -6 -10   6   -0.06    0.11
  -6 -10   6    0.05    0.11
   6  10  -7    2.65    0.31
  -6 -10   7    2.52    0.29
  -6 -10   7    2.21    0.28
  -6 -10   8    0.07    0.14
  -6 -10   8    0.16    0.13
   7  10   3    0.22    0.16
   7  10   2    0.20    0.15
  -7 -10  -2    0.24    0.14
   7  10   1    1.89    0.26
   7  10   1    2.17    0.27
   7  10   1    1.41    0.24
   7  10   0    3.34    0.28
   7  10   0    2.72    0.30
   7  10   0    2.66    0.29
   7  10  -1    0.30    0.13
   7  10  -1    0.06    0.10
   7  10  -1    0.23    0.12
  -7 -10   1    0.41    0.12
  -7 -10   1    0.28    0.12
   7  10  -2    1.25    0.18
   7  10  -2    1.13    0.19
   7  10  -2    1.49    0.20
  -7 -10   2    0.87    0.17
   7  10  -3    1.23    0.20
   7  10  -3    1.22    0.20
  -7 -10   3    1.18    0.20
   7  10  -4    0.80    0.18
   7  10  -4    0.64    0.16
  -7 -10   4    0.79    0.18
   7  10  -5    0.04    0.11
   7  10  -5    0.19    0.13
  -7 -10   5    0.17    0.13
   7  10  -6   -0.13    0.10
  -7 -10   6    0.10    0.12
   7  10  -7    0.94    0.22
  -7 -10   7    0.94    0.20
  -7 -10   7    0.66    0.19
  -7 -10   8    0.06    0.14
   8  10   1    0.31    0.16
   8  10   0    0.58    0.18
   8  10   0    0.52    0.17
   8  10   0    0.74    0.19
   8  10  -1    1.28    0.21
   8  10  -1    1.45    0.23
   8  10  -1    1.40    0.24
   8  10  -2    1.30    0.20
   8  10  -2    1.71    0.25
   8  10  -2    0.95    0.17
  -8 -10   2    1.53    0.22
  -8 -10   2    2.03    0.25
   8  10  -3    0.08    0.11
  -8 -10   3    0.01    0.12
   8  10  -4    0.58    0.17
   8  10  -4    0.65    0.18
  -8 -10   4    0.73    0.18
   8  10  -5    1.13    0.22
   8  10  -5    1.31    0.24
  -8 -10   5    1.03    0.21
   8  10  -6    0.06    0.12
  -8 -10   7    0.10    0.15
   9  10  -1    0.42    0.16
   9  10  -1    0.39    0.16
  -9 -10   3    0.24    0.15
  -9 -10   4    0.69    0.19
   9 -11  -6    1.51    0.27
   9 -11  -5    1.92    0.29
   9 -11  -4    0.24    0.15
   9 -11  -3    0.03    0.12
   9 -11  -3    0.11    0.14
   9 -11  -2    0.02    0.11
   9 -11  -2    0.01    0.13
   8 -11  -7   -0.10    0.12
   8 -11  -6   -0.05    0.12
   8 -11  -5    5.14    0.37
   8 -11  -5    4.51    0.36
   8 -11  -4    3.05    0.32
   8 -11  -4    2.35    0.29
   8 -11  -3    5.38    0.36
   8 -11  -3    5.89    0.38
   8 -11  -2    0.42    0.13
   8 -11  -2    0.00    0.11
   8 -11  -1    0.24    0.14
   8 -11  -1    0.14    0.11
   8 -11   1   -0.02    0.13
   7 -11  -8   -0.01    0.13
   7 -11  -7   -0.02    0.12
   7 -11  -7    0.05    0.13
   7 -11  -7   -0.10    0.11
   7 -11  -6   -0.04    0.10
   7 -11  -6    0.08    0.12
   7 -11  -6    0.09    0.12
   7 -11  -5   -0.04    0.10
   7 -11  -5    0.16    0.11
   7 -11  -4    0.01    0.11
   7 -11  -4    0.12    0.10
   7 -11  -3    6.02    0.37
   7 -11  -3    6.42    0.37
   7 -11  -2    1.89    0.24
   7 -11  -2    2.29    0.26
   7 -11  -1    4.34    0.30
   7 -11  -1    4.08    0.30
   7 -11   0    0.15    0.12
   7 -11   1    0.45    0.17
   7 -11   1    0.01    0.12
   7 -11   2    0.06    0.13
   7 -11   2    0.11    0.15
   7 -11   3    0.44    0.19
   6 -11  -7    0.27    0.14
   6 -11  -7    0.28    0.13
   6 -11  -7    0.22    0.13
   6 -11  -6    0.04    0.10
   6 -11  -6   -0.07    0.09
   6 -11  -6   -0.01    0.10
   6 -11  -5   -0.04    0.07
   6 -11  -5    0.16    0.13
   6 -11  -5    0.17    0.11
   6 -11  -4   -0.02    0.07
   6 -11  -4    0.05    0.09
   6 -11  -4    0.17    0.11
   6 -11  -3    2.30    0.25
   6 -11  -3    2.45    0.26
   6 -11  -2    1.02    0.18
   6 -11  -2    0.96    0.18
  -6  11   1   19.14    0.61
   6 -11  -1   19.15    0.59
   6 -11  -1   18.90    0.65
   6 -11  -1   19.65    0.65
   6 -11   0    1.65    0.19
   6 -11   0    1.81    0.21
   6 -11   1    2.70    0.29
   6 -11   1    2.65    0.27
   6 -11   2    0.30    0.14
   6 -11   2    0.25    0.15
   6 -11   3    0.16    0.13
   6 -11   4   -0.08    0.14
   5 -11  -7    1.12    0.19
   5 -11  -7    1.08    0.22
   5 -11  -7    0.96    0.19
   5 -11  -6    1.34    0.21
   5 -11  -6    1.54    0.22
   5 -11  -6    1.90    0.24
   5 -11  -5    2.83    0.24
   5 -11  -5    2.52    0.22
   5 -11  -5    3.32    0.25
   5 -11  -4    0.49    0.13
   5 -11  -4    0.50    0.12
   5 -11  -4    0.34    0.12
   5 -11  -3    0.37    0.13
   5 -11  -3    0.38    0.12
   5 -11  -3    0.34    0.10
   5 -11  -2    1.28    0.18
   5 -11  -2    1.21    0.18
   5 -11  -2    1.09    0.13
  -5  11   1    3.96    0.22
   5 -11  -1    3.92    0.26
   5 -11  -1    3.57    0.21
   5 -11  -1    3.89    0.26
  -5  11   0    0.01    0.08
   5 -11   0   -0.03    0.09
   5 -11   0    0.01    0.09
   5 -11   0   -0.05    0.08
   5 -11   1   42.19    1.06
   5 -11   1   40.16    1.06
   5 -11   1   39.45    1.07
   5 -11   2   10.82    0.48
   5 -11   2   11.01    0.50
   5 -11   3    6.08    0.39
  -5  11  -4    0.02    0.11
   5 -11   4   -0.11    0.11
   5 -11   5    0.00    0.14
   4 -11  -8    0.01    0.14
   4 -11  -7    0.63    0.17
   4 -11  -6   -0.05    0.08
   4 -11  -6    0.09    0.09
   4 -11  -6   -0.01    0.09
   4 -11  -5    6.27    0.34
   4 -11  -5    7.05    0.34
   4 -11  -5    6.24    0.33
   4 -11  -4    1.16    0.17
   4 -11  -4    0.99    0.16
   4 -11  -3    8.28    0.37
   4 -11  -3    9.04    0.34
   4 -11  -3    9.11    0.39
  -4  11   2    0.57    0.09
  -4  11   2    0.50    0.08
   4 -11  -2    0.56    0.12
   4 -11  -2    0.57    0.09
   4 -11  -2    0.34    0.11
  -4  11   1   12.00    0.38
  -4  11   1   11.16    0.38
   4 -11  -1   11.60    0.43
   4 -11  -1   11.42    0.43
   4 -11  -1   11.88    0.34
  -4  11   0    0.28    0.09
   4 -11   0    0.24    0.10
   4 -11   0    0.26    0.10
   4 -11   0    0.20    0.10
  -4  11  -1    0.51    0.13
   4 -11   1    0.67    0.14
   4 -11   1    0.58    0.12
   4 -11   1    0.57    0.12
   4 -11   2    1.87    0.22
   4 -11   3    8.57    0.43
  -4  11  -4    3.11    0.33
   4 -11   4    2.79    0.32
  -4  11  -5    1.49    0.26
   4 -11   5    1.71    0.27
   3 -11  -7    0.50    0.17
   3 -11  -6    2.21    0.26
   3 -11  -5    2.63    0.23
   3 -11  -5    2.97    0.24
   3 -11  -5    3.18    0.23
   3 -11  -4    1.50    0.18
   3 -11  -4    1.44    0.17
   3 -11  -4    0.85    0.15
  -3  11   3   35.08    0.77
   3 -11  -3   35.43    0.92
   3 -11  -3   32.42    0.89
   3 -11  -3   33.57    0.88
  -3  11   2    2.38    0.14
  -3  11   2    2.65    0.15
   3 -11  -2    2.81    0.19
   3 -11  -2    2.51    0.15
   3 -11  -2    2.82    0.21
  -3  11   1    9.89    0.33
  -3  11   1   10.01    0.32
   3 -11  -1   10.07    0.38
   3 -11  -1   10.31    0.29
   3 -11  -1   10.71    0.39
  -3  11   0    4.86    0.24
  -3  11   0    5.15    0.24
   3 -11   0    5.36    0.26
   3 -11   0    5.08    0.15
   3 -11   0    5.29    0.25
  -3  11  -1   10.01    0.38
   3 -11   1    9.69    0.37
  -3  11  -2    0.44    0.12
   3 -11   2    0.07    0.10
   3 -11   2    0.24    0.08
   3 -11   2    0.21    0.09
  -3  11  -3    1.04    0.18
   3 -11   3    1.11    0.18
  -3  11  -4    0.00    0.10
   3 -11   4    0.07    0.11
  -3  11  -5    0.17    0.13
   3 -11   5   -0.03    0.12
   3 -11   6   -0.01    0.15
   2 -11  -7    2.22    0.29
   2 -11  -6    0.13    0.11
   2 -11  -5    0.98    0.14
   2 -11  -5    1.10    0.14
   2 -11  -5    1.03    0.18
   2 -11  -4    5.30    0.29
   2 -11  -4    5.13    0.26
   2 -11  -4    5.53    0.27
  -2  11   3   17.39    0.43
  -2  11   3   17.31    0.44
   2 -11  -3   16.71    0.52
   2 -11  -3   17.05    0.52
  -2  11   2    4.28    0.18
  -2  11   2    4.22    0.18
   2 -11  -2    4.39    0.19
   2 -11  -2    4.26    0.22
   2 -11  -2    4.84    0.24
  -2  11   1  100.19    2.09
  -2  11   1   99.00    2.01
   2 -11  -1   95.86    2.14
   2 -11  -1   98.58    2.16
   2 -11  -1  100.00    2.08
  -2  11   0   34.73    0.82
  -2  11   0   34.97    0.85
   2 -11   0   36.03    0.88
   2 -11   0   34.80    0.87
  -2  11  -1   12.85    0.43
  -2  11  -1   12.68    0.41
   2 -11   1   12.89    0.41
   2 -11   1   12.31    0.41
  -2  11  -2    1.44    0.17
   2 -11   2    1.54    0.15
   2 -11   2    1.95    0.19
   2 -11   2    1.82    0.15
  -2  11  -3    0.60    0.13
   2 -11   3    0.68    0.14
   2 -11   3    0.53    0.11
   2 -11   3    0.72    0.11
  -2  11  -4    2.40    0.25
   2 -11   4    2.58    0.26
  -2  11  -5    0.01    0.11
   2 -11   5   -0.03    0.11
  -2  11  -6    0.33    0.14
   2 -11   6    0.05    0.13
   1 -11  -7    1.26    0.23
   1 -11  -6    1.50    0.22
   1 -11  -5    8.96    0.44
  -1  11   4    0.31    0.08
   1 -11  -4    0.57    0.10
   1 -11  -4    0.35    0.09
   1 -11  -4    0.40    0.12
  -1  11   3    0.04    0.06
  -1  11   3    0.22    0.07
   1 -11  -3    0.21    0.08
   1 -11  -3    0.05    0.06
   1 -11  -3    0.08    0.07
  -1  11   2    2.05    0.13
  -1  11   2    2.24    0.13
   1 -11  -2    2.38    0.16
   1 -11  -2    2.18    0.16
   1 -11  -2    2.15    0.14
  -1  11   1   53.96    1.17
  -1  11   1   54.60    1.21
   1 -11  -1   55.54    1.25
   1 -11  -1   54.28    1.20
   1 -11  -1   55.30    1.26
  -1  11   0    7.67    0.28
  -1  11   0    7.56    0.27
   1 -11   0    7.53    0.28
   1 -11   0    7.93    0.29
   1 -11   0    7.51    0.19
  -1  11  -1   86.50    1.79
  -1  11  -1   82.57    1.84
   1 -11   1   85.69    1.86
   1 -11   1   83.13    1.84
  -1  11  -3    5.82    0.23
  -1  11  -3    5.58    0.29
  -1  11  -3    4.82    0.27
   1 -11   3    5.10    0.25
   1 -11   3    5.06    0.24
  -1  11  -4    0.47    0.13
  -1  11  -5    0.04    0.10
  -1  11  -6    1.54    0.23
  -1  11  -6    1.37    0.22
  -1  11  -7    0.62    0.18
  -1  11  -7    0.44    0.16
   0 -11  -7    0.46    0.18
   0 -11  -6    0.03    0.10
   0  11   5    1.16    0.16
   0  11   5    1.34    0.16
   0 -11  -5    1.27    0.20
   0  11   4    2.34    0.18
   0  11   4    2.54    0.18
   0 -11  -4    2.74    0.23
   0  11   3   24.32    0.66
   0  11   3   24.91    0.64
   0 -11  -3   25.05    0.72
   0 -11  -3   24.70    0.63
   0 -11  -3   24.81    0.63
   0  11   2    6.13    0.25
   0  11   2    6.08    0.24
   0 -11  -2    5.97    0.24
   0 -11  -2    5.98    0.26
   0 -11  -2    6.08    0.24
   0  11   1   16.87    0.45
   0  11   1   16.54    0.47
   0 -11  -1   16.09    0.46
   0 -11  -1   17.32    0.48
   0 -11  -1   16.94    0.46
   0  11   0    0.06    0.06
   0  11   0    0.05    0.03
   0  11   0    0.07    0.06
   0 -11   0    0.06    0.05
   0 -11   0    0.03    0.05
   0  11  -1   17.09    0.47
   0  11  -1   16.23    0.40
   0  11  -1   17.38    0.49
   0 -11   1   16.51    0.48
   0  11  -2    6.26    0.20
   0  11  -2    6.25    0.26
   0  11  -2    5.70    0.26
   0 -11   2    5.97    0.26
   0 -11   2    6.02    0.26
   0  11  -3   25.49    0.64
   0  11  -3   24.95    0.67
   0  11  -3   24.01    0.70
   0 -11   3   24.21    0.67
   0 -11   3   24.60    0.67
   0  11  -4    3.01    0.25
   0  11  -4    2.52    0.21
   0  11  -4    2.41    0.17
   0 -11   4    2.41    0.18
   0 -11   4    2.24    0.18
   0  11  -5    1.24    0.19
   0  11  -5    1.48    0.20
   0  11  -5    1.10    0.15
   0  11  -6    0.07    0.10
   0  11  -6    0.05    0.11
   0  11  -7    0.29    0.15
   0  11  -7    0.60    0.17
  -1 -11  -6    0.82    0.19
   1  11   5    0.25    0.11
   1  11   5    0.13    0.09
  -1 -11  -5    0.05    0.10
   1  11   4    0.68    0.13
   1  11   4    0.53    0.13
  -1 -11  -4    0.47    0.13
   1  11   3    5.36    0.26
   1  11   3    5.19    0.27
  -1 -11  -3    5.16    0.20
  -1 -11  -3    5.05    0.28
   1  11   2   18.46    0.52
   1  11   2   17.61    0.52
  -1 -11  -2   17.58    0.55
  -1 -11  -2   18.06    0.49
  -1 -11  -2   18.34    0.48
   1  11   1   80.88    1.79
   1  11   1   83.43    1.74
  -1 -11  -1   82.96    1.77
  -1 -11  -1   82.95    1.79
  -1 -11  -1   81.74    1.84
   1  11   0    7.46    0.27
   1  11   0    7.64    0.28
   1  11   0    7.24    0.25
  -1 -11   0    7.50    0.27
  -1 -11   0    7.08    0.26
   1  11  -1   53.76    1.22
  -1 -11   1   56.44    1.27
  -1 -11   1   53.80    1.25
   1  11  -2    2.21    0.16
   1  11  -2    2.20    0.17
   1  11  -2    2.44    0.14
  -1 -11   2    2.19    0.16
  -1 -11   2    2.45    0.17
   1  11  -3    0.17    0.06
   1  11  -3    0.29    0.09
   1  11  -3    0.15    0.08
  -1 -11   3    0.24    0.09
  -1 -11   3    0.15    0.08
   1  11  -4    0.45    0.11
   1  11  -4    0.56    0.11
   1  11  -4    0.52    0.12
  -1 -11   4    0.39    0.11
  -1 -11   4    0.55    0.11
   1  11  -5    8.90    0.40
   1  11  -5    8.70    0.38
   1  11  -5    8.64    0.38
  -1 -11   5    8.42    0.36
  -1 -11   5    9.29    0.37
   1  11  -6    2.17    0.24
   1  11  -6    2.39    0.25
   1  11  -6    2.01    0.23
   1  11  -7    0.24    0.10
   2  11   6    0.23    0.12
   2  11   6    0.30    0.14
  -2 -11  -6    0.24    0.14
   2  11   5    0.04    0.10
   2  11   5   -0.03    0.09
  -2 -11  -5    0.08    0.11
   2  11   4    2.00    0.22
   2  11   4    2.48    0.21
  -2 -11  -4    2.20    0.24
   2  11   3    0.74    0.14
  -2 -11  -3    0.72    0.14
   2  11   2    1.54    0.16
   2  11   2    1.54    0.17
  -2 -11  -2    1.59    0.12
  -2 -11  -2    1.62    0.18
  -2 -11  -2    1.51    0.13
   2  11   1   11.75    0.40
   2  11   1   12.41    0.40
   2  11   1   11.42    0.41
  -2 -11  -1   11.84    0.36
  -2 -11  -1   11.43    0.36
   2  11   0   35.21    0.84
   2  11   0   35.36    0.88
   2  11   0   33.89    0.86
  -2 -11   0   34.90    0.85
  -2 -11   0   34.62    0.85
   2  11  -1   92.62    2.04
   2  11  -1   94.88    2.08
   2  11  -1   96.74    1.99
  -2 -11   1   95.56    2.07
  -2 -11   1   93.78    2.06
   2  11  -2    4.05    0.22
   2  11  -2    4.30    0.21
   2  11  -2    4.04    0.20
  -2 -11   2    4.55    0.23
  -2 -11   2    3.97    0.22
   2  11  -3   16.35    0.48
   2  11  -3   16.64    0.51
   2  11  -3   15.73    0.48
  -2 -11   3   16.10    0.51
  -2 -11   3   16.02    0.51
   2  11  -4    3.38    0.23
   2  11  -4    5.16    0.26
  -2 -11   4    5.36    0.27
  -2 -11   4    5.02    0.27
   2  11  -5    1.07    0.16
   2  11  -5    1.03    0.16
   2  11  -5    1.00    0.15
   2  11  -6    0.12    0.10
   2  11  -6    0.13    0.10
   2  11  -6    0.27    0.12
  -2 -11   6    0.19    0.10
   2  11  -7    1.83    0.24
   3  11   6    0.12    0.13
   3  11   6   -0.08    0.12
   3  11   5    0.00    0.11
   3  11   5    0.11    0.11
  -3 -11  -5   -0.04    0.10
   3  11   4    0.03    0.10
   3  11   4    0.05    0.10
  -3 -11  -4   -0.03    0.09
   3  11   3    1.38    0.19
   3  11   3    1.12    0.18
  -3 -11  -3    1.08    0.18
   3  11   2    0.29    0.11
   3  11   2   -0.03    0.09
  -3 -11  -2    0.22    0.10
   3  11   1    9.54    0.39
   3  11   1    9.19    0.37
   3  11   1    9.78    0.39
  -3 -11  -1    9.79    0.33
  -3 -11  -1    9.52    0.32
   3  11   0    4.29    0.24
   3  11   0    4.70    0.24
   3  11   0    4.92    0.25
  -3 -11   0    4.45    0.22
  -3 -11   0    4.61    0.22
   3  11  -1    9.18    0.33
   3  11  -1    9.06    0.35
   3  11  -1    9.30    0.34
  -3 -11   1    9.04    0.34
  -3 -11   1    8.97    0.34
   3  11  -2    2.47    0.17
   3  11  -2    2.58    0.18
   3  11  -2    2.17    0.16
  -3 -11   2    2.99    0.20
  -3 -11   2    2.78    0.19
   3  11  -3   32.39    0.87
  -3 -11   3   32.25    0.88
  -3 -11   3   33.28    0.88
   3  11  -4    0.94    0.14
   3  11  -4    1.13    0.16
   3  11  -4    1.44    0.16
  -3 -11   4    1.22    0.16
  -3 -11   4    0.94    0.15
   3  11  -5    3.07    0.22
   3  11  -5    2.89    0.23
   3  11  -5    3.00    0.24
  -3 -11   5    2.92    0.23
  -3 -11   5    3.76    0.26
   3  11  -6    1.69    0.22
  -3 -11   6    1.65    0.21
  -3 -11   6    1.86    0.22
   3  11  -7    0.61    0.16
   3  11  -8    0.07    0.13
   4  11   5    1.34    0.23
   4  11   5    1.60    0.25
  -4 -11  -5    1.51    0.25
   4  11   4    2.62    0.29
   4  11   4    3.07    0.31
  -4 -11  -4    1.88    0.25
   4  11   3    7.20    0.39
   4  11   3    7.87    0.41
  -4 -11  -3    7.90    0.42
   4  11   2    1.30    0.19
   4  11   2    1.35    0.19
  -4 -11  -2    1.33    0.19
   4  11   1    0.62    0.14
   4  11   1    0.61    0.13
   4  11   1    0.77    0.15
  -4 -11  -1    0.60    0.11
  -4 -11  -1    0.44    0.10
   4  11   0    0.26    0.10
   4  11   0    0.10    0.08
   4  11   0    0.21    0.10
  -4 -11   0    0.25    0.08
  -4 -11   0    0.33    0.10
   4  11  -1   11.55    0.44
   4  11  -1   10.51    0.39
   4  11  -1   11.55    0.42
  -4 -11   1   11.49    0.41
  -4 -11   1   10.54    0.40
   4  11  -2    0.67    0.12
   4  11  -2    0.61    0.12
   4  11  -2    0.59    0.12
  -4 -11   2    0.46    0.11
  -4 -11   2    0.41    0.11
   4  11  -3    8.65    0.37
   4  11  -3    8.35    0.32
   4  11  -3    7.92    0.33
  -4 -11   3    8.25    0.36
  -4 -11   3    8.20    0.36
   4  11  -4    1.22    0.15
   4  11  -4    1.02    0.16
   4  11  -4    1.01    0.14
  -4 -11   4    1.18    0.18
  -4 -11   4    1.56    0.20
   4  11  -5    5.57    0.32
   4  11  -5    5.74    0.29
  -4 -11   5    6.53    0.35
  -4 -11   5    6.25    0.34
   4  11  -6   -0.01    0.08
  -4 -11   6    0.05    0.10
  -4 -11   6    0.02    0.10
   4  11  -7    0.43    0.15
  -4 -11   7    0.81    0.18
  -4 -11   7    0.94    0.17
   4  11  -8    0.58    0.18
   5  11   5    0.06    0.14
   5  11   4    0.03    0.12
   5  11   4    0.02    0.11
  -5 -11  -4    0.01    0.10
   5  11   3    5.33    0.36
   5  11   3    4.75    0.35
  -5 -11  -3    5.48    0.37
   5  11   2    9.39    0.46
   5  11   2   10.36    0.48
  -5 -11  -2    9.76    0.48
   5  11   1   38.48    1.11
   5  11   1   37.62    1.07
   5  11   1   37.47    1.04
   5  11   0   -0.06    0.07
   5  11   0    0.02    0.09
   5  11   0    0.00    0.08
  -5 -11   0   -0.05    0.08
  -5 -11   0    0.08    0.08
   5  11  -1    3.38    0.25
   5  11  -1    3.19    0.24
   5  11  -1    3.77    0.24
  -5 -11   1    3.92    0.24
  -5 -11   1    3.62    0.24
   5  11  -2    0.94    0.14
   5  11  -2    0.93    0.16
   5  11  -2    1.17    0.15
  -5 -11   2    1.08    0.17
  -5 -11   2    1.02    0.15
   5  11  -3    0.31    0.11
   5  11  -3    0.27    0.11
   5  11  -3    0.53    0.12
  -5 -11   3    0.47    0.13
  -5 -11   3    0.36    0.13
   5  11  -4    0.35    0.12
   5  11  -4    0.41    0.11
   5  11  -4    0.31    0.10
  -5 -11   4    0.37    0.12
  -5 -11   4    0.43    0.13
   5  11  -5    2.49    0.26
  -5 -11   5    2.90    0.24
  -5 -11   5    2.63    0.27
   5  11  -6    1.72    0.23
  -5 -11   6    1.72    0.23
  -5 -11   6    1.72    0.24
   5  11  -7    0.95    0.19
  -5 -11   7    1.12    0.21
  -5 -11   7    0.97    0.20
   5  11  -8    0.04    0.11
   6  11   4    0.04    0.13
   6  11   3    0.07    0.12
   6  11   3    0.07    0.12
  -6 -11  -3    0.30    0.14
   6  11   2    0.15    0.13
   6  11   2    0.11    0.12
  -6 -11  -2    0.32    0.13
   6  11   1    2.52    0.27
   6  11   1    1.99    0.25
   6  11   1    2.26    0.27
   6  11   0    5.15    0.32
   6  11   0    5.06    0.34
   6  11   0    5.21    0.32
   6  11  -1   19.87    0.71
   6  11  -1   19.76    0.66
   6  11  -1   19.45    0.64
  -6 -11   1   18.99    0.63
  -6 -11   1   18.38    0.62
   6  11  -2    0.76    0.14
   6  11  -2    0.91    0.17
   6  11  -2    1.05    0.16
  -6 -11   2    1.15    0.17
  -6 -11   2    0.96    0.17
   6  11  -3    2.10    0.21
   6  11  -3    2.20    0.21
   6  11  -3    1.81    0.23
  -6 -11   3    2.28    0.25
  -6 -11   3    1.78    0.21
   6  11  -4    0.05    0.10
  -6 -11   4   -0.02    0.09
  -6 -11   4    0.04    0.09
   6  11  -5   -0.01    0.10
  -6 -11   5    0.13    0.12
  -6 -11   5   -0.03    0.09
   6  11  -6    0.13    0.11
  -6 -11   6    0.13    0.12
  -6 -11   6    0.09    0.11
   6  11  -7    0.43    0.15
  -6 -11   7    0.04    0.12
  -6 -11   7    0.12    0.12
  -6 -11   8    0.10    0.15
  -6 -11   8    0.45    0.17
   7  11   3    0.41    0.18
   7  11   2    0.18    0.14
   7  11   1    0.44    0.16
   7  11   1    0.44    0.16
   7  11   1    0.42    0.17
   7  11   0    0.40    0.14
   7  11   0    0.17    0.13
   7  11   0    0.25    0.13
   7  11  -1    4.16    0.29
   7  11  -1    4.05    0.32
   7  11  -1    3.90    0.29
  -7 -11   1    3.20    0.26
  -7 -11   1    4.65    0.30
   7  11  -2    2.03    0.25
   7  11  -2    2.13    0.24
   7  11  -2    2.03    0.23
  -7 -11   2    2.02    0.25
  -7 -11   2    1.79    0.22
   7  11  -3    5.71    0.31
   7  11  -3    6.04    0.38
  -7 -11   3    5.62    0.35
  -7 -11   3    5.67    0.35
   7  11  -4   -0.01    0.09
  -7 -11   4    0.12    0.11
   7  11  -5    0.06    0.12
  -7 -11   5    0.03    0.11
  -7 -11   5   -0.08    0.09
   7  11  -6    0.05    0.12
  -7 -11   6    0.17    0.14
  -7 -11   6    0.11    0.12
   7  11  -7   -0.04    0.10
  -7 -11   7    0.10    0.13
  -7 -11   7   -0.09    0.10
  -7 -11   8   -0.11    0.11
   8  11   1    0.17    0.14
   8  11   0    0.46    0.16
   8  11   0    0.12    0.12
   8  11   0    0.26    0.15
   8  11  -1    0.00    0.11
   8  11  -1    0.08    0.10
   8  11  -1    0.18    0.14
   8  11  -2    0.34    0.13
   8  11  -2    0.34    0.15
   8  11  -2    0.14    0.11
  -8 -11   2    0.17    0.13
  -8 -11   2    0.34    0.14
   8  11  -3    6.59    0.42
  -8 -11   3    6.13    0.39
  -8 -11   3    6.99    0.42
   8  11  -4    2.82    0.32
  -8 -11   4    2.65    0.30
   8  11  -5    5.52    0.39
  -8 -11   5    5.17    0.39
  -8 -11   6    0.08    0.14
  -8 -11   7   -0.08    0.11
   9  11  -1    0.29    0.15
  -9 -11   3    0.19    0.14
  -9 -11   3    0.25    0.15
  -9 -11   4    0.00    0.13
  -9 -11   5    2.06    0.31
  -9 -11   6    1.28    0.26
   9 -12  -5    0.05    0.13
   9 -12  -4    0.09    0.13
   9 -12  -3   -0.11    0.10
   9 -12  -2    0.22    0.15
   9 -12  -2   -0.03    0.12
   8 -12  -7    0.10    0.13
   8 -12  -6    1.86    0.29
   8 -12  -5    1.24    0.23
   8 -12  -5    1.39    0.24
   8 -12  -4    0.64    0.18
   8 -12  -4    0.35    0.14
   8 -12  -3   -0.02    0.11
   8 -12  -3   -0.02    0.11
   8 -12  -2    0.01    0.11
   8 -12  -2    0.00    0.11
   8 -12  -1    0.32    0.15
   8 -12  -1    0.85    0.19
   8 -12   1   -0.05    0.13
   7 -12  -7    0.47    0.17
   7 -12  -7    0.50    0.17
   7 -12  -7    0.29    0.16
   7 -12  -6    0.44    0.16
   7 -12  -6    0.45    0.16
   7 -12  -6    0.32    0.14
   7 -12  -5    0.97    0.20
   7 -12  -5    1.03    0.21
   7 -12  -4    2.43    0.28
   7 -12  -4    2.82    0.31
   7 -12  -3    0.55    0.16
   7 -12  -3    0.70    0.16
   7 -12  -2    0.49    0.14
   7 -12  -2    0.39    0.13
   7 -12  -1    0.69    0.15
   7 -12  -1    0.48    0.14
  -7  12   0    0.16    0.12
   7 -12   0    0.06    0.11
  -7  12  -1    0.17    0.12
   7 -12   1   -0.06    0.11
  -7  12  -2    2.63    0.32
   7 -12   2    2.45    0.31
   6 -12  -7    0.31    0.15
   6 -12  -7    0.17    0.12
   6 -12  -7    0.15    0.13
   6 -12  -6    1.65    0.24
   6 -12  -6    1.41    0.22
   6 -12  -6    1.52    0.22
   6 -12  -5    1.06    0.18
   6 -12  -5    1.62    0.24
   6 -12  -5    1.39    0.21
   6 -12  -4    3.44    0.27
   6 -12  -4    3.90    0.29
   6 -12  -3    0.23    0.13
   6 -12  -3    0.32    0.12
   6 -12  -2    1.18    0.19
   6 -12  -2    1.00    0.17
  -6  12   1    0.17    0.10
   6 -12  -1    0.11    0.10
   6 -12  -1    0.29    0.12
   6 -12  -1    0.56    0.15
  -6  12   0    0.26    0.12
   6 -12   0    0.05    0.06
   6 -12   0    0.01    0.10
   6 -12   0    0.04    0.06
  -6  12  -1    0.25    0.12
   6 -12   1    0.17    0.12
   6 -12   2    0.26    0.14
  -6  12  -3    0.43    0.17
   6 -12   3    0.44    0.17
   6 -12   4    0.52    0.21
   5 -12  -7    0.69    0.16
   5 -12  -7    0.54    0.17
   5 -12  -7    0.80    0.17
   5 -12  -6    1.23    0.19
   5 -12  -6    1.29    0.20
   5 -12  -6    1.43    0.22
   5 -12  -5   -0.02    0.07
   5 -12  -5   -0.05    0.08
   5 -12  -5    0.06    0.09
   5 -12  -4    1.50    0.20
   5 -12  -4    1.39    0.19
   5 -12  -4    1.51    0.18
   5 -12  -3   -0.04    0.08
   5 -12  -3    0.09    0.10
   5 -12  -3    0.12    0.08
   5 -12  -2    0.22    0.10
   5 -12  -2    0.01    0.08
  -5  12   1    0.04    0.08
   5 -12  -1    0.05    0.09
   5 -12  -1   -0.09    0.09
  -5  12   0    3.84    0.25
   5 -12   0    3.71    0.25
   5 -12   0    3.92    0.27
   5 -12   0    3.73    0.26
  -5  12  -1    0.04    0.09
   5 -12   1    0.11    0.09
   5 -12   1    0.07    0.10
   5 -12   1    0.22    0.10
  -5  12  -2    0.45    0.14
   5 -12   2    0.57    0.15
  -5  12  -3    1.83    0.26
   5 -12   3    2.23    0.28
  -5  12  -4    0.13    0.14
   5 -12   4   -0.16    0.11
   5 -12   5   -0.18    0.14
   4 -12  -7    0.04    0.12
   4 -12  -6    3.14    0.26
   4 -12  -6    3.76    0.26
   4 -12  -6    3.79    0.29
   4 -12  -5    0.87    0.16
   4 -12  -5    1.02    0.16
   4 -12  -5    0.85    0.15
   4 -12  -4    5.52    0.31
   4 -12  -4    6.18    0.31
   4 -12  -4    6.19    0.33
   4 -12  -3    0.66    0.14
   4 -12  -3    0.85    0.15
   4 -12  -3    0.68    0.11
  -4  12   2    1.32    0.13
  -4  12   2    1.43    0.13
   4 -12  -2    1.19    0.17
   4 -12  -2    1.13    0.17
   4 -12  -2    1.33    0.13
  -4  12   1    3.72    0.21
  -4  12   1    4.11    0.22
   4 -12  -1    3.84    0.25
   4 -12  -1    4.25    0.26
  -4  12   0    2.84    0.20
   4 -12   0    3.27    0.22
   4 -12   0    3.56    0.24
   4 -12   0    3.25    0.23
  -4  12  -1    6.13    0.32
   4 -12   1    6.53    0.32
   4 -12   1    6.36    0.32
   4 -12   1    7.09    0.33
  -4  12  -2    5.33    0.33
   4 -12   2    5.69    0.33
  -4  12  -3    0.06    0.10
   4 -12   3   -0.08    0.10
  -4  12  -4    0.15    0.13
   4 -12   4    0.36    0.16
   4 -12   5    0.00    0.14
   3 -12  -7    1.33    0.23
   3 -12  -6    0.57    0.16
   3 -12  -5    0.02    0.08
   3 -12  -5    0.11    0.09
   3 -12  -5    0.17    0.11
   3 -12  -4    4.35    0.26
   3 -12  -4    4.94    0.28
   3 -12  -4    4.93    0.27
  -3  12   3    0.58    0.08
   3 -12  -3    0.63    0.11
   3 -12  -3    0.62    0.13
   3 -12  -3    0.84    0.14
  -3  12   2    4.88    0.21
  -3  12   2    4.62    0.20
   3 -12  -2    5.31    0.26
   3 -12  -2    4.28    0.20
   3 -12  -2    4.04    0.25
  -3  12   1    2.70    0.17
  -3  12   1    2.70    0.17
   3 -12  -1    2.54    0.19
   3 -12  -1    2.74    0.12
   3 -12  -1    2.41    0.19
  -3  12   0    0.52    0.11
  -3  12   0    0.51    0.10
   3 -12   0    0.63    0.12
   3 -12   0    0.68    0.13
  -3  12  -1    0.31    0.10
   3 -12   1   -0.01    0.05
   3 -12   1    0.24    0.08
   3 -12   1    0.03    0.09
  -3  12  -2    0.99    0.17
   3 -12   2    0.79    0.13
   3 -12   2    1.27    0.15
   3 -12   2    0.92    0.16
  -3  12  -3   10.72    0.48
   3 -12   3   11.53    0.48
  -3  12  -4   -0.03    0.10
   3 -12   4   -0.13    0.10
  -3  12  -5    1.25    0.22
   3 -12   5    1.41    0.24
   3 -12   6    1.51    0.26
   2 -12  -7    0.13    0.13
   2 -12  -6    0.14    0.11
   2 -12  -5    2.42    0.19
   2 -12  -5    2.62    0.19
   2 -12  -5    2.86    0.24
   2 -12  -4    2.48    0.22
   2 -12  -4    2.97    0.22
   2 -12  -4    2.93    0.21
  -2  12   3    2.97    0.15
  -2  12   3    2.76    0.15
   2 -12  -3    2.44    0.21
   2 -12  -3    2.66    0.20
   2 -12  -3    2.87    0.19
  -2  12   2    3.56    0.17
  -2  12   2    3.30    0.17
   2 -12  -2    2.91    0.19
   2 -12  -2    3.40    0.17
   2 -12  -2    3.12    0.20
  -2  12   1    0.27    0.07
  -2  12   1    0.41    0.08
   2 -12  -1    0.28    0.08
   2 -12  -1    0.32    0.05
   2 -12  -1    0.24    0.09
  -2  12   0    0.76    0.12
  -2  12   0    1.15    0.13
   2 -12   0    0.82    0.12
   2 -12   0    1.03    0.13
  -2  12  -1    2.49    0.18
  -2  12  -1    2.72    0.18
   2 -12   1    2.40    0.17
   2 -12   1    2.33    0.17
  -2  12  -2    2.39    0.20
  -2  12  -2    2.79    0.21
   2 -12   2    2.34    0.17
   2 -12   2    2.57    0.19
  -2  12  -3   -0.11    0.08
   2 -12   3    0.02    0.09
   2 -12   3    0.17    0.08
   2 -12   3   -0.06    0.07
  -2  12  -4    2.56    0.26
   2 -12   4    2.32    0.25
  -2  12  -5    2.67    0.29
   2 -12   5    3.03    0.31
  -2  12  -6    0.09    0.14
  -2  12  -7    0.26    0.15
   1 -12  -7    1.30    0.24
   1 -12  -6    0.10    0.11
   1 -12  -5    1.41    0.21
  -1  12   4    1.69    0.15
  -1  12   4    1.71    0.16
   1 -12  -4    1.54    0.19
   1 -12  -4    2.08    0.16
   1 -12  -4    1.82    0.17
  -1  12   3    2.66    0.16
  -1  12   3    2.44    0.16
   1 -12  -3    2.32    0.17
   1 -12  -3    2.58    0.17
   1 -12  -3    2.87    0.20
  -1  12   2   15.95    0.43
  -1  12   2   15.39    0.44
   1 -12  -2   15.13    0.46
   1 -12  -2   16.08    0.48
   1 -12  -2   16.07    0.47
  -1  12   1   12.49    0.37
  -1  12   1   12.66    0.38
   1 -12  -1   11.80    0.39
   1 -12  -1   12.29    0.34
   1 -12  -1   12.45    0.40
  -1  12   0    6.27    0.26
  -1  12   0    6.42    0.25
   1 -12   0    6.17    0.27
   1 -12   0    6.47    0.17
  -1  12  -1   11.24    0.40
  -1  12  -1   12.06    0.39
   1 -12   1   11.72    0.39
   1 -12   1   12.00    0.39
  -1  12  -2    6.99    0.30
  -1  12  -2    7.03    0.20
  -1  12  -2    6.98    0.31
   1 -12   2    6.64    0.28
   1 -12   2    6.68    0.28
  -1  12  -3    0.67    0.14
  -1  12  -3    0.64    0.13
   1 -12   3    0.66    0.12
   1 -12   3    0.75    0.12
  -1  12  -4    7.02    0.36
  -1  12  -4    7.65    0.38
   1 -12   4    7.29    0.30
  -1  12  -5    2.30    0.26
  -1  12  -5    1.69    0.22
  -1  12  -6    4.06    0.33
  -1  12  -6    5.22    0.36
  -1  12  -7    3.76    0.37
  -1  12  -7    3.23    0.36
   0 -12  -7    0.87    0.21
   0 -12  -6    1.53    0.23
   0  12   5    0.47    0.11
   0  12   5    0.34    0.11
   0 -12  -5    0.34    0.13
   0  12   4    1.69    0.18
   0  12   4    1.62    0.17
   0 -12  -4    1.92    0.21
   0  12   3   10.83    0.37
   0  12   3   10.76    0.38
   0 -12  -3   10.60    0.35
   0 -12  -3   11.56    0.43
   0 -12  -3   10.83    0.35
   0  12   2    0.20    0.07
   0  12   2    0.08    0.07
   0 -12  -2    0.14    0.06
   0 -12  -2    0.11    0.06
   0 -12  -2    0.11    0.06
   0  12   1   17.72    0.48
   0  12   1   16.65    0.49
   0 -12  -1   17.95    0.48
   0 -12  -1   17.50    0.49
   0 -12  -1   17.78    0.50
   0  12   0   46.03    1.07
   0  12   0   46.30    1.04
   0 -12   0   45.36    1.07
   0 -12   0   45.63    1.08
   0  12  -1   17.16    0.51
   0  12  -1   17.41    0.42
   0  12  -1   17.42    0.49
   0 -12   1   17.33    0.51
   0 -12   1   17.77    0.51
   0  12  -2    0.04    0.04
   0  12  -2    0.21    0.08
   0  12  -2    0.21    0.08
   0 -12   2    0.16    0.07
   0 -12   2    0.12    0.07
   0  12  -4    1.94    0.21
   0  12  -4    1.90    0.16
   0  12  -4    1.69    0.19
   0 -12   4    1.72    0.18
   0 -12   4    1.77    0.18
   0  12  -5    0.50    0.13
   0  12  -5    0.52    0.13
   0  12  -6    1.54    0.22
   0  12  -6    1.64    0.23
   0  12  -7    0.54    0.17
   0  12  -7    0.83    0.19
  -1 -12  -6    5.03    0.37
   1  12   5    1.72    0.21
   1  12   5    2.37    0.24
  -1 -12  -5    1.77    0.23
   1  12   4    7.73    0.35
   1  12   4    7.78    0.36
  -1 -12  -4    8.17    0.40
   1  12   3    0.33    0.10
   1  12   3    0.60    0.12
  -1 -12  -3    0.60    0.08
  -1 -12  -3    0.67    0.13
   1  12   2    6.86    0.29
   1  12   2    7.08    0.29
  -1 -12  -2    6.83    0.26
  -1 -12  -2    7.05    0.26
  -1 -12  -2    6.72    0.30
   1  12   1   10.95    0.37
   1  12   1   11.39    0.38
  -1 -12  -1   11.40    0.37
  -1 -12  -1   11.77    0.38
  -1 -12  -1   11.50    0.36
   1  12   0    6.08    0.25
   1  12   0    6.04    0.26
   1  12   0    6.08    0.23
  -1 -12   0    5.70    0.25
  -1 -12   0    6.39    0.25
   1  12  -1   12.20    0.40
   1  12  -1   12.43    0.39
   1  12  -1   12.39    0.36
  -1 -12   1   11.80    0.40
  -1 -12   1   12.58    0.41
   1  12  -2   15.40    0.49
   1  12  -2   16.37    0.44
   1  12  -2   15.51    0.47
  -1 -12   2   15.21    0.48
  -1 -12   2   15.44    0.49
   1  12  -3    2.60    0.20
   1  12  -3    2.64    0.16
   1  12  -3    2.74    0.20
  -1 -12   3    2.58    0.18
  -1 -12   3    2.71    0.20
   1  12  -4    1.93    0.20
   1  12  -4    2.05    0.21
   1  12  -4    1.44    0.16
   1  12  -5    1.14    0.16
   1  12  -5    1.44    0.19
   1  12  -5    1.32    0.19
  -1 -12   5    1.41    0.18
  -1 -12   5    1.45    0.18
   1  12  -6    0.02    0.10
   1  12  -6    0.18    0.11
   1  12  -7    0.32    0.13
   2  12   6   -0.05    0.09
   2  12   6    0.14    0.12
  -2 -12  -6    0.08    0.12
   2  12   5    2.79    0.28
   2  12   5    3.29    0.26
  -2 -12  -5    2.47    0.28
   2  12   4    1.98    0.22
   2  12   4    1.93    0.21
  -2 -12  -4    2.30    0.25
   2  12   3    0.04    0.09
   2  12   3    0.02    0.08
  -2 -12  -3    0.00    0.08
   2  12   2    2.81    0.20
   2  12   2    2.20    0.18
  -2 -12  -2    2.34    0.15
  -2 -12  -2    1.84    0.19
  -2 -12  -2    2.37    0.15
   2  12   1    2.41    0.18
   2  12   1    1.98    0.16
   2  12   1    2.21    0.17
  -2 -12  -1    2.39    0.15
  -2 -12  -1    2.19    0.15
   2  12   0    0.97    0.12
   2  12   0    0.93    0.12
   2  12   0    1.02    0.13
  -2 -12   0    1.21    0.13
  -2 -12   0    1.03    0.12
   2  12  -1    0.13    0.06
   2  12  -1    0.29    0.08
   2  12  -1    0.13    0.07
  -2 -12   1    0.42    0.09
  -2 -12   1    0.29    0.08
   2  12  -2    3.09    0.19
   2  12  -2    3.38    0.20
   2  12  -2    2.84    0.17
  -2 -12   2    3.13    0.20
  -2 -12   2    3.06    0.19
   2  12  -3    2.77    0.18
   2  12  -3    2.26    0.19
   2  12  -3    2.47    0.19
  -2 -12   3    3.00    0.21
  -2 -12   3    3.00    0.21
   2  12  -4    2.55    0.22
   2  12  -4    2.75    0.21
   2  12  -4    2.84    0.20
  -2 -12   4    2.52    0.21
  -2 -12   4    2.87    0.22
   2  12  -5    2.66    0.21
  -2 -12   5    2.03    0.21
  -2 -12   5    1.92    0.21
   2  12  -6    0.10    0.10
   2  12  -6    0.05    0.10
   2  12  -6    0.08    0.10
  -2 -12   6    0.07    0.09
  -2 -12   6    0.22    0.11
   3  12   6    1.74    0.26
   3  12   6    1.65    0.26
   3  12   5    1.54    0.23
   3  12   5    1.24    0.21
  -3 -12  -5    0.96    0.21
   3  12   4   -0.10    0.09
   3  12   4   -0.12    0.08
  -3 -12  -4    0.13    0.11
   3  12   3   11.91    0.48
   3  12   3   10.51    0.46
  -3 -12  -3   10.99    0.48
   3  12   2    0.88    0.16
   3  12   2    0.98    0.16
  -3 -12  -2    0.79    0.15
   3  12   1    0.25    0.09
   3  12   1    0.17    0.09
   3  12   1    0.10    0.08
  -3 -12  -1    0.33    0.09
  -3 -12  -1    0.15    0.08
   3  12   0    0.43    0.10
   3  12   0    0.53    0.11
   3  12   0    0.65    0.11
  -3 -12   0    0.60    0.11
  -3 -12   0    0.73    0.11
   3  12  -1    2.37    0.18
   3  12  -1    2.52    0.18
   3  12  -1    2.86    0.19
  -3 -12   1    2.56    0.18
  -3 -12   1    2.64    0.18
   3  12  -2    3.79    0.22
   3  12  -2    4.45    0.24
   3  12  -2    4.39    0.23
  -3 -12   2    4.55    0.25
  -3 -12   2    3.91    0.23
   3  12  -3    0.51    0.11
   3  12  -3    0.47    0.11
   3  12  -3    0.71    0.12
  -3 -12   3    0.66    0.13
  -3 -12   3    0.61    0.12
   3  12  -4    4.26    0.26
   3  12  -4    4.07    0.23
   3  12  -4    4.13    0.25
  -3 -12   4    4.76    0.28
  -3 -12   4    4.18    0.27
   3  12  -5    0.00    0.09
   3  12  -5    0.11    0.09
   3  12  -5    0.07    0.10
  -3 -12   5    0.13    0.11
  -3 -12   5    0.25    0.11
   3  12  -6    0.32    0.12
  -3 -12   6    0.45    0.14
  -3 -12   6    0.42    0.13
   3  12  -7    1.07    0.19
   4  12   5    0.21    0.14
   4  12   5    0.05    0.12
   4  12   4    0.26    0.14
   4  12   4    0.29    0.13
  -4 -12  -4    0.08    0.10
   4  12   3   -0.01    0.09
   4  12   3   -0.02    0.09
  -4 -12  -3    0.04    0.09
   4  12   2    4.98    0.31
   4  12   2    4.84    0.32
  -4 -12  -2    5.12    0.32
   4  12   1    5.49    0.31
   4  12   1    5.99    0.33
   4  12   1    5.99    0.33
  -4 -12  -1    6.47    0.28
  -4 -12  -1    5.74    0.27
   4  12   0    2.81    0.21
   4  12   0    3.05    0.24
   4  12   0    3.30    0.23
  -4 -12   0    3.02    0.20
  -4 -12   0    3.02    0.20
   4  12  -1    3.72    0.24
   4  12  -1    4.22    0.26
   4  12  -1    3.77    0.23
  -4 -12   1    4.13    0.24
  -4 -12   1    3.81    0.23
   4  12  -2    1.16    0.15
   4  12  -2    1.17    0.16
   4  12  -2    1.31    0.16
  -4 -12   2    1.22    0.17
  -4 -12   2    1.28    0.17
   4  12  -3    0.67    0.13
  -4 -12   3    0.40    0.12
  -4 -12   3    0.68    0.14
   4  12  -4    5.64    0.31
   4  12  -4    6.17    0.29
   4  12  -4    5.99    0.29
  -4 -12   4    5.87    0.33
  -4 -12   4    6.61    0.34
   4  12  -5    0.88    0.16
   4  12  -5    0.85    0.15
   4  12  -5    1.16    0.15
  -4 -12   5    1.04    0.18
  -4 -12   5    0.74    0.16
   4  12  -6    3.57    0.27
  -4 -12   6    3.41    0.28
  -4 -12   6    3.49    0.28
   4  12  -7    0.11    0.12
  -4 -12   7    0.25    0.12
  -4 -12   7    0.12    0.12
   4  12  -8   -0.01    0.12
   5  12   4    0.18    0.13
   5  12   4   -0.10    0.10
  -5 -12  -4    0.06    0.11
   5  12   3    2.10    0.27
   5  12   3    1.80    0.26
  -5 -12  -3    1.94    0.26
   5  12   2    0.48    0.15
   5  12   2    0.54    0.16
  -5 -12  -2    0.22    0.12
   5  12   1    0.16    0.10
   5  12   1   -0.04    0.09
   5  12   1    0.20    0.11
   5  12   0    3.13    0.24
   5  12   0    3.84    0.27
   5  12   0    4.03    0.27
  -5 -12   0    3.00    0.21
  -5 -12   0    3.63    0.24
   5  12  -1    0.05    0.08
   5  12  -1   -0.02    0.09
   5  12  -1    0.00    0.09
  -5 -12   1   -0.16    0.08
  -5 -12   1    0.16    0.10
   5  12  -2    0.12    0.09
   5  12  -2   -0.08    0.07
   5  12  -2    0.09    0.09
  -5 -12   2    0.10    0.09
  -5 -12   2    0.06    0.09
   5  12  -3    0.01    0.08
   5  12  -3   -0.02    0.08
   5  12  -3    0.03    0.08
  -5 -12   3    0.01    0.09
  -5 -12   3    0.04    0.08
   5  12  -4    1.79    0.22
   5  12  -4    1.33    0.17
   5  12  -4    1.18    0.15
  -5 -12   4    1.40    0.19
  -5 -12   4    1.55    0.20
   5  12  -5    0.03    0.09
  -5 -12   5    0.12    0.10
  -5 -12   5    0.08    0.10
   5  12  -6    1.50    0.22
  -5 -12   6    1.67    0.23
  -5 -12   6    1.43    0.21
   5  12  -7    0.64    0.17
  -5 -12   7    0.78    0.19
  -5 -12   7    0.27    0.15
   5  12  -8    0.79    0.20
  -5 -12   8    0.94    0.21
   6  12   4    0.50    0.19
   6  12   3    0.07    0.11
  -6 -12  -3    0.28    0.14
   6  12   2    0.24    0.14
   6  12   2    0.36    0.14
  -6 -12  -2    0.20    0.12
   6  12   1    0.23    0.12
   6  12   1    0.31    0.13
   6  12   1    0.35    0.14
   6  12   0    0.38    0.13
   6  12   0    0.19    0.12
   6  12   0    0.41    0.14
   6  12  -1    0.32    0.11
   6  12  -1    0.31    0.11
   6  12  -1    0.33    0.13
  -6 -12   1    0.42    0.12
  -6 -12   1    0.28    0.12
   6  12  -2    1.11    0.17
   6  12  -2    0.87    0.15
   6  12  -2    1.09    0.18
  -6 -12   2    1.07    0.17
  -6 -12   2    0.94    0.16
   6  12  -3    0.11    0.09
   6  12  -3    0.39    0.11
   6  12  -3    0.30    0.12
  -6 -12   3    0.20    0.11
  -6 -12   3    0.61    0.15
   6  12  -4    3.45    0.27
  -6 -12   4    3.42    0.28
  -6 -12   4    3.12    0.30
   6  12  -5    1.81    0.24
  -6 -12   5    1.59    0.23
  -6 -12   5    1.81    0.23
   6  12  -6    1.56    0.24
  -6 -12   6    1.54    0.23
  -6 -12   6    1.57    0.24
   6  12  -7    0.11    0.12
  -6 -12   7    0.15    0.12
  -6 -12   7    0.15    0.14
  -6 -12   8   -0.10    0.13
   7  12   2    2.15    0.29
   7  12   1   -0.08    0.09
   7  12   1    0.07    0.11
   7  12   1    0.10    0.12
   7  12   0    0.14    0.12
   7  12   0    0.21    0.13
   7  12   0    0.00    0.10
   7  12  -1    0.60    0.15
   7  12  -1    0.37    0.14
   7  12  -1    0.44    0.14
  -7 -12   1    0.29    0.13
   7  12  -2    0.31    0.13
   7  12  -2    0.41    0.14
   7  12  -2    0.48    0.14
  -7 -12   2    0.36    0.14
  -7 -12   2    0.66    0.15
   7  12  -3    0.36    0.12
   7  12  -3    0.65    0.16
   7  12  -3    0.45    0.13
  -7 -12   3    0.72    0.16
  -7 -12   3    0.51    0.16
   7  12  -4    2.76    0.30
  -7 -12   4    2.95    0.31
  -7 -12   4    2.36    0.27
   7  12  -5    1.29    0.22
  -7 -12   5    1.09    0.21
  -7 -12   5    0.97    0.21
   7  12  -6    0.28    0.14
  -7 -12   6    0.79    0.20
  -7 -12   6    0.46    0.16
  -7 -12   7    0.26    0.14
   8  12   1    0.03    0.14
   8  12   0    1.89    0.27
   8  12   0    1.79    0.27
   8  12  -1    0.77    0.18
   8  12  -1    0.46    0.16
   8  12  -1    0.40    0.15
   8  12  -2   -0.03    0.10
   8  12  -2    0.09    0.11
   8  12  -2    0.03    0.11
  -8 -12   2    0.02    0.11
  -8 -12   2    0.03    0.11
   8  12  -3    0.28    0.14
  -8 -12   3   -0.01    0.11
  -8 -12   3   -0.05    0.11
   8  12  -4    0.32    0.15
  -8 -12   4    0.39    0.15
  -8 -12   4    0.59    0.19
   8  12  -5    1.54    0.25
  -8 -12   5    1.65    0.27
  -8 -12   5    1.84    0.27
  -8 -12   6    1.35    0.25
  -8 -12   7   -0.07    0.13
   9  12  -1   -0.11    0.12
  -9 -12   3    0.07    0.12
  -9 -12   3   -0.05    0.12
  -9 -12   4    0.35    0.17
  -9 -12   5   -0.19    0.13
   9 -13  -5    0.09    0.14
   9 -13  -4    0.15    0.15
   9 -13  -3    0.10    0.13
   9 -13  -2    0.00    0.12
   8 -13  -7   -0.01    0.14
   8 -13  -6    0.69    0.20
   8 -13  -5    0.26    0.15
   8 -13  -5   -0.04    0.12
   8 -13  -4    0.93    0.20
   8 -13  -4    0.76    0.18
   8 -13  -3    0.61    0.17
   8 -13  -3    0.84    0.19
   8 -13  -2    0.06    0.11
   8 -13  -2    0.17    0.13
   8 -13  -1    0.19    0.12
   8 -13  -1    0.36    0.16
   8 -13   1    0.08    0.14
   7 -13  -7    0.17    0.16
   7 -13  -7    0.33    0.15
   7 -13  -7    0.21    0.14
   7 -13  -6    1.20    0.21
   7 -13  -6    1.11    0.22
   7 -13  -5    2.08    0.26
   7 -13  -5    2.40    0.30
   7 -13  -4    0.65    0.18
   7 -13  -4    0.97    0.19
   7 -13  -3    0.96    0.18
   7 -13  -3    0.80    0.18
   7 -13  -2    0.97    0.19
   7 -13  -2    0.59    0.15
   7 -13  -1    0.16    0.11
   7 -13  -1    0.19    0.12
  -7  13   0   -0.06    0.09
   7 -13   0   -0.01    0.10
  -7  13  -1    1.45    0.24
   7 -13   1    0.60    0.18
   7 -13   2    0.50    0.19
   6 -13  -7    0.31    0.14
   6 -13  -7    0.05    0.12
   6 -13  -7    0.03    0.12
   6 -13  -6    0.00    0.10
   6 -13  -6   -0.12    0.09
   6 -13  -6   -0.07    0.10
   6 -13  -5    0.41    0.13
   6 -13  -5    0.29    0.14
   6 -13  -5    0.17    0.11
   6 -13  -4    2.54    0.27
   6 -13  -4    2.39    0.27
   6 -13  -3    6.19    0.37
   6 -13  -3    6.23    0.36
   6 -13  -2    0.31    0.13
   6 -13  -2    0.34    0.12
  -6  13   1    1.69    0.19
   6 -13  -1    1.92    0.23
   6 -13  -1    2.49    0.27
   6 -13  -1    1.86    0.20
  -6  13   0    0.21    0.11
   6 -13   0    0.33    0.12
   6 -13   0    0.28    0.12
   6 -13   0    0.22    0.11
  -6  13  -1    1.82    0.24
   6 -13   1    1.48    0.22
  -6  13  -2    0.03    0.11
   6 -13   2   -0.01    0.12
   6 -13   3    0.07    0.13
   5 -13  -7    0.17    0.13
   5 -13  -7    0.10    0.11
   5 -13  -7    0.00    0.11
   5 -13  -6   -0.07    0.10
   5 -13  -6   -0.03    0.10
   5 -13  -6    0.00    0.10
   5 -13  -5    1.71    0.22
   5 -13  -5    1.64    0.21
   5 -13  -4    0.03    0.08
   5 -13  -4   -0.13    0.08
   5 -13  -4   -0.06    0.09
   5 -13  -3    1.73    0.22
   5 -13  -3    1.85    0.23
   5 -13  -2    0.36    0.13
   5 -13  -2    0.09    0.10
  -5  13   1    6.42    0.30
  -5  13   1    6.68    0.31
   5 -13  -1    7.00    0.36
   5 -13  -1    6.70    0.36
  -5  13   0    0.50    0.12
   5 -13   0    0.85    0.16
   5 -13   0    0.52    0.13
   5 -13   0    0.31    0.12
  -5  13  -1    1.69    0.21
   5 -13   1    1.76    0.21
   5 -13   1    1.71    0.20
   5 -13   1    1.19    0.19
  -5  13  -2   -0.04    0.09
   5 -13   2    0.01    0.12
  -5  13  -3    2.85    0.32
   5 -13   3    3.18    0.33
   5 -13   4   -0.18    0.13
   4 -13  -7   -0.01    0.12
   4 -13  -6    0.58    0.15
   4 -13  -6    0.73    0.15
   4 -13  -6    0.77    0.16
   4 -13  -5    0.50    0.13
   4 -13  -5    0.58    0.14
   4 -13  -5    0.70    0.14
   4 -13  -4    0.13    0.10
   4 -13  -4    0.00    0.08
   4 -13  -4    0.00    0.09
   4 -13  -3    9.57    0.41
   4 -13  -3    9.53    0.36
   4 -13  -3    9.38    0.42
  -4  13   2    0.00    0.06
  -4  13   2    0.02    0.06
   4 -13  -2    0.00    0.05
   4 -13  -2    0.10    0.09
   4 -13  -2   -0.05    0.07
  -4  13   1   20.60    0.59
  -4  13   1   20.21    0.57
   4 -13  -1   20.91    0.66
   4 -13  -1   21.39    0.66
  -4  13   0    8.69    0.36
  -4  13   0    8.37    0.36
   4 -13   0    8.59    0.38
   4 -13   0    8.67    0.38
  -4  13  -1   19.08    0.63
   4 -13   1   18.01    0.59
   4 -13   1   19.71    0.61
   4 -13   1   18.25    0.59
  -4  13  -2    0.08    0.10
   4 -13   2   -0.02    0.08
  -4  13  -3    0.75    0.17
   4 -13   3    0.98    0.19
  -4  13  -4    0.03    0.10
   4 -13   4    0.09    0.13
   4 -13   5    0.31    0.18
   3 -13  -7    2.67    0.31
   3 -13  -6    0.04    0.10
   3 -13  -5    1.95    0.21
   3 -13  -5    1.83    0.22
   3 -13  -5    1.86    0.20
   3 -13  -4    0.50    0.13
   3 -13  -4    0.64    0.13
  -3  13   3    1.11    0.11
   3 -13  -3    1.10    0.14
   3 -13  -3    0.94    0.15
   3 -13  -3    1.13    0.16
  -3  13   2    0.60    0.10
  -3  13   2    0.70    0.10
   3 -13  -2    0.66    0.09
   3 -13  -2    0.64    0.13
   3 -13  -2    0.57    0.12
  -3  13   1   12.65    0.39
  -3  13   1   12.56    0.41
   3 -13  -1   12.52    0.45
   3 -13  -1   12.33    0.45
   3 -13  -1   12.91    0.33
  -3  13   0    3.07    0.20
  -3  13   0    3.01    0.19
   3 -13   0    2.76    0.21
   3 -13   0    3.16    0.21
  -3  13  -1   23.80    0.69
  -3  13  -1   23.80    0.71
   3 -13   1   24.30    0.70
   3 -13   1   24.90    0.70
  -3  13  -2   27.36    0.81
   3 -13   2   26.32    0.78
   3 -13   2   27.47    0.75
   3 -13   2   26.95    0.75
  -3  13  -3   26.04    0.83
   3 -13   3   25.82    0.80
  -3  13  -4    2.57    0.28
   3 -13   4    2.48    0.28
  -3  13  -5    0.75    0.19
   3 -13   5    0.57    0.18
   2 -13  -7    0.60    0.18
   2 -13  -6    0.02    0.10
   2 -13  -5    2.71    0.24
   2 -13  -5    2.61    0.20
   2 -13  -5    3.06    0.22
   2 -13  -4    0.36    0.11
   2 -13  -4    0.19    0.10
   2 -13  -4    0.45    0.11
  -2  13   3    5.61    0.21
  -2  13   3    5.51    0.22
   2 -13  -3    5.20    0.26
   2 -13  -3    5.46    0.27
   2 -13  -3    5.39    0.27
  -2  13   2    6.52    0.25
  -2  13   2    6.97    0.25
   2 -13  -2    6.69    0.25
   2 -13  -2    7.02    0.30
   2 -13  -2    6.18    0.29
  -2  13   1    0.96    0.11
  -2  13   1    0.63    0.10
   2 -13  -1    0.96    0.08
   2 -13  -1    0.67    0.11
   2 -13  -1    0.87    0.13
  -2  13   0    2.02    0.16
  -2  13   0    1.86    0.15
   2 -13   0    1.92    0.16
   2 -13   0    1.92    0.16
  -2  13  -1    1.05    0.14
  -2  13  -1    0.94    0.13
   2 -13   1    1.22    0.15
   2 -13   1    1.04    0.14
  -2  13  -2    5.70    0.31
  -2  13  -2    5.85    0.31
   2 -13   2    6.14    0.28
   2 -13   2    6.46    0.29
  -2  13  -3    2.94    0.27
  -2  13  -3    2.91    0.24
   2 -13   3    2.99    0.21
   2 -13   3    3.11    0.21
  -2  13  -4    8.75    0.44
  -2  13  -5    5.41    0.36
  -2  13  -6    0.72    0.19
  -2  13  -6    0.59    0.18
  -2  13  -7    0.18    0.15
   1 -13  -7    2.01    0.29
   1 -13  -6    0.72    0.18
   1 -13  -5    0.08    0.10
  -1  13   4    0.14    0.07
  -1  13   4    0.10    0.07
   1 -13  -4    0.03    0.09
   1 -13  -4    0.08    0.08
   1 -13  -4    0.15    0.08
  -1  13   3    3.46    0.19
  -1  13   3    4.04    0.19
   1 -13  -3    3.66    0.21
   1 -13  -3    3.70    0.22
   1 -13  -3    3.68    0.22
  -1  13   2    5.31    0.23
  -1  13   2    5.44    0.22
   1 -13  -2    5.46    0.23
   1 -13  -2    5.45    0.25
   1 -13  -2    5.16    0.25
  -1  13   1    3.27    0.18
  -1  13   1    3.22    0.18
   1 -13  -1    3.25    0.15
   1 -13  -1    3.11    0.19
   1 -13  -1    3.05    0.19
  -1  13   0    2.20    0.17
  -1  13   0    2.21    0.16
   1 -13   0    2.11    0.08
   1 -13   0    2.30    0.16
   1 -13   0    2.26    0.16
  -1  13  -1    0.69    0.11
  -1  13  -1    0.47    0.11
   1 -13   1    0.62    0.11
   1 -13   1    0.63    0.10
  -1  13  -2    5.22    0.27
  -1  13  -2    5.48    0.27
   1 -13   2    4.95    0.25
   1 -13   2    5.73    0.27
  -1  13  -3    0.65    0.14
  -1  13  -3    0.52    0.13
   1 -13   3    0.49    0.11
   1 -13   3    0.61    0.12
  -1  13  -4    0.36    0.13
  -1  13  -4    0.41    0.13
   1 -13   4    0.52    0.11
  -1  13  -5    0.86    0.18
  -1  13  -5    1.16    0.20
  -1  13  -6    3.39    0.34
  -1  13  -6    3.27    0.32
  -1  13  -7    1.17    0.22
  -1  13  -7    0.98    0.21
   0 -13  -7    0.06    0.13
   0 -13  -6    2.01    0.27
   0  13   5    1.71    0.18
   0  13   5    1.51    0.18
   0 -13  -5    1.58    0.21
   0  13   4    4.64    0.26
   0  13   4    5.40    0.27
   0 -13  -4    5.42    0.31
   0  13   3    0.24    0.08
   0  13   3    0.30    0.09
   0 -13  -3    0.20    0.08
   0 -13  -3    0.30    0.08
   0 -13  -3    0.18    0.09
   0  13   2    3.07    0.18
   0  13   2    3.02    0.18
   0 -13  -2    2.56    0.17
   0 -13  -2    3.19    0.18
   0 -13  -2    3.10    0.18
   0  13   1   18.53    0.52
   0  13   1   18.39    0.51
   0 -13  -1   18.44    0.52
   0 -13  -1   18.74    0.51
   0 -13  -1   17.91    0.53
   0  13   0    0.17    0.07
   0  13   0    0.04    0.06
   0 -13   0    0.08    0.06
   0 -13   0    0.13    0.07
   0  13  -1   17.96    0.52
   0  13  -1   17.97    0.44
   0  13  -1   18.23    0.53
   0 -13   1   17.05    0.52
   0  13  -2    3.00    0.13
   0  13  -2    2.83    0.20
   0  13  -2    3.30    0.21
   0 -13   2    3.50    0.21
   0 -13   2    3.14    0.21
   0  13  -3    0.12    0.09
   0  13  -3    0.18    0.06
   0  13  -3    0.02    0.08
   0 -13   3    0.08    0.08
   0 -13   3    0.17    0.08
   0  13  -4    5.18    0.31
   0  13  -4    5.49    0.30
   0 -13   4    5.01    0.27
   0 -13   4    4.80    0.28
   0  13  -5    1.63    0.21
   0  13  -5    1.40    0.20
   0  13  -6    2.22    0.27
   0  13  -6    1.77    0.24
   0  13  -7    0.33    0.15
   0  13  -7    0.11    0.13
  -1 -13  -6    3.63    0.36
   1  13   5    0.91    0.16
   1  13   5    0.78    0.15
  -1 -13  -5    1.16    0.20
   1  13   4    0.38    0.12
   1  13   4    0.34    0.12
  -1 -13  -4    0.22    0.12
   1  13   3    0.46    0.11
   1  13   3    0.47    0.11
  -1 -13  -3    0.39    0.11
  -1 -13  -3    0.20    0.07
   1  13   2    5.03    0.25
   1  13   2    5.30    0.25
  -1 -13  -2    5.27    0.23
  -1 -13  -2    5.19    0.26
  -1 -13  -2    5.21    0.24
   1  13   1    0.57    0.10
   1  13   1    0.37    0.10
  -1 -13  -1    0.60    0.10
  -1 -13  -1    0.49    0.10
  -1 -13  -1    0.63    0.10
   1  13   0    1.96    0.16
   1  13   0    2.11    0.15
   1  13   0    2.25    0.14
  -1 -13   0    1.97    0.15
  -1 -13   0    2.33    0.17
   1  13  -1    2.89    0.15
   1  13  -1    3.19    0.19
   1  13  -1    2.85    0.18
  -1 -13   1    3.14    0.19
  -1 -13   1    2.75    0.19
   1  13  -2    5.18    0.26
   1  13  -2    5.59    0.27
   1  13  -2    5.61    0.21
  -1 -13   2    5.15    0.27
  -1 -13   2    5.38    0.26
   1  13  -3    3.55    0.18
   1  13  -3    3.56    0.23
   1  13  -3    3.30    0.22
  -1 -13   3    3.70    0.24
  -1 -13   3    3.49    0.23
   1  13  -4    0.06    0.07
   1  13  -4   -0.10    0.08
   1  13  -4    0.02    0.10
  -1 -13   4    0.00    0.08
  -1 -13   4   -0.02    0.08
   1  13  -5    0.06    0.09
   1  13  -5    0.01    0.08
   1  13  -5    0.24    0.11
  -1 -13   5   -0.06    0.08
  -1 -13   5    0.23    0.11
   1  13  -6    0.48    0.15
   1  13  -6    0.64    0.16
   1  13  -7    1.98    0.26
   2  13   6    0.35    0.14
   2  13   6    0.82    0.17
  -2 -13  -6    0.31    0.16
   2  13   5    5.26    0.33
   2  13   5    4.99    0.32
  -2 -13  -5    5.13    0.36
   2  13   4    8.28    0.39
   2  13   4    8.29    0.40
  -2 -13  -4    7.85    0.42
   2  13   3    2.59    0.22
   2  13   3    2.81    0.24
  -2 -13  -3    2.98    0.24
   2  13   2    5.83    0.31
   2  13   2    6.59    0.31
  -2 -13  -2    6.24    0.25
  -2 -13  -2    6.21    0.31
  -2 -13  -2    6.12    0.25
   2  13   1    1.01    0.14
   2  13   1    1.02    0.13
   2  13   1    0.98    0.14
  -2 -13  -1    1.12    0.13
  -2 -13  -1    1.20    0.13
   2  13   0    2.03    0.17
   2  13   0    2.20    0.16
   2  13   0    1.52    0.16
  -2 -13   0    1.75    0.17
  -2 -13   0    1.97    0.15
   2  13  -1    0.78    0.12
   2  13  -1    0.69    0.10
   2  13  -1    1.00    0.13
  -2 -13   1    0.83    0.12
  -2 -13   1    0.86    0.13
   2  13  -2    6.32    0.28
   2  13  -2    6.72    0.29
   2  13  -2    6.58    0.27
  -2 -13   2    6.22    0.30
  -2 -13   2    6.38    0.29
   2  13  -3    5.64    0.28
   2  13  -3    5.45    0.25
   2  13  -3    5.11    0.27
  -2 -13   3    5.28    0.28
  -2 -13   3    5.93    0.30
   2  13  -4    0.29    0.12
   2  13  -4    0.30    0.12
   2  13  -4    0.21    0.09
  -2 -13   4    0.31    0.11
  -2 -13   4    0.29    0.11
   2  13  -5    2.72    0.23
   2  13  -5    2.85    0.23
   2  13  -5    2.88    0.22
  -2 -13   5    2.94    0.23
  -2 -13   5    2.97    0.24
   2  13  -6    0.11    0.10
   2  13  -6   -0.03    0.08
   2  13  -6    0.10    0.09
  -2 -13   6    0.18    0.11
  -2 -13   6    0.07    0.10
   3  13   6    0.04    0.12
   3  13   6    0.21    0.15
   3  13   5    0.75    0.18
   3  13   5    0.60    0.16
  -3 -13  -5    0.78    0.19
   3  13   4    2.55    0.27
   3  13   4    2.19    0.25
  -3 -13  -4    2.56    0.29
   3  13   3   25.13    0.78
   3  13   3   24.95    0.79
  -3 -13  -3   25.02    0.82
   3  13   2   24.88    0.75
   3  13   2   25.73    0.77
  -3 -13  -2   25.15    0.79
   3  13   1   24.35    0.73
   3  13   1   23.82    0.69
   3  13   1   22.29    0.69
  -3 -13  -1   23.83    0.65
  -3 -13  -1   22.56    0.63
   3  13   0    2.88    0.21
   3  13   0    3.11    0.22
   3  13   0    3.05    0.21
  -3 -13   0    2.70    0.19
  -3 -13   0    2.77    0.19
   3  13  -1   12.35    0.43
   3  13  -1   12.62    0.44
   3  13  -1   12.06    0.42
  -3 -13   1   12.07    0.42
  -3 -13   1   11.83    0.42
   3  13  -2    0.48    0.11
   3  13  -2    0.77    0.12
   3  13  -2    0.60    0.12
  -3 -13   2    0.62    0.12
  -3 -13   2    0.47    0.11
   3  13  -3    0.99    0.15
   3  13  -3    1.05    0.15
   3  13  -3    1.17    0.15
  -3 -13   3    0.92    0.15
  -3 -13   3    1.19    0.17
   3  13  -4    0.73    0.14
  -3 -13   4    0.49    0.13
  -3 -13   4    0.38    0.13
   3  13  -5    1.48    0.19
   3  13  -5    1.93    0.21
   3  13  -5    1.43    0.18
  -3 -13   5    1.71    0.21
  -3 -13   5    1.61    0.21
   3  13  -6    0.03    0.10
  -3 -13   6    0.11    0.11
  -3 -13   6    0.00    0.10
   3  13  -7    2.79    0.29
   4  13   5    0.71    0.19
   4  13   5    0.40    0.16
   4  13   4   -0.06    0.09
   4  13   4    0.02    0.11
  -4 -13  -4    0.16    0.11
   4  13   3    0.66    0.17
   4  13   3    0.84    0.17
  -4 -13  -3    0.87    0.18
   4  13   2    0.12    0.10
   4  13   2    0.10    0.10
  -4 -13  -2   -0.08    0.07
   4  13   1   18.93    0.66
   4  13   1   18.79    0.62
   4  13   1   17.96    0.63
  -4 -13  -1   18.60    0.56
  -4 -13  -1   18.97    0.55
   4  13   0    7.90    0.37
   4  13   0    8.80    0.38
   4  13   0    7.63    0.35
  -4 -13   0    8.23    0.34
  -4 -13   0    7.85    0.34
   4  13  -1   19.76    0.64
   4  13  -1   19.45    0.59
   4  13  -1   18.80    0.61
  -4 -13   1   19.60    0.61
  -4 -13   1   19.74    0.61
   4  13  -2    0.00    0.07
   4  13  -2   -0.11    0.07
   4  13  -2    0.03    0.08
  -4 -13   2    0.12    0.09
  -4 -13   2    0.10    0.09
   4  13  -3    9.49    0.37
   4  13  -3    9.30    0.40
   4  13  -3    9.48    0.38
  -4 -13   3    9.15    0.40
  -4 -13   3    9.13    0.40
   4  13  -4    0.02    0.09
   4  13  -4    0.08    0.09
   4  13  -4    0.02    0.08
  -4 -13   4    0.07    0.10
  -4 -13   4    0.01    0.09
   4  13  -5    0.36    0.12
   4  13  -5    0.68    0.14
   4  13  -5    0.53    0.12
  -4 -13   5    0.65    0.15
  -4 -13   5    0.60    0.16
   4  13  -6    0.68    0.15
  -4 -13   6    0.40    0.15
  -4 -13   6    0.52    0.15
   4  13  -7    0.08    0.11
  -4 -13   7   -0.12    0.09
  -4 -13   7    0.01    0.11
   4  13  -8    0.24    0.15
   5  13   4   -0.25    0.10
   5  13   4    0.14    0.13
   5  13   3    2.82    0.31
   5  13   3    3.08    0.32
  -5 -13  -3    2.69    0.31
   5  13   2    0.11    0.11
   5  13   2    0.11    0.11
  -5 -13  -2   -0.11    0.07
   5  13   1    1.40    0.21
   5  13   1    1.31    0.21
   5  13   1    1.55    0.21
   5  13   0    0.58    0.15
   5  13   0    0.81    0.16
   5  13   0    0.58    0.14
  -5 -13   0    0.40    0.12
  -5 -13   0    0.57    0.13
   5  13  -1    7.45    0.36
   5  13  -1    6.98    0.37
   5  13  -1    6.00    0.32
  -5 -13   1    6.97    0.34
  -5 -13   1    7.05    0.34
   5  13  -2    0.25    0.10
   5  13  -2    0.29    0.11
   5  13  -2    0.13    0.09
  -5 -13   2    0.29    0.12
  -5 -13   2    0.15    0.10
   5  13  -3    1.51    0.20
  -5 -13   3    1.26    0.19
  -5 -13   3    1.35    0.20
   5  13  -4    0.10    0.09
   5  13  -4   -0.01    0.08
   5  13  -4   -0.08    0.07
  -5 -13   4   -0.03    0.09
  -5 -13   4   -0.02    0.09
   5  13  -5    2.05    0.24
  -5 -13   5    1.66    0.23
  -5 -13   5    1.75    0.24
   5  13  -6   -0.03    0.08
  -5 -13   6    0.08    0.12
  -5 -13   6    0.03    0.11
   5  13  -7    0.02    0.10
  -5 -13   7    0.18    0.13
  -5 -13   7    0.06    0.12
   5  13  -8    0.17    0.15
  -5 -13   8    0.18    0.15
   6  13   3   -0.02    0.12
   6  13   2    0.05    0.11
   6  13   2   -0.01    0.10
  -6 -13  -2   -0.01    0.10
   6  13   1    2.04    0.26
   6  13   1    1.66    0.23
   6  13   1    2.27    0.28
   6  13   0    0.29    0.12
   6  13   0    0.23    0.11
   6  13   0    0.28    0.12
   6  13  -1    1.77    0.21
   6  13  -1    1.92    0.22
   6  13  -1    1.80    0.23
  -6 -13   1    1.93    0.22
  -6 -13   1    1.87    0.21
   6  13  -2    0.16    0.10
   6  13  -2    0.45    0.12
   6  13  -2    0.22    0.11
  -6 -13   2    0.30    0.11
  -6 -13   2    0.24    0.10
   6  13  -3    3.24    0.22
   6  13  -3    3.59    0.24
   6  13  -4    2.09    0.25
  -6 -13   4    2.13    0.26
  -6 -13   4    2.14    0.25
   6  13  -5    0.01    0.10
  -6 -13   5    0.22    0.13
  -6 -13   5    0.41    0.14
   6  13  -6    0.05    0.10
  -6 -13   6   -0.03    0.11
  -6 -13   6    0.04    0.12
   6  13  -7    0.21    0.14
  -6 -13   7    0.10    0.12
  -6 -13   7    0.40    0.16
  -6 -13   8    0.21    0.16
   7  13   2    0.66    0.19
   7  13   1    0.92    0.21
   7  13   1    0.69    0.18
   7  13   1    0.88    0.20
   7  13   0    0.14    0.12
   7  13   0    0.09    0.12
   7  13   0   -0.10    0.10
   7  13  -1    0.15    0.11
   7  13  -1    0.14    0.12
   7  13  -1    0.32    0.13
  -7 -13   1    0.04    0.11
   7  13  -2    0.95    0.17
   7  13  -2    1.01    0.18
   7  13  -2    0.69    0.17
  -7 -13   2    0.84    0.18
  -7 -13   2    0.63    0.15
   7  13  -3    0.78    0.18
   7  13  -3    0.77    0.16
   7  13  -3    0.89    0.17
  -7 -13   3    0.99    0.19
  -7 -13   3    0.80    0.17
   7  13  -4    0.91    0.19
  -7 -13   4    1.32    0.22
  -7 -13   4    1.07    0.19
   7  13  -5    2.01    0.27
  -7 -13   5    2.07    0.27
  -7 -13   5    2.33    0.29
   7  13  -6    1.21    0.22
  -7 -13   6    1.28    0.23
  -7 -13   6    1.48    0.24
  -7 -13   7    0.26    0.16
   8  13   1    0.03    0.12
   8  13   0    0.20    0.15
   8  13   0    0.04    0.13
   8  13  -1    0.37    0.15
   8  13  -1    0.19    0.14
   8  13  -1    0.07    0.13
   8  13  -2    0.17    0.13
   8  13  -2    0.24    0.14
   8  13  -2    0.11    0.13
  -8 -13   2    0.14    0.13
  -8 -13   2    0.42    0.14
   8  13  -3    0.75    0.20
  -8 -13   3    0.84    0.19
  -8 -13   3    0.81    0.19
   8  13  -4    0.95    0.21
  -8 -13   4    1.15    0.21
  -8 -13   4    0.74    0.19
   8  13  -5    0.27    0.14
  -8 -13   5    0.45    0.18
  -8 -13   5    0.28    0.15
  -8 -13   6    0.79    0.20
  -8 -13   7    0.22    0.16
   9  13  -1    0.14    0.15
  -9 -13   3    0.28    0.14
  -9 -13   3   -0.01    0.13
  -9 -13   4    0.18    0.16
  -9 -13   5    0.34    0.17
   9 -14  -5    0.08    0.15
   9 -14  -4   -0.05    0.12
   9 -14  -3    0.41    0.16
   9 -14  -2    0.39    0.16
   8 -14  -6    0.35    0.17
   8 -14  -5    0.04    0.12
   8 -14  -4    0.07    0.11
   8 -14  -4   -0.03    0.11
   8 -14  -3    0.29    0.15
   8 -14  -3    0.29    0.14
   8 -14  -2    0.47    0.16
   8 -14  -2    0.56    0.17
   8 -14  -1   -0.02    0.09
   8 -14  -1    0.08    0.13
   8 -14   1   -0.04    0.13
   7 -14  -7    0.05    0.13
   7 -14  -6    0.81    0.20
   7 -14  -6    0.86    0.19
   7 -14  -5    0.50    0.15
   7 -14  -5    0.70    0.19
   7 -14  -4    3.03    0.32
   7 -14  -4    2.64    0.30
   7 -14  -3    0.13    0.10
   7 -14  -3    0.12    0.12
   7 -14  -2    0.12    0.11
   7 -14  -2    0.07    0.10
   7 -14  -1   -0.10    0.09
   7 -14  -1    0.04    0.11
  -7  14   0    0.47    0.14
   7 -14   0    0.23    0.13
  -7  14  -1    0.33    0.14
   7 -14   1    0.49    0.16
   7 -14   2   -0.02    0.14
   6 -14  -7    0.20    0.13
   6 -14  -7    0.13    0.12
   6 -14  -7    0.09    0.13
   6 -14  -6   -0.04    0.09
   6 -14  -6    0.00    0.11
   6 -14  -6    0.00    0.10
   6 -14  -5    0.93    0.19
   6 -14  -5    0.76    0.17
   6 -14  -4    5.89    0.36
   6 -14  -4    6.56    0.39
   6 -14  -3   -0.07    0.09
   6 -14  -3    0.13    0.10
   6 -14  -2   14.91    0.58
   6 -14  -2   14.74    0.59
   6 -14  -1    1.07    0.19
   6 -14  -1    1.26    0.19
  -6  14   0    0.21    0.11
   6 -14   0    0.04    0.10
   6 -14   0   -0.02    0.10
   6 -14   0    0.11    0.10
  -6  14  -1    0.73    0.16
   6 -14   1    0.63    0.17
  -6  14  -2    0.08    0.11
   6 -14   2    0.00    0.12
   6 -14   3    1.15    0.23
   5 -14  -7   -0.01    0.11
   5 -14  -7    0.07    0.13
   5 -14  -6   -0.01    0.10
   5 -14  -6   -0.04    0.10
   5 -14  -6    0.04    0.10
   5 -14  -5    3.69    0.28
   5 -14  -5    3.21    0.25
   5 -14  -5    3.08    0.26
   5 -14  -4    2.73    0.22
   5 -14  -4    2.62    0.26
   5 -14  -4    3.08    0.27
   5 -14  -3    0.42    0.13
   5 -14  -3    0.25    0.12
   5 -14  -2    3.72    0.28
   5 -14  -2    3.53    0.28
  -5  14   1    0.93    0.14
  -5  14   1    0.89    0.14
   5 -14  -1    1.21    0.18
   5 -14  -1    0.86    0.17
  -5  14   0   17.26    0.60
   5 -14   0   18.56    0.63
   5 -14   0   18.54    0.62
  -5  14  -1    1.81    0.22
   5 -14   1    1.87    0.23
   5 -14   1    1.82    0.21
   5 -14   1    1.74    0.21
  -5  14  -2    0.10    0.11
   5 -14   2   -0.06    0.11
  -5  14  -3    0.19    0.12
   5 -14   3    0.14    0.14
   5 -14   4    0.12    0.15
   4 -14  -7    0.48    0.17
   4 -14  -6    0.49    0.14
   4 -14  -6    0.93    0.18
   4 -14  -6    0.51    0.14
   4 -14  -5    1.45    0.19
   4 -14  -5    1.30    0.18
   4 -14  -5    1.37    0.19
   4 -14  -4   -0.06    0.07
   4 -14  -4   -0.02    0.08
   4 -14  -4   -0.09    0.07
   4 -14  -3   11.71    0.47
   4 -14  -3   11.83    0.41
   4 -14  -3   11.36    0.47
  -4  14   2    1.22    0.14
  -4  14   2    1.00    0.13
   4 -14  -2    1.09    0.17
   4 -14  -2    1.21    0.18
  -4  14   1    0.24    0.09
  -4  14   1    0.03    0.08
   4 -14  -1    0.22    0.10
   4 -14  -1   -0.01    0.09
  -4  14   0    4.93    0.28
  -4  14   0    5.34    0.29
   4 -14   0    5.59    0.31
   4 -14   0    5.22    0.30
  -4  14  -1    0.41    0.13
   4 -14   1   -0.01    0.04
   4 -14   1   -0.02    0.03
  -4  14  -2    3.86    0.28
   4 -14   2    4.36    0.26
   4 -14   2    4.17    0.28
  -4  14  -3    0.77    0.17
   4 -14   3    0.71    0.17
  -4  14  -4    0.47    0.16
   4 -14   4    0.09    0.13
   4 -14   5    0.01    0.14
   3 -14  -7    1.08    0.21
   3 -14  -6    1.94    0.25
   3 -14  -5    0.22    0.11
   3 -14  -5    0.15    0.11
   3 -14  -5    0.05    0.09
   3 -14  -4   -0.06    0.09
   3 -14  -4    0.06    0.09
   3 -14  -4    0.06    0.08
   3 -14  -3    7.67    0.36
   3 -14  -3    7.77    0.32
   3 -14  -3    7.59    0.37
  -3  14   2   10.10    0.34
  -3  14   2   11.05    0.36
   3 -14  -2   10.51    0.43
   3 -14  -2   10.73    0.34
   3 -14  -2   10.37    0.42
  -3  14   1    7.28    0.30
  -3  14   1    8.20    0.31
   3 -14  -1    7.75    0.34
   3 -14  -1    8.27    0.36
  -3  14   0    1.50    0.16
  -3  14   0    1.45    0.16
   3 -14   0    1.40    0.17
   3 -14   0    1.65    0.19
  -3  14  -1    7.05    0.33
  -3  14  -1    6.61    0.33
   3 -14   1    7.23    0.33
   3 -14   1    7.46    0.33
  -3  14  -2   19.56    0.64
  -3  14  -2   19.19    0.65
   3 -14   2   19.58    0.61
   3 -14   2   18.63    0.59
  -3  14  -3    1.73    0.22
  -3  14  -4    1.25    0.21
   3 -14   4    1.56    0.23
  -3  14  -5    0.93    0.21
  -3  14  -6    0.15    0.15
   2 -14  -7    0.41    0.16
   2 -14  -6    0.33    0.14
   2 -14  -5    5.69    0.29
   2 -14  -5    6.05    0.35
   2 -14  -5    5.86    0.30
   2 -14  -4    5.65    0.30
   2 -14  -4    6.29    0.31
   2 -14  -4    5.35    0.28
  -2  14   3    2.57    0.16
  -2  14   3    2.68    0.16
   2 -14  -3    2.98    0.21
   2 -14  -3    3.11    0.20
   2 -14  -3    3.08    0.22
  -2  14   2    0.98    0.12
  -2  14   2    1.29    0.13
   2 -14  -2    1.05    0.14
   2 -14  -2    1.12    0.15
   2 -14  -2    1.12    0.12
  -2  14   1   13.68    0.42
  -2  14   1   13.65    0.44
   2 -14  -1   14.39    0.37
   2 -14  -1   14.54    0.47
   2 -14  -1   14.87    0.48
  -2  14   0   34.98    0.84
  -2  14   0   34.34    0.88
   2 -14   0   33.78    0.90
   2 -14   0   33.93    0.89
  -2  14  -1    3.84    0.24
  -2  14  -1    3.47    0.22
   2 -14   1    4.18    0.24
   2 -14   1    3.70    0.23
  -2  14  -3   11.21    0.49
  -2  14  -3   12.57    0.49
   2 -14   3   11.79    0.43
   2 -14   3   12.29    0.43
  -2  14  -4    3.40    0.28
  -2  14  -4    3.41    0.27
  -2  14  -5    2.89    0.31
  -2  14  -5    2.88    0.31
  -2  14  -6    1.10    0.23
  -2  14  -6    1.21    0.22
   1 -14  -7    0.28    0.16
   1 -14  -6    0.08    0.11
   1 -14  -5    0.24    0.12
  -1  14   4    2.02    0.15
  -1  14   4    2.09    0.17
   1 -14  -4    1.71    0.18
   1 -14  -4    1.33    0.19
   1 -14  -4    1.56    0.18
  -1  14   3    4.17    0.22
  -1  14   3    3.80    0.20
   1 -14  -3    4.03    0.23
   1 -14  -3    3.83    0.23
   1 -14  -3    3.97    0.23
  -1  14   2   20.20    0.56
  -1  14   2   20.11    0.54
   1 -14  -2   20.27    0.57
   1 -14  -2   20.49    0.60
   1 -14  -2   20.01    0.58
  -1  14   1    2.88    0.18
  -1  14   1    3.39    0.19
   1 -14  -1    3.31    0.15
   1 -14  -1    2.97    0.19
   1 -14  -1    2.84    0.19
  -1  14   0    3.73    0.20
  -1  14   0    4.01    0.22
   1 -14   0    3.88    0.12
   1 -14   0    3.55    0.21
   1 -14   0    4.04    0.22
  -1  14  -1    2.80    0.20
  -1  14  -1    2.93    0.20
   1 -14   1    2.87    0.19
   1 -14   1    3.08    0.20
  -1  14  -2    6.41    0.31
  -1  14  -2    6.57    0.31
   1 -14   2    6.62    0.30
   1 -14   2    7.08    0.30
  -1  14  -3    1.85    0.20
  -1  14  -3    1.82    0.21
   1 -14   3    2.17    0.20
   1 -14   3    2.01    0.19
  -1  14  -4   15.48    0.58
  -1  14  -4   15.37    0.57
   1 -14   4   15.26    0.50
   1 -14   4   14.97    0.51
  -1  14  -5    1.66    0.23
  -1  14  -5    1.71    0.23
  -1  14  -6    1.67    0.24
  -1  14  -6    1.53    0.24
  -1  14  -7   -0.19    0.12
   0 -14  -7    0.61    0.19
   0 -14  -6    1.12    0.21
   0 -14  -5    0.04    0.09
   0  14   4    0.27    0.10
   0  14   4    0.22    0.11
   0 -14  -4    0.27    0.12
   0  14   3    0.03    0.08
   0  14   3    0.00    0.07
   0 -14  -3    0.09    0.07
   0 -14  -3    0.04    0.06
   0 -14  -3    0.03    0.08
   0  14   2    1.44    0.15
   0  14   2    1.75    0.17
   0 -14  -2    1.78    0.15
   0 -14  -2    1.79    0.15
   0  14   1    1.28    0.14
   0  14   1    1.37    0.14
   0 -14  -1    1.31    0.14
   0 -14  -1    1.50    0.12
   0 -14  -1    1.32    0.14
   0  14   0   40.68    0.95
   0  14   0   38.41    0.97
   0 -14   0   39.76    0.98
   0 -14   0   39.48    0.99
   0 -14   0   41.54    0.92
   0  14  -1    1.56    0.16
   0  14  -1    1.17    0.14
   0  14  -1    1.31    0.09
   0 -14   1    1.75    0.17
   0 -14   1    1.47    0.15
   0  14  -2    1.91    0.19
   0  14  -2    1.80    0.10
   0  14  -2    1.78    0.18
   0 -14   2    1.45    0.16
   0 -14   2    1.46    0.17
   0  14  -3    0.31    0.11
   0  14  -3    0.09    0.05
   0  14  -3   -0.01    0.08
   0 -14   3   -0.02    0.08
   0 -14   3    0.15    0.10
   0  14  -4    0.39    0.13
   0  14  -4    0.14    0.11
   0 -14   4    0.42    0.12
   0 -14   4    0.48    0.12
   0  14  -5    0.27    0.12
   0  14  -5    0.07    0.11
   0  14  -6    1.34    0.21
   0  14  -6    1.55    0.23
   0  14  -7    0.84    0.20
   0  14  -7    0.68    0.18
  -1 -14  -6    1.25    0.23
   1  14   5    1.42    0.19
   1  14   5    1.45    0.20
  -1 -14  -5    1.28    0.21
   1  14   4   14.34    0.52
   1  14   4   14.15    0.51
  -1 -14  -4   14.70    0.57
   1  14   3    1.87    0.18
   1  14   3    1.80    0.19
  -1 -14  -3    1.35    0.14
  -1 -14  -3    1.72    0.20
   1  14   2    6.31    0.29
   1  14   2    6.07    0.29
  -1 -14  -2    6.88    0.27
  -1 -14  -2    6.77    0.28
  -1 -14  -2    6.96    0.31
   1  14   1    2.40    0.18
   1  14   1    2.79    0.18
  -1 -14  -1    2.49    0.17
  -1 -14  -1    2.28    0.17
   1  14   0    4.08    0.22
   1  14   0    3.88    0.21
   1  14   0    3.78    0.19
  -1 -14   0    3.65    0.22
  -1 -14   0    3.64    0.21
   1  14  -1    3.00    0.19
   1  14  -1    2.91    0.16
   1  14  -1    3.03    0.19
  -1 -14   1    2.98    0.19
  -1 -14   1    3.05    0.19
   1  14  -2   19.80    0.58
   1  14  -2   20.45    0.53
   1  14  -2   19.72    0.60
  -1 -14   2   20.16    0.61
  -1 -14   2   19.47    0.60
   1  14  -3    4.54    0.21
   1  14  -3    3.55    0.25
   1  14  -3    4.24    0.25
  -1 -14   3    4.79    0.27
  -1 -14   3    4.17    0.26
   1  14  -4    1.83    0.20
   1  14  -4    1.62    0.19
   1  14  -4    1.74    0.15
  -1 -14   4    1.56    0.20
  -1 -14   4    1.68    0.19
   1  14  -5    0.27    0.12
   1  14  -5    0.37    0.13
  -1 -14   5    0.25    0.11
  -1 -14   5    0.31    0.11
   1  14  -6    0.16    0.12
   1  14  -6    0.22    0.13
   1  14  -7    0.61    0.17
   1  14  -7    0.38    0.15
   2  14   6    0.89    0.19
  -2 -14  -6    1.31    0.25
   2  14   5    2.42    0.27
   2  14   5    2.00    0.24
  -2 -14  -5    2.72    0.30
   2  14   4    3.80    0.27
   2  14   4    3.10    0.25
  -2 -14  -4    3.65    0.29
   2  14   3   11.09    0.45
   2  14   3   12.06    0.47
  -2 -14  -3   11.31    0.48
   2  14   2   21.01    0.65
   2  14   2   20.40    0.62
  -2 -14  -2   20.93    0.57
  -2 -14  -2   20.44    0.66
  -2 -14  -2   20.25    0.56
   2  14   1    3.80    0.24
   2  14   1    3.79    0.23
  -2 -14  -1    3.96    0.22
  -2 -14  -1    3.74    0.21
   2  14   0   34.97    0.87
   2  14   0   34.23    0.88
   2  14   0   33.24    0.88
  -2 -14   0   33.46    0.87
  -2 -14   0   33.63    0.87
   2  14  -1   13.71    0.46
   2  14  -1   14.03    0.45
   2  14  -1   13.47    0.43
  -2 -14   1   14.17    0.47
  -2 -14   1   13.05    0.45
   2  14  -2    1.25    0.13
   2  14  -2    1.03    0.14
   2  14  -2    1.15    0.15
  -2 -14   2    1.17    0.15
  -2 -14   2    1.20    0.16
   2  14  -3    2.77    0.18
   2  14  -3    2.78    0.22
   2  14  -3    2.63    0.21
  -2 -14   3    2.82    0.22
  -2 -14   3    2.74    0.22
   2  14  -4    5.05    0.26
   2  14  -4    5.51    0.30
   2  14  -4    5.70    0.30
  -2 -14   4    5.24    0.30
  -2 -14   4    4.60    0.29
   2  14  -5    6.02    0.33
   2  14  -5    5.95    0.32
   2  14  -5    5.54    0.30
  -2 -14   5    6.10    0.33
  -2 -14   5    6.25    0.34
  -2 -14   6    0.95    0.16
  -2 -14   6    0.74    0.16
   3  14   6    0.27    0.15
   3  14   5    0.59    0.16
   3  14   5    0.69    0.17
  -3 -14  -5    0.51    0.17
   3  14   4    1.88    0.24
   3  14   4    1.87    0.24
  -3 -14  -4    1.82    0.25
   3  14   3    1.40    0.19
   3  14   3    1.65    0.22
  -3 -14  -3    1.56    0.21
   3  14   2   17.61    0.60
   3  14   2   18.45    0.63
  -3 -14  -2   18.45    0.64
   3  14   1    7.09    0.34
   3  14   1    6.92    0.32
   3  14   1    6.71    0.34
  -3 -14  -1    6.53    0.29
  -3 -14  -1    6.94    0.30
   3  14   0    1.42    0.17
   3  14   0    1.59    0.18
   3  14   0    1.52    0.17
  -3 -14   0    1.48    0.16
  -3 -14   0    1.87    0.18
   3  14  -1    7.81    0.34
   3  14  -1    7.69    0.33
   3  14  -1    7.36    0.32
  -3 -14   1    7.99    0.34
  -3 -14   1    7.71    0.33
   3  14  -2   10.57    0.39
   3  14  -2   10.38    0.40
   3  14  -2   10.01    0.39
  -3 -14   2   10.04    0.41
  -3 -14   2   10.24    0.41
   3  14  -3    7.62    0.33
   3  14  -3    7.10    0.33
   3  14  -3    7.39    0.32
  -3 -14   3    7.75    0.36
  -3 -14   3    7.73    0.36
   3  14  -4   -0.04    0.08
   3  14  -4    0.11    0.09
   3  14  -4    0.05    0.08
  -3 -14   4    0.11    0.10
  -3 -14   4   -0.19    0.09
   3  14  -5    0.44    0.12
   3  14  -5    0.14    0.10
   3  14  -5    0.22    0.11
  -3 -14   5    0.25    0.11
  -3 -14   5    0.39    0.13
   3  14  -6    2.03    0.23
   3  14  -6    1.45    0.20
  -3 -14   6    1.95    0.23
  -3 -14   6    1.46    0.21
   4  14   5    0.00    0.12
   4  14   4    0.33    0.14
   4  14   4    0.14    0.12
  -4 -14  -4    0.06    0.11
   4  14   3    1.00    0.19
   4  14   3    1.16    0.20
  -4 -14  -3    0.71    0.16
   4  14   2    3.77    0.28
   4  14   2    3.90    0.28
  -4 -14  -2    4.15    0.30
   4  14   1    0.38    0.13
   4  14   1    0.34    0.12
   4  14   1    0.21    0.11
  -4 -14  -1    0.39    0.10
  -4 -14  -1    0.58    0.12
   4  14   0    4.49    0.29
   4  14   0    5.05    0.30
   4  14   0    5.48    0.29
  -4 -14   0    5.39    0.27
  -4 -14   0    4.78    0.27
   4  14  -1    0.08    0.08
   4  14  -1    0.05    0.08
   4  14  -1    0.11    0.09
  -4 -14   1    0.07    0.09
  -4 -14   1   -0.12    0.08
   4  14  -2    1.04    0.15
   4  14  -2    0.99    0.15
   4  14  -2    1.11    0.16
  -4 -14   2    1.05    0.17
  -4 -14   2    1.51    0.19
   4  14  -3   11.21    0.45
   4  14  -3   10.99    0.41
   4  14  -3   11.00    0.43
  -4 -14   3   10.58    0.45
  -4 -14   3   10.20    0.44
   4  14  -4    0.06    0.08
   4  14  -4    0.10    0.09
   4  14  -4    0.08    0.09
  -4 -14   4   -0.06    0.09
  -4 -14   4    0.00    0.09
   4  14  -5    1.36    0.18
   4  14  -5    1.26    0.17
   4  14  -5    1.12    0.18
  -4 -14   5    1.43    0.20
  -4 -14   5    1.32    0.20
   4  14  -6    0.72    0.16
  -4 -14   6    0.90    0.17
  -4 -14   6    0.72    0.17
   4  14  -7    0.25    0.13
  -4 -14   7    0.06    0.12
  -4 -14   7    0.25    0.14
   5  14   4    0.19    0.14
   5  14   3    0.13    0.12
   5  14   3   -0.05    0.11
  -5 -14  -3    0.16    0.12
   5  14   2    0.13    0.11
   5  14   2   -0.03    0.10
  -5 -14  -2    0.05    0.09
   5  14   1    1.85    0.23
   5  14   1    1.81    0.24
   5  14   1    1.57    0.21
   5  14   0   17.14    0.63
   5  14   0   16.55    0.60
   5  14   0   16.52    0.59
  -5 -14   0   16.82    0.55
  -5 -14   0   15.97    0.54
   5  14  -1    0.83    0.15
   5  14  -1    0.90    0.16
   5  14  -1    0.73    0.15
  -5 -14   1    0.80    0.15
  -5 -14   1    0.73    0.14
   5  14  -2    3.63    0.24
   5  14  -2    3.87    0.27
   5  14  -2    3.92    0.26
  -5 -14   2    3.31    0.25
  -5 -14   2    2.86    0.25
   5  14  -3    0.10    0.09
   5  14  -3    0.16    0.10
   5  14  -3    0.17    0.09
  -5 -14   3   -0.03    0.09
  -5 -14   3    0.04    0.11
   5  14  -4    2.97    0.23
   5  14  -4    2.64    0.21
   5  14  -4    3.25    0.26
  -5 -14   4    3.27    0.26
  -5 -14   4    3.19    0.26
   5  14  -5    3.38    0.27
  -5 -14   5    3.31    0.27
  -5 -14   5    3.35    0.28
   5  14  -6   -0.02    0.10
  -5 -14   6    0.08    0.12
  -5 -14   6   -0.08    0.11
   5  14  -7    0.05    0.11
  -5 -14   7    0.40    0.15
  -5 -14   7    0.23    0.15
  -5 -14   8    0.26    0.16
   6  14   3    0.83    0.22
   6  14   2    0.00    0.11
   6  14   2   -0.01    0.11
  -6 -14  -2   -0.03    0.09
   6  14   1    0.83    0.18
   6  14   1    0.56    0.17
   6  14   1    0.55    0.16
   6  14   0    0.04    0.10
   6  14   0   -0.07    0.08
   6  14   0    0.12    0.11
   6  14  -1    1.11    0.19
   6  14  -1    1.18    0.19
   6  14  -1    0.80    0.16
  -6 -14   1    0.69    0.16
  -6 -14   1    1.36    0.19
   6  14  -2   15.11    0.56
   6  14  -2   14.58    0.53
   6  14  -2   13.18    0.57
  -6 -14   2   14.13    0.55
  -6 -14   2   14.60    0.56
   6  14  -3    0.06    0.09
   6  14  -3   -0.04    0.05
   6  14  -3   -0.03    0.05
  -6 -14   3    0.03    0.11
  -6 -14   3   -0.11    0.09
   6  14  -4    5.82    0.31
   6  14  -4    6.28    0.37
  -6 -14   4    6.34    0.37
  -6 -14   4    6.21    0.37
   6  14  -5    0.67    0.17
  -6 -14   5    0.75    0.17
  -6 -14   5    0.76    0.18
   6  14  -6   -0.10    0.09
  -6 -14   6   -0.07    0.11
  -6 -14   6   -0.19    0.10
   6  14  -7   -0.01    0.11
  -6 -14   7    0.10    0.12
  -6 -14   7   -0.06    0.12
  -6 -14   8    0.10    0.15
   7  14   2   -0.07    0.13
   7  14   1    0.11    0.13
   7  14   1    0.40    0.15
   7  14   1    0.10    0.12
   7  14   0    0.03    0.11
   7  14   0    0.22    0.14
   7  14   0    0.21    0.13
   7  14  -1   -0.11    0.09
   7  14  -1   -0.09    0.09
   7  14  -1    0.07    0.11
  -7 -14   1   -0.12    0.09
   7  14  -2    0.13    0.11
   7  14  -2    0.17    0.11
   7  14  -2    0.07    0.11
  -7 -14   2    0.04    0.10
  -7 -14   2    0.09    0.11
   7  14  -3   -0.08    0.05
   7  14  -3   -0.05    0.09
   7  14  -3   -0.03    0.06
  -7 -14   3    0.11    0.12
  -7 -14   3   -0.11    0.10
   7  14  -4    2.82    0.31
  -7 -14   4    2.92    0.32
  -7 -14   4    3.16    0.32
   7  14  -5    0.48    0.16
  -7 -14   5    0.47    0.16
  -7 -14   5    0.31    0.15
   7  14  -6    0.85    0.20
  -7 -14   6    0.90    0.21
  -7 -14   6    0.79    0.19
  -7 -14   7   -0.03    0.13
   8  14   1    0.01    0.14
   8  14   0    0.10    0.13
   8  14  -1    0.12    0.13
   8  14  -1   -0.06    0.10
   8  14  -1    0.15    0.12
   8  14  -2    0.49    0.14
   8  14  -2    0.56    0.17
   8  14  -2    0.42    0.14
  -8 -14   2    0.69    0.18
  -8 -14   2    0.51    0.16
   8  14  -3    0.30    0.15
  -8 -14   3    0.62    0.19
  -8 -14   3    0.28    0.14
   8  14  -4    0.23    0.13
  -8 -14   4    0.11    0.13
  -8 -14   4   -0.04    0.10
  -8 -14   5    0.39    0.17
  -8 -14   6    0.51    0.19
  -9 -14   3    0.26    0.17
  -9 -14   4   -0.10    0.13
  -9 -14   5    0.11    0.16
   9 -15  -4    0.40    0.18
   9 -15  -3   -0.04    0.11
   9 -15  -2    0.00    0.12
   8 -15  -6   -0.11    0.11
   8 -15  -5    0.00    0.13
   8 -15  -4   -0.07    0.12
   8 -15  -4    0.07    0.11
   8 -15  -3    0.17    0.13
   8 -15  -3    0.31    0.16
   8 -15  -2    0.46    0.17
   8 -15  -2    0.47    0.16
   8 -15  -1    0.11    0.13
   8 -15  -1   -0.08    0.10
   7 -15  -7   -0.03    0.14
   7 -15  -6    0.54    0.17
   7 -15  -6    0.30    0.15
   7 -15  -5    0.71    0.18
   7 -15  -5    0.72    0.18
   7 -15  -4    0.11    0.10
   7 -15  -4   -0.01    0.09
   7 -15  -3    1.27    0.21
   7 -15  -3    1.12    0.22
   7 -15  -2    0.28    0.14
   7 -15  -2    0.22    0.13
   7 -15  -1    0.05    0.10
   7 -15  -1   -0.06    0.11
   7 -15   0    0.39    0.14
  -7  15  -1    0.27    0.14
   7 -15   1    0.33    0.16
   7 -15   2    0.86    0.21
   6 -15  -7   -0.05    0.12
   6 -15  -7   -0.05    0.12
   6 -15  -7   -0.14    0.10
   6 -15  -6    0.07    0.12
   6 -15  -6    0.15    0.13
   6 -15  -5    0.01    0.11
   6 -15  -5    0.30    0.12
   6 -15  -4    1.32    0.22
   6 -15  -4    1.45    0.22
   6 -15  -3    0.72    0.17
   6 -15  -3    0.67    0.16
   6 -15  -2    0.37    0.14
   6 -15  -2    0.39    0.15
   6 -15  -1    0.50    0.15
   6 -15  -1    0.73    0.16
  -6  15   0    2.17    0.24
   6 -15   0    2.00    0.25
   6 -15   0    2.23    0.25
  -6  15  -1    0.91    0.18
   6 -15   1    0.61    0.17
  -6  15  -2    1.50    0.24
   6 -15   2    1.21    0.22
   6 -15   3   -0.05    0.13
   5 -15  -7    0.02    0.11
   5 -15  -7    0.00    0.11
   5 -15  -6   -0.05    0.10
   5 -15  -6    0.17    0.12
   5 -15  -6   -0.02    0.10
   5 -15  -5    3.39    0.27
   5 -15  -5    3.64    0.27
   5 -15  -5    3.43    0.28
   5 -15  -4    1.56    0.22
   5 -15  -4    2.13    0.24
   5 -15  -3    0.35    0.12
   5 -15  -3    0.10    0.09
   5 -15  -2    0.11    0.10
   5 -15  -2    0.12    0.10
  -5  15   1    1.76    0.18
  -5  15   1    1.90    0.20
   5 -15  -1    1.72    0.22
   5 -15  -1    1.61    0.21
  -5  15   0    1.09    0.17
  -5  15   0    1.11    0.18
   5 -15   0    1.24    0.19
   5 -15   0    1.17    0.18
  -5  15  -1    0.10    0.10
   5 -15   1   -0.08    0.08
   5 -15   1   -0.08    0.08
  -5  15  -2    2.96    0.30
   5 -15   2    2.46    0.28
  -5  15  -3    0.04    0.12
   5 -15   3   -0.15    0.11
   5 -15   4    2.52    0.33
   4 -15  -7    0.06    0.12
   4 -15  -6   -0.12    0.09
   4 -15  -6    0.09    0.10
   4 -15  -6    0.02    0.09
   4 -15  -5   -0.05    0.09
   4 -15  -5    0.09    0.10
   4 -15  -5    0.06    0.06
   4 -15  -4    1.77    0.21
   4 -15  -4    1.38    0.19
   4 -15  -4    1.66    0.19
   4 -15  -3   10.29    0.44
   4 -15  -3   10.25    0.45
  -4  15   2    0.14    0.09
  -4  15   2    0.24    0.09
   4 -15  -2    0.30    0.12
   4 -15  -2    0.19    0.11
  -4  15   1    1.21    0.15
  -4  15   1    1.16    0.15
   4 -15  -1    1.12    0.17
   4 -15  -1    1.09    0.18
  -4  15   0    0.47    0.13
  -4  15   0    0.75    0.14
   4 -15   0    0.61    0.14
   4 -15   0    0.75    0.15
  -4  15  -1    0.24    0.10
  -4  15  -1    0.06    0.10
   4 -15   1    0.25    0.10
   4 -15   1    0.29    0.11
  -4  15  -2    0.17    0.11
   4 -15   2    0.23    0.10
   4 -15   2    0.23    0.11
  -4  15  -3   -0.06    0.10
   4 -15   3    0.15    0.14
  -4  15  -4    0.15    0.13
   4 -15   4   -0.05    0.11
   3 -15  -7    0.32    0.16
   3 -15  -6    0.40    0.15
   3 -15  -5    1.06    0.16
   3 -15  -5    0.91    0.16
   3 -15  -5    0.84    0.16
   3 -15  -4    0.88    0.16
   3 -15  -4    1.00    0.17
   3 -15  -4    1.02    0.15
   3 -15  -3    1.90    0.22
   3 -15  -3    1.82    0.16
   3 -15  -3    2.14    0.22
  -3  15   2    0.28    0.09
  -3  15   2    0.26    0.09
   3 -15  -2    0.30    0.07
   3 -15  -2    0.27    0.11
   3 -15  -2    0.13    0.10
  -3  15   1    0.97    0.13
  -3  15   1    0.90    0.14
   3 -15  -1    1.13    0.16
   3 -15  -1    0.96    0.15
  -3  15   0    0.40    0.11
  -3  15   0    0.59    0.13
   3 -15   0    0.34    0.11
   3 -15   0    0.47    0.12
  -3  15  -1    0.44    0.12
  -3  15  -1    0.34    0.12
   3 -15   1    0.43    0.12
   3 -15   1    0.47    0.12
  -3  15  -2    0.40    0.13
  -3  15  -2    0.28    0.12
   3 -15   2    0.27    0.11
   3 -15   2    0.23    0.10
  -3  15  -3    1.47    0.22
  -3  15  -3    1.49    0.22
  -3  15  -4   -0.02    0.10
  -3  15  -4   -0.03    0.11
  -3  15  -5    0.23    0.15
  -3  15  -5    0.06    0.14
  -3  15  -6    0.27    0.16
   2 -15  -7    0.36    0.15
   2 -15  -6    0.01    0.11
   2 -15  -5   -0.15    0.06
   2 -15  -5   -0.19    0.07
   2 -15  -5    0.04    0.08
   2 -15  -4    1.65    0.19
   2 -15  -4    1.43    0.19
   2 -15  -4    1.49    0.18
  -2  15   3    1.92    0.14
  -2  15   3    1.92    0.15
   2 -15  -3    1.73    0.19
   2 -15  -3    1.98    0.17
   2 -15  -3    1.92    0.20
  -2  15   2    4.18    0.21
  -2  15   2    3.93    0.20
   2 -15  -2    4.04    0.24
   2 -15  -2    4.26    0.20
   2 -15  -2    4.10    0.24
  -2  15   1    5.68    0.26
  -2  15   1    5.65    0.27
   2 -15  -1    5.94    0.30
   2 -15  -1    6.41    0.20
   2 -15  -1    6.19    0.29
  -2  15   0   20.31    0.57
  -2  15   0   18.94    0.58
   2 -15   0   18.90    0.60
   2 -15   0   19.88    0.61
  -2  15  -1    0.09    0.09
  -2  15  -1    0.08    0.09
   2 -15   1    0.12    0.08
   2 -15   1    0.08    0.08
  -2  15  -2    5.40    0.30
  -2  15  -2    5.71    0.30
   2 -15   2    5.60    0.29
   2 -15   2    5.34    0.28
  -2  15  -3    0.44    0.14
  -2  15  -3    0.36    0.13
   2 -15   3    0.55    0.13
   2 -15   3    0.45    0.12
  -2  15  -4    0.13    0.11
  -2  15  -4    0.15    0.11
  -2  15  -5    0.23    0.14
  -2  15  -5    0.09    0.12
  -2  15  -6    0.01    0.13
  -2  15  -6    0.17    0.14
   1 -15  -7    0.38    0.18
   1 -15  -6    0.64    0.17
   1 -15  -5    3.99    0.30
  -1  15   4    1.25    0.15
  -1  15   4    1.25    0.15
   1 -15  -4    1.53    0.19
   1 -15  -4    1.54    0.18
   1 -15  -4    1.73    0.18
  -1  15   3    1.39    0.15
  -1  15   3    1.60    0.16
   1 -15  -3    1.34    0.16
   1 -15  -3    1.55    0.17
  -1  15   2    0.40    0.09
  -1  15   2    0.55    0.11
   1 -15  -2    0.50    0.11
   1 -15  -2    0.43    0.09
   1 -15  -2    0.58    0.12
  -1  15   1    0.39    0.09
  -1  15   1    0.22    0.09
   1 -15  -1    0.19    0.09
   1 -15  -1    0.39    0.07
   1 -15  -1    0.25    0.08
  -1  15   0   12.59    0.42
  -1  15   0   11.80    0.42
   1 -15   0   12.47    0.30
   1 -15   0   11.73    0.42
   1 -15   0   11.74    0.42
  -1  15  -1    6.29    0.29
  -1  15  -1    6.47    0.29
   1 -15   1    5.79    0.29
   1 -15   1    6.59    0.30
  -1  15  -2    8.34    0.37
  -1  15  -2    8.63    0.38
   1 -15   2    8.29    0.35
   1 -15   2    8.43    0.36
  -1  15  -3    0.15    0.11
  -1  15  -3    0.36    0.12
   1 -15   3    0.12    0.08
   1 -15   3    0.16    0.08
  -1  15  -4    8.47    0.42
  -1  15  -4    9.29    0.42
   1 -15   4    8.75    0.37
   1 -15   4    8.84    0.37
  -1  15  -5    0.18    0.12
  -1  15  -5    0.30    0.13
  -1  15  -6   -0.03    0.10
  -1  15  -6    0.02    0.12
  -1  15  -7   -0.09    0.13
   0 -15  -6    1.40    0.24
   0 -15  -5    0.40    0.14
   0  15   4    0.42    0.11
   0  15   4    0.21    0.10
   0 -15  -4    0.28    0.11
   0  15   3    9.63    0.37
   0  15   3    9.23    0.36
   0 -15  -3    9.71    0.36
   0 -15  -3    9.71    0.36
   0 -15  -3    9.46    0.40
   0  15   2    8.67    0.34
   0  15   2    9.04    0.34
   0 -15  -2    8.91    0.34
   0 -15  -2    9.17    0.34
   0 -15  -2    9.12    0.35
   0  15   1    0.29    0.08
   0  15   1    0.27    0.08
   0 -15  -1    0.26    0.07
   0 -15  -1    0.22    0.08
   0 -15  -1    0.33    0.09
   0  15   0    0.05    0.07
   0  15   0    0.05    0.07
   0 -15   0    0.09    0.07
   0 -15   0    0.23    0.08
   0  15  -1    0.30    0.05
   0  15  -1    0.08    0.07
   0  15  -1    0.31    0.10
   0 -15   1    0.31    0.09
   0 -15   1    0.28    0.09
   0  15  -2    9.07    0.38
   0  15  -2    8.53    0.26
   0  15  -2    8.51    0.36
   0 -15   2    8.59    0.36
   0 -15   2    9.59    0.37
   0  15  -3    9.14    0.41
   0  15  -3    9.56    0.40
   0 -15   3    9.43    0.38
   0 -15   3    9.69    0.39
   0  15  -4    0.40    0.13
   0  15  -4    0.21    0.12
   0 -15   4    0.16    0.10
   0 -15   4    0.40    0.11
   0  15  -5    0.19    0.12
   0  15  -5    0.15    0.12
   0  15  -6    1.28    0.22
   0  15  -6    1.08    0.20
   0  15  -7    0.13    0.14
   0  15  -7    0.33    0.16
  -1 -15  -6   -0.04    0.11
   1  15   5    0.21    0.11
   1  15   5    0.42    0.13
  -1 -15  -5    0.42    0.14
   1  15   4    9.36    0.41
   1  15   4    9.02    0.39
  -1 -15  -4    8.82    0.43
   1  15   3    0.13    0.09
   1  15   3    0.22    0.10
  -1 -15  -3    0.10    0.07
  -1 -15  -3    0.23    0.10
   1  15   2    8.39    0.34
   1  15   2    8.78    0.36
  -1 -15  -2    8.14    0.35
  -1 -15  -2    8.64    0.32
  -1 -15  -2    8.24    0.32
   1  15   1    6.42    0.29
   1  15   1    6.30    0.28
  -1 -15  -1    6.37    0.27
  -1 -15  -1    5.90    0.27
   1  15   0   12.54    0.42
   1  15   0   11.76    0.42
   1  15   0   12.34    0.38
  -1 -15   0   11.67    0.41
  -1 -15   0   12.54    0.43
   1  15  -1    0.23    0.06
   1  15  -1    0.29    0.09
   1  15  -1    0.24    0.09
  -1 -15   1    0.37    0.10
  -1 -15   1    0.29    0.09
   1  15  -2    0.31    0.07
   1  15  -2    0.43    0.11
   1  15  -2    0.46    0.11
  -1 -15   2    0.47    0.11
  -1 -15   2    0.58    0.12
   1  15  -3    1.83    0.20
   1  15  -3    1.39    0.13
   1  15  -3    1.52    0.18
  -1 -15   3    1.74    0.20
  -1 -15   3    1.71    0.20
   1  15  -4    1.61    0.20
   1  15  -4    1.28    0.19
  -1 -15   4    1.45    0.19
  -1 -15   4    1.46    0.19
   1  15  -5    3.96    0.29
   1  15  -5    3.73    0.27
  -1 -15   5    4.25    0.27
  -1 -15   5    3.70    0.27
   1  15  -6    0.90    0.18
   1  15  -6    0.59    0.16
   1  15  -7    0.29    0.15
   1  15  -7    0.33    0.15
   2  15   6   -0.01    0.11
   2  15   5    0.24    0.12
   2  15   5    0.37    0.14
  -2 -15  -5    0.40    0.15
   2  15   4    0.08    0.10
   2  15   4    0.01    0.10
  -2 -15  -4    0.19    0.11
   2  15   3    0.34    0.12
   2  15   3    0.41    0.12
  -2 -15  -3    0.53    0.14
   2  15   2    5.19    0.29
   2  15   2    5.27    0.30
  -2 -15  -2    5.72    0.30
  -2 -15  -2    5.94    0.26
  -2 -15  -2    5.46    0.25
   2  15   1    0.15    0.08
   2  15   1    0.18    0.09
  -2 -15  -1    0.09    0.08
  -2 -15  -1    0.11    0.08
   2  15   0   18.54    0.57
   2  15   0   18.51    0.58
   2  15   0   18.56    0.57
  -2 -15   0   19.31    0.57
  -2 -15   0   19.76    0.58
   2  15  -1    5.82    0.28
   2  15  -1    6.25    0.27
   2  15  -1    6.07    0.30
  -2 -15   1    6.26    0.30
  -2 -15   1    6.17    0.29
   2  15  -2    3.98    0.21
   2  15  -2    4.04    0.24
   2  15  -2    3.93    0.24
  -2 -15   2    3.64    0.24
  -2 -15   2    3.76    0.24
   2  15  -3    1.67    0.20
   2  15  -3    1.77    0.17
   2  15  -3    2.04    0.21
  -2 -15   3    1.42    0.18
  -2 -15   3    1.79    0.20
   2  15  -4    1.24    0.15
   2  15  -4    1.40    0.19
   2  15  -4    1.55    0.20
  -2 -15   4    1.11    0.18
  -2 -15   4    1.51    0.19
   2  15  -5    0.14    0.11
   2  15  -5   -0.04    0.09
   2  15  -5   -0.02    0.07
  -2 -15   5    0.07    0.10
  -2 -15   5    0.05    0.10
   2  15  -6   -0.02    0.11
   2  15  -6    0.07    0.11
  -2 -15   6    0.02    0.11
  -2 -15   6    0.01    0.09
   3  15   6   -0.05    0.12
   3  15   5   -0.07    0.10
   3  15   5   -0.14    0.10
  -3 -15  -5    0.11    0.12
   3  15   4    0.02    0.11
   3  15   4    0.01    0.10
  -3 -15  -4    0.14    0.11
   3  15   3    1.44    0.20
   3  15   3    1.33    0.20
  -3 -15  -3    1.74    0.22
   3  15   2    0.27    0.12
   3  15   2    0.37    0.13
  -3 -15  -2    0.35    0.12
   3  15   1    0.46    0.12
   3  15   1    0.43    0.12
   3  15   1    0.36    0.12
  -3 -15  -1    0.37    0.10
  -3 -15  -1    0.43    0.11
   3  15   0    0.42    0.11
   3  15   0    0.34    0.11
   3  15   0    0.16    0.09
  -3 -15   0    0.55    0.12
  -3 -15   0    0.54    0.12
   3  15  -1    0.99    0.15
   3  15  -1    0.74    0.13
   3  15  -1    0.82    0.14
  -3 -15   1    1.11    0.16
  -3 -15   1    1.04    0.15
   3  15  -2    0.33    0.11
   3  15  -2    0.11    0.07
   3  15  -2    0.36    0.11
  -3 -15   2    0.31    0.11
  -3 -15   2    0.40    0.11
   3  15  -3    1.45    0.18
   3  15  -3    2.01    0.20
   3  15  -3    1.59    0.18
  -3 -15   3    1.88    0.21
  -3 -15   3    1.56    0.20
   3  15  -4    0.97    0.16
   3  15  -4    0.69    0.13
   3  15  -4    0.72    0.16
  -3 -15   4    0.92    0.17
  -3 -15   4    0.60    0.14
   3  15  -5    0.98    0.15
  -3 -15   5    1.09    0.19
  -3 -15   5    1.18    0.19
   3  15  -6    0.41    0.14
   3  15  -6    0.45    0.13
   3  15  -6    0.12    0.11
  -3 -15   6    0.45    0.14
  -3 -15   6    0.09    0.12
   4  15   5    0.00    0.11
   4  15   4    0.15    0.12
   4  15   4    0.09    0.11
  -4 -15  -4   -0.03    0.09
   4  15   3    0.00    0.10
   4  15   3   -0.04    0.10
  -4 -15  -3   -0.01    0.08
   4  15   2    0.29    0.12
   4  15   2    0.19    0.11
  -4 -15  -2    0.24    0.10
   4  15   1    0.15    0.10
   4  15   1    0.13    0.10
   4  15   1    0.26    0.11
  -4 -15  -1    0.07    0.08
   4  15   0    0.63    0.13
   4  15   0    0.65    0.14
   4  15   0    0.42    0.12
  -4 -15   0    0.28    0.11
  -4 -15   0    0.67    0.14
   4  15  -1    1.20    0.17
   4  15  -1    0.97    0.16
   4  15  -1    1.13    0.16
  -4 -15   1    1.08    0.16
  -4 -15   1    1.19    0.17
   4  15  -2    0.12    0.09
   4  15  -2    0.31    0.11
   4  15  -2    0.28    0.11
  -4 -15   2    0.17    0.10
  -4 -15   2    0.22    0.11
   4  15  -3    9.94    0.40
   4  15  -3   10.43    0.43
   4  15  -3   10.42    0.42
  -4 -15   3    9.92    0.44
  -4 -15   3    9.76    0.44
   4  15  -4    1.41    0.19
  -4 -15   4    1.26    0.19
  -4 -15   4    1.75    0.22
   4  15  -5    0.13    0.09
   4  15  -5   -0.06    0.08
   4  15  -5    0.04    0.09
  -4 -15   5    0.16    0.12
  -4 -15   5    0.03    0.11
   4  15  -6    0.06    0.10
  -4 -15   6   -0.06    0.10
  -4 -15   6    0.03    0.11
   4  15  -7   -0.16    0.07
  -4 -15   7   -0.15    0.09
  -4 -15   7   -0.02    0.11
   5  15   4    2.72    0.33
   5  15   3    0.25    0.13
   5  15   3    0.12    0.12
  -5 -15  -3    0.18    0.12
   5  15   2    2.79    0.30
   5  15   2    2.32    0.28
  -5 -15  -2    2.00    0.26
   5  15   1   -0.02    0.09
   5  15   1    0.01    0.10
   5  15   1    0.00    0.10
   5  15   0    1.02    0.17
   5  15   0    1.28    0.19
   5  15   0    1.17    0.18
  -5 -15   0    1.22    0.17
  -5 -15   0    1.03    0.16
   5  15  -1    1.54    0.21
   5  15  -1    1.91    0.22
   5  15  -1    1.89    0.22
  -5 -15   1    1.62    0.20
  -5 -15   1    1.77    0.21
   5  15  -2   -0.10    0.07
   5  15  -2   -0.14    0.08
   5  15  -2   -0.05    0.08
  -5 -15   2   -0.21    0.08
  -5 -15   2   -0.01    0.08
   5  15  -3    0.22    0.10
   5  15  -3    0.28    0.11
   5  15  -3    0.20    0.11
  -5 -15   3    0.31    0.13
  -5 -15   3    0.17    0.12
   5  15  -4    1.62    0.19
   5  15  -4    1.42    0.18
   5  15  -4    1.56    0.20
  -5 -15   4    1.48    0.21
  -5 -15   4    1.54    0.23
   5  15  -5    3.14    0.26
  -5 -15   5    3.85    0.30
  -5 -15   5    3.69    0.30
   5  15  -6    0.01    0.10
  -5 -15   6    0.09    0.12
  -5 -15   6    0.04    0.11
   5  15  -7    0.10    0.12
  -5 -15   7   -0.02    0.12
  -5 -15   7    0.03    0.12
  -5 -15   8    0.06    0.14
   6  15   3   -0.06    0.11
   6  15   2    1.29    0.23
   6  15   2    1.32    0.22
  -6 -15  -2    1.33    0.24
   6  15   1    0.75    0.18
   6  15   1    0.46    0.15
   6  15   1    0.73    0.18
   6  15   0    2.14    0.26
   6  15   0    1.78    0.24
   6  15   0    2.24    0.26
   6  15  -1    0.59    0.15
   6  15  -1    0.63    0.15
   6  15  -1    0.62    0.15
  -6 -15   1    0.26    0.12
  -6 -15   1    0.51    0.13
   6  15  -2    0.22    0.11
   6  15  -2    0.40    0.13
   6  15  -2    0.51    0.15
  -6 -15   2    0.14    0.11
  -6 -15   2    0.61    0.16
   6  15  -3    0.80    0.16
   6  15  -3    0.69    0.14
   6  15  -3    0.80    0.17
  -6 -15   3    0.84    0.18
  -6 -15   3    0.78    0.16
   6  15  -4    1.70    0.23
   6  15  -4    1.17    0.17
   6  15  -4    1.55    0.20
  -6 -15   4    1.00    0.19
  -6 -15   4    1.28    0.22
   6  15  -5    0.24    0.13
  -6 -15   5    0.33    0.14
  -6 -15   5    0.37    0.16
   6  15  -6    0.31    0.13
  -6 -15   6    0.26    0.15
  -6 -15   6    0.09    0.12
   6  15  -7   -0.05    0.10
  -6 -15   7    0.19    0.13
  -6 -15   7    0.02    0.11
  -6 -15   8   -0.01    0.15
   7  15   2    0.69    0.20
   7  15   1    0.28    0.15
   7  15   1    0.13    0.14
   7  15   0    0.29    0.14
   7  15   0    0.09    0.13
   7  15   0    0.21    0.14
   7  15  -1    0.22    0.12
   7  15  -1    0.01    0.10
   7  15  -1   -0.09    0.09
   7  15  -2    0.10    0.12
   7  15  -2    0.35    0.13
   7  15  -2    0.32    0.13
  -7 -15   2    0.10    0.12
  -7 -15   2    0.16    0.13
   7  15  -3    1.36    0.20
   7  15  -3    0.97    0.17
   7  15  -3    1.43    0.22
  -7 -15   3    0.86    0.19
  -7 -15   3    1.03    0.19
   7  15  -4   -0.10    0.09
  -7 -15   4    0.15    0.13
  -7 -15   4   -0.04    0.09
   7  15  -5    0.45    0.15
  -7 -15   5    0.64    0.18
  -7 -15   5    1.10    0.21
   7  15  -6    0.16    0.13
  -7 -15   6    0.39    0.16
  -7 -15   6    0.25    0.14
  -7 -15   7   -0.13    0.12
   8  15   0   -0.06    0.13
   8  15  -1    0.02    0.11
   8  15  -1    0.17    0.14
   8  15  -2    0.71    0.19
   8  15  -2    0.63    0.18
   8  15  -2    0.48    0.15
  -8 -15   2    0.45    0.15
  -8 -15   2    0.76    0.19
   8  15  -3    0.34    0.14
  -8 -15   3    0.23    0.15
  -8 -15   3    0.17    0.13
   8  15  -4    0.09    0.12
  -8 -15   4   -0.09    0.11
  -8 -15   4   -0.02    0.13
  -8 -15   5    0.34    0.17
  -8 -15   6   -0.06    0.12
  -9 -15   3   -0.18    0.13
  -9 -15   4    0.22    0.16
   9 -16  -3   -0.06    0.11
   8 -16  -6    0.01    0.13
   8 -16  -5    0.19    0.16
   8 -16  -4   -0.16    0.11
   8 -16  -3    0.32    0.15
   8 -16  -3    0.04    0.13
   8 -16  -2    0.27    0.13
   8 -16  -2    0.14    0.13
   8 -16  -1    0.12    0.11
   8 -16  -1   -0.04    0.12
   7 -16  -7   -0.04    0.12
   7 -16  -6   -0.10    0.10
   7 -16  -6   -0.17    0.11
   7 -16  -5    0.11    0.12
   7 -16  -5   -0.03    0.12
   7 -16  -4    0.05    0.11
   7 -16  -4    0.73    0.17
   7 -16  -3    0.26    0.14
   7 -16  -3    0.00    0.11
   7 -16  -2   -0.01    0.10
   7 -16  -2   -0.01    0.11
   7 -16  -1    0.09    0.12
   7 -16  -1    0.42    0.14
   7 -16   0    0.01    0.09
  -7  16  -1    0.18    0.13
   7 -16   1    0.11    0.14
   7 -16   2    0.76    0.22
   6 -16  -7    0.06    0.13
   6 -16  -7   -0.05    0.11
   6 -16  -6   -0.02    0.10
   6 -16  -6    0.14    0.12
   6 -16  -5    0.42    0.14
   6 -16  -5    0.19    0.12
   6 -16  -4   -0.07    0.09
   6 -16  -4    0.16    0.11
   6 -16  -3   -0.13    0.08
   6 -16  -3    0.09    0.11
   6 -16  -2    0.67    0.17
   6 -16  -2    0.73    0.16
   6 -16  -1    3.72    0.30
   6 -16  -1    3.77    0.30
  -6  16   0   -0.05    0.09
  -6  16   0    0.07    0.10
   6 -16   0    0.04    0.11
   6 -16   0   -0.07    0.09
  -6  16  -1    1.08    0.20
  -6  16  -2    0.14    0.12
   6 -16   2    0.37    0.16
   6 -16   3    0.36    0.17
   5 -16  -7    0.85    0.19
   5 -16  -7    0.93    0.20
   5 -16  -6    0.28    0.13
   5 -16  -6    0.32    0.13
   5 -16  -6    0.19    0.13
   5 -16  -5    1.46    0.21
   5 -16  -5    1.67    0.24
   5 -16  -4    1.20    0.20
   5 -16  -4    0.94    0.17
   5 -16  -3   -0.02    0.09
   5 -16  -3    0.03    0.11
   5 -16  -2   -0.05    0.08
   5 -16  -2   -0.03    0.10
  -5  16   1    0.41    0.11
  -5  16   1    0.51    0.11
   5 -16  -1    0.39    0.14
   5 -16  -1    0.29    0.11
  -5  16   0    0.20    0.11
  -5  16   0    0.04    0.09
   5 -16   0    0.21    0.12
   5 -16   0    0.13    0.11
   5 -16   1    0.99    0.17
   5 -16   1    1.34    0.19
  -5  16  -2    0.14    0.11
  -5  16  -3    0.89    0.20
   4 -16  -7    0.07    0.13
   4 -16  -6    0.17    0.10
   4 -16  -6   -0.08    0.09
   4 -16  -6   -0.05    0.10
   4 -16  -5    2.04    0.23
   4 -16  -5    1.42    0.21
   4 -16  -5    1.70    0.21
   4 -16  -4    0.15    0.09
   4 -16  -4    0.20    0.12
   4 -16  -4    0.26    0.11
   4 -16  -3    4.23    0.28
   4 -16  -3    4.37    0.31
  -4  16   2    0.97    0.13
   4 -16  -2    1.00    0.18
   4 -16  -2    1.15    0.18
  -4  16   1    0.49    0.12
  -4  16   1    0.16    0.10
   4 -16  -1    0.47    0.13
   4 -16  -1    0.37    0.13
  -4  16   0    0.53    0.13
  -4  16   0    0.73    0.14
   4 -16   0    0.91    0.16
   4 -16   0    0.79    0.16
  -4  16  -1    0.12    0.09
  -4  16  -1   -0.05    0.08
   4 -16   1   -0.07    0.08
   4 -16   1   -0.02    0.09
  -4  16  -2    2.26    0.26
  -4  16  -2    1.90    0.24
   4 -16   2    1.98    0.22
   4 -16   2    2.24    0.23
  -4  16  -3    1.81    0.25
  -4  16  -3    2.07    0.27
  -4  16  -4    2.13    0.29
  -4  16  -4    2.11    0.28
  -4  16  -5    0.19    0.16
   3 -16  -7    1.87    0.27
   3 -16  -6   -0.01    0.10
   3 -16  -5    0.12    0.09
   3 -16  -5    0.20    0.11
   3 -16  -5    0.13    0.11
   3 -16  -4    1.81    0.21
   3 -16  -4    1.79    0.20
   3 -16  -4    1.72    0.21
   3 -16  -3    2.61    0.19
   3 -16  -3    3.00    0.25
   3 -16  -3    3.04    0.23
  -3  16   2    0.43    0.10
  -3  16   2    0.17    0.09
   3 -16  -2    0.31    0.12
   3 -16  -2    0.44    0.12
  -3  16   1    1.03    0.15
  -3  16   1    1.26    0.16
   3 -16  -1    1.37    0.18
   3 -16  -1    0.93    0.16
  -3  16   0    0.22    0.10
  -3  16   0    0.07    0.10
   3 -16   0    0.15    0.09
   3 -16   0    0.14    0.09
  -3  16  -1   -0.04    0.09
  -3  16  -1   -0.03    0.09
   3 -16   1    0.06    0.09
   3 -16   1    0.03    0.08
  -3  16  -2    0.41    0.13
  -3  16  -2    0.29    0.11
   3 -16   2    0.27    0.11
   3 -16   2    0.15    0.10
  -3  16  -3    1.41    0.21
  -3  16  -3    1.12    0.20
  -3  16  -4    0.72    0.18
  -3  16  -4    0.53    0.17
  -3  16  -5    3.63    0.37
  -3  16  -5    4.56    0.37
  -3  16  -6    0.55    0.20
   2 -16  -7    0.32    0.16
   2 -16  -6    0.09    0.12
   2 -16  -5    6.90    0.34
   2 -16  -5    7.40    0.34
   2 -16  -5    7.27    0.39
   2 -16  -4    0.06    0.06
   2 -16  -4    0.03    0.09
   2 -16  -4    0.07    0.09
  -2  16   3    0.76    0.12
  -2  16   3    0.62    0.11
   2 -16  -3    0.72    0.12
   2 -16  -3    0.58    0.14
   2 -16  -3    0.92    0.15
  -2  16   2   12.43    0.41
  -2  16   2   12.01    0.40
   2 -16  -2   12.92    0.47
   2 -16  -2   12.57    0.46
   2 -16  -2   12.44    0.39
  -2  16   1    4.02    0.23
  -2  16   1    3.91    0.23
   2 -16  -1    4.09    0.24
   2 -16  -1    3.67    0.25
  -2  16   0    2.34    0.18
  -2  16   0    2.38    0.19
   2 -16   0    2.43    0.20
   2 -16   0    2.25    0.19
  -2  16  -1    2.73    0.24
  -2  16  -1    2.67    0.22
   2 -16   1    2.48    0.23
   2 -16   1    2.51    0.21
  -2  16  -2    3.67    0.26
  -2  16  -2    3.39    0.25
   2 -16   2    3.93    0.24
   2 -16   2    4.00    0.26
  -2  16  -3    0.22    0.11
  -2  16  -3    0.10    0.11
   2 -16   3    0.13    0.10
   2 -16   3    0.13    0.09
  -2  16  -4    0.42    0.15
  -2  16  -4    0.36    0.14
  -2  16  -5    0.41    0.15
  -2  16  -5    0.53    0.17
  -2  16  -6    0.12    0.15
   1 -16  -7   -0.12    0.11
   1 -16  -6    0.95    0.19
   1 -16  -5    3.61    0.29
  -1  16   4    0.32    0.10
  -1  16   4    0.38    0.10
   1 -16  -4    0.21    0.10
   1 -16  -4    0.41    0.13
   1 -16  -4    0.39    0.11
  -1  16   3    4.77    0.25
  -1  16   3    5.16    0.25
   1 -16  -3    5.13    0.27
   1 -16  -3    5.28    0.27
   1 -16  -3    4.94    0.28
  -1  16   2    1.03    0.14
  -1  16   2    0.89    0.13
   1 -16  -2    0.95    0.14
   1 -16  -2    0.92    0.15
   1 -16  -2    1.14    0.13
  -1  16   1    4.70    0.25
  -1  16   1    4.41    0.24
   1 -16  -1    4.89    0.26
   1 -16  -1    4.83    0.19
   1 -16  -1    4.20    0.24
  -1  16   0    1.49    0.16
  -1  16   0    1.34    0.16
   1 -16   0    1.38    0.16
   1 -16   0    1.49    0.17
  -1  16  -1    3.35    0.22
  -1  16  -1    3.05    0.21
   1 -16   1    3.41    0.22
   1 -16   1    3.49    0.24
  -1  16  -2    0.59    0.13
  -1  16  -2    0.47    0.13
   1 -16   2    0.57    0.13
   1 -16   2    0.70    0.14
  -1  16  -3    6.91    0.36
  -1  16  -3    6.39    0.34
  -1  16  -4    3.27    0.26
  -1  16  -4    3.42    0.27
   1 -16   4    3.12    0.23
   1 -16   4    3.35    0.23
  -1  16  -5    2.22    0.26
  -1  16  -5    1.98    0.26
  -1  16  -6    0.93    0.20
  -1  16  -6    0.88    0.19
  -1  16  -7   -0.01    0.12
   0 -16  -6    0.09    0.11
   0 -16  -5    0.43    0.15
   0  16   4    5.54    0.28
   0  16   4    5.33    0.29
   0 -16  -4    5.76    0.33
   0  16   3   12.90    0.46
   0  16   3   13.42    0.45
   0 -16  -3   13.12    0.44
   0 -16  -3   13.46    0.49
   0 -16  -3   13.25    0.45
   0  16   2    1.65    0.17
   0  16   2    1.73    0.17
   0 -16  -2    1.85    0.16
   0 -16  -2    1.84    0.18
   0 -16  -2    1.71    0.17
   0  16   1    1.08    0.14
   0  16   1    1.29    0.15
   0 -16  -1    1.23    0.13
   0 -16  -1    1.08    0.14
   0 -16  -1    1.23    0.16
   0  16   0    4.07    0.23
   0  16   0    4.34    0.24
   0 -16   0    4.17    0.18
   0 -16   0    4.63    0.24
   0 -16   0    4.30    0.25
   0  16  -1    1.01    0.15
   0  16  -1    1.14    0.15
   0  16  -1    0.98    0.09
   0 -16   1    1.38    0.16
   0 -16   1    1.11    0.15
   0  16  -2    1.97    0.21
   0  16  -2    1.74    0.19
   0 -16   2    1.78    0.19
   0 -16   2    1.78    0.19
   0  16  -3   13.67    0.50
   0  16  -3   13.04    0.51
   0 -16   3   13.66    0.50
   0 -16   3   14.24    0.50
   0 -16   4    2.17    0.19
   0 -16   4    2.94    0.22
   0  16  -5    0.55    0.16
   0  16  -5    0.54    0.16
   0  16  -6   -0.13    0.11
   0  16  -6    0.05    0.12
   0  16  -7    0.87    0.21
   0  16  -7    1.71    0.27
  -1 -16  -6    0.39    0.15
   1  16   5    1.71    0.21
   1  16   5    2.04    0.24
  -1 -16  -5    1.74    0.24
   1  16   4    3.12    0.25
   1  16   4    3.29    0.24
  -1 -16  -4    3.18    0.27
   1  16   3    6.22    0.31
   1  16   3    6.86    0.34
  -1 -16  -3    7.04    0.36
  -1 -16  -3    6.49    0.29
   1  16   2    0.53    0.12
   1  16   2    0.50    0.12
  -1 -16  -2    0.40    0.11
  -1 -16  -2    0.50    0.11
  -1 -16  -2    0.57    0.11
   1  16   1    3.31    0.21
   1  16   1    3.39    0.22
  -1 -16  -1    3.89    0.22
  -1 -16  -1    3.10    0.20
  -1 -16  -1    3.38    0.21
   1  16   0    1.51    0.16
   1  16   0    1.35    0.13
   1  16   0    1.18    0.16
  -1 -16   0    1.25    0.15
  -1 -16   0    1.38    0.16
   1  16  -1    5.01    0.21
   1  16  -1    5.05    0.27
   1  16  -1    4.70    0.25
  -1 -16   1    4.43    0.25
  -1 -16   1    4.67    0.26
   1  16  -2    1.02    0.16
   1  16  -2    1.39    0.18
   1  16  -2    0.86    0.11
  -1 -16   2    0.80    0.14
  -1 -16   2    1.04    0.15
   1  16  -3    4.61    0.21
   1  16  -3    4.46    0.27
   1  16  -3    5.05    0.29
  -1 -16   3    4.68    0.28
  -1 -16   3    4.93    0.28
   1  16  -4    0.19    0.12
   1  16  -4    0.29    0.12
  -1 -16   4    0.42    0.13
  -1 -16   4    0.28    0.11
   1  16  -5    3.21    0.26
   1  16  -5    3.33    0.27
  -1 -16   5    3.29    0.25
  -1 -16   5    3.22    0.24
   1  16  -6    1.12    0.20
   1  16  -6    1.14    0.21
   1  16  -7   -0.01    0.13
   1  16  -7   -0.06    0.12
   2  16   5    0.29    0.13
   2  16   5    0.35    0.14
  -2 -16  -5    0.73    0.18
   2  16   4    0.37    0.14
   2  16   4    0.26    0.13
  -2 -16  -4    0.35    0.12
   2  16   3    0.04    0.10
   2  16   3    0.11    0.10
  -2 -16  -3    0.08    0.09
   2  16   2    3.50    0.25
   2  16   2    3.32    0.23
  -2 -16  -2    3.46    0.21
  -2 -16  -2    3.63    0.20
  -2 -16  -2    2.93    0.23
   2  16   1    2.35    0.22
   2  16   1    2.41    0.20
  -2 -16  -1    2.05    0.19
  -2 -16  -1    2.56    0.19
  -2 -16  -1    2.63    0.20
   2  16   0    1.87    0.19
   2  16   0    2.09    0.21
   2  16   0    2.12    0.16
  -2 -16   0    2.42    0.20
  -2 -16   0    2.38    0.19
   2  16  -1    4.33    0.25
   2  16  -1    3.72    0.23
   2  16  -1    3.99    0.22
  -2 -16   1    3.95    0.24
  -2 -16   1    3.79    0.25
   2  16  -2   11.44    0.40
   2  16  -2   11.99    0.44
   2  16  -2   12.01    0.46
  -2 -16   2   12.75    0.47
  -2 -16   2   12.43    0.46
   2  16  -3    0.62    0.11
   2  16  -3    0.89    0.16
   2  16  -3    1.12    0.17
  -2 -16   3    0.81    0.16
  -2 -16   3    0.97    0.16
   2  16  -4    0.14    0.11
   2  16  -4    0.02    0.07
   2  16  -4    0.22    0.12
  -2 -16   4    0.14    0.11
  -2 -16   4    0.12    0.11
   2  16  -5    7.00    0.37
   2  16  -5    6.95    0.36
  -2 -16   5    7.38    0.38
  -2 -16   5    7.02    0.37
   2  16  -6    0.15    0.12
   2  16  -6   -0.05    0.11
  -2 -16   6   -0.01    0.08
  -2 -16   6    0.00    0.09
   3  16   6    0.55    0.18
   3  16   5    4.74    0.35
   3  16   5    4.88    0.34
  -3 -16  -5    4.66    0.37
   3  16   4    0.65    0.16
   3  16   4    0.54    0.15
  -3 -16  -4    0.49    0.15
   3  16   3    1.56    0.22
   3  16   3    1.40    0.20
  -3 -16  -3    1.61    0.22
   3  16   2    0.07    0.09
   3  16   2    0.11    0.09
  -3 -16  -2    0.11    0.09
   3  16   1   -0.04    0.10
   3  16   1    0.03    0.09
   3  16   1    0.00    0.08
  -3 -16  -1   -0.07    0.07
  -3 -16  -1    0.14    0.09
   3  16   0    0.02    0.08
   3  16   0    0.06    0.08
   3  16   0   -0.09    0.07
  -3 -16   0    0.03    0.08
  -3 -16   0    0.19    0.10
   3  16  -1    0.97    0.15
   3  16  -1    1.19    0.17
   3  16  -1    1.07    0.16
  -3 -16   1    1.37    0.18
  -3 -16   1    0.96    0.15
   3  16  -2    0.28    0.12
   3  16  -2    0.35    0.10
   3  16  -2    0.36    0.11
  -3 -16   2    0.26    0.11
  -3 -16   2    0.21    0.12
   3  16  -3    2.29    0.22
   3  16  -3    2.59    0.20
   3  16  -3    2.55    0.24
  -3 -16   3    2.74    0.23
  -3 -16   3    2.38    0.24
   3  16  -4    1.79    0.20
   3  16  -4    1.80    0.19
   3  16  -4    1.77    0.20
  -3 -16   4    1.65    0.21
  -3 -16   4    1.43    0.20
   3  16  -5    0.22    0.12
   3  16  -5    0.15    0.11
   3  16  -5    0.08    0.08
  -3 -16   5    0.16    0.12
  -3 -16   5    0.16    0.11
   3  16  -6    0.18    0.12
   3  16  -6    0.10    0.11
  -3 -16   6    0.10    0.12
  -3 -16   6    0.10    0.12
   4  16   5   -0.03    0.12
   4  16   4    2.21    0.28
   4  16   4    2.16    0.28
  -4 -16  -4    1.89    0.27
   4  16   3    1.77    0.24
   4  16   3    2.14    0.26
  -4 -16  -3    1.67    0.24
   4  16   2    1.78    0.23
   4  16   2    1.73    0.23
  -4 -16  -2    1.96    0.24
   4  16   1    0.10    0.10
   4  16   1    0.03    0.10
   4  16   1   -0.11    0.08
   4  16   0    0.43    0.12
   4  16   0    0.81    0.16
   4  16   0    0.70    0.15
  -4 -16   0    0.57    0.14
  -4 -16   0    0.82    0.15
   4  16  -1    0.56    0.13
   4  16  -1    0.44    0.12
   4  16  -1    0.27    0.11
  -4 -16   1    0.60    0.14
  -4 -16   1    0.23    0.11
   4  16  -2    0.86    0.16
   4  16  -2    0.79    0.15
   4  16  -2    0.76    0.14
  -4 -16   2    0.88    0.16
  -4 -16   2    0.64    0.15
   4  16  -3    4.51    0.28
   4  16  -3    4.62    0.27
   4  16  -3    4.36    0.28
  -4 -16   3    4.27    0.29
  -4 -16   3    4.32    0.29
   4  16  -4    0.09    0.10
   4  16  -4    0.01    0.10
   4  16  -4    0.22    0.10
  -4 -16   4    0.19    0.11
  -4 -16   4    0.23    0.12
   4  16  -5    1.27    0.18
   4  16  -5    1.65    0.21
   4  16  -5    1.84    0.22
  -4 -16   5    1.36    0.20
  -4 -16   5    1.59    0.22
   4  16  -6   -0.05    0.09
  -4 -16   6   -0.18    0.09
  -4 -16   6   -0.02    0.11
  -4 -16   7   -0.17    0.09
  -4 -16   7   -0.12    0.10
   5  16   4    0.71    0.19
   5  16   3    1.30    0.23
   5  16   3    1.15    0.22
  -5 -16  -3    0.94    0.20
   5  16   2    0.16    0.12
   5  16   2    0.32    0.14
  -5 -16  -2    0.21    0.12
   5  16   1    2.81    0.29
   5  16   1    2.52    0.28
   5  16   1    3.07    0.26
   5  16   0    0.20    0.11
   5  16   0    0.07    0.10
   5  16   0    0.04    0.10
  -5 -16   0    0.07    0.09
  -5 -16   0    0.36    0.11
   5  16  -1    0.33    0.13
   5  16  -1    0.22    0.12
   5  16  -1    0.47    0.13
  -5 -16   1    0.46    0.13
  -5 -16   1    0.18    0.11
   5  16  -2   -0.02    0.08
   5  16  -2    0.10    0.09
   5  16  -2   -0.01    0.08
  -5 -16   2   -0.03    0.10
  -5 -16   2    0.02    0.08
   5  16  -3   -0.01    0.07
   5  16  -3   -0.01    0.07
   5  16  -3    0.09    0.09
  -5 -16   3    0.08    0.10
  -5 -16   3   -0.03    0.08
   5  16  -4    0.75    0.15
  -5 -16   4    1.31    0.19
  -5 -16   4    1.03    0.18
   5  16  -5    1.45    0.21
  -5 -16   5    1.88    0.24
  -5 -16   5    1.12    0.20
   5  16  -6    0.44    0.14
  -5 -16   6    0.11    0.11
  -5 -16   6    0.17    0.13
   5  16  -7    1.19    0.22
  -5 -16   7    1.02    0.21
  -5 -16   7    0.97    0.21
  -5 -16   8    0.30    0.17
   6  16   3    0.34    0.16
   6  16   2    0.28    0.15
   6  16   2    0.26    0.14
  -6 -16  -2    0.14    0.12
   6  16   1    0.60    0.16
   6  16   1    0.99    0.20
   6  16   1    0.55    0.16
   6  16   0   -0.10    0.09
   6  16   0   -0.05    0.10
   6  16   0   -0.08    0.09
   6  16  -1    3.78    0.28
   6  16  -1    4.08    0.29
   6  16  -1    3.74    0.30
  -6 -16   1    3.42    0.27
  -6 -16   1    3.73    0.27
   6  16  -2    0.74    0.17
   6  16  -2    0.54    0.14
   6  16  -2    0.78    0.16
  -6 -16   2    0.71    0.17
  -6 -16   2    0.83    0.16
   6  16  -3    0.06    0.09
   6  16  -3    0.00    0.10
   6  16  -3    0.02    0.09
  -6 -16   3    0.08    0.10
  -6 -16   3   -0.01    0.10
   6  16  -4    0.05    0.09
   6  16  -4   -0.04    0.09
   6  16  -4   -0.19    0.07
  -6 -16   4    0.16    0.11
  -6 -16   4    0.31    0.14
   6  16  -5    0.32    0.13
  -6 -16   5    0.06    0.13
  -6 -16   5    0.37    0.15
   6  16  -6   -0.02    0.11
  -6 -16   6    0.00    0.11
  -6 -16   6    0.04    0.12
   6  16  -7    0.26    0.15
  -6 -16   7    0.00    0.13
   7  16   2    0.71    0.21
   7  16   1    0.24    0.14
   7  16   0    0.00    0.12
   7  16   0    0.03    0.12
   7  16   0    0.00    0.11
   7  16  -1    0.30    0.14
   7  16  -1    0.32    0.14
   7  16  -1    0.31    0.14
   7  16  -2   -0.01    0.10
   7  16  -2   -0.02    0.10
   7  16  -2    0.05    0.10
  -7 -16   2    0.08    0.11
  -7 -16   2   -0.13    0.10
   7  16  -3    0.00    0.11
   7  16  -3    0.04    0.10
   7  16  -3    0.09    0.11
  -7 -16   3    0.10    0.11
  -7 -16   3    0.14    0.14
   7  16  -4    0.32    0.13
  -7 -16   4    0.62    0.18
  -7 -16   4    0.62    0.17
   7  16  -5    0.21    0.13
  -7 -16   5    0.04    0.12
  -7 -16   5   -0.10    0.11
   7  16  -6    0.14    0.13
  -7 -16   6    0.03    0.13
  -7 -16   7   -0.02    0.14
   8  16   0    0.88    0.21
   8  16  -1    0.16    0.14
   8  16  -1   -0.08    0.12
   8  16  -2    0.37    0.16
   8  16  -2    0.29    0.14
  -8 -16   2    0.31    0.15
   8  16  -3    0.34    0.14
  -8 -16   3    0.27    0.15
  -8 -16   3    0.35    0.17
  -8 -16   4   -0.03    0.13
  -8 -16   4    0.18    0.15
  -8 -16   5    0.33    0.17
  -8 -16   6   -0.10    0.14
  -9 -16   3    0.10    0.15
   8 -17  -6   -0.03    0.14
   8 -17  -5    0.02    0.14
   8 -17  -4    0.04    0.12
   8 -17  -3    0.46    0.16
   8 -17  -3    0.29    0.15
   8 -17  -2    0.07    0.10
   8 -17  -2    0.02    0.13
   8 -17  -1    0.31    0.12
   8 -17  -1   -0.09    0.11
   7 -17  -7   -0.03    0.14
   7 -17  -6    0.21    0.16
   7 -17  -5    0.03    0.11
   7 -17  -5    0.10    0.13
   7 -17  -4    0.12    0.11
   7 -17  -4    0.24    0.13
   7 -17  -3    0.35    0.15
   7 -17  -3    0.34    0.15
   7 -17  -2    0.06    0.12
   7 -17  -2    0.13    0.12
   7 -17  -1    0.16    0.12
   7 -17  -1    0.33    0.15
   7 -17   0   -0.07    0.11
  -7  17  -1    0.01    0.12
  -7  17  -1    0.02    0.12
   6 -17  -7    0.16    0.15
   6 -17  -7    0.01    0.12
   6 -17  -6    0.17    0.14
   6 -17  -6    0.12    0.13
   6 -17  -5    0.16    0.12
   6 -17  -5    0.05    0.10
   6 -17  -4    0.06    0.12
   6 -17  -4    0.02    0.10
   6 -17  -3    0.59    0.17
   6 -17  -3    0.33    0.14
   6 -17  -2    3.08    0.27
   6 -17  -2    3.06    0.31
   6 -17  -1    2.53    0.29
   6 -17  -1    2.17    0.25
  -6  17   0    0.55    0.14
  -6  17   0    0.59    0.15
   6 -17   0    0.44    0.14
   6 -17   0    0.47    0.15
  -6  17  -1    0.07    0.11
  -6  17  -1    0.04    0.11
  -6  17  -2    0.11    0.13
   5 -17  -7    0.27    0.15
   5 -17  -7    0.38    0.16
   5 -17  -6    0.09    0.12
   5 -17  -6    0.61    0.15
   5 -17  -5    0.75    0.18
   5 -17  -5    0.72    0.16
   5 -17  -4    0.01    0.10
   5 -17  -4   -0.01    0.10
   5 -17  -3    0.07    0.10
   5 -17  -3    0.06    0.09
   5 -17  -2    0.45    0.14
   5 -17  -2    0.77    0.17
  -5  17   1    1.17    0.16
  -5  17   1    0.98    0.16
   5 -17  -1    1.06    0.18
   5 -17  -1    0.82    0.17
  -5  17   0    1.52    0.20
  -5  17   0    1.87    0.22
   5 -17   0    1.58    0.22
   5 -17   0    1.33    0.20
  -5  17  -1    1.45    0.21
  -5  17  -1    1.36    0.21
  -5  17  -2    1.47    0.22
  -5  17  -2    1.32    0.23
  -5  17  -3    0.34    0.16
  -5  17  -3    0.36    0.17
  -5  17  -4   -0.01    0.14
   4 -17  -7    0.02    0.14
   4 -17  -6    0.14    0.10
   4 -17  -6    0.04    0.11
   4 -17  -6   -0.05    0.10
   4 -17  -5    0.09    0.10
   4 -17  -5   -0.03    0.09
   4 -17  -5    0.00    0.10
   4 -17  -4    2.13    0.24
   4 -17  -4    1.92    0.24
   4 -17  -3    1.34    0.21
   4 -17  -3    1.12    0.18
  -4  17   2    0.33    0.10
   4 -17  -2   -0.02    0.10
   4 -17  -2    0.41    0.13
  -4  17   1    0.19    0.10
  -4  17   1    0.12    0.11
   4 -17  -1    0.30    0.12
   4 -17  -1    0.12    0.10
  -4  17   0    1.34    0.18
  -4  17   0    1.07    0.16
   4 -17   0    1.78    0.22
   4 -17   0    1.29    0.19
  -4  17  -1    0.76    0.16
  -4  17  -1    0.42    0.13
   4 -17   1    0.94    0.16
   4 -17   1    0.85    0.16
  -4  17  -2    0.38    0.13
  -4  17  -2    0.35    0.13
   4 -17   2    0.08    0.11
   4 -17   2    0.30    0.11
  -4  17  -3    0.23    0.14
  -4  17  -3    0.44    0.16
  -4  17  -4    0.17    0.14
  -4  17  -4    0.10    0.13
  -4  17  -5    0.30    0.17
   3 -17  -7    0.17    0.15
   3 -17  -6    0.39    0.15
   3 -17  -5   -0.01    0.09
   3 -17  -5    0.01    0.09
   3 -17  -5   -0.02    0.09
   3 -17  -4    2.45    0.24
   3 -17  -4    2.44    0.25
   3 -17  -4    2.36    0.20
   3 -17  -3   11.79    0.41
   3 -17  -3   12.02    0.48
   3 -17  -3   11.08    0.47
  -3  17   2    0.71    0.13
  -3  17   2    0.48    0.11
   3 -17  -2    0.73    0.15
   3 -17  -2    0.61    0.15
  -3  17   1    3.66    0.23
  -3  17   1    2.95    0.22
   3 -17  -1    3.32    0.25
   3 -17  -1    3.33    0.25
  -3  17   0    0.53    0.12
  -3  17   0    0.65    0.14
   3 -17   0    0.50    0.14
   3 -17   0    0.45    0.12
  -3  17  -1    0.43    0.13
  -3  17  -1    0.21    0.12
   3 -17   1    0.51    0.13
   3 -17   1    0.25    0.11
  -3  17  -2    1.88    0.23
  -3  17  -2    1.44    0.21
  -3  17  -3    0.42    0.15
  -3  17  -3    0.26    0.13
  -3  17  -4   -0.04    0.11
  -3  17  -4    0.03    0.12
  -3  17  -5    0.02    0.12
  -3  17  -5    0.01    0.12
   2 -17  -7    0.07    0.12
   2 -17  -6   -0.02    0.10
   2 -17  -5    0.93    0.18
   2 -17  -5    1.03    0.17
   2 -17  -5    0.82    0.16
   2 -17  -4    0.28    0.09
   2 -17  -4    0.65    0.14
   2 -17  -4    0.68    0.15
  -2  17   3    0.44    0.10
  -2  17   3    0.44    0.11
   2 -17  -3    0.62    0.14
   2 -17  -3    0.65    0.15
   2 -17  -3    0.70    0.12
  -2  17   2    5.32    0.26
  -2  17   2    5.99    0.27
   2 -17  -2    5.39    0.30
   2 -17  -2    5.89    0.24
   2 -17  -2    5.36    0.30
  -2  17   1    9.94    0.37
  -2  17   1    9.29    0.37
   2 -17  -1    9.65    0.40
   2 -17  -1    9.06    0.40
  -2  17   0   14.26    0.49
  -2  17   0   15.09    0.51
   2 -17   0   14.95    0.53
   2 -17   0   14.90    0.52
  -2  17  -1    1.62    0.19
  -2  17  -1    1.82    0.20
   2 -17   1    1.86    0.21
   2 -17   1    1.57    0.19
  -2  17  -2    0.12    0.10
  -2  17  -2    0.15    0.12
   2 -17   2    0.28    0.11
   2 -17   2    0.19    0.10
  -2  17  -3    1.19    0.19
  -2  17  -3    0.85    0.17
   2 -17   3    1.11    0.17
   2 -17   3    1.04    0.16
  -2  17  -4    2.07    0.26
  -2  17  -4    2.09    0.26
  -2  17  -5    0.18    0.14
  -2  17  -5    0.42    0.16
  -2  17  -6    0.08    0.14
   1 -17  -7    0.54    0.18
   1 -17  -6    2.59    0.30
   1 -17  -5    5.64    0.35
   1 -17  -4    4.89    0.28
   1 -17  -4    5.22    0.29
   1 -17  -4    5.13    0.31
  -1  17   3    0.31    0.11
  -1  17   3    0.24    0.10
   1 -17  -3    0.39    0.12
   1 -17  -3    0.33    0.11
   1 -17  -3    0.36    0.12
  -1  17   2   -0.04    0.07
  -1  17   2   -0.09    0.07
   1 -17  -2   -0.01    0.08
   1 -17  -2   -0.03    0.06
   1 -17  -2   -0.04    0.07
  -1  17   1    1.72    0.18
  -1  17   1    1.52    0.17
   1 -17  -1    1.81    0.13
   1 -17  -1    1.82    0.19
   1 -17  -1    1.57    0.18
  -1  17   0    5.04    0.27
  -1  17   0    4.96    0.26
   1 -17   0    4.70    0.26
   1 -17   0    4.37    0.26
  -1  17  -1    3.92    0.26
  -1  17  -1    4.16    0.25
   1 -17   1    3.86    0.26
   1 -17   1    4.63    0.26
  -1  17  -2    9.11    0.40
  -1  17  -2    8.79    0.40
   1 -17   2    8.46    0.38
   1 -17   2    9.40    0.39
  -1  17  -3    2.43    0.26
  -1  17  -3    2.22    0.25
   1 -17   3    2.53    0.22
   1 -17   3    2.63    0.21
  -1  17  -4    0.54    0.15
  -1  17  -4    0.45    0.15
   1 -17   4    0.64    0.13
   1 -17   4    0.79    0.15
  -1  17  -5   -0.03    0.11
  -1  17  -5    0.05    0.11
  -1  17  -6    1.41    0.25
  -1  17  -6    1.63    0.26
  -1  17  -7    0.41    0.18
   0 -17  -6   -0.05    0.10
   0 -17  -5    0.49    0.14
   0  17   4    1.67    0.18
   0  17   4    2.34    0.20
   0 -17  -4    2.22    0.24
   0  17   3   15.31    0.52
   0  17   3   14.89    0.50
   0 -17  -3   15.66    0.51
   0 -17  -3   15.60    0.50
   0 -17  -3   14.79    0.54
   0  17   2    8.58    0.35
   0  17   2    7.86    0.33
   0 -17  -2    8.41    0.34
   0 -17  -2    7.71    0.34
   0 -17  -2    8.48    0.34
   0  17   1   11.35    0.41
   0  17   1   11.32    0.42
   0 -17  -1   11.98    0.44
   0 -17  -1   11.67    0.42
   0 -17  -1   12.39    0.39
   0  17   0    0.00    0.07
   0  17   0   -0.13    0.06
   0 -17   0   -0.08    0.06
   0 -17   0    0.01    0.04
   0 -17   0    0.18    0.09
   0  17  -1   11.98    0.45
   0  17  -1   11.68    0.43
   0 -17   1   11.38    0.43
   0 -17   1   12.13    0.44
   0  17  -2    8.22    0.38
   0  17  -2    7.98    0.36
   0 -17   2    7.77    0.36
   0 -17   2    8.15    0.36
   0  17  -3   14.94    0.53
   0  17  -3   15.23    0.56
   0 -17   3   15.43    0.54
   0 -17   3   14.58    0.52
   0  17  -4    1.86    0.23
   0  17  -4    2.03    0.24
   0 -17   4    0.68    0.13
   0 -17   4    0.52    0.12
   0  17  -5    0.26    0.14
   0  17  -5    0.36    0.14
   0  17  -6    0.03    0.12
   0  17  -6   -0.01    0.11
   0  17  -7   -0.04    0.14
   0  17  -7    0.10    0.15
  -1 -17  -6    1.13    0.22
   1  17   5   -0.04    0.10
   1  17   5    0.30    0.13
  -1 -17  -5    0.10    0.11
   1  17   4    0.75    0.15
   1  17   4    0.61    0.14
  -1 -17  -4    0.68    0.15
   1  17   3    2.34    0.23
   1  17   3    2.59    0.24
  -1 -17  -3    2.33    0.18
  -1 -17  -3    2.51    0.22
   1  17   2    8.81    0.37
   1  17   2    8.46    0.37
  -1 -17  -2    8.79    0.35
  -1 -17  -2    8.74    0.37
  -1 -17  -2    9.15    0.36
   1  17   1    3.74    0.24
   1  17   1    4.54    0.25
  -1 -17  -1    4.04    0.24
  -1 -17  -1    4.00    0.24
  -1 -17  -1    4.16    0.23
   1  17   0    4.65    0.26
   1  17   0    4.85    0.23
   1  17   0    4.61    0.25
  -1 -17   0    4.99    0.27
  -1 -17   0    4.23    0.25
   1  17  -1    1.97    0.14
   1  17  -1    1.75    0.19
   1  17  -1    1.51    0.18
  -1 -17   1    1.50    0.18
  -1 -17   1    1.54    0.18
   1  17  -2    0.00    0.09
   1  17  -2   -0.08    0.08
  -1 -17   2   -0.01    0.08
  -1 -17   2    0.27    0.10
   1  17  -3    0.52    0.14
   1  17  -3    0.52    0.14
  -1 -17   3    0.31    0.12
  -1 -17   3    0.50    0.13
   1  17  -4    5.07    0.32
   1  17  -4    4.93    0.31
  -1 -17   4    5.19    0.30
  -1 -17   4    4.45    0.29
   1  17  -6    2.20    0.27
   1  17  -6    2.51    0.28
   1  17  -7    0.59    0.19
   1  17  -7    0.01    0.13
   2  17   5    0.44    0.14
   2  17   5    0.25    0.13
  -2 -17  -5    0.32    0.14
   2  17   4    1.70    0.22
   2  17   4    2.24    0.25
  -2 -17  -4    2.26    0.26
   2  17   3    0.97    0.16
   2  17   3    0.80    0.15
  -2 -17  -3    0.50    0.13
   2  17   2    0.07    0.09
   2  17   2    0.17    0.10
  -2 -17  -2    0.25    0.09
  -2 -17  -2    0.20    0.10
  -2 -17  -2    0.23    0.08
   2  17   1    2.12    0.22
   2  17   1    1.95    0.21
  -2 -17  -1    1.74    0.19
  -2 -17  -1    1.93    0.19
  -2 -17  -1    1.98    0.19
   2  17   0   14.79    0.49
   2  17   0   15.00    0.51
   2  17   0   14.58    0.52
  -2 -17   0   13.91    0.49
  -2 -17   0   14.90    0.51
   2  17  -1    9.23    0.35
   2  17  -1    8.77    0.37
   2  17  -1    8.53    0.38
  -2 -17   1    8.90    0.38
  -2 -17   1    9.19    0.38
   2  17  -2    5.47    0.25
   2  17  -2    5.61    0.31
   2  17  -2    5.14    0.29
  -2 -17   2    5.27    0.31
  -2 -17   2    5.42    0.31
   2  17  -3    0.69    0.11
   2  17  -3    0.86    0.16
   2  17  -3    0.79    0.16
  -2 -17   3    0.61    0.15
  -2 -17   3    0.52    0.14
   2  17  -4    0.47    0.11
   2  17  -4    0.41    0.13
   2  17  -4    0.65    0.15
  -2 -17   4    0.23    0.13
  -2 -17   4    0.39    0.13
   2  17  -5    1.21    0.20
   2  17  -5    0.94    0.18
  -2 -17   5    0.95    0.18
  -2 -17   5    1.02    0.18
   2  17  -6    0.16    0.13
   2  17  -6   -0.13    0.11
  -2 -17   6   -0.04    0.06
  -2 -17   6    0.06    0.07
   3  17   5   -0.08    0.11
   3  17   5   -0.01    0.12
   3  17   4    0.21    0.13
   3  17   4   -0.09    0.09
  -3 -17  -4    0.03    0.11
   3  17   3    0.27    0.13
   3  17   3    0.29    0.12
  -3 -17  -3    0.07    0.09
   3  17   2    1.44    0.20
   3  17   2    1.44    0.20
  -3 -17  -2    1.44    0.20
   3  17   1    0.50    0.14
   3  17   1    0.27    0.12
  -3 -17  -1    0.48    0.12
  -3 -17  -1    0.30    0.11
   3  17   0    0.58    0.12
   3  17   0    0.48    0.13
   3  17   0    0.55    0.14
  -3 -17   0    0.34    0.12
  -3 -17   0    0.58    0.13
   3  17  -1    2.88    0.22
   3  17  -1    2.94    0.23
   3  17  -1    2.62    0.21
  -3 -17   1    2.76    0.23
  -3 -17   1    3.07    0.23
   3  17  -2    0.82    0.15
   3  17  -2    0.79    0.13
   3  17  -2    0.88    0.16
  -3 -17   2    0.85    0.16
  -3 -17   2    0.53    0.13
   3  17  -3   11.68    0.46
   3  17  -3   10.65    0.43
   3  17  -3   11.20    0.43
  -3 -17   3   11.03    0.47
  -3 -17   3   11.16    0.47
   3  17  -4    2.54    0.20
   3  17  -4    2.12    0.23
   3  17  -4    2.28    0.23
  -3 -17   4    2.31    0.24
  -3 -17   4    2.18    0.24
   3  17  -5    0.01    0.10
   3  17  -5   -0.06    0.08
   3  17  -5   -0.02    0.10
  -3 -17   5    0.15    0.12
  -3 -17   5   -0.16    0.09
  -3 -17   6    0.64    0.17
  -3 -17   6    0.66    0.17
   4  17   5    0.06    0.13
   4  17   4   -0.04    0.11
   4  17   4    0.21    0.14
  -4 -17  -4   -0.06    0.09
   4  17   3    0.39    0.15
   4  17   3    0.33    0.15
  -4 -17  -3    0.28    0.14
   4  17   2    0.18    0.12
   4  17   2    0.14    0.11
  -4 -17  -2    0.26    0.12
   4  17   1    0.80    0.16
   4  17   1    1.04    0.18
   4  17   1    0.91    0.17
   4  17   0    1.22    0.18
   4  17   0    1.33    0.19
   4  17   0    1.43    0.20
  -4 -17   0    1.21    0.18
  -4 -17   0    1.12    0.16
   4  17  -1    0.14    0.09
   4  17  -1    0.17    0.10
   4  17  -1    0.21    0.11
  -4 -17   1    0.28    0.11
  -4 -17   1    0.09    0.11
   4  17  -2    0.17    0.11
   4  17  -2    0.23    0.11
   4  17  -2    0.17    0.10
  -4 -17   2    0.11    0.12
  -4 -17   2    0.40    0.13
   4  17  -3    1.18    0.17
   4  17  -3    1.20    0.18
   4  17  -3    1.52    0.19
  -4 -17   3    1.42    0.20
  -4 -17   3    1.57    0.21
   4  17  -4    1.43    0.19
   4  17  -4    1.55    0.19
   4  17  -4    1.38    0.19
  -4 -17   4    1.49    0.21
  -4 -17   4    2.07    0.24
   4  17  -5   -0.10    0.08
   4  17  -5    0.01    0.06
   4  17  -5    0.00    0.06
  -4 -17   5    0.07    0.11
  -4 -17   5    0.00    0.10
   4  17  -6    0.00    0.09
  -4 -17   6   -0.11    0.10
  -4 -17   6   -0.03    0.11
  -4 -17   7   -0.02    0.11
  -4 -17   7    0.06    0.13
   5  17   4    0.10    0.14
   5  17   3    0.27    0.14
   5  17   3    0.37    0.15
  -5 -17  -3    0.17    0.13
   5  17   2    1.55    0.24
   5  17   2    1.30    0.21
  -5 -17  -2    1.68    0.25
   5  17   1    1.36    0.22
   5  17   1    0.92    0.18
   5  17   1    1.02    0.18
   5  17   0    1.65    0.22
   5  17   0    1.56    0.22
   5  17   0    1.80    0.23
  -5 -17   0    1.55    0.19
  -5 -17   0    1.73    0.20
   5  17  -1    0.91    0.17
   5  17  -1    0.99    0.18
   5  17  -1    0.87    0.16
  -5 -17   1    0.75    0.15
  -5 -17   1    0.81    0.15
   5  17  -2    0.68    0.15
   5  17  -2    0.67    0.14
   5  17  -2    0.89    0.16
  -5 -17   2    0.67    0.15
  -5 -17   2    0.78    0.15
   5  17  -3    0.03    0.09
   5  17  -3    0.03    0.09
   5  17  -3    0.00    0.09
  -5 -17   3    0.15    0.10
  -5 -17   3   -0.08    0.08
   5  17  -4   -0.11    0.08
   5  17  -4   -0.01    0.09
   5  17  -4   -0.04    0.08
  -5 -17   4    0.05    0.11
  -5 -17   4   -0.11    0.09
   5  17  -5    0.45    0.15
   5  17  -5    0.83    0.16
  -5 -17   5    0.59    0.16
  -5 -17   5    0.83    0.18
   5  17  -6   -0.08    0.08
  -5 -17   6    0.08    0.12
  -5 -17   6   -0.06    0.11
   5  17  -7    0.33    0.15
  -5 -17   7    0.36    0.17
  -5 -17   7    0.71    0.20
   6  17   3   -0.10    0.12
   6  17   2    0.00    0.12
   6  17   2    0.07    0.12
  -6 -17  -2   -0.10    0.10
   6  17   1    0.04    0.11
   6  17   1   -0.11    0.10
   6  17   1    0.07    0.11
   6  17   0    0.44    0.15
   6  17   0    0.48    0.15
   6  17   0    0.56    0.15
   6  17  -1    2.35    0.27
   6  17  -1    1.95    0.24
   6  17  -1    1.93    0.24
  -6 -17   1    2.03    0.24
  -6 -17   1    2.21    0.25
   6  17  -2    2.56    0.27
   6  17  -2    2.62    0.28
   6  17  -2    2.33    0.25
  -6 -17   2    2.34    0.26
  -6 -17   2    2.65    0.28
   6  17  -3    0.43    0.13
   6  17  -3    0.58    0.15
   6  17  -3    0.49    0.14
  -6 -17   3    0.52    0.16
  -6 -17   3    0.37    0.16
   6  17  -4   -0.01    0.10
   6  17  -4   -0.04    0.07
   6  17  -4    0.01    0.07
  -6 -17   4    0.04    0.11
  -6 -17   4    0.04    0.12
   6  17  -5    0.03    0.11
  -6 -17   5    0.05    0.12
  -6 -17   5   -0.04    0.10
   6  17  -6    0.37    0.15
  -6 -17   6    0.33    0.15
  -6 -17   6    0.09    0.14
   6  17  -7    0.10    0.14
  -6 -17   7    0.04    0.13
   7  17   2    0.12    0.16
   7  17   1    0.13    0.14
   7  17   0    0.10    0.12
   7  17   0    0.00    0.12
   7  17   0    0.21    0.13
   7  17  -1    0.35    0.15
   7  17  -1    0.34    0.14
   7  17  -1    0.30    0.14
   7  17  -2    0.09    0.11
   7  17  -2    0.05    0.12
   7  17  -2    0.04    0.10
  -7 -17   2   -0.01    0.11
  -7 -17   2    0.07    0.11
   7  17  -3    0.65    0.17
   7  17  -3    0.35    0.14
   7  17  -3    0.41    0.14
  -7 -17   3    0.33    0.14
  -7 -17   3    0.33    0.15
   7  17  -4    0.17    0.13
  -7 -17   4    0.24    0.14
  -7 -17   4    0.21    0.15
   7  17  -5    0.13    0.13
  -7 -17   5    0.09    0.12
  -7 -17   5    0.14    0.14
   7  17  -6    0.06    0.12
  -7 -17   6   -0.02    0.14
  -7 -17   7    0.05    0.15
   8  17   0    0.32    0.16
   8  17  -1   -0.05    0.12
   8  17  -2    0.20    0.13
   8  17  -2   -0.06    0.10
  -8 -17   2    0.07    0.13
  -8 -17   3    0.21    0.15
  -8 -17   3    0.54    0.18
  -8 -17   4    0.00    0.14
  -8 -17   5   -0.02    0.15
  -8 -17   6    0.04    0.15
   8 -18  -5   -0.03    0.13
   8 -18  -4    0.15    0.14
   8 -18  -3    0.97    0.20
   8 -18  -2    0.40    0.16
   8 -18  -1    0.95    0.21
   8 -18  -1    0.89    0.21
   7 -18  -6    0.24    0.17
   7 -18  -5    0.85    0.21
   7 -18  -5    0.37    0.16
   7 -18  -4    0.17    0.15
   7 -18  -4    0.26    0.15
   7 -18  -3    0.24    0.14
   7 -18  -3    0.40    0.16
   7 -18  -2    0.02    0.12
   7 -18  -2    0.32    0.15
   7 -18  -1    1.85    0.26
   7 -18  -1    1.40    0.23
   7 -18   0    0.18    0.13
  -7  18  -1    0.93    0.21
  -7  18  -1    1.23    0.23
   6 -18  -7    0.01    0.12
   6 -18  -6    0.01    0.11
   6 -18  -6    0.09    0.13
   6 -18  -5    0.28    0.14
   6 -18  -5    0.13    0.12
   6 -18  -4    1.05    0.22
   6 -18  -4    1.33    0.22
   6 -18  -3    1.54    0.24
   6 -18  -3    1.17    0.21
   6 -18  -2    2.30    0.27
   6 -18  -2    2.09    0.27
   6 -18  -1    1.21    0.21
   6 -18  -1    0.76    0.18
  -6  18   0    0.33    0.14
  -6  18   0    0.38    0.14
   6 -18   0    0.30    0.14
   6 -18   0    0.39    0.14
  -6  18  -1    0.86    0.19
  -6  18  -1    1.01    0.20
  -6  18  -2    0.04    0.13
  -6  18  -2   -0.08    0.11
  -6  18  -3    0.47    0.20
   5 -18  -6    0.12    0.11
   5 -18  -6   -0.02    0.10
   5 -18  -5    0.50    0.16
   5 -18  -5    0.57    0.16
   5 -18  -4    1.27    0.22
   5 -18  -4    1.36    0.21
   5 -18  -3    0.01    0.10
   5 -18  -3   -0.03    0.09
   5 -18  -2   -0.01    0.09
   5 -18  -2    0.00    0.10
  -5  18   1    2.10    0.21
  -5  18   1    2.01    0.21
   5 -18  -1    2.14    0.26
   5 -18  -1    1.89    0.24
  -5  18   0    0.17    0.10
  -5  18   0    0.14    0.11
   5 -18   0    0.24    0.12
   5 -18   0    0.14    0.11
  -5  18  -1    0.01    0.10
  -5  18  -1    0.22    0.12
   5 -18   1    0.08    0.11
   5 -18   1    0.25    0.13
  -5  18  -2    0.09    0.13
  -5  18  -2    0.16    0.14
  -5  18  -3    0.77    0.20
  -5  18  -3    0.67    0.20
  -5  18  -4    0.03    0.14
   4 -18  -7    0.21    0.15
   4 -18  -6   -0.05    0.11
   4 -18  -6    0.11    0.11
   4 -18  -6   -0.19    0.09
   4 -18  -5    0.04    0.10
   4 -18  -5   -0.14    0.07
   4 -18  -4    1.01    0.19
   4 -18  -4    0.92    0.17
   4 -18  -3    3.83    0.28
   4 -18  -3    4.50    0.32
   4 -18  -2    2.67    0.28
   4 -18  -2    3.23    0.26
  -4  18   1    0.05    0.09
  -4  18   1    0.03    0.09
   4 -18  -1    0.05    0.09
   4 -18  -1   -0.03    0.09
  -4  18   0    0.16    0.11
  -4  18   0    0.17    0.10
   4 -18   0    0.29    0.13
   4 -18   0    0.21    0.11
  -4  18  -1    3.96    0.28
  -4  18  -1    3.71    0.28
   4 -18   1    4.16    0.29
   4 -18   1    3.92    0.27
  -4  18  -2    1.50    0.22
  -4  18  -2    1.73    0.24
   4 -18   2    1.51    0.20
   4 -18   2    1.71    0.22
  -4  18  -3    0.29    0.14
  -4  18  -3    0.27    0.15
  -4  18  -4   -0.02    0.12
  -4  18  -4    0.04    0.14
  -4  18  -5    0.01    0.14
   3 -18  -7    0.27    0.16
   3 -18  -6    0.31    0.15
   3 -18  -5    1.70    0.21
   3 -18  -5    1.44    0.21
   3 -18  -4    4.10    0.26
   3 -18  -4    4.59    0.29
   3 -18  -4    4.48    0.30
   3 -18  -3    0.29    0.13
   3 -18  -3    0.61    0.15
  -3  18   2    3.46    0.21
  -3  18   2    2.76    0.20
   3 -18  -2    2.67    0.27
   3 -18  -2    2.88    0.23
  -3  18   1    5.65    0.30
  -3  18   1    6.21    0.30
   3 -18  -1    5.88    0.32
   3 -18  -1    5.60    0.33
  -3  18   0    0.24    0.11
  -3  18   0    0.28    0.11
   3 -18   0    0.17    0.11
   3 -18   0    0.11    0.11
  -3  18  -1    0.60    0.15
  -3  18  -1    0.64    0.15
   3 -18   1    0.28    0.12
   3 -18   1    0.64    0.15
  -3  18  -2   -0.03    0.08
  -3  18  -2    0.14    0.11
   3 -18   2   -0.06    0.08
   3 -18   2    0.04    0.10
  -3  18  -3    1.33    0.22
  -3  18  -3    1.35    0.22
  -3  18  -4    0.34    0.16
  -3  18  -4    0.16    0.14
  -3  18  -5    1.67    0.27
   2 -18  -7    0.07    0.14
   2 -18  -6    0.00    0.10
   2 -18  -5    0.13    0.10
   2 -18  -5    0.12    0.10
   2 -18  -4    0.81    0.16
   2 -18  -4    0.60    0.14
   2 -18  -4    1.19    0.17
  -2  18   3    0.23    0.09
  -2  18   3    0.07    0.09
   2 -18  -3    0.09    0.09
   2 -18  -3    0.11    0.10
   2 -18  -3    0.19    0.10
  -2  18   2   21.03    0.59
  -2  18   2   19.66    0.60
   2 -18  -2   21.08    0.67
   2 -18  -2   20.72    0.67
  -2  18   1    3.84    0.25
  -2  18   1    4.01    0.24
   2 -18  -1    3.56    0.26
   2 -18  -1    3.95    0.27
  -2  18   0   -0.07    0.09
  -2  18   0   -0.09    0.08
   2 -18   0   -0.06    0.08
   2 -18   0   -0.10    0.07
  -2  18  -1    6.89    0.35
  -2  18  -1    7.41    0.37
   2 -18   1    6.59    0.35
   2 -18   1    7.78    0.36
  -2  18  -2    0.12    0.11
  -2  18  -2    0.03    0.10
   2 -18   2    0.13    0.10
   2 -18   2    0.14    0.09
  -2  18  -3    1.40    0.21
  -2  18  -3    1.45    0.21
   2 -18   3    1.36    0.18
   2 -18   3    1.34    0.18
  -2  18  -4    0.04    0.13
  -2  18  -4    0.10    0.13
  -2  18  -5    0.77    0.19
  -2  18  -5    0.31    0.16
  -2  18  -6    0.24    0.16
   1 -18  -6    1.93    0.26
   1 -18  -5    1.02    0.19
   1 -18  -4    0.09    0.09
   1 -18  -4    0.14    0.10
   1 -18  -4    0.14    0.09
  -1  18   3    4.56    0.25
  -1  18   3    4.58    0.26
   1 -18  -3    4.72    0.28
   1 -18  -3    4.88    0.27
   1 -18  -3    4.79    0.28
  -1  18   2    3.23    0.21
  -1  18   2    3.00    0.21
   1 -18  -2    3.16    0.20
   1 -18  -2    2.83    0.23
   1 -18  -2    3.45    0.23
  -1  18   1    3.97    0.24
  -1  18   1    4.10    0.25
   1 -18  -1    3.70    0.24
   1 -18  -1    3.77    0.25
  -1  18   0    3.83    0.24
  -1  18   0    3.17    0.23
   1 -18   0    3.74    0.25
   1 -18   0    3.39    0.25
  -1  18  -1    6.60    0.34
  -1  18  -1    6.50    0.33
   1 -18   1    6.23    0.32
   1 -18   1    6.60    0.34
  -1  18  -2    2.47    0.24
  -1  18  -2    2.25    0.23
   1 -18   2    2.04    0.22
   1 -18   2    1.83    0.20
  -1  18  -3    5.28    0.34
  -1  18  -3    5.68    0.34
   1 -18   3    5.86    0.32
   1 -18   3    6.00    0.32
  -1  18  -4    0.00    0.10
  -1  18  -4    0.00    0.10
   1 -18   4   -0.10    0.09
   1 -18   4    0.08    0.09
  -1  18  -5    1.08    0.21
  -1  18  -5    1.29    0.23
  -1  18  -6    0.55    0.18
  -1  18  -6    0.62    0.18
   0 -18  -6    0.22    0.14
   0 -18  -5    0.52    0.16
   0  18   4    9.21    0.39
   0  18   4   10.46    0.42
   0 -18  -4    9.28    0.44
   0  18   3    0.35    0.12
   0  18   3    0.23    0.10
   0 -18  -3    0.21    0.11
   0 -18  -3    0.28    0.10
   0 -18  -3    0.11    0.08
   0  18   2    0.10    0.09
   0  18   2    0.27    0.10
   0 -18  -2    0.10    0.10
   0 -18  -2    0.25    0.10
   0 -18  -2    0.31    0.09
   0  18   1   23.53    0.66
   0  18   1   23.10    0.68
   0 -18  -1   22.04    0.67
   0 -18  -1   22.56    0.69
   0 -18  -1   22.93    0.63
   0  18   0    8.33    0.36
   0  18   0    8.05    0.36
   0 -18   0    7.88    0.36
   0 -18   0    8.40    0.37
   0 -18   0    8.50    0.29
   0  18  -1   22.37    0.67
   0  18  -1   22.53    0.69
   0 -18   1   21.82    0.68
   0 -18   1   21.92    0.68
   0  18  -2    0.25    0.12
   0  18  -2    0.20    0.11
   0 -18   2    0.24    0.11
   0 -18   2    0.33    0.11
   0  18  -3    0.16    0.11
   0  18  -3    0.04    0.11
   0 -18   3    0.22    0.11
   0 -18   3    0.12    0.12
   0  18  -4    9.67    0.45
   0  18  -4    9.83    0.47
   0 -18   4    9.26    0.42
   0 -18   4   10.54    0.43
   0  18  -5    0.71    0.16
   0  18  -5    0.46    0.15
   0  18  -6    0.20    0.14
   0  18  -6    0.10    0.13
   0  18  -7    0.20    0.16
  -1 -18  -6    0.64    0.19
   1  18   5    0.97    0.18
   1  18   5    0.80    0.17
  -1 -18  -5    0.57    0.17
   1  18   4   -0.04    0.09
   1  18   4    0.02    0.09
  -1 -18  -4    0.11    0.10
   1  18   3    5.88    0.32
   1  18   3    6.18    0.33
  -1 -18  -3    6.73    0.35
   1  18   2    2.41    0.22
   1  18   2    2.25    0.23
  -1 -18  -2    1.96    0.20
  -1 -18  -2    2.46    0.20
  -1 -18  -2    2.04    0.20
   1  18   1    6.56    0.31
   1  18   1    6.90    0.33
  -1 -18  -1    6.64    0.30
  -1 -18  -1    6.67    0.31
  -1 -18  -1    6.19    0.31
   1  18   0    3.42    0.24
   1  18   0    3.21    0.23
   1  18   0    3.67    0.20
  -1 -18   0    3.69    0.24
  -1 -18   0    3.26    0.24
   1  18  -1    3.59    0.18
   1  18  -1    3.50    0.24
   1  18  -1    3.71    0.25
  -1 -18   1    3.89    0.27
  -1 -18   1    4.16    0.25
   1  18  -2    3.04    0.23
   1  18  -2    3.40    0.25
  -1 -18   2    3.40    0.26
  -1 -18   2    3.16    0.24
   1  18  -3    4.64    0.29
   1  18  -3    4.62    0.30
  -1 -18   3    4.84    0.31
  -1 -18   3    4.69    0.30
   1  18  -4    0.14    0.12
   1  18  -4    0.06    0.10
  -1 -18   4    0.13    0.11
  -1 -18   4    0.01    0.10
   1  18  -5    0.96    0.18
   1  18  -5    1.10    0.20
  -1 -18   5    1.07    0.18
  -1 -18   5    0.92    0.17
   1  18  -6    2.22    0.28
   1  18  -6    2.14    0.27
   1  18  -7    0.30    0.16
   1  18  -7   -0.12    0.12
   2  18   5    0.41    0.15
   2  18   5    0.52    0.16
  -2 -18  -5    0.51    0.17
   2  18   4    0.10    0.10
   2  18   4   -0.03    0.10
  -2 -18  -4    0.18    0.11
   2  18   3    1.31    0.19
   2  18   3    1.57    0.20
  -2 -18  -3    1.58    0.21
   2  18   2    0.09    0.10
   2  18   2    0.18    0.10
  -2 -18  -2   -0.01    0.08
  -2 -18  -2    0.07    0.09
  -2 -18  -2    0.07    0.08
   2  18   1    6.50    0.33
   2  18   1    6.77    0.34
  -2 -18  -1    6.75    0.33
  -2 -18  -1    6.75    0.31
  -2 -18  -1    7.00    0.33
   2  18   0    0.06    0.09
   2  18   0    0.11    0.09
   2  18   0   -0.12    0.05
  -2 -18   0   -0.12    0.08
  -2 -18   0   -0.10    0.08
   2  18  -1    3.98    0.26
   2  18  -1    3.82    0.25
   2  18  -1    4.42    0.24
  -2 -18   1    3.90    0.25
  -2 -18   1    3.85    0.25
   2  18  -2   19.10    0.62
   2  18  -2   20.42    0.59
   2  18  -2   19.46    0.65
  -2 -18   2   20.10    0.67
  -2 -18   2   20.43    0.66
   2  18  -3    0.11    0.07
   2  18  -3    0.23    0.12
   2  18  -3    0.11    0.11
  -2 -18   3    0.11    0.12
  -2 -18   3    0.14    0.11
   2  18  -4    0.95    0.17
   2  18  -4    0.74    0.15
  -2 -18   4    0.90    0.17
  -2 -18   4    0.93    0.17
   2  18  -5    0.14    0.11
   2  18  -5   -0.14    0.09
  -2 -18   5   -0.06    0.09
  -2 -18   5    0.00    0.10
   2  18  -6    0.04    0.12
   2  18  -6    0.06    0.11
  -2 -18   6   -0.04    0.10
  -2 -18   6    0.16    0.12
   2  18  -7    0.21    0.15
   3  18   5    1.65    0.25
   3  18   5    1.46    0.24
   3  18   4    0.20    0.13
   3  18   4    0.43    0.15
  -3 -18  -4   -0.04    0.10
   3  18   3    1.11    0.19
   3  18   3    1.45    0.21
  -3 -18  -3    1.22    0.20
   3  18   2   -0.03    0.08
   3  18   2    0.19    0.11
  -3 -18  -2    0.12    0.08
   3  18   1    0.50    0.14
   3  18   1    0.49    0.13
  -3 -18  -1    0.43    0.12
  -3 -18  -1    0.46    0.12
   3  18   0    0.09    0.10
   3  18   0    0.48    0.14
   3  18   0    0.28    0.11
  -3 -18   0   -0.03    0.10
  -3 -18   0    0.11    0.09
   3  18  -1    6.21    0.31
   3  18  -1    6.04    0.32
   3  18  -1    5.81    0.32
  -3 -18   1    5.29    0.31
  -3 -18   1    5.89    0.32
   3  18  -2    2.56    0.21
   3  18  -2    2.90    0.21
   3  18  -2    3.21    0.24
  -3 -18   2    2.98    0.26
  -3 -18   2    2.54    0.25
   3  18  -3    0.30    0.10
   3  18  -3    0.59    0.14
   3  18  -3    0.45    0.13
  -3 -18   3    0.27    0.12
  -3 -18   3    0.48    0.13
   3  18  -4    3.86    0.25
   3  18  -4    3.84    0.27
   3  18  -4    4.07    0.28
  -3 -18   4    3.83    0.28
  -3 -18   4    4.06    0.30
   3  18  -5    1.45    0.21
   3  18  -5    1.49    0.21
  -3 -18   5    1.15    0.20
  -3 -18   5    1.50    0.23
   3  18  -6    0.27    0.14
   3  18  -6    0.28    0.14
  -3 -18   6    0.67    0.17
  -3 -18   6    0.40    0.15
   4  18   5    0.21    0.16
   4  18   4   -0.25    0.09
   4  18   4   -0.10    0.10
  -4 -18  -4    0.02    0.12
   4  18   3    0.20    0.14
   4  18   3    0.04    0.12
  -4 -18  -3    0.18    0.13
   4  18   2    1.35    0.22
   4  18   2    1.15    0.20
  -4 -18  -2    1.29    0.20
   4  18   1    3.18    0.26
   4  18   1    3.42    0.27
   4  18   1    3.24    0.26
   4  18   0    0.26    0.12
   4  18   0    0.26    0.11
   4  18   0    0.42    0.13
  -4 -18   0    0.12    0.10
  -4 -18   0    0.30    0.12
   4  18  -1   -0.08    0.09
   4  18  -1    0.02    0.10
   4  18  -1   -0.11    0.06
  -4 -18   1   -0.05    0.08
  -4 -18   1   -0.06    0.09
   4  18  -2    2.91    0.23
   4  18  -2    2.87    0.23
   4  18  -2    2.75    0.23
  -4 -18   2    3.01    0.26
  -4 -18   2    3.22    0.25
   4  18  -3    3.69    0.25
   4  18  -3    3.88    0.26
   4  18  -3    3.81    0.27
  -4 -18   3    3.79    0.29
  -4 -18   3    3.50    0.28
   4  18  -4    0.66    0.15
   4  18  -4    0.91    0.16
   4  18  -4    0.96    0.16
  -4 -18   4    0.82    0.17
  -4 -18   4    0.48    0.15
   4  18  -5    0.06    0.10
   4  18  -5    0.00    0.08
   4  18  -5    0.03    0.10
  -4 -18   5   -0.14    0.09
  -4 -18   5    0.02    0.10
  -4 -18   6   -0.03    0.11
  -4 -18   6    0.03    0.12
  -4 -18   7    0.08    0.12
  -4 -18   7    0.09    0.14
   5  18   4   -0.04    0.12
   5  18   3    0.66    0.19
   5  18   3    0.38    0.16
  -5 -18  -3    0.42    0.16
   5  18   2    0.23    0.14
   5  18   2    0.38    0.14
  -5 -18  -2    0.35    0.14
   5  18   1    0.22    0.12
   5  18   1    0.10    0.11
   5  18   1    0.09    0.10
   5  18   0    0.19    0.11
   5  18   0    0.23    0.12
   5  18   0    0.14    0.11
  -5 -18   0    0.02    0.09
  -5 -18   0    0.15    0.11
   5  18  -1    1.85    0.23
   5  18  -1    1.75    0.22
   5  18  -1    2.39    0.25
  -5 -18   1    1.91    0.23
  -5 -18   1    2.53    0.25
   5  18  -2    0.10    0.09
   5  18  -2    0.04    0.09
   5  18  -2    0.00    0.09
  -5 -18   2    0.02    0.10
  -5 -18   2    0.04    0.10
   5  18  -3    0.15    0.10
   5  18  -3    0.05    0.08
   5  18  -3   -0.04    0.09
  -5 -18   3    0.15    0.12
  -5 -18   3   -0.03    0.10
   5  18  -4    1.34    0.20
   5  18  -4    0.67    0.16
   5  18  -4    0.84    0.16
  -5 -18   4    0.80    0.17
  -5 -18   4    0.91    0.19
   5  18  -5    0.38    0.14
   5  18  -5    0.34    0.14
  -5 -18   5    0.54    0.16
  -5 -18   5    0.47    0.16
   5  18  -6    0.03    0.10
  -5 -18   6    0.08    0.12
  -5 -18   6   -0.06    0.11
  -5 -18   7   -0.15    0.11
  -5 -18   7    0.08    0.14
   6  18   3    0.48    0.19
   6  18   2    0.12    0.13
   6  18   1    1.10    0.21
   6  18   1    1.34    0.23
   6  18   0    0.37    0.15
   6  18   0    0.52    0.16
   6  18   0    0.36    0.15
   6  18  -1    0.85    0.18
   6  18  -1    0.81    0.17
   6  18  -1    0.92    0.19
  -6 -18   1    0.74    0.17
  -6 -18   1    0.74    0.16
   6  18  -2    1.65    0.22
   6  18  -2    1.62    0.22
   6  18  -2    1.73    0.23
  -6 -18   2    2.22    0.26
  -6 -18   2    1.95    0.24
   6  18  -3    1.28    0.19
   6  18  -3    1.35    0.21
   6  18  -3    1.17    0.19
  -6 -18   3    1.15    0.21
  -6 -18   3    1.43    0.21
   6  18  -4    1.70    0.24
   6  18  -4    0.89    0.17
   6  18  -4    1.10    0.18
  -6 -18   4    1.51    0.23
  -6 -18   4    1.43    0.24
   6  18  -5    0.06    0.11
  -6 -18   5    0.10    0.12
  -6 -18   5   -0.10    0.10
   6  18  -6    0.08    0.11
  -6 -18   6    0.09    0.14
  -6 -18   6    0.01    0.12
  -6 -18   7    0.15    0.15
   7  18   1    0.99    0.22
   7  18   0    0.08    0.12
   7  18   0    0.18    0.14
   7  18   0   -0.01    0.12
   7  18  -1    1.44    0.23
   7  18  -1    1.71    0.25
   7  18  -1    1.71    0.26
   7  18  -2    0.01    0.10
   7  18  -2    0.19    0.12
   7  18  -2    0.13    0.12
  -7 -18   2    0.05    0.12
  -7 -18   2    0.22    0.13
   7  18  -3    0.40    0.15
   7  18  -3    0.11    0.11
   7  18  -3    0.24    0.13
  -7 -18   3    0.24    0.16
  -7 -18   3    0.33    0.15
   7  18  -4    0.23    0.14
  -7 -18   4    0.08    0.13
  -7 -18   4    0.23    0.15
   7  18  -5    0.71    0.19
  -7 -18   5    0.61    0.20
  -7 -18   5    0.56    0.17
  -7 -18   6    0.23    0.17
   8  18  -1    0.51    0.17
   8  18  -2    0.13    0.13
   8  18  -2    0.19    0.13
  -8 -18   2   -0.01    0.13
   8  18  -3    0.67    0.18
  -8 -18   3    0.38    0.17
  -8 -18   3    0.67    0.19
  -8 -18   4    0.14    0.15
  -8 -18   5    0.20    0.16
   8 -19  -5   -0.01    0.15
   8 -19  -4    0.09    0.13
   8 -19  -3    0.17    0.13
   8 -19  -2    0.16    0.15
   8 -19  -1   -0.07    0.13
   7 -19  -6    0.05    0.14
   7 -19  -5    0.52    0.17
   7 -19  -4    0.10    0.13
   7 -19  -4    0.04    0.12
   7 -19  -3   -0.02    0.12
   7 -19  -3    0.17    0.13
   7 -19  -2    0.03    0.11
   7 -19  -2    0.11    0.13
   7 -19  -1    0.06    0.13
   7 -19  -1   -0.13    0.11
   7 -19   0    0.99    0.21
  -7  19  -1   -0.05    0.13
   6 -19  -7   -0.08    0.13
   6 -19  -6    0.80    0.19
   6 -19  -6    0.37    0.16
   6 -19  -5   -0.02    0.11
   6 -19  -5   -0.10    0.10
   6 -19  -4    0.45    0.17
   6 -19  -4    0.77    0.18
   6 -19  -3    0.48    0.16
   6 -19  -3    0.10    0.13
   6 -19  -2    0.31    0.14
   6 -19  -2    0.15    0.12
   6 -19  -1    0.02    0.10
   6 -19  -1    0.01    0.11
  -6  19   0    0.07    0.11
  -6  19   0   -0.03    0.10
   6 -19   0    0.02    0.11
   6 -19   0    0.23    0.12
  -6  19  -1    0.10    0.12
  -6  19  -1    0.19    0.13
  -6  19  -2    0.79    0.20
  -6  19  -2    0.89    0.21
   5 -19  -6   -0.09    0.10
   5 -19  -6    0.13    0.12
   5 -19  -5    0.00    0.12
   5 -19  -5    0.15    0.13
   5 -19  -4    6.30    0.39
   5 -19  -4    7.01    0.42
   5 -19  -3    0.47    0.16
   5 -19  -3    0.69    0.16
   5 -19  -2    1.05    0.19
   5 -19  -2    1.33    0.22
  -5  19   1    0.13    0.10
   5 -19  -1    0.13    0.12
   5 -19  -1    0.12    0.11
  -5  19   0    0.01    0.10
  -5  19   0   -0.14    0.08
   5 -19   0    0.21    0.12
   5 -19   0   -0.05    0.11
  -5  19  -1    0.07    0.11
  -5  19  -1    0.12    0.12
   5 -19   1    0.08    0.11
   5 -19   1    0.05    0.11
  -5  19  -2    0.42    0.16
  -5  19  -2    0.22    0.14
  -5  19  -3    0.07    0.14
   4 -19  -7   -0.02    0.13
   4 -19  -6    1.91    0.25
   4 -19  -6    1.66    0.23
   4 -19  -5    0.11    0.12
   4 -19  -5    0.23    0.11
   4 -19  -4    0.65    0.16
   4 -19  -4    0.18    0.12
   4 -19  -3    1.76    0.23
   4 -19  -3    1.75    0.24
   4 -19  -2   10.37    0.48
   4 -19  -2   11.16    0.49
  -4  19   1    3.30    0.24
  -4  19   1    3.42    0.25
   4 -19  -1    3.53    0.27
   4 -19  -1    3.65    0.28
  -4  19   0    9.33    0.42
  -4  19   0    9.42    0.42
   4 -19   0    9.40    0.44
   4 -19   0    9.85    0.46
  -4  19  -1    0.22    0.13
  -4  19  -1    0.74    0.17
   4 -19   1    0.52    0.15
   4 -19   1    0.61    0.15
  -4  19  -2    3.49    0.29
  -4  19  -2    3.18    0.31
   4 -19   2    3.29    0.27
   4 -19   2    2.90    0.25
  -4  19  -3    0.01    0.12
  -4  19  -3    0.11    0.13
  -4  19  -4    0.12    0.15
   3 -19  -7   -0.12    0.12
   3 -19  -6    5.08    0.36
   3 -19  -5   -0.16    0.08
   3 -19  -5    0.05    0.11
   3 -19  -5    0.05    0.10
   3 -19  -4    9.03    0.44
   3 -19  -4   10.32    0.45
   3 -19  -3    1.48    0.21
   3 -19  -3    1.97    0.24
  -3  19   2    0.39    0.11
  -3  19   2    0.31    0.11
   3 -19  -2    0.46    0.13
   3 -19  -2    0.25    0.12
  -3  19   1    0.18    0.11
  -3  19   1    0.16    0.11
   3 -19  -1    0.38    0.12
   3 -19  -1    0.26    0.12
  -3  19   0    2.77    0.23
  -3  19   0    2.62    0.24
   3 -19   0    2.65    0.23
   3 -19   0    2.73    0.24
  -3  19  -1    1.82    0.22
  -3  19  -1    1.65    0.21
   3 -19   1    1.88    0.22
   3 -19   1    1.47    0.20
  -3  19  -2    4.48    0.32
  -3  19  -2    4.69    0.32
   3 -19   2    4.62    0.30
   3 -19   2    4.69    0.30
  -3  19  -3    0.52    0.16
  -3  19  -3    0.64    0.16
  -3  19  -4    1.82    0.27
  -3  19  -4    2.24    0.29
  -3  19  -5    0.28    0.16
   2 -19  -7    0.23    0.15
   2 -19  -6    0.17    0.12
   2 -19  -5    0.19    0.12
   2 -19  -4    8.76    0.42
   2 -19  -4    8.27    0.39
   2 -19  -4    9.19    0.41
  -2  19   3    1.95    0.19
  -2  19   3    2.10    0.18
   2 -19  -3    2.27    0.24
   2 -19  -3    2.22    0.24
   2 -19  -3    2.11    0.18
  -2  19   2   15.51    0.51
  -2  19   2   15.54    0.49
   2 -19  -2   14.94    0.55
   2 -19  -2   15.55    0.56
  -2  19   1    0.17    0.11
  -2  19   1    0.22    0.11
   2 -19  -1    0.11    0.10
   2 -19  -1    0.13    0.10
  -2  19   0    0.69    0.14
  -2  19   0    0.68    0.14
   2 -19   0    0.59    0.14
   2 -19   0    0.54    0.13
  -2  19  -1    0.44    0.14
  -2  19  -1    0.46    0.14
   2 -19   1    0.48    0.14
   2 -19   1    0.65    0.15
  -2  19  -2    2.82    0.27
  -2  19  -2    3.23    0.26
   2 -19   2    2.66    0.26
   2 -19   2    2.67    0.25
  -2  19  -3   -0.01    0.09
  -2  19  -3    0.00    0.10
   2 -19   3   -0.01    0.05
   2 -19   3   -0.05    0.05
  -2  19  -4    1.65    0.25
  -2  19  -4    2.34    0.29
  -2  19  -5    0.15    0.13
  -2  19  -5    0.12    0.14
  -2  19  -6    0.10    0.16
   1 -19  -6    0.91    0.20
   1 -19  -5    0.68    0.17
   1 -19  -4    5.20    0.31
   1 -19  -4    5.11    0.29
   1 -19  -4    4.85    0.29
  -1  19   3    0.43    0.12
  -1  19   3    0.19    0.11
   1 -19  -3    0.57    0.13
   1 -19  -3    0.30    0.11
   1 -19  -3    0.37    0.11
  -1  19   2    0.11    0.10
  -1  19   2    0.05    0.09
   1 -19  -2    0.12    0.10
   1 -19  -2    0.06    0.07
   1 -19  -2    0.05    0.10
  -1  19   1    0.50    0.12
  -1  19   1    0.46    0.12
   1 -19  -1    0.55    0.13
   1 -19  -1    0.66    0.14
  -1  19   0    3.63    0.25
  -1  19   0    3.50    0.24
   1 -19   0    3.40    0.24
   1 -19   0    3.02    0.25
  -1  19  -1    0.06    0.09
  -1  19  -1    0.04    0.09
   1 -19   1    0.12    0.09
   1 -19   1    0.07    0.10
  -1  19  -2    0.06    0.10
  -1  19  -2    0.11    0.11
   1 -19   2    0.43    0.13
   1 -19   2    0.41    0.12
  -1  19  -3    0.31    0.13
  -1  19  -3    0.28    0.13
   1 -19   3    0.26    0.11
   1 -19   3    0.10    0.09
  -1  19  -4    3.54    0.29
  -1  19  -4    3.05    0.31
   1 -19   4    3.89    0.27
   1 -19   4    4.23    0.28
  -1  19  -5    0.13    0.12
  -1  19  -5    0.30    0.15
  -1  19  -6    1.99    0.29
  -1  19  -6    2.95    0.35
   0 -19  -6    0.22    0.14
   0 -19  -5    1.38    0.22
   0  19   4    0.34    0.12
   0  19   4    0.22    0.09
   0 -19  -4    0.49    0.14
   0  19   3    1.29    0.17
   0  19   3    1.21    0.17
   0 -19  -3    1.25    0.17
   0 -19  -3    1.18    0.16
   0 -19  -3    1.18    0.17
   0  19   2    2.83    0.21
   0  19   2    2.44    0.23
   0 -19  -2    2.32    0.19
   0 -19  -2    2.11    0.22
   0 -19  -2    2.44    0.20
   0  19   1    0.47    0.12
   0  19   1    0.21    0.10
   0 -19  -1    0.31    0.08
   0 -19  -1    0.20    0.10
   0 -19  -1    0.24    0.10
   0  19   0    0.03    0.09
   0  19   0    0.11    0.10
   0 -19   0    0.03    0.08
   0 -19   0    0.23    0.10
   0  19  -1    0.19    0.10
   0  19  -1    0.23    0.11
   0 -19   1    0.17    0.10
   0 -19   1    0.03    0.08
   0  19  -2    2.11    0.23
   0  19  -2    2.12    0.23
   0 -19   2    2.37    0.24
   0 -19   2    2.50    0.21
   0  19  -3    1.38    0.20
   0  19  -3    1.34    0.20
   0 -19   3    1.38    0.19
   0 -19   3    1.31    0.19
   0  19  -4    0.52    0.14
   0  19  -4    0.28    0.14
   0 -19   4    0.40    0.13
   0 -19   4    0.40    0.13
   0  19  -5    1.37    0.22
   0  19  -5    1.38    0.22
   0  19  -6   -0.03    0.12
   0  19  -6    0.28    0.16
   0  19  -7    0.23    0.16
   1  19   5   -0.01    0.11
  -1 -19  -5    0.05    0.10
   1  19   4    3.54    0.26
   1  19   4    3.50    0.26
  -1 -19  -4    3.53    0.29
   1  19   3    0.28    0.11
   1  19   3    0.25    0.11
  -1 -19  -3    0.17    0.11
   1  19   2    0.18    0.11
   1  19   2    0.27    0.12
  -1 -19  -2    0.44    0.11
  -1 -19  -2    0.37    0.11
  -1 -19  -2    0.17    0.10
   1  19   1   -0.01    0.09
   1  19   1    0.20    0.10
  -1 -19  -1    0.13    0.10
  -1 -19  -1    0.19    0.10
  -1 -19  -1    0.16    0.08
   1  19   0    3.36    0.24
   1  19   0    3.27    0.23
  -1 -19   0    3.35    0.23
  -1 -19   0    3.35    0.24
   1  19  -1    0.65    0.14
   1  19  -1    0.39    0.09
   1  19  -1    0.57    0.13
  -1 -19   1    0.46    0.13
  -1 -19   1    0.81    0.15
   1  19  -2    0.30    0.13
   1  19  -2    0.08    0.11
  -1 -19   2    0.12    0.11
  -1 -19   2    0.08    0.11
   1  19  -3    0.28    0.13
   1  19  -3    0.21    0.13
  -1 -19   3    0.03    0.10
  -1 -19   3    0.33    0.12
   1  19  -4    5.29    0.33
   1  19  -4    5.06    0.33
  -1 -19   4    5.44    0.33
  -1 -19   4    4.96    0.32
   1  19  -5    0.26    0.14
   1  19  -5    0.63    0.17
  -1 -19   5    0.70    0.16
  -1 -19   5    0.94    0.18
   1  19  -6    0.67    0.18
   1  19  -6    1.05    0.21
   1  19  -7    0.47    0.19
   1  19  -7    0.43    0.18
   2  19   5   -0.02    0.11
   2  19   5    0.26    0.13
  -2 -19  -5   -0.05    0.11
   2  19   4    1.73    0.24
   2  19   4    2.03    0.24
  -2 -19  -4    1.75    0.24
   2  19   3   -0.03    0.09
   2  19   3    0.02    0.10
  -2 -19  -3    0.18    0.10
   2  19   2    3.03    0.24
   2  19   2    2.47    0.25
  -2 -19  -2    2.84    0.20
  -2 -19  -2    2.57    0.23
  -2 -19  -2    2.55    0.22
   2  19   1    0.63    0.14
   2  19   1    0.48    0.14
  -2 -19  -1    0.42    0.12
  -2 -19  -1    0.46    0.12
  -2 -19  -1    0.57    0.14
   2  19   0    0.69    0.15
   2  19   0    0.60    0.15
   2  19   0    0.56    0.11
  -2 -19   0    0.49    0.13
  -2 -19   0    0.52    0.13
   2  19  -1    0.31    0.09
   2  19  -1    0.45    0.12
   2  19  -1    0.23    0.11
  -2 -19   1    0.12    0.11
  -2 -19   1   -0.01    0.09
   2  19  -2   15.88    0.49
   2  19  -2   14.80    0.54
   2  19  -2   15.14    0.56
  -2 -19   2   14.84    0.55
  -2 -19   2   15.10    0.57
   2  19  -3    1.98    0.23
   2  19  -3    2.16    0.23
  -2 -19   3    1.97    0.24
  -2 -19   3    2.07    0.23
   2  19  -4    8.03    0.41
   2  19  -4    7.89    0.40
  -2 -19   4    8.37    0.43
  -2 -19   4    8.56    0.42
   2  19  -5    0.41    0.16
   2  19  -5    0.42    0.15
  -2 -19   5    0.45    0.15
  -2 -19   5    0.46    0.16
   2  19  -6    0.41    0.15
   2  19  -6    0.39    0.16
  -2 -19   6    0.40    0.15
  -2 -19   6    0.50    0.16
   2  19  -7    0.54    0.18
   3  19   5    0.14    0.14
   3  19   5    0.26    0.14
   3  19   4    1.88    0.26
   3  19   4    2.46    0.29
  -3 -19  -4    1.68    0.25
   3  19   3    0.54    0.16
   3  19   3    0.62    0.16
  -3 -19  -3    0.74    0.16
   3  19   2    4.64    0.30
   3  19   2    4.71    0.31
  -3 -19  -2    4.33    0.31
   3  19   1    1.94    0.23
   3  19   1    1.42    0.20
  -3 -19  -1    1.82    0.21
  -3 -19  -1    1.99    0.21
  -3 -19  -1    1.79    0.19
   3  19   0    2.60    0.22
   3  19   0    2.76    0.26
   3  19   0    2.48    0.25
  -3 -19   0    3.03    0.25
  -3 -19   0    2.54    0.21
   3  19  -1    0.24    0.12
   3  19  -1    0.24    0.10
   3  19  -1    0.07    0.11
  -3 -19   1    0.22    0.12
  -3 -19   1    0.25    0.12
   3  19  -2    0.07    0.10
   3  19  -2    0.38    0.12
   3  19  -2    0.24    0.10
  -3 -19   2    0.01    0.11
  -3 -19   2    0.55    0.15
   3  19  -3    1.81    0.21
   3  19  -3    1.72    0.19
   3  19  -3    1.33    0.19
  -3 -19   3    1.46    0.20
  -3 -19   3    1.40    0.21
   3  19  -4    9.02    0.42
   3  19  -4    8.03    0.41
   3  19  -4    9.01    0.39
  -3 -19   4    9.43    0.44
  -3 -19   4    9.22    0.45
[truncated: 129,836 more chars]
